# Supplementary material
Source: publisher site journal article supplement (https://www.spandidos-publications.com/1577/downloadSupplementary)
Supplement: Supplementary file 2 [file downloadSupplementary]

## Sheet: DE Gene Analysis
	2HS 2-fold up vs. 3HS											#		3HS 2-fold up vs. 2HS											#		No Significant Difference
												#													#
Name	id	baseMean	baseMeanA	baseMeanB	foldChange	log2FoldChange	log2AverageIntensity	pval	padj	'-Log10(pval)	Annotation	#	Name	id	baseMean	baseMeanA	baseMeanB	foldChange	log2FoldChange	log2AverageIntensity	pval	padj	'-Log10(pval)	Annotation	#		id	baseMean	baseMeanA	baseMeanB	foldChange	log2FoldChange	log2AverageIntensity	pval	padj	'-Log10(pval)
GLIPR2	ENSOCUG00000000007	697.555	951.089	444.022	0.466856	-1.09895	9.34396	0.047583	1	1.32255	GLI pathogenesis-related 2 [Source:HGNC Symbol;Acc:HGNC:18007]	#	-	ENSOCUG00000000049	65.7139	16.2334	115.194	7.09611	2.82703	5.43441	0.00252615	0.333957	2.59754	-	#		ENSOCUG00000000001	17.0484	4.77454	29.3222	6.14136	2.61856	3.56464	0.117603	1	0.92958
GNE	ENSOCUG00000000010	229.85	336.128	123.572	0.367634	-1.44366	7.67104	0.0237746	1	1.62389	glucosamine (UDP-N-acetyl)-2-epimerase/N-acetylmannosamine kinase [Source:HGNC Symbol;Acc:HGNC:23657]	#	PC	ENSOCUG00000000078	87.6911	38.1963	137.186	3.5916	1.84463	6.17768	0.0231519	1	1.63541	pyruvate carboxylase [Source:HGNC Symbol;Acc:HGNC:8636]	#		ENSOCUG00000000003	2.5719	0.954908	4.18888	4.38669	2.13313	1	0.763521	1	0.117179
ERG	ENSOCUG00000000104	279.165	399.152	159.178	0.39879	-1.3263	7.97764	0.0314662	1	1.50216	v-ets avian erythroblastosis virus E26 oncogene homolog [Source:HGNC Symbol;Acc:HGNC:3446]	#	-	ENSOCUG00000000297	231.947	54.4298	409.463	7.52278	2.91127	7.22196	1.6772e-05	0.00806275	4.77542	-	#		ENSOCUG00000000004	675.494	779.205	571.783	0.733803	-0.446536	9.38259	0.418384	1	0.378425
CDO1	ENSOCUG00000000148	1958.55	2930.61	986.482	0.336613	-1.57084	10.7316	0.00327181	0.387343	2.48521	cysteine dioxygenase type 1 [Source:HGNC Symbol;Acc:HGNC:1795]	#	RA_R333_JSMC24CR	ENSOCUG00000000488	798.758	449.762	1147.75	2.55192	1.35158	9.48881	0.0144353	0.978636	1.84058	Oryctolagus cuniculus family with sequence similarity 83, member C (FAM83C), mRNA. [Source:RefSeq mRNA;Acc:NM_001171497]	#		ENSOCUG00000000005	115.586	132.732	98.4388	0.741634	-0.43122	6.83676	0.560304	1	0.251576
GREM2	ENSOCUG00000000171	130.527	191.937	69.1166	0.360101	-1.47353	6.84772	0.0408052	1	1.38928	gremlin 2, DAN family BMP antagonist [Source:HGNC Symbol;Acc:HGNC:17655]	#	-	ENSOCUG00000000490	34.189	7.63927	60.7388	7.95087	2.99111	4.42899	0.0144184	0.978636	1.84108	Uncharacterized protein [Source:UniProtKB/TrEMBL;Acc:G1SDE5]	#		ENSOCUG00000000006	204.018	220.584	187.453	0.849802	-0.234801	7.66778	0.719582	1	0.14292
CDH6	ENSOCUG00000000360	136.549	208.17	64.9277	0.311898	-1.68086	6.86119	0.0190915	1	1.71916	cadherin 6, type 2, K-cadherin (fetal kidney) [Source:HGNC Symbol;Acc:HGNC:1765]	#	HAP1	ENSOCUG00000000605	25.4261	4.77454	46.0777	9.65071	3.27064	3.89068	0.0219338	1	1.65889	huntingtin-associated protein 1 [Source:HGNC Symbol;Acc:HGNC:4812]	#		ENSOCUG00000000008	11.1199	19.0982	3.14166	0.164501	-2.60383	2.95345	0.226623	1	0.644695
ADAMTS8	ENSOCUG00000000370	163.917	237.772	90.061	0.37877	-1.40061	7.19313	0.0398931	1	1.3991	ADAM metallopeptidase with thrombospondin type 1 motif, 8 [Source:HGNC Symbol;Acc:HGNC:224]	#	ARHGEF28	ENSOCUG00000000629	351.583	190.027	513.138	2.70035	1.43315	8.28663	0.0165509	1	1.78118	Rho guanine nucleotide exchange factor (GEF) 28 [Source:HGNC Symbol;Acc:HGNC:30322]	#		ENSOCUG00000000009	1294.5	1156.39	1432.6	1.23885	0.309001	10.3299	0.56059	1	0.251355
HBB1	ENSOCUG00000000568	11535.3	17264.7	5805.79	0.33628	-1.57226	13.2894	0.00255622	0.335139	2.5924	Oryctolagus cuniculus hemoglobin, beta (HBB2), mRNA. [Source:RefSeq mRNA;Acc:NM_001082260]	#	CLDN23	ENSOCUG00000000632	319.426	172.838	466.013	2.69624	1.43095	8.14875	0.0181439	1	1.74127	claudin 23 [Source:HGNC Symbol;Acc:HGNC:17591]	#		ENSOCUG00000000012	674.725	805.943	543.508	0.674375	-0.568376	9.37034	0.303178	1	0.518302
RRAD	ENSOCUG00000000585	133.576	193.846	73.3055	0.378163	-1.40292	6.89731	0.049692	1	1.30371	Ras-related associated with diabetes [Source:HGNC Symbol;Acc:HGNC:10446]	#	EPHA2	ENSOCUG00000000786	1219.35	728.595	1710.11	2.34714	1.2309	10.1244	0.022249	1	1.65269	EPH receptor A2 [Source:HGNC Symbol;Acc:HGNC:3386]	#		ENSOCUG00000000013	51.3933	52.52	50.2666	0.957096	-0.0632652	5.68316	0.969591	1	0.0134114
FRMD5	ENSOCUG00000000664	110.29	188.117	32.4639	0.172573	-2.53472	6.28812	0.00127783	0.211162	2.89353	Uncharacterized protein [Source:UniProtKB/TrEMBL;Acc:G1SDT2]	#	CHP2	ENSOCUG00000000793	160.397	50.6101	270.183	5.33852	2.41644	6.86957	0.000670357	0.144167	3.17369	calcineurin-like EF-hand protein 2 [Source:HGNC Symbol;Acc:HGNC:24927]	#		ENSOCUG00000000014	14678.9	15826.6	13531.1	0.854959	-0.226072	13.837	0.657012	1	0.182426
GEM	ENSOCUG00000001030	926.426	1426.63	426.219	0.298759	-1.74295	9.60692	0.00165411	0.247554	2.78144	GTP binding protein overexpressed in skeletal muscle [Source:HGNC Symbol;Acc:HGNC:4234]	#	CD82	ENSOCUG00000000861	475.699	297.931	653.466	2.19334	1.13313	8.7854	0.0481948	1	1.317	CD82 molecule [Source:HGNC Symbol;Acc:HGNC:6210]	#		ENSOCUG00000000015	418.478	452.626	384.33	0.849111	-0.235975	8.70419	0.684541	1	0.1646
IBSP	ENSOCUG00000001046	993.08	1780.9	205.255	0.115253	-3.11712	9.23983	9.18304e-08	9.71199e-05	7.03701	integrin-binding sialoprotein [Source:HGNC Symbol;Acc:HGNC:5341]	#	L1CAM	ENSOCUG00000001102	1348.58	784.935	1912.23	2.43616	1.28461	10.2587	0.0167097	1	1.77703	Oryctolagus cuniculus L1 cell adhesion molecule (L1CAM), mRNA. [Source:RefSeq mRNA;Acc:NM_001171365]	#		ENSOCUG00000000016	9.00958	8.59417	9.42499	1.09667	0.133132	3.16993	1	1	0
COL10A1	ENSOCUG00000001188	152.427	226.313	78.5416	0.347048	-1.52679	7.05878	0.0281028	1	1.55125	collagen, type X, alpha 1 [Source:HGNC Symbol;Acc:HGNC:2185]	#	TGM3	ENSOCUG00000001114	2080.97	1286.26	2875.67	2.23568	1.16071	10.9093	0.0278145	1	1.55573	transglutaminase 3 [Source:HGNC Symbol;Acc:HGNC:11779]	#		ENSOCUG00000000017	200.334	145.146	255.522	1.76045	0.815942	7.58933	0.206752	1	0.684551
JUN	ENSOCUG00000001212	3426.64	5435.34	1417.94	0.260874	-1.93858	11.4389	0.000279603	0.0764763	3.55346	jun proto-oncogene [Source:HGNC Symbol;Acc:HGNC:6204]	#	ELL3	ENSOCUG00000001158	132.984	54.4298	211.539	3.88645	1.95845	6.74555	0.00711022	0.686687	2.14812	Oryctolagus cuniculus elongation factor RNA polymerase II-like 3 (ELL3), mRNA. [Source:RefSeq mRNA;Acc:NM_001171316]	#		ENSOCUG00000000018	138.839	117.454	160.225	1.36415	0.448005	7.09995	0.524302	1	0.280419
NES	ENSOCUG00000001454	1241.24	1759.9	722.583	0.410583	-1.28426	10.1391	0.0171549	1	1.76561	nestin [Source:HGNC Symbol;Acc:HGNC:7756]	#	XDH	ENSOCUG00000001230	1300.57	543.343	2057.79	3.78728	1.92116	10.0463	0.000451905	0.116802	3.34495	xanthine dehydrogenase [Source:HGNC Symbol;Acc:HGNC:12805]	#		ENSOCUG00000000020	30.094	38.1963	21.9916	0.575753	-0.796479	4.85712	0.513853	1	0.289161
PLOD2	ENSOCUG00000001461	41.4765	73.5279	9.42499	0.128182	-2.96373	4.71836	0.00882474	0.760846	2.0543	procollagen-lysine, 2-oxoglutarate 5-dioxygenase 2 [Source:HGNC Symbol;Acc:HGNC:9082]	#	SEMA4A	ENSOCUG00000001326	486.51	301.751	671.269	2.22458	1.15353	8.81398	0.0439179	1	1.35736	sema domain, immunoglobulin domain (Ig), transmembrane domain (TM) and short cytoplasmic domain, (semaphorin) 4A [Source:HGNC Symbol;Acc:HGNC:10729]	#		ENSOCUG00000000021	421.835	437.348	406.322	0.929058	-0.106159	8.71956	0.85736	1	0.0668367
ADAMTS6	ENSOCUG00000001525	226.77	345.677	107.864	0.312036	-1.68021	7.59317	0.00916984	0.771773	2.03764	ADAM metallopeptidase with thrombospondin type 1 motif, 6 [Source:HGNC Symbol;Acc:HGNC:222]	#	UCHL1	ENSOCUG00000001353	66.376	13.3687	119.383	8.93004	3.15867	5.32012	0.000908002	0.171483	3.04191	ubiquitin carboxyl-terminal esterase L1 (ubiquitin thiolesterase) [Source:HGNC Symbol;Acc:HGNC:12513]	#		ENSOCUG00000000022	197.625	179.523	215.728	1.20167	0.265044	7.62054	0.686118	1	0.163601
ZFHX4	ENSOCUG00000001723	297.386	455.491	139.28	0.305781	-1.70943	7.97656	0.00565643	0.571552	2.24746	zinc finger homeobox 4 [Source:HGNC Symbol;Acc:HGNC:30939]	#	ABTB2	ENSOCUG00000001405	168.407	90.7163	246.097	2.71282	1.43979	7.22319	0.0335132	1	1.47478	ankyrin repeat and BTB (POZ) domain containing 2 [Source:HGNC Symbol;Acc:HGNC:23842]	#		ENSOCUG00000000023	91.081	76.3927	105.769	1.38455	0.469415	6.49007	0.553887	1	0.256579
DKK2	ENSOCUG00000001765	53.4892	84.9868	21.9916	0.258765	-1.95028	5.43403	0.0440461	1	1.35609	dickkopf WNT signaling pathway inhibitor 2 [Source:HGNC Symbol;Acc:HGNC:2892]	#	IFNLR1	ENSOCUG00000001490	701.796	419.205	984.388	2.34823	1.23157	9.3273	0.0267119	1	1.57329	interferon, lambda receptor 1 [Source:HGNC Symbol;Acc:HGNC:18584]	#		ENSOCUG00000000024	84.2294	109.814	58.6444	0.534032	-0.905003	6.32642	0.261828	1	0.581983
MEPE	ENSOCUG00000001850	19.2366	35.3316	3.14166	0.0889193	-3.49136	3.39721	0.0382793	1	1.41704	matrix extracellular phosphoglycoprotein [Source:HGNC Symbol;Acc:HGNC:13361]	#	ARG1	ENSOCUG00000001813	46.7716	18.1433	75.3999	4.15581	2.05513	5.20893	0.0439397	1	1.35714	Arginase-1 [Source:UniProtKB/Swiss-Prot;Acc:Q95KM0]	#		ENSOCUG00000000025	1196.05	961.593	1430.5	1.48764	0.573026	10.1958	0.282516	1	0.548957
CXCR4	ENSOCUG00000001923	76.8383	132.732	20.9444	0.157795	-2.66388	5.72043	0.00257833	0.335268	2.58866	Uncharacterized protein [Source:UniProtKB/TrEMBL;Acc:G1SGF1]	#	KIF17	ENSOCUG00000001822	76.4025	33.4218	119.383	3.57202	1.83674	5.98109	0.0303076	1	1.51845	kinesin family member 17 [Source:HGNC Symbol;Acc:HGNC:19167]	#		ENSOCUG00000000028	1360.65	1434.27	1287.03	0.897343	-0.156268	10.408	0.76867	1	0.11426
PTPRJ	ENSOCUG00000001933	63.2229	100.265	26.1805	0.261112	-1.93726	5.67905	0.0334175	1	1.47603	protein tyrosine phosphatase, receptor type, J [Source:HGNC Symbol;Acc:HGNC:9673]	#	DDB2	ENSOCUG00000002076	454.153	277.878	630.427	2.26872	1.18188	8.70925	0.0404923	1	1.39263	damage-specific DNA binding protein 2, 48kDa [Source:HGNC Symbol;Acc:HGNC:2718]	#		ENSOCUG00000000030	108.054	126.048	90.061	0.714498	-0.484997	6.73533	0.519444	1	0.284461
NDNF	ENSOCUG00000002038	744.809	1067.59	422.03	0.395312	-1.33894	9.39067	0.0158813	1	1.79911	neuron-derived neurotrophic factor [Source:HGNC Symbol;Acc:HGNC:26256]	#	SERHL2	ENSOCUG00000002177	56.9207	24.8276	89.0138	3.58527	1.84208	5.55492	0.0497375	1	1.30332	serine hydrolase-like 2 [Source:HGNC Symbol;Acc:HGNC:29446]	#		ENSOCUG00000000031	2.00213	1.90982	2.09444	1.09667	0.133132	1	1	1	0
PPP1R10	ENSOCUG00000002132	285.636	460.266	111.005	0.241177	-2.05184	7.8204	0.00111402	0.196365	2.95311	protein phosphatase 1, regulatory subunit 10 [Source:HGNC Symbol;Acc:HGNC:9284]	#	IRF7	ENSOCUG00000002339	362.241	218.674	505.808	2.31307	1.20981	8.37754	0.0411434	1	1.3857	interferon regulatory factor 7 [Source:HGNC Symbol;Acc:HGNC:6122]	#		ENSOCUG00000000032	10.1491	6.68436	13.6139	2.03668	1.02622	3.2539	0.649002	1	0.187754
PTN	ENSOCUG00000002203	7579.48	10373.2	4785.8	0.461363	-1.11602	12.7826	0.0307969	1	1.51149	pleiotrophin [Source:HGNC Symbol;Acc:HGNC:9630]	#	PVRL4	ENSOCUG00000002367	954.445	565.306	1343.58	2.37674	1.24898	9.76738	0.0219861	1	1.65785	poliovirus receptor-related 4 [Source:HGNC Symbol;Acc:HGNC:19688]	#		ENSOCUG00000000034	168.303	179.523	157.083	0.875004	-0.192638	7.3917	0.779768	1	0.108035
UST	ENSOCUG00000002243	414.727	584.404	245.05	0.419316	-1.25389	8.56388	0.03179	1	1.49771	uronyl-2-sulfotransferase [Source:HGNC Symbol;Acc:HGNC:17223]	#	MAP3K6	ENSOCUG00000002379	889.626	573.9	1205.35	2.10028	1.07058	9.69995	0.049635	1	1.30421	mitogen-activated protein kinase kinase kinase 6 [Source:HGNC Symbol;Acc:HGNC:6858]	#		ENSOCUG00000000038	54.7498	37.2414	72.2583	1.94027	0.956254	5.69696	0.306658	1	0.513346
PKD2	ENSOCUG00000002396	629.682	860.372	398.991	0.463743	-1.1086	9.19452	0.0474332	1	1.32392	polycystic kidney disease 2 (autosomal dominant) [Source:HGNC Symbol;Acc:HGNC:9009]	#	HBQ1_1	ENSOCUG00000002435	193.217	97.4006	289.033	2.96747	1.56923	7.39047	0.0175904	1	1.75472	Oryctolagus cuniculus theta 1 globin (HBQ1_1), mRNA. [Source:RefSeq mRNA;Acc:NM_001171416]	#		ENSOCUG00000000040	88.9404	77.3476	100.533	1.29976	0.378245	6.46241	0.638547	1	0.194807
SAA3	ENSOCUG00000002424	544.9	794.484	295.316	0.371709	-1.42776	8.92	0.0123361	0.912876	1.90882	Oryctolagus cuniculus serum amyloid A3 pseudogene (SAA3P), mRNA. [Source:RefSeq mRNA;Acc:NM_001082302]	#	RLA-DQA	ENSOCUG00000002480	866.301	384.828	1347.77	3.50227	1.80829	9.49222	0.00117032	0.199634	2.9317	Uncharacterized protein [Source:UniProtKB/TrEMBL;Acc:G1SHN0]	#		ENSOCUG00000000051	82.7191	86.8966	78.5416	0.903851	-0.145844	6.36831	0.870398	1	0.0602819
EMILIN2	ENSOCUG00000002553	535.782	777.295	294.269	0.378581	-1.40133	8.90166	0.0141266	0.973398	1.84996	elastin microfibril interfacer 2 [Source:HGNC Symbol;Acc:HGNC:19881]	#	NKIRAS1	ENSOCUG00000002483	470.307	257.825	682.788	2.64826	1.40504	8.71277	0.0150524	0.994965	1.82239	NFKB inhibitor interacting Ras-like 1 [Source:HGNC Symbol;Acc:HGNC:17899]	#		ENSOCUG00000000055	5.6674	1.90982	9.42499	4.93502	2.30306	2.08496	0.489264	1	0.310457
KRT75	ENSOCUG00000002622	33.129	62.069	4.18888	0.0674875	-3.88924	4.01118	0.0036349	0.417855	2.43951	keratin 75 [Source:HGNC Symbol;Acc:HGNC:24431]	#	RLA-DQB	ENSOCUG00000002485	1211.83	505.146	1918.51	3.79793	1.92521	9.94316	0.000458627	0.116802	3.33854	Uncharacterized protein [Source:UniProtKB/TrEMBL;Acc:G1SHN5]	#		ENSOCUG00000000057	3266.73	3067.17	3466.3	1.13013	0.176491	11.6709	0.73275	1	0.135044
AKAP12	ENSOCUG00000002673	1146.71	1798.09	495.336	0.275478	-1.85999	9.88226	0.000718556	0.149989	3.14354	A kinase (PRKA) anchor protein 12 [Source:HGNC Symbol;Acc:HGNC:370]	#	PODN	ENSOCUG00000002562	1479.63	911.937	2047.32	2.24502	1.16673	10.4162	0.0287305	1	1.54166	podocan [Source:HGNC Symbol;Acc:HGNC:23174]	#		ENSOCUG00000000059	172.275	162.334	182.216	1.12248	0.166685	7.42617	0.80891	1	0.0921
FAM64A	ENSOCUG00000002818	47.0977	76.3927	17.8028	0.233043	-2.10133	5.2047	0.0401563	1	1.39625	family with sequence similarity 64, member A [Source:HGNC Symbol;Acc:HGNC:25483]	#	KRT85	ENSOCUG00000002607	15.1385	0.954908	29.3222	30.7068	4.94049	2.40368	0.0228813	1	1.64052	keratin 85 [Source:HGNC Symbol;Acc:HGNC:6462]	#		ENSOCUG00000000060	417.999	419.205	416.794	0.994249	-0.00832048	8.70735	0.993243	1	0.00294468
DUSP6	ENSOCUG00000002902	227.264	357.136	97.3916	0.272702	-1.8746	7.54303	0.00387489	0.435966	2.41174	dual specificity phosphatase 6 [Source:HGNC Symbol;Acc:HGNC:3072]	#	ILVBL	ENSOCUG00000002715	691.787	442.123	941.452	2.12939	1.09044	9.33352	0.0493306	1	1.30688	ilvB (bacterial acetolactate synthase)-like [Source:HGNC Symbol;Acc:HGNC:6041]	#		ENSOCUG00000000061	4.43556	5.72945	3.14166	0.548336	-0.866868	2.08496	0.866108	1	0.062428
CPNE4	ENSOCUG00000002956	299.818	426.844	172.791	0.404812	-1.30468	8.08523	0.0323648	1	1.48993	copine IV [Source:HGNC Symbol;Acc:HGNC:2317]	#	-	ENSOCUG00000002771	379.012	229.178	528.847	2.30758	1.20638	8.44352	0.040576	1	1.39173	-	#		ENSOCUG00000000063	65.4385	54.4298	76.4471	1.40451	0.490067	6.01136	0.581151	1	0.235711
LYN	ENSOCUG00000003056	209.658	298.886	120.43	0.402931	-1.3114	7.56775	0.0426658	1	1.36992	LYN proto-oncogene, Src family tyrosine kinase [Source:HGNC Symbol;Acc:HGNC:6735]	#	PITPNM3	ENSOCUG00000002824	406.56	157.56	655.56	4.16071	2.05683	8.32817	0.000604631	0.137027	3.21851	PITPNM family member 3 [Source:HGNC Symbol;Acc:HGNC:21043]	#		ENSOCUG00000000064	237.961	222.494	253.427	1.13903	0.187809	7.89152	0.768391	1	0.114418
NUSAP1	ENSOCUG00000003277	132.575	192.891	72.2583	0.374606	-1.41655	6.88337	0.0480124	1	1.31865	nucleolar and spindle associated protein 1 [Source:HGNC Symbol;Acc:HGNC:18538]	#	TNS4	ENSOCUG00000002830	304.919	180.478	429.361	2.37902	1.25037	8.12086	0.0393496	1	1.40506	tensin 4 [Source:HGNC Symbol;Acc:HGNC:24352]	#		ENSOCUG00000000065	74.5721	82.1221	67.0221	0.816128	-0.293133	6.21313	0.736273	1	0.132961
ELMO1	ENSOCUG00000003285	653.063	929.126	377	0.405757	-1.30131	9.20907	0.0201538	1	1.69564	engulfment and cell motility 1 [Source:HGNC Symbol;Acc:HGNC:16286]	#	FBLN7	ENSOCUG00000002898	373.402	139.417	607.388	4.35664	2.12322	8.18487	0.000473388	0.116802	3.32478	fibulin 7 [Source:HGNC Symbol;Acc:HGNC:26740]	#		ENSOCUG00000000066	23.4096	24.8276	21.9916	0.885773	-0.17499	4.54638	0.928764	1	0.0320946
FAM3C	ENSOCUG00000003351	378.272	526.154	230.389	0.437873	-1.19142	8.44363	0.0432726	1	1.36379	family with sequence similarity 3, member C [Source:HGNC Symbol;Acc:HGNC:18664]	#	COL17A1	ENSOCUG00000003049	7850.2	3960	11740.4	2.96474	1.56791	12.7352	0.00268627	0.338214	2.57085	collagen, type XVII, alpha 1 [Source:HGNC Symbol;Acc:HGNC:2194]	#		ENSOCUG00000000068	346.429	307.48	385.377	1.25334	0.325777	8.42724	0.5826	1	0.234629
LHX8	ENSOCUG00000003641	20.7152	37.2414	4.18888	0.112479	-3.15227	3.6427	0.0460072	1	1.33717	LIM homeobox 8 [Source:HGNC Symbol;Acc:HGNC:28838]	#	ALDH5A1	ENSOCUG00000003063	351.522	212.945	490.099	2.30154	1.2026	8.33563	0.0431225	1	1.3653	aldehyde dehydrogenase 5 family, member A1 [Source:HGNC Symbol;Acc:HGNC:408]	#		ENSOCUG00000000069	4476.17	4477.56	4474.78	0.999377	-0.000898929	12.128	0.999122	1	0.000381508
-	ENSOCUG00000003660	16.8032	31.512	2.09444	0.066465	-3.91126	3.0222	0.0372905	1	1.4284	Uncharacterized protein [Source:UniProtKB/TrEMBL;Acc:G1SK57]	#	MFSD6	ENSOCUG00000003405	445.867	275.968	615.766	2.23129	1.15788	8.6873	0.0450448	1	1.34636	major facilitator superfamily domain containing 6 [Source:HGNC Symbol;Acc:HGNC:24711]	#		ENSOCUG00000000070	59.1249	65.8887	52.3611	0.79469	-0.331536	5.87619	0.726297	1	0.138886
CCR5	ENSOCUG00000003665	47.6372	86.8966	8.37777	0.0964107	-3.37466	4.7539	0.00217365	0.29985	2.66281	Oryctolagus cuniculus chemokine (C-C motif) receptor 5 (CCR5), mRNA. [Source:RefSeq mRNA;Acc:NM_001171125]	#	SPTBN4	ENSOCUG00000003436	290.5	88.8065	492.194	5.54232	2.47049	7.70784	0.000107755	0.0379871	3.96756	spectrin, beta, non-erythrocytic 4 [Source:HGNC Symbol;Acc:HGNC:14896]	#		ENSOCUG00000000071	115.645	77.3476	153.941	1.99026	0.992954	6.76976	0.176393	1	0.753518
LIF	ENSOCUG00000003768	285.634	427.799	143.469	0.335366	-1.57619	7.95269	0.0108617	0.836457	1.9641	leukemia inhibitory factor [Source:HGNC Symbol;Acc:HGNC:6596]	#	ANK3	ENSOCUG00000003521	380.367	211.99	548.744	2.58854	1.37214	8.41392	0.0202939	1	1.69263	ankyrin 3, node of Ranvier (ankyrin G) [Source:HGNC Symbol;Acc:HGNC:494]	#		ENSOCUG00000000072	15.4934	15.2785	15.7083	1.02813	0.0400226	3.95345	1	1	0
THBS1	ENSOCUG00000003792	2804.82	3827.27	1782.37	0.465703	-1.10252	11.3508	0.0351504	1	1.45407	thrombospondin 1 [Source:HGNC Symbol;Acc:HGNC:11785]	#	-	ENSOCUG00000003679	76.1702	5.72945	146.611	25.589	4.67745	4.85712	4.27175e-06	0.00282363	5.36939	Oryctolagus cuniculus glutathione S-transferase alpha I (LOC100328910), mRNA. [Source:RefSeq mRNA;Acc:NM_001171097]	#		ENSOCUG00000000073	855.309	796.393	914.224	1.14796	0.199066	9.73687	0.714554	1	0.145965
-	ENSOCUG00000003824	199.602	290.292	108.911	0.375177	-1.41436	7.47418	0.030782	1	1.5117	Uncharacterized protein [Source:UniProtKB/TrEMBL;Acc:G1SKH4]	#	KY	ENSOCUG00000003806	114.55	45.8356	183.264	3.99828	1.99938	6.51809	0.00828023	0.738351	2.08196	kyphoscoliosis peptidase [Source:HGNC Symbol;Acc:HGNC:26576]	#		ENSOCUG00000000074	551.803	543.343	560.263	1.03114	0.0442423	9.10784	0.940389	1	0.0266924
FBN1	ENSOCUG00000003866	14178.2	19002.7	9353.78	0.492235	-1.02258	13.7026	0.0466197	1	1.33143	fibrillin 1 [Source:HGNC Symbol;Acc:HGNC:3603]	#	GNMT	ENSOCUG00000003858	12.5205	0.954908	24.0861	25.2235	4.65669	2.26178	0.0479864	1	1.31888	glycine N-methyltransferase [Source:HGNC Symbol;Acc:HGNC:4415]	#		ENSOCUG00000000075	491.309	516.605	466.013	0.902068	-0.148691	8.93857	0.795687	1	0.099258
CYR61	ENSOCUG00000003905	4823.19	6592.69	3053.7	0.463195	-1.11031	12.1315	0.0323982	1	1.48948	cysteine-rich, angiogenic inducer, 61 [Source:HGNC Symbol;Acc:HGNC:2654]	#	FAM135B	ENSOCUG00000004004	24.5635	0.954908	48.1722	50.4469	5.65669	2.76178	0.00173178	0.256756	2.76151	family with sequence similarity 135, member B [Source:HGNC Symbol;Acc:HGNC:28029]	#		ENSOCUG00000000076	607.587	635.014	580.16	0.913618	-0.130336	9.24548	0.816863	1	0.0878507
CD163	ENSOCUG00000003958	341.124	482.229	200.019	0.414781	-1.26958	8.27878	0.0338617	1	1.47029	CD163 molecule [Source:HGNC Symbol;Acc:HGNC:1631]	#	CNDP1	ENSOCUG00000004008	59.3844	17.1883	101.58	5.90984	2.56312	5.38492	0.0073283	0.690112	2.135	carnosine dipeptidase 1 (metallopeptidase M20 family) [Source:HGNC Symbol;Acc:HGNC:20675]	#		ENSOCUG00000000077	37.8399	29.6022	46.0777	1.55657	0.638367	5.20681	0.562794	1	0.24965
TWIST2	ENSOCUG00000004073	257.418	372.414	142.422	0.382429	-1.38674	7.8474	0.0266203	1	1.57479	twist family bHLH transcription factor 2 [Source:HGNC Symbol;Acc:HGNC:20670]	#	LAMB3	ENSOCUG00000004013	674.121	406.791	941.452	2.31434	1.2106	9.27344	0.0298155	1	1.52556	laminin, beta 3 [Source:HGNC Symbol;Acc:HGNC:6490]	#		ENSOCUG00000000080	133.126	116.499	149.753	1.28544	0.362266	7.0453	0.6123	1	0.213036
FNDC3B	ENSOCUG00000004185	651.401	963.502	339.3	0.352152	-1.50573	9.15928	0.00751148	0.700954	2.12427	fibronectin type III domain containing 3B [Source:HGNC Symbol;Acc:HGNC:24670]	#	IRF6	ENSOCUG00000004035	1044.14	605.412	1482.87	2.44935	1.2924	9.88797	0.0173527	1	1.76063	interferon regulatory factor 6 [Source:HGNC Symbol;Acc:HGNC:6121]	#		ENSOCUG00000000081	2711.51	2908.65	2514.38	0.864448	-0.210149	11.4011	0.685431	1	0.164036
PRSS35	ENSOCUG00000004205	3194.59	4624.62	1764.57	0.381559	-1.39002	11.4801	0.00817194	0.738351	2.08767	protease, serine, 35 [Source:HGNC Symbol;Acc:HGNC:21387]	#	GDF10	ENSOCUG00000004152	33.4188	1.90982	64.9277	33.9968	5.08733	3.4771	0.000536612	0.125188	3.27034	growth differentiation factor 10 [Source:HGNC Symbol;Acc:HGNC:4215]	#		ENSOCUG00000000083	3.5268	2.86472	4.18888	1.46223	0.54817	1.79248	0.969829	1	0.0133048
BACH2	ENSOCUG00000004231	103.853	180.478	27.2277	0.150865	-2.72867	6.13134	0.000742184	0.150647	3.12949	BTB and CNC homology 1, basic leucine zipper transcription factor 2 [Source:HGNC Symbol;Acc:HGNC:14078]	#	-	ENSOCUG00000004197	162.922	52.52	273.325	5.20421	2.37968	6.90463	0.000759693	0.150647	3.11936	Uncharacterized protein [Source:UniProtKB/TrEMBL;Acc:G1SLA0]	#		ENSOCUG00000000085	247.295	256.87	237.719	0.925444	-0.111782	7.94901	0.862903	1	0.0640382
CCNB1	ENSOCUG00000004340	156.478	229.178	83.7777	0.365557	-1.45183	7.11441	0.0352764	1	1.45252	cyclin B1 [Source:HGNC Symbol;Acc:HGNC:1579]	#	SLC22A3	ENSOCUG00000004222	37.8543	7.63927	68.0694	8.91046	3.1555	4.51118	0.00764074	0.701847	2.11686	solute carrier family 22 (organic cation transporter), member 3 [Source:HGNC Symbol;Acc:HGNC:10967]	#		ENSOCUG00000000086	835.813	809.762	861.863	1.06434	0.0899602	9.70633	0.870255	1	0.0603536
NFAT5	ENSOCUG00000004386	154.353	240.637	68.0694	0.282872	-1.82178	6.99982	0.00929018	0.775681	2.03198	nuclear factor of activated T-cells 5, tonicity-responsive [Source:HGNC Symbol;Acc:HGNC:7774]	#	-	ENSOCUG00000004238	12253.9	6947.91	17559.8	2.52735	1.33763	13.4312	0.00978935	0.796402	2.00925	Uncharacterized protein [Source:UniProtKB/TrEMBL;Acc:G1SLD2]	#		ENSOCUG00000000087	50.7615	43.9258	57.5972	1.31124	0.39093	5.65246	0.695033	1	0.157995
BTG2	ENSOCUG00000004422	298.403	466.95	129.855	0.278093	-1.84636	7.94394	0.00292095	0.364866	2.53448	BTG family, member 2 [Source:HGNC Symbol;Acc:HGNC:1131]	#	C5orf46	ENSOCUG00000004369	178.046	75.4377	280.655	3.72036	1.89544	7.18493	0.00527773	0.540167	2.27755	chromosome 5 open reading frame 46 [Source:HGNC Symbol;Acc:HGNC:33768]	#		ENSOCUG00000000090	913.819	896.659	930.98	1.03828	0.0541903	9.83551	0.922005	1	0.0352666
-	ENSOCUG00000004424	369.633	542.388	196.878	0.362983	-1.46203	8.35217	0.0140492	0.973257	1.85235	Uncharacterized protein [Source:UniProtKB/TrEMBL;Acc:G1SLS7]	#	-	ENSOCUG00000004373	396.03	245.411	546.649	2.22748	1.15541	8.51677	0.0484057	1	1.3151	Uncharacterized protein [Source:UniProtKB/TrEMBL;Acc:G1SLN3]	#		ENSOCUG00000000091	12.6749	8.59417	16.7555	1.94964	0.963207	3.58496	0.62204	1	0.206182
AF1Q	ENSOCUG00000004821	16.8032	31.512	2.09444	0.066465	-3.91126	3.0222	0.0372905	1	1.4284	AF1q; Uncharacterized protein [Source:UniProtKB/TrEMBL;Acc:E2J6N2]	#	MLXIPL	ENSOCUG00000004554	301.731	181.433	422.03	2.3261	1.21791	8.11225	0.04491	1	1.34766	MLX interacting protein-like [Source:HGNC Symbol;Acc:HGNC:12744]	#		ENSOCUG00000000092	13700.6	12601.9	14799.3	1.17437	0.231888	13.7373	0.648849	1	0.187857
PALLD	ENSOCUG00000004900	1579.54	2170.51	988.577	0.455459	-1.13461	10.5165	0.0329253	1	1.48247	palladin, cytoskeletal associated protein [Source:HGNC Symbol;Acc:HGNC:17068]	#	AQP2	ENSOCUG00000004635	65.2523	25.7825	104.722	4.06175	2.0221	5.69937	0.0247547	1	1.60634	Aquaporin-2 [Source:UniProtKB/Swiss-Prot;Acc:P79213]	#		ENSOCUG00000000093	97.011	94.5359	99.486	1.05236	0.073631	6.59961	0.937608	1	0.0279788
SERPINB9	ENSOCUG00000005091	22.6711	40.1061	5.23611	0.130556	-2.93726	3.85712	0.0482157	1	1.31681	serpin peptidase inhibitor, clade B (ovalbumin), member 9 [Source:HGNC Symbol;Acc:HGNC:8955]	#	PROM2	ENSOCUG00000004691	1280.24	823.131	1737.34	2.11065	1.07769	10.2238	0.0441769	1	1.3548	prominin 2 [Source:HGNC Symbol;Acc:HGNC:20685]	#		ENSOCUG00000000094	36.823	18.1433	55.5027	3.05914	1.61312	4.98792	0.145315	1	0.837689
MKI67	ENSOCUG00000005133	645.961	891.884	400.038	0.448532	-1.15672	9.22235	0.0384038	1	1.41563	marker of proliferation Ki-67 [Source:HGNC Symbol;Acc:HGNC:7107]	#	CLCA2	ENSOCUG00000004727	417.344	237.772	596.916	2.51045	1.32795	8.55741	0.0230221	1	1.63785	chloride channel accessory 2 [Source:HGNC Symbol;Acc:HGNC:2016]	#		ENSOCUG00000000095	128.431	159.47	97.3916	0.610722	-0.711413	6.96143	0.319535	1	0.495482
-	ENSOCUG00000005244	44.911	78.3025	11.5194	0.147115	-2.76499	4.90849	0.0105864	0.827306	1.97525	-	#	F3	ENSOCUG00000004834	2903.69	1467.69	4339.68	2.9568	1.56404	11.3014	0.00310502	0.382391	2.50794	Oryctolagus cuniculus coagulation factor III (thromboplastin, tissue factor) (F3), mRNA. [Source:RefSeq mRNA;Acc:NM_001082291]	#		ENSOCUG00000000097	481.081	457.401	504.761	1.10354	0.14214	8.90839	0.805082	1	0.09416
TGFB2	ENSOCUG00000005279	151.087	221.539	80.636	0.363982	-1.45806	7.06238	0.0359865	1	1.44386	Oryctolagus cuniculus transforming growth factor, beta 2 (TGFB2), mRNA. [Source:RefSeq mRNA;Acc:NM_001082660]	#	PHYHD1	ENSOCUG00000004894	102.645	42.9709	162.319	3.77743	1.9174	6.38399	0.0136966	0.9657	1.86339	phytanoyl-CoA dioxygenase domain containing 1 [Source:HGNC Symbol;Acc:HGNC:23396]	#		ENSOCUG00000000098	5.43662	6.68436	4.18888	0.62667	-0.674223	2.40368	0.88347	1	0.0538081
RHOJ	ENSOCUG00000005357	307.102	427.799	186.405	0.435731	-1.19849	8.14154	0.0479797	1	1.31894	ras homolog family member J [Source:HGNC Symbol;Acc:HGNC:688]	#	-	ENSOCUG00000004985	41.674	15.2785	68.0694	4.45523	2.1555	5.01118	0.0445822	1	1.35084	Uncharacterized protein [Source:UniProtKB/TrEMBL;Acc:G1SMY3]	#		ENSOCUG00000000100	931.362	945.359	917.366	0.970389	-0.0433656	9.86304	0.937943	1	0.0278235
LPXN	ENSOCUG00000005377	42.955	75.4377	10.4722	0.138819	-2.84872	4.81285	0.0100877	0.804178	1.99621	leupaxin [Source:RefSeq peptide;Acc:NP_001075517]	#	IL17RE	ENSOCUG00000005311	364.624	126.048	603.199	4.78548	2.25866	8.10716	0.00022682	0.0654233	3.64432	interleukin 17 receptor E [Source:HGNC Symbol;Acc:HGNC:18439]	#		ENSOCUG00000000101	15.6478	22.9178	8.37777	0.365557	-1.45183	3.79248	0.392095	1	0.406609
GREM1	ENSOCUG00000005596	1208.85	1682.55	735.149	0.436926	-1.19454	10.1192	0.0264931	1	1.57687	gremlin 1, DAN family BMP antagonist [Source:HGNC Symbol;Acc:HGNC:2001]	#	SYT13	ENSOCUG00000005321	25.8574	6.68436	45.0305	6.7367	2.75204	4.11681	0.04419	1	1.35468	synaptotagmin XIII [Source:HGNC Symbol;Acc:HGNC:14962]	#		ENSOCUG00000000102	63.3281	43.9258	82.7305	1.88341	0.913351	5.91367	0.302883	1	0.518724
STC1	ENSOCUG00000005708	199.742	319.894	79.5888	0.248797	-2.00696	7.31797	0.0026704	0.338214	2.57342	stanniocalcin 1 [Source:HGNC Symbol;Acc:HGNC:11373]	#	RAB25	ENSOCUG00000005634	945.588	531.884	1359.29	2.55562	1.35367	9.7318	0.0133236	0.96244	1.87538	RAB25, member RAS oncogene family [Source:HGNC Symbol;Acc:HGNC:18238]	#		ENSOCUG00000000103	58.5695	44.8807	72.2583	1.61001	0.687068	5.83156	0.453282	1	0.343631
MIB1	ENSOCUG00000005755	111.783	168.064	55.5027	0.330248	-1.59838	6.59368	0.0337656	1	1.47153	mindbomb E3 ubiquitin protein ligase 1 [Source:HGNC Symbol;Acc:HGNC:21086]	#	HMGCS2	ENSOCUG00000005767	65.5134	9.54908	121.478	12.7214	3.66918	5.08995	0.000212261	0.0623576	3.67313	3-hydroxy-3-methylglutaryl-CoA synthase 2 (mitochondrial) [Source:HGNC Symbol;Acc:HGNC:5008]	#		ENSOCUG00000000105	766.648	778.25	755.046	0.970185	-0.0436688	9.58226	0.938706	1	0.0274706
IGSF10	ENSOCUG00000005885	2688.11	4335.28	1040.94	0.240108	-2.05824	11.0528	0.000131285	0.0452763	3.88178	immunoglobulin superfamily, member 10 [Source:HGNC Symbol;Acc:HGNC:26384]	#	LTBP4	ENSOCUG00000005827	539.488	332.308	746.669	2.24692	1.16795	8.96035	0.0394417	1	1.40404	latent transforming growth factor beta binding protein 4 [Source:HGNC Symbol;Acc:HGNC:6717]	#		ENSOCUG00000000107	85.7828	66.8436	104.722	1.56667	0.647705	6.38657	0.419602	1	0.377162
FHL1	ENSOCUG00000006034	1156.08	1604.25	707.921	0.44128	-1.18023	10.0576	0.0286301	1	1.54318	four and a half LIM domains 1 [Source:HGNC Symbol;Acc:HGNC:3702]	#	-	ENSOCUG00000005907	2245	687.534	3802.46	5.53058	2.46743	10.659	6.91291e-06	0.00406172	5.16034	Uncharacterized protein [Source:UniProtKB/TrEMBL;Acc:G1TRN5]	#		ENSOCUG00000000108	39.8882	30.5571	49.2194	1.61074	0.687721	5.27729	0.521725	1	0.282558
SECISBP2L	ENSOCUG00000006443	126.183	184.297	68.0694	0.369345	-1.43696	6.80741	0.0477136	1	1.32136	SECIS binding protein 2-like [Source:HGNC Symbol;Acc:HGNC:28997]	#	SLC2A1	ENSOCUG00000005924	1651.51	974.006	2329.02	2.39117	1.25772	10.5566	0.0181749	1	1.74053	Oryctolagus cuniculus solute carrier family 2 (facilitated glucose transporter), member 1 (SLC2A1), mRNA. [Source:RefSeq mRNA;Acc:NM_001105687]	#		ENSOCUG00000000109	552.952	736.234	369.669	0.502108	-0.993931	9.02706	0.0781061	1	1.10731
-	ENSOCUG00000006462	1208.43	1972.84	444.022	0.225067	-2.15157	9.87027	0.000103617	0.0373585	3.98457	Uncharacterized protein [Source:UniProtKB/TrEMBL;Acc:G1SR31]	#	-	ENSOCUG00000005933	92.356	6.68436	178.028	26.6335	4.73517	5.10837	7.92646e-07	0.000739679	6.10092	Uncharacterized protein [Source:UniProtKB/TrEMBL;Acc:G1SPZ4]	#		ENSOCUG00000000111	66.8405	68.7534	64.9277	0.944356	-0.0825967	6.06206	0.942222	1	0.0258469
SLC4A4	ENSOCUG00000006500	21.6239	40.1061	3.14166	0.0783337	-3.67422	3.48864	0.0225547	1	1.64676	Oryctolagus cuniculus solute carrier family 4, sodium bicarbonate cotransporter, member 4 (SLC4A4), mRNA. [Source:RefSeq mRNA;Acc:NM_001082060]	#	FAM180B	ENSOCUG00000006361	175.351	55.3847	295.316	5.33209	2.4147	6.99877	0.000529244	0.125188	3.27634	family with sequence similarity 180, member B [Source:HGNC Symbol;Acc:HGNC:34451]	#		ENSOCUG00000000114	27.5682	36.2865	18.85	0.519476	-0.94487	4.70893	0.455307	1	0.341695
TNF	ENSOCUG00000006698	25.4897	46.7905	4.18888	0.0895242	-3.48158	3.80735	0.0172287	1	1.76375	Oryctolagus cuniculus tumor necrosis factor (TNF), mRNA. [Source:RefSeq mRNA;Acc:NM_001082263]	#	MOCS1	ENSOCUG00000006667	589.847	330.398	849.296	2.57052	1.36206	9.04909	0.0159702	1	1.79669	Uncharacterized protein [Source:UniProtKB/TrEMBL;Acc:G1SRG7]	#		ENSOCUG00000000116	60.6336	56.3396	64.9277	1.15243	0.204685	5.91842	0.83485	1	0.0783914
MEST	ENSOCUG00000006752	124.675	193.846	55.5027	0.286323	-1.80428	6.69663	0.0143481	0.978636	1.84321	mesoderm specific transcript [Source:HGNC Symbol;Acc:HGNC:7028]	#	CES1	ENSOCUG00000006737	200.42	13.3687	387.472	28.9835	4.85716	6.16937	7.05013e-10	9.32027e-07	9.1518	carboxylesterase 1 [Source:HGNC Symbol;Acc:HGNC:1863]	#		ENSOCUG00000000119	12.4902	12.4138	12.5667	1.01231	0.0176548	3.6427	1	1	0
C2	ENSOCUG00000006999	584.728	847.959	321.497	0.379142	-1.39919	9.02826	0.013529	0.96244	1.86873	complement component 2 [Source:HGNC Symbol;Acc:HGNC:1248]	#	SLC6A12	ENSOCUG00000006745	18.2341	1.90982	34.5583	18.0951	4.17753	3.0222	0.0216193	1	1.66516	Oryctolagus cuniculus solute carrier family 6 (neurotransmitter transporter, betaine/GABA), member 12 (SLC6A12), mRNA. [Source:RefSeq mRNA;Acc:NM_001082350]	#		ENSOCUG00000000120	44.2171	60.1592	28.275	0.470002	-1.08926	5.36608	0.285874	1	0.543825
PENK	ENSOCUG00000007052	2294.77	3568.49	1021.04	0.286127	-1.80527	10.8985	0.000751017	0.150647	3.12435	proenkephalin [Source:HGNC Symbol;Acc:HGNC:8831]	#	-	ENSOCUG00000006826	189.132	8.59417	369.669	43.0139	5.42673	5.81672	7.62679e-11	1.20991e-07	10.1177	Uncharacterized protein [Source:UniProtKB/TrEMBL;Acc:G1U2D5]	#		ENSOCUG00000000121	9.25625	14.3236	4.18888	0.292446	-1.77376	2.95345	0.449691	1	0.347086
C-KIT	ENSOCUG00000007086	247.961	351.406	144.517	0.411252	-1.28191	7.81604	0.041109	1	1.38606	Uncharacterized protein [Source:UniProtKB/TrEMBL;Acc:G1SSC3]	#	EXTL1	ENSOCUG00000006878	1955.37	797.348	3113.39	3.90468	1.9652	10.6217	0.000278348	0.0764763	3.55541	exostosin-like glycosyltransferase 1 [Source:HGNC Symbol;Acc:HGNC:3515]	#		ENSOCUG00000000122	483.008	504.192	461.824	0.91597	-0.126627	8.91451	0.826417	1	0.082801
LRIG1	ENSOCUG00000007510	1966.31	2867.59	1065.02	0.3714	-1.42895	10.7711	0.00722874	0.686687	2.14094	leucine-rich repeats and immunoglobulin-like domains 1 [Source:HGNC Symbol;Acc:HGNC:17360]	#	CDCP1	ENSOCUG00000006910	635.696	367.64	903.752	2.45825	1.29763	9.17097	0.020698	1	1.68407	CUB domain containing protein 1 [Source:HGNC Symbol;Acc:HGNC:24357]	#		ENSOCUG00000000123	92.7918	105.995	79.5888	0.750874	-0.413356	6.52117	0.601914	1	0.220466
CYP26B1	ENSOCUG00000007620	1737.84	2372.95	1102.72	0.464706	-1.10561	10.6597	0.0369392	1	1.43251	cytochrome P450, family 26, subfamily B, polypeptide 1 [Source:HGNC Symbol;Acc:HGNC:20581]	#	CALML4	ENSOCUG00000006974	118.692	46.7905	190.594	4.07335	2.02622	6.56125	0.00697277	0.683452	2.15659	calmodulin-like 4 [Source:HGNC Symbol;Acc:HGNC:18445]	#		ENSOCUG00000000125	183.333	171.883	194.783	1.13323	0.180438	7.51551	0.78957	1	0.10261
ANGPTL2	ENSOCUG00000007685	19088.6	26293.4	11883.9	0.451971	-1.1457	14.1096	0.0260075	1	1.5849	angiopoietin-like 2 [Source:HGNC Symbol;Acc:HGNC:490]	#	SCIN	ENSOCUG00000006986	127.995	60.1592	195.83	3.2552	1.70275	6.76209	0.0192834	1	1.71482	scinderin [Source:HGNC Symbol;Acc:HGNC:21695]	#		ENSOCUG00000000127	134.159	138.462	129.855	0.937844	-0.0925807	7.06705	0.905855	1	0.0429413
NRP2	ENSOCUG00000007978	2308.21	3171.25	1445.17	0.455708	-1.13382	11.0639	0.0311172	1	1.507	neuropilin 2 [Source:HGNC Symbol;Acc:HGNC:8005]	#	-	ENSOCUG00000007039	2102.67	1346.42	2858.91	2.12334	1.08634	10.9381	0.0391389	1	1.40739	Uncharacterized protein [Source:UniProtKB/TrEMBL;Acc:G1SS91]	#		ENSOCUG00000000128	37.2702	30.5571	43.9833	1.43938	0.525449	5.19616	0.640222	1	0.193669
LRRC15	ENSOCUG00000008086	783.11	1087.64	478.58	0.440017	-1.18437	9.4948	0.0316774	1	1.49925	leucine rich repeat containing 15 [Source:HGNC Symbol;Acc:HGNC:20818]	#	FGFR2	ENSOCUG00000007069	1203.72	716.181	1691.26	2.3615	1.2397	10.104	0.0214119	1	1.66935	fibroblast growth factor receptor 2 [Source:RefSeq peptide;Acc:NP_001076157]	#		ENSOCUG00000000129	1542.45	1410.4	1674.51	1.18726	0.247632	10.5857	0.638678	1	0.194718
SMYD3	ENSOCUG00000008229	1459.88	2078.84	840.919	0.404514	-1.30574	10.3687	0.0147655	0.991464	1.83075	SET and MYND domain containing 3 [Source:HGNC Symbol;Acc:HGNC:15513]	#	EPHB6	ENSOCUG00000007545	2796.35	1716.92	3875.77	2.25739	1.17465	11.3329	0.0250177	1	1.60175	EPH receptor B6 [Source:HGNC Symbol;Acc:HGNC:3396]	#		ENSOCUG00000000131	221.222	265.464	176.98	0.666682	-0.58493	7.75991	0.356613	1	0.447803
MMP12	ENSOCUG00000008303	18.7592	34.3767	3.14166	0.0913893	-3.45183	3.37744	0.0425525	1	1.37107	Oryctolagus cuniculus matrix metallopeptidase 12 (macrophage elastase) (MMP12), mRNA. [Source:RefSeq mRNA;Acc:NM_001082771]	#	GPR56	ENSOCUG00000007622	1112.52	685.624	1539.41	2.24528	1.16689	10.0047	0.0306862	1	1.51306	G protein-coupled receptor 56 [Source:HGNC Symbol;Acc:HGNC:4512]	#		ENSOCUG00000000133	504.083	653.157	355.008	0.543526	-0.879579	8.9115	0.121473	1	0.91552
EGR-1	ENSOCUG00000008439	4090.79	5484.99	2696.59	0.491631	-1.02435	11.9091	0.0484966	1	1.31429	Uncharacterized protein [Source:UniProtKB/TrEMBL;Acc:G1SV58]	#	AP1G2	ENSOCUG00000007722	322.459	164.244	480.674	2.92658	1.54922	8.13431	0.0106911	0.831392	1.97098	adaptor-related protein complex 1, gamma 2 subunit [Source:HGNC Symbol;Acc:HGNC:556]	#		ENSOCUG00000000134	87.0465	84.0319	90.061	1.07175	0.0999652	6.44285	0.914214	1	0.0389521
ITM2A	ENSOCUG00000008651	1189.02	1724.56	653.466	0.378917	-1.40005	10.052	0.00971814	0.795872	2.01242	integral membrane protein 2A [Source:HGNC Symbol;Acc:HGNC:6173]	#	CDK15	ENSOCUG00000007737	43.9992	10.504	77.4944	7.37761	2.88315	4.83444	0.00828458	0.738351	2.08173	cyclin-dependent kinase 15 [Source:HGNC Symbol;Acc:HGNC:14434]	#		ENSOCUG00000000136	238.158	164.244	312.072	1.90005	0.926036	7.82272	0.139661	1	0.854925
ADAM12	ENSOCUG00000008781	5013.35	7089.24	2937.46	0.414354	-1.27106	12.1559	0.014622	0.98708	1.83499	ADAM metallopeptidase domain 12 [Source:HGNC Symbol;Acc:HGNC:190]	#	PSAT1	ENSOCUG00000007765	429.696	253.051	606.341	2.39612	1.2607	8.61363	0.0301205	1	1.52114	Oryctolagus cuniculus phosphoserine aminotransferase 1 (PSAT1), mRNA. [Source:RefSeq mRNA;Acc:NM_001082271]	#		ENSOCUG00000000137	1833.66	1874.48	1792.84	0.956445	-0.0642454	10.8402	0.903305	1	0.0441656
CORIN	ENSOCUG00000008858	154.862	262.6	47.1249	0.179455	-2.4783	6.79757	0.000580157	0.133386	3.23645	corin, serine peptidase [Source:HGNC Symbol;Acc:HGNC:19012]	#	ITGAE	ENSOCUG00000008018	170.886	93.581	248.191	2.65216	1.40717	7.25173	0.0369764	1	1.43208	integrin, alpha E (antigen CD103, human mucosal lymphocyte antigen 1; alpha polypeptide) [Source:HGNC Symbol;Acc:HGNC:6147]	#		ENSOCUG00000000140	657.916	644.563	671.269	1.04143	0.0585689	9.36146	0.918195	1	0.037065
WRB	ENSOCUG00000008935	64.1635	124.138	4.18888	0.0337438	-4.88924	4.51118	1.10384e-05	0.0058371	4.95709	Oryctolagus cuniculus tryptophan rich basic protein (WRB), mRNA. [Source:RefSeq mRNA;Acc:NM_001171290]	#	CST3	ENSOCUG00000008071	5397.32	2828.44	7966.21	2.81647	1.49389	12.2127	0.00428973	0.468893	2.36757	Oryctolagus cuniculus cystatin C (CST3), mRNA. [Source:RefSeq mRNA;Acc:NM_001082706]	#		ENSOCUG00000000141	54.7052	70.6632	38.7472	0.548336	-0.866868	5.70945	0.355663	1	0.448961
RELN	ENSOCUG00000009050	682.37	951.089	413.652	0.434925	-1.20116	9.29286	0.0310057	1	1.50856	reelin [Source:HGNC Symbol;Acc:HGNC:9957]	#	-	ENSOCUG00000008644	78.7898	38.1963	119.383	3.12552	1.64409	6.07741	0.0486838	1	1.31262	Uncharacterized protein [Source:UniProtKB/TrEMBL;Acc:G1SVK8]	#		ENSOCUG00000000142	2.00213	1.90982	2.09444	1.09667	0.133132	1	1	1	0
LGR5	ENSOCUG00000009203	892.212	1213.69	570.735	0.470249	-1.0885	9.70093	0.0460541	1	1.33673	leucine-rich repeat containing G protein-coupled receptor 5 [Source:HGNC Symbol;Acc:HGNC:4504]	#	ENOSF1	ENSOCUG00000008678	133.877	46.7905	220.964	4.7224	2.23952	6.6679	0.00231465	0.313843	2.63552	enolase superfamily member 1 [Source:HGNC Symbol;Acc:HGNC:30365]	#		ENSOCUG00000000144	16.0791	24.8276	7.33055	0.295258	-1.75995	3.7539	0.294091	1	0.531518
ABCA1	ENSOCUG00000009279	695.141	1022.71	367.575	0.359413	-1.47628	9.26003	0.00838435	0.743069	2.07653	ATP-binding cassette, sub-family A (ABC1), member 1 [Source:HGNC Symbol;Acc:HGNC:29]	#	CDH1	ENSOCUG00000008805	1881.88	1147.8	2615.96	2.27911	1.18847	10.7589	0.0247852	1	1.60581	cadherin 1, type 1, E-cadherin (epithelial) [Source:HGNC Symbol;Acc:HGNC:1748]	#		ENSOCUG00000000145	626.104	414.43	837.777	2.02152	1.01544	9.2027	0.0688904	1	1.16184
ADAMTS16	ENSOCUG00000009507	97.1366	146.101	48.1722	0.329718	-1.60069	6.39047	0.0410053	1	1.38716	ADAM metallopeptidase with thrombospondin type 1 motif, 16 [Source:HGNC Symbol;Acc:HGNC:17108]	#	P2RX7	ENSOCUG00000008823	316.454	190.982	441.927	2.31398	1.21038	8.18248	0.0447611	1	1.3491	purinergic receptor P2X, ligand gated ion channel, 7 [Source:HGNC Symbol;Acc:HGNC:8537]	#		ENSOCUG00000000146	4435.68	4806.05	4065.31	0.845873	-0.241486	12.1099	0.638589	1	0.194779
MYADM	ENSOCUG00000009677	832.409	1140.16	524.658	0.460161	-1.11979	9.59513	0.0411297	1	1.38584	Oryctolagus cuniculus myeloid-associated differentiation marker (MYADM), mRNA. [Source:RefSeq mRNA;Acc:NM_001171388]	#	PDILT	ENSOCUG00000009056	341.55	40.1061	642.994	16.0323	4.00291	7.32721	3.26346e-09	3.98243e-06	8.48632	protein disulfide isomerase-like, testis expressed [Source:HGNC Symbol;Acc:HGNC:27338]	#		ENSOCUG00000000149	1358.83	1677.77	1039.89	0.619804	-0.690117	10.3673	0.193705	1	0.71286
MEIS2	ENSOCUG00000009906	260.267	367.64	152.894	0.415881	-1.26576	7.88927	0.0419964	1	1.37679	Meis homeobox 2 [Source:HGNC Symbol;Acc:HGNC:7001]	#	CAND2	ENSOCUG00000009266	134.248	71.6181	196.878	2.74899	1.4589	6.8917	0.0409429	1	1.38782	cullin-associated and neddylation-dissociated 2 (putative) [Source:HGNC Symbol;Acc:HGNC:30689]	#		ENSOCUG00000000152	636.962	763.927	509.997	0.667599	-0.582946	9.28582	0.293181	1	0.532865
DLL4	ENSOCUG00000010756	177.532	270.239	84.8249	0.313888	-1.67168	7.24225	0.0133684	0.96244	1.87392	delta-like 4 (Drosophila) [Source:HGNC Symbol;Acc:HGNC:2910]	#	MAML3	ENSOCUG00000009376	148.971	81.1672	216.775	2.67072	1.41723	7.05144	0.0415838	1	1.38108	mastermind-like 3 (Drosophila) [Source:HGNC Symbol;Acc:HGNC:16272]	#		ENSOCUG00000000153	343.131	267.374	418.888	1.56667	0.647705	8.38657	0.27371	1	0.56271
SRPX2	ENSOCUG00000011186	673.103	1023.66	322.544	0.315089	-1.66617	9.16644	0.00316343	0.382654	2.49984	sushi-repeat containing protein, X-linked 2 [Source:HGNC Symbol;Acc:HGNC:30668]	#	C17orf64	ENSOCUG00000009414	118.754	56.3396	181.169	3.21567	1.68512	6.65864	0.0230187	1	1.63792	chromosome 17 open reading frame 64 [Source:HGNC Symbol;Acc:HGNC:26990]	#		ENSOCUG00000000155	190.637	248.276	132.997	0.535682	-0.900551	7.50553	0.168376	1	0.773719
DDR2	ENSOCUG00000011443	394.674	544.298	245.05	0.450213	-1.15132	8.51259	0.0494427	1	1.3059	discoidin domain receptor tyrosine kinase 2 [Source:HGNC Symbol;Acc:HGNC:2731]	#	KIAA1211L	ENSOCUG00000009514	165.742	91.6712	239.814	2.61602	1.38737	7.21208	0.0409177	1	1.38809	KIAA1211-like [Source:HGNC Symbol;Acc:HGNC:33454]	#		ENSOCUG00000000156	533.54	585.359	481.722	0.822951	-0.281121	9.05262	0.618431	1	0.208708
F13A1	ENSOCUG00000011452	131.96	227.268	36.6527	0.161275	-2.6324	6.51205	0.000484791	0.116802	3.31445	coagulation factor XIII, A1 polypeptide [Source:HGNC Symbol;Acc:HGNC:3531]	#	TUBE1	ENSOCUG00000009644	378.561	119.364	637.758	5.34299	2.41765	8.10804	8.19845e-05	0.0333488	4.08627	tubulin, epsilon 1 [Source:HGNC Symbol;Acc:HGNC:20775]	#		ENSOCUG00000000157	105.082	111.724	98.4388	0.881087	-0.182644	6.71248	0.818377	1	0.0870464
POSTN	ENSOCUG00000011482	4956.93	7682.24	2231.63	0.290492	-1.78343	12.0156	0.000731881	0.150647	3.13556	periostin, osteoblast specific factor [Source:HGNC Symbol;Acc:HGNC:16953]	#	THEM5	ENSOCUG00000009679	131.935	21.9629	241.908	11.0144	3.46132	6.18766	1.14606e-05	0.00586486	4.94079	thioesterase superfamily member 5 [Source:HGNC Symbol;Acc:HGNC:26755]	#		ENSOCUG00000000158	2595.55	2274.59	2916.51	1.28221	0.358636	11.3307	0.489675	1	0.310093
TNC	ENSOCUG00000011500	81798.5	120372	43225.1	0.359096	-1.47756	16.1384	0.00430558	0.468893	2.36597	tenascin C [Source:HGNC Symbol;Acc:HGNC:5318]	#	RCE1	ENSOCUG00000009821	523.409	307.48	739.338	2.4045	1.26574	8.89722	0.0263621	1	1.57902	Ras converting CAAX endopeptidase 1 [Source:HGNC Symbol;Acc:HGNC:13721]	#		ENSOCUG00000000159	570.645	381.008	760.282	1.99545	0.996713	9.07204	0.0763282	1	1.11731
FIBIN	ENSOCUG00000011624	851.911	1256.66	447.163	0.355835	-1.49072	9.55002	0.00697928	0.683452	2.15619	fin bud initiation factor homolog (zebrafish) [Source:HGNC Symbol;Acc:HGNC:33747]	#	SLC24A3	ENSOCUG00000009833	68.9637	24.8276	113.1	4.55541	2.18758	5.72766	0.013993	0.973257	1.85409	solute carrier family 24 (sodium/potassium/calcium exchanger), member 3 [Source:HGNC Symbol;Acc:HGNC:10977]	#		ENSOCUG00000000161	457.27	419.205	495.336	1.18161	0.240751	8.83189	0.675133	1	0.170611
NR4A1	ENSOCUG00000011746	323.474	457.401	189.547	0.4144	-1.2709	8.20186	0.0349678	1	1.45633	nuclear receptor subfamily 4, group A, member 1 [Source:HGNC Symbol;Acc:HGNC:7980]	#	HDAC11	ENSOCUG00000009839	115.458	48.7003	182.216	3.74159	1.90365	6.55768	0.0114426	0.868543	1.94148	histone deacetylase 11 [Source:HGNC Symbol;Acc:HGNC:19086]	#		ENSOCUG00000000162	32.3269	35.3316	29.3222	0.829914	-0.268966	5.0084	0.838753	1	0.0763658
STARD13	ENSOCUG00000011808	689.257	1003.61	374.905	0.373557	-1.4206	9.26068	0.0111157	0.851884	1.95406	StAR-related lipid transfer (START) domain containing 13 [Source:HGNC Symbol;Acc:HGNC:19164]	#	ITGA3	ENSOCUG00000009990	787.764	482.229	1093.3	2.26718	1.1809	9.50402	0.0320289	1	1.49446	integrin, alpha 3 (antigen CD49C, alpha 3 subunit of VLA-3 receptor) [Source:HGNC Symbol;Acc:HGNC:6139]	#		ENSOCUG00000000163	795.473	669.391	921.555	1.37671	0.461221	9.61732	0.397562	1	0.400595
COCH	ENSOCUG00000012042	1451.21	2388.23	514.186	0.2153	-2.21558	10.1139	5.84558e-05	0.0250633	4.23317	cochlin [Source:HGNC Symbol;Acc:HGNC:2180]	#	KIAA1522	ENSOCUG00000009999	508.333	316.075	700.591	2.21654	1.14831	8.87827	0.0439509	1	1.35703	KIAA1522 [Source:HGNC Symbol;Acc:HGNC:29301]	#		ENSOCUG00000000164	901.837	873.741	929.932	1.06431	0.08992	9.81602	0.869557	1	0.0607019
CMKLR1	ENSOCUG00000012259	164.502	247.321	81.6832	0.330272	-1.59827	7.15111	0.0196597	1	1.70642	chemokine-like receptor 1 [Source:HGNC Symbol;Acc:HGNC:2121]	#	TTC22	ENSOCUG00000010144	417.206	240.637	593.774	2.46751	1.30306	8.56224	0.0256311	1	1.59123	tetratricopeptide repeat domain 22 [Source:HGNC Symbol;Acc:HGNC:26067]	#		ENSOCUG00000000165	52.7795	56.3396	49.2194	0.87362	-0.194922	5.71862	0.854206	1	0.0684375
PEG3	ENSOCUG00000012339	159.269	312.255	6.28333	0.0201224	-5.63505	5.46905	2.63239e-10	3.79638e-07	9.57965	paternally expressed 3 [Source:HGNC Symbol;Acc:HGNC:8826]	#	ALOX15B	ENSOCUG00000010340	91.2944	28.6472	153.941	5.37369	2.42591	6.05328	0.00321233	0.38316	2.49318	arachidonate 15-lipoxygenase, type B [Source:HGNC Symbol;Acc:HGNC:434]	#		ENSOCUG00000000166	48.4521	59.2043	37.7	0.636777	-0.651139	5.56206	0.511361	1	0.291273
FRMPD3	ENSOCUG00000012374	70.2463	117.454	23.0389	0.196153	-2.34995	5.70097	0.00866982	0.759879	2.06199	FERM and PDZ domain containing 3 [Source:HGNC Symbol;Acc:HGNC:29382]	#	PVRL1	ENSOCUG00000010458	2023.5	1088.6	2958.4	2.71763	1.44235	10.8094	0.00666619	0.665109	2.17612	poliovirus receptor-related 1 (herpesvirus entry mediator C) [Source:HGNC Symbol;Acc:HGNC:9706]	#		ENSOCUG00000000167	1775.11	1905.04	1645.18	0.863595	-0.211574	10.7898	0.68696	1	0.163069
FILIP1	ENSOCUG00000012854	79.9641	122.228	37.7	0.308439	-1.69694	6.08496	0.0418666	1	1.37813	filamin A interacting protein 1 [Source:HGNC Symbol;Acc:HGNC:21015]	#	PAPLN	ENSOCUG00000010681	806.194	393.422	1218.97	3.09836	1.63151	9.43569	0.00337039	0.394037	2.47232	papilin, proteoglycan-like sulfated glycoprotein [Source:HGNC Symbol;Acc:HGNC:19262]	#		ENSOCUG00000000170	72.4315	83.077	61.786	0.74372	-0.427168	6.16279	0.620098	1	0.20754
RGS1	ENSOCUG00000012873	13.4149	25.7825	1.04722	0.0406175	-4.62176	2.37744	0.0433544	1	1.36297	regulator of G-protein signaling 1 [Source:HGNC Symbol;Acc:HGNC:9991]	#	COL4A6	ENSOCUG00000010845	153.836	56.3396	251.333	4.46104	2.15738	6.89477	0.00233618	0.314078	2.63149	collagen, type IV, alpha 6 [Source:HGNC Symbol;Acc:HGNC:2208]	#		ENSOCUG00000000172	212.67	149.921	275.419	1.8371	0.87743	7.66677	0.169949	1	0.769682
-	ENSOCUG00000012914	30.7878	56.3396	5.23611	0.0929383	-3.42758	4.10229	0.0100749	0.804178	1.99676	-	#	COL4A5	ENSOCUG00000010874	441.12	190.027	692.213	3.64271	1.86501	8.50257	0.00157653	0.244593	2.8023	collagen, type IV, alpha 5 [Source:HGNC Symbol;Acc:HGNC:2207]	#		ENSOCUG00000000173	158.494	209.125	107.864	0.515786	-0.955154	7.23064	0.160343	1	0.794951
BHLHE22	ENSOCUG00000012968	44.1868	71.6181	16.7555	0.233957	-2.09569	5.11441	0.0459595	1	1.33762	basic helix-loop-helix family, member e22 [Source:HGNC Symbol;Acc:HGNC:11963]	#	EPHA1	ENSOCUG00000011082	1745.06	1010.29	2479.82	2.45455	1.29546	10.6283	0.0148871	0.991464	1.82719	EPH receptor A1 [Source:HGNC Symbol;Acc:HGNC:3385]	#		ENSOCUG00000000174	53.3493	55.3847	51.3138	0.926499	-0.110139	5.73635	0.927148	1	0.0328508
MAPK4	ENSOCUG00000013016	76.7301	124.138	29.3222	0.236206	-2.08188	5.91486	0.0152831	0.996949	1.81579	mitogen-activated protein kinase 4 [Source:HGNC Symbol;Acc:HGNC:6878]	#	CYP4B1	ENSOCUG00000011201	375.943	119.364	632.522	5.29912	2.40575	8.10209	8.93595e-05	0.0337735	4.04886	Oryctolagus cuniculus CYP4B1-like isozyme short form (CYP4B1), mRNA. [Source:RefSeq mRNA;Acc:NM_001082103]	#		ENSOCUG00000000179	13162.8	11119	15206.7	1.36764	0.451686	13.6666	0.375785	1	0.42506
-	ENSOCUG00000013412	197.37	325.624	69.1166	0.212259	-2.2361	7.22901	0.000945862	0.172473	3.02417	-	#	MAPT	ENSOCUG00000011386	282.095	165.199	398.991	2.41521	1.27215	8.00414	0.03831	1	1.41669	microtubule-associated protein tau [Source:HGNC Symbol;Acc:HGNC:6893]	#		ENSOCUG00000000182	53.9334	32.4669	75.3999	2.32236	1.21559	5.62869	0.196908	1	0.705736
IGHM	ENSOCUG00000013533	148.008	231.088	64.9277	0.280966	-1.83153	6.93653	0.0096234	0.795134	2.01667	immunoglobulin heavy constant mu [Source:HGNC Symbol;Acc:HGNC:5541]	#	HSD17B7	ENSOCUG00000011463	847.624	467.905	1227.34	2.62306	1.39125	9.5657	0.011571	0.874108	1.93663	hydroxysteroid (17-beta) dehydrogenase 7 [Source:HGNC Symbol;Acc:HGNC:5215]	#		ENSOCUG00000000184	86.1998	90.7163	81.6832	0.900425	-0.151321	6.42763	0.862569	1	0.0642063
ALAS2	ENSOCUG00000013603	146.098	227.268	64.9277	0.285688	-1.80749	6.92451	0.0107829	0.834441	1.96726	5'-aminolevulinate synthase 2 [Source:HGNC Symbol;Acc:HGNC:397]	#	EXOSC5	ENSOCUG00000011497	165.141	71.6181	258.664	3.61171	1.85268	7.08859	0.00719188	0.686687	2.14316	exosome component 5 [Source:HGNC Symbol;Acc:HGNC:24662]	#		ENSOCUG00000000185	992.289	1006.47	978.104	0.971814	-0.0412484	9.95447	0.94074	1	0.0265306
WNT5B	ENSOCUG00000013686	251.997	376.234	127.761	0.339579	-1.55818	7.77639	0.0135063	0.96244	1.86946	wingless-type MMTV integration site family, member 5B [Source:HGNC Symbol;Acc:HGNC:16265]	#	ANK1	ENSOCUG00000011683	75.0163	29.6022	120.43	4.0683	2.02443	5.89984	0.0184946	1	1.73295	ankyrin 1, erythrocytic [Source:HGNC Symbol;Acc:HGNC:492]	#		ENSOCUG00000000186	118.45	138.462	98.4388	0.710946	-0.492188	6.86725	0.502064	1	0.299241
-	ENSOCUG00000013968	350.904	496.552	205.255	0.413361	-1.27453	8.31854	0.0325497	1	1.48745	-	#	VWA2	ENSOCUG00000011700	360.113	165.199	555.027	3.35975	1.74835	8.24224	0.0036772	0.419677	2.43448	von Willebrand factor A domain containing 2 [Source:HGNC Symbol;Acc:HGNC:24709]	#		ENSOCUG00000000187	4133.66	4749.71	3517.62	0.740595	-0.433243	11.997	0.400216	1	0.397705
DST	ENSOCUG00000014074	1034.03	1410.4	657.655	0.46629	-1.1007	9.91154	0.0420196	1	1.37655	dystonin [Source:HGNC Symbol;Acc:HGNC:1090]	#	CA2	ENSOCUG00000011742	3226.51	1776.13	4676.89	2.63319	1.39681	11.4929	0.00785749	0.716386	2.10472	Carbonic anhydrase 2 [Source:UniProtKB/Swiss-Prot;Acc:P00919]	#		ENSOCUG00000000188	893.457	841.274	945.641	1.12406	0.168716	9.80079	0.756209	1	0.121358
IL20	ENSOCUG00000014282	22.625	41.0611	4.18888	0.102016	-3.29313	3.71313	0.0310594	1	1.50781	interleukin 20 [Source:HGNC Symbol;Acc:HGNC:6002]	#	-	ENSOCUG00000011793	157.425	68.7534	246.097	3.57942	1.83972	7.02322	0.0082327	0.738351	2.08446	Uncharacterized protein [Source:UniProtKB/TrEMBL;Acc:G1T200]	#		ENSOCUG00000000191	170.612	164.244	176.98	1.07754	0.107747	7.41357	0.879654	1	0.055688
HEG1	ENSOCUG00000014625	1082.96	1503.03	662.891	0.441038	-1.18103	9.96314	0.0290308	1	1.53714	heart development protein with EGF-like domains 1 [Source:HGNC Symbol;Acc:HGNC:29227]	#	TPD52L1	ENSOCUG00000011858	160.027	58.2494	261.805	4.49456	2.16818	6.94826	0.00203702	0.285976	2.691	tumor protein D52-like 1 [Source:HGNC Symbol;Acc:HGNC:12006]	#		ENSOCUG00000000193	681.326	669.391	693.26	1.03566	0.0505488	9.41198	0.929509	1	0.0317462
SH3RF3	ENSOCUG00000014996	732.656	1026.53	438.786	0.427447	-1.22618	9.39046	0.0269618	1	1.56925	SH3 domain containing ring finger 3 [Source:HGNC Symbol;Acc:HGNC:24699]	#	CACNA1A	ENSOCUG00000011985	156.392	46.7905	265.994	5.68479	2.50711	6.8017	0.000476107	0.116802	3.3223	calcium channel, voltage-dependent, P/Q type, alpha 1A subunit [Source:HGNC Symbol;Acc:HGNC:1388]	#		ENSOCUG00000000194	218.156	220.584	215.728	0.977985	-0.0321165	7.76912	0.967563	1	0.0143209
COL5A2	ENSOCUG00000015020	48423.6	66370.9	30476.2	0.459181	-1.12287	15.4568	0.02875	1	1.54136	collagen, type V, alpha 2 [Source:HGNC Symbol;Acc:HGNC:2210]	#	IDNK	ENSOCUG00000012032	72.1054	24.8276	119.383	4.80848	2.26558	5.76666	0.0100524	0.804178	1.99773	idnK, gluconokinase homolog (E. coli) [Source:HGNC Symbol;Acc:HGNC:31367]	#		ENSOCUG00000000197	481.108	381.008	581.208	1.52545	0.609231	8.87829	0.284108	1	0.546517
MPEG1	ENSOCUG00000015057	219.347	347.587	91.1082	0.262117	-1.93172	7.47537	0.00316925	0.382654	2.49904	macrophage expressed 1 [Source:HGNC Symbol;Acc:HGNC:29619]	#	EML6	ENSOCUG00000012044	153.45	21.008	285.891	13.6087	3.76646	6.27609	1.18128e-06	0.000986311	5.92765	echinoderm microtubule associated protein like 6 [Source:HGNC Symbol;Acc:HGNC:35412]	#		ENSOCUG00000000200	469.608	456.446	482.769	1.05767	0.0808882	8.87474	0.890468	1	0.0503818
-	ENSOCUG00000015143	121.902	186.207	57.5972	0.309318	-1.69284	6.69435	0.0218366	1	1.66082	-	#	FAT2	ENSOCUG00000012103	1011.72	539.523	1483.91	2.75041	1.45965	9.80537	0.00755911	0.701274	2.12153	FAT atypical cadherin 2 [Source:HGNC Symbol;Acc:HGNC:3596]	#		ENSOCUG00000000201	47.2203	63.0239	31.4166	0.498487	-1.00437	5.47564	0.312119	1	0.50568
COL12A1	ENSOCUG00000015320	16672.5	23827.8	9517.14	0.399413	-1.32405	13.8783	0.0104366	0.823716	1.98144	collagen, type XII, alpha 1 [Source:HGNC Symbol;Acc:HGNC:2188]	#	MRM1	ENSOCUG00000012149	102.892	48.7003	157.083	3.22551	1.68953	6.45062	0.0283963	1	1.54674	mitochondrial rRNA methyltransferase 1 homolog (S. cerevisiae) [Source:HGNC Symbol;Acc:HGNC:26202]	#		ENSOCUG00000000203	228.661	274.059	183.264	0.668702	-0.580564	7.80806	0.357327	1	0.446934
RACGAP1	ENSOCUG00000015681	220.162	319.894	120.43	0.376469	-1.4094	7.61675	0.0283536	1	1.54739	Rac GTPase activating protein 1 [Source:HGNC Symbol;Acc:HGNC:9804]	#	FAM213A	ENSOCUG00000012307	158.55	88.8065	228.294	2.57069	1.36216	7.15367	0.0466882	1	1.33079	family with sequence similarity 213, member A [Source:HGNC Symbol;Acc:HGNC:28651]	#		ENSOCUG00000000213	3.04935	1.90982	4.18888	2.19334	1.13313	1.5	0.87468	1	0.0581508
PAI1	ENSOCUG00000016068	773.684	1055.17	492.194	0.466458	-1.10018	9.49317	0.045744	1	1.33967	Uncharacterized protein [Source:UniProtKB/TrEMBL;Acc:G1TAU6]	#	TSC22D3	ENSOCUG00000012397	890.009	544.298	1235.72	2.2703	1.18289	9.67969	0.0304666	1	1.51618	TSC22 domain family, member 3 [Source:HGNC Symbol;Acc:HGNC:3051]	#		ENSOCUG00000000214	67.3339	80.2123	54.4555	0.678892	-0.558746	6.04638	0.523682	1	0.280933
IL18R1	ENSOCUG00000016476	108.01	159.47	56.5499	0.354612	-1.49568	6.5693	0.0483562	1	1.31555	Oryctolagus cuniculus interleukin 18 receptor 1 (IL18R1), mRNA. [Source:RefSeq mRNA;Acc:NM_001164863]	#	GDA	ENSOCUG00000012403	215.239	85.9417	344.536	4.00895	2.00322	7.4269	0.00231378	0.313843	2.63568	guanine deaminase [Source:HGNC Symbol;Acc:HGNC:4212]	#		ENSOCUG00000000215	254.917	229.178	280.655	1.22462	0.292331	7.98649	0.638813	1	0.194626
GJA5	ENSOCUG00000016576	213.139	302.706	123.572	0.408225	-1.29256	7.59549	0.0449714	1	1.34706	Gap junction protein [Source:UniProtKB/TrEMBL;Acc:G1TQ37]	#	PPIA	ENSOCUG00000012631	1195.04	40.1061	2349.96	58.5936	5.87267	8.26209	1.77164e-18	7.02632e-15	17.7516	Oryctolagus cuniculus peptidylprolyl isomerase A (cyclophilin A) (PPIA), mRNA. [Source:RefSeq mRNA;Acc:NM_001082057]	#		ENSOCUG00000000218	33.7131	39.1512	28.275	0.722199	-0.469532	5.05622	0.694395	1	0.158393
GXYLT2	ENSOCUG00000016704	239.136	338.992	139.28	0.410866	-1.28326	7.76348	0.0421468	1	1.37524	glucoside xylosyltransferase 2 [Source:HGNC Symbol;Acc:HGNC:33383]	#	PAFAH2	ENSOCUG00000012696	284.236	164.244	404.227	2.46114	1.29932	8.00936	0.0342773	1	1.46499	platelet-activating factor acetylhydrolase 2, 40kDa [Source:HGNC Symbol;Acc:HGNC:8579]	#		ENSOCUG00000000220	317.479	364.775	270.183	0.740684	-0.43307	8.29433	0.469627	1	0.328247
PTGS2	ENSOCUG00000016771	143.833	209.125	78.5416	0.375573	-1.41284	7.0018	0.0442732	1	1.35386	Oryctolagus cuniculus prostaglandin-endoperoxide synthase 2 (prostaglandin G/H synthase and cyclooxygenase) (PTGS2), mRNA. [Source:RefSeq mRNA;Acc:NM_001082388]	#	TJP2	ENSOCUG00000013019	1038.41	658.887	1417.94	2.15202	1.10569	9.91673	0.041013	1	1.38708	tight junction protein 2 [Source:HGNC Symbol;Acc:HGNC:11828]	#		ENSOCUG00000000222	12.4902	12.4138	12.5667	1.01231	0.0176548	3.6427	1	1	0
WWC2	ENSOCUG00000016984	365.535	508.011	223.058	0.439081	-1.18744	8.395	0.0448556	1	1.34818	WW and C2 domain containing 2 [Source:HGNC Symbol;Acc:HGNC:24148]	#	KRT32	ENSOCUG00000013079	114.303	40.1061	188.5	4.70002	2.23267	6.44209	0.00353039	0.408804	2.45218	keratin 32 [Source:HGNC Symbol;Acc:HGNC:6449]	#		ENSOCUG00000000224	18.9582	8.59417	29.3222	3.41187	1.77056	3.98864	0.245811	1	0.609399
WIPI1	ENSOCUG00000017409	1435.15	1940.37	929.932	0.479254	-1.06114	10.3916	0.0464945	1	1.3326	WD repeat domain, phosphoinositide interacting 1 [Source:HGNC Symbol;Acc:HGNC:25471]	#	VIPR1	ENSOCUG00000013106	52.0538	17.1883	86.9193	5.05688	2.33825	5.27248	0.0183972	1	1.73525	Uncharacterized protein [Source:UniProtKB/TrEMBL;Acc:G1T4R1]	#		ENSOCUG00000000227	753.044	658.887	847.202	1.28581	0.362675	9.54522	0.507625	1	0.294457
PTAFR	ENSOCUG00000017831	53.0118	84.0319	21.9916	0.261706	-1.93398	5.42587	0.0464328	1	1.33318	platelet-activating factor receptor [Source:HGNC Symbol;Acc:HGNC:9582]	#	KRT13	ENSOCUG00000013123	2194.78	816.447	3573.12	4.37643	2.12975	10.7381	8.53845e-05	0.0337735	4.06862	keratin 13 [Source:HGNC Symbol;Acc:HGNC:6415]	#		ENSOCUG00000000228	208.836	164.244	253.427	1.54299	0.625731	7.67256	0.328846	1	0.483007
MAB21L1	ENSOCUG00000017845	312.02	531.884	92.1555	0.173262	-2.52897	7.79048	6.67068e-05	0.0278483	4.17583	mab-21-like 1 (C. elegans) [Source:HGNC Symbol;Acc:HGNC:6757]	#	TLX1	ENSOCUG00000013136	108.806	56.3396	161.272	2.8625	1.51728	6.57471	0.0444353	1	1.35227	T-cell leukemia homeobox 1 [Source:HGNC Symbol;Acc:HGNC:5056]	#		ENSOCUG00000000229	603.381	592.043	614.719	1.0383	0.0542243	9.23667	0.925264	1	0.0337342
MMP1	ENSOCUG00000017958	194.676	338.038	51.3138	0.151799	-2.71976	7.04116	8.94154e-05	0.0337735	4.04859	Oryctolagus cuniculus matrix metallopeptidase 1 (interstitial collagenase) (MMP1), mRNA. [Source:RefSeq mRNA;Acc:NM_001171139]	#	DSP	ENSOCUG00000013150	24886.6	16066.3	33706.9	2.09798	1.069	14.5063	0.0373503	1	1.42771	desmoplakin [Source:HGNC Symbol;Acc:HGNC:3052]	#		ENSOCUG00000000230	5.43662	6.68436	4.18888	0.62667	-0.674223	2.40368	0.88347	1	0.0538081
SNORA73	ENSOCUG00000018249	54.4903	85.9417	23.0389	0.268075	-1.89929	5.47564	0.0478337	1	1.32027	Small nucleolar RNA SNORA73 family [Source:RFAM;Acc:RF00045]	#	SNCG	ENSOCUG00000013292	89.1697	40.1061	138.233	3.44668	1.78521	6.21836	0.026844	1	1.57115	synuclein, gamma (breast cancer-specific protein 1) [Source:HGNC Symbol;Acc:HGNC:11141]	#		ENSOCUG00000000231	89.4337	88.8065	90.061	1.01413	0.020238	6.48271	0.995741	1	0.00185352
-	ENSOCUG00000019159	93.2246	140.372	46.0777	0.328256	-1.60711	6.32955	0.042705	1	1.36952	-	#	EPYC	ENSOCUG00000013389	705.287	303.661	1106.91	3.64523	1.86601	9.17932	0.000975337	0.175827	3.01085	epiphycan [Source:HGNC Symbol;Acc:HGNC:3053]	#		ENSOCUG00000000232	2.43343	3.81963	1.04722	0.274168	-1.86687	1	0.816043	1	0.088287
-	ENSOCUG00000021238	88.8208	155.65	21.9916	0.141289	-2.82328	5.87052	0.000919404	0.171593	3.03649	Uncharacterized protein [Source:UniProtKB/TrEMBL;Acc:G1TGT6]	#	-	ENSOCUG00000013679	196.79	99.3105	294.269	2.96312	1.56712	7.41743	0.0173332	1	1.76112	Uncharacterized protein [Source:UniProtKB/TrEMBL;Acc:G1T5W8]	#		ENSOCUG00000000234	474.694	546.208	403.18	0.738145	-0.438025	8.87429	0.44203	1	0.354549
-	ENSOCUG00000021352	622.08	995.969	248.191	0.249196	-2.00465	8.95763	0.00048594	0.116802	3.31342	Uncharacterized protein [Source:UniProtKB/TrEMBL;Acc:G1U598]	#	TMEM54	ENSOCUG00000013684	1078.24	647.428	1509.05	2.33083	1.22085	9.949	0.0241422	1	1.61722	transmembrane protein 54 [Source:HGNC Symbol;Acc:HGNC:24143]	#		ENSOCUG00000000236	159.308	148.966	169.65	1.13885	0.18758	7.31263	0.788465	1	0.103218
-	ENSOCUG00000021436	61.0823	101.22	20.9444	0.206919	-2.27286	5.52492	0.0152032	0.996949	1.81807	Uncharacterized protein [Source:UniProtKB/TrEMBL;Acc:G1U6C9]	#	FOXN1	ENSOCUG00000013779	146.538	77.3476	215.728	2.78907	1.47978	7.01318	0.0343581	1	1.46397	forkhead box N1 [Source:HGNC Symbol;Acc:HGNC:12765]	#		ENSOCUG00000000237	197.966	215.809	180.122	0.834635	-0.260782	7.62322	0.691097	1	0.160461
FOS	ENSOCUG00000021506	9287.92	14015.2	4560.65	0.325408	-1.61968	12.9649	0.00193823	0.279528	2.71259	FBJ murine osteosarcoma viral oncogene homolog [Source:HGNC Symbol;Acc:HGNC:3796]	#	-	ENSOCUG00000013891	71.9972	16.2334	127.761	7.87023	2.97641	5.5091	0.00114838	0.199634	2.93991	Uncharacterized protein [Source:UniProtKB/TrEMBL;Acc:G1T6B8]	#		ENSOCUG00000000239	1.47852	1.90982	1.04722	0.548336	-0.866868	0.5	1	1	0
ACAN	ENSOCUG00000022093	3533.02	4772.63	2293.41	0.480535	-1.05729	11.6919	0.0422965	1	1.3737	aggrecan [Source:HGNC Symbol;Acc:HGNC:319]	#	PLA2G4D	ENSOCUG00000013994	2009.34	1294.86	2723.82	2.10357	1.07284	10.875	0.0418376	1	1.37843	phospholipase A2, group IVD (cytosolic) [Source:HGNC Symbol;Acc:HGNC:30038]	#		ENSOCUG00000000244	445.21	376.234	514.186	1.36666	0.450659	8.78082	0.431953	1	0.364563
CBX3	ENSOCUG00000022201	73.8654	118.409	29.3222	0.247636	-2.01371	5.88078	0.0201215	1	1.69634	chromobox homolog 3 [Source:HGNC Symbol;Acc:HGNC:1553]	#	SORD	ENSOCUG00000014246	119.047	61.1141	176.98	2.8959	1.53401	6.70044	0.0374734	1	1.42628	sorbitol dehydrogenase [Source:HGNC Symbol;Acc:HGNC:11184]	#		ENSOCUG00000000245	984.341	975.916	992.766	1.01727	0.0246958	9.94296	0.965372	1	0.0153051
TAGLN2	ENSOCUG00000022296	1833.52	2473.21	1193.83	0.482705	-1.05079	10.7468	0.0467541	1	1.33018	transgelin 2 [Source:HGNC Symbol;Acc:HGNC:11554]	#	DUOXA1	ENSOCUG00000014298	160.444	82.1221	238.766	2.90746	1.53976	7.12958	0.0248803	1	1.60414	dual oxidase maturation factor 1 [Source:HGNC Symbol;Acc:HGNC:26507]	#		ENSOCUG00000000247	1184.19	1271.94	1096.44	0.862024	-0.214201	10.2057	0.688276	1	0.162237
OPN	ENSOCUG00000022536	689.326	1175.49	203.161	0.172831	-2.53257	8.93276	1.36106e-05	0.00674743	4.86612	Oryctolagus cuniculus secreted phosphoprotein 1 (SPP1), mRNA. [Source:RefSeq mRNA;Acc:NM_001082194]	#	DUOX1	ENSOCUG00000014307	805.918	431.619	1180.22	2.7344	1.45122	9.47923	0.0087607	0.760846	2.05746	dual oxidase 1 [Source:HGNC Symbol;Acc:HGNC:3062]	#		ENSOCUG00000000248	6.9613	7.63927	6.28333	0.822504	-0.281905	2.79248	0.975284	1	0.0108689
-	ENSOCUG00000022708	17.2345	33.4218	1.04722	0.0313335	-4.99615	2.56464	0.0153966	0.996949	1.81257	Uncharacterized protein [Source:UniProtKB/TrEMBL;Acc:G1TTX5]	#	CD53	ENSOCUG00000014420	520.191	319.894	720.488	2.25227	1.17138	8.90714	0.0395414	1	1.40295	CD53 molecule [Source:HGNC Symbol;Acc:HGNC:1686]	#		ENSOCUG00000000249	389.382	350.451	428.313	1.22218	0.289453	8.5978	0.620391	1	0.207334
-	ENSOCUG00000022742	979.404	1457.19	501.619	0.344237	-1.53853	9.73971	0.00505886	0.527986	2.29595	Uncharacterized protein [Source:UniProtKB/TrEMBL;Acc:G1TJH8]	#	HIST1H1C	ENSOCUG00000014422	234.133	52.52	415.747	7.91598	2.98477	7.20718	1.06773e-05	0.0058371	4.97154	histone cluster 1, H1c [Source:HGNC Symbol;Acc:HGNC:4716]	#		ENSOCUG00000000250	1.47852	1.90982	1.04722	0.548336	-0.866868	0.5	1	1	0
FCER1A	ENSOCUG00000022947	31.4499	53.4749	9.42499	0.176251	-2.5043	4.48864	0.0433683	1	1.36283	Fc fragment of IgE, high affinity I, receptor for; alpha polypeptide [Source:HGNC Symbol;Acc:HGNC:3609]	#	ENPP3	ENSOCUG00000014432	113.518	56.3396	170.697	3.02979	1.59922	6.61569	0.0325457	1	1.48751	ectonucleotide pyrophosphatase/phosphodiesterase 3 [Source:HGNC Symbol;Acc:HGNC:3358]	#		ENSOCUG00000000251	2283.19	2399.68	2166.7	0.902911	-0.147345	11.155	0.777564	1	0.109264
FOSB	ENSOCUG00000023019	1154.56	2014.86	294.269	0.14605	-2.77547	9.58873	1.11088e-06	0.00097906	5.95433	FBJ murine osteosarcoma viral oncogene homolog B [Source:HGNC Symbol;Acc:HGNC:3797]	#	HIST1H1E	ENSOCUG00000014442	29.0453	5.72945	52.3611	9.13893	3.19203	4.11441	0.0166678	1	1.77812	Histone H1.4 [Source:UniProtKB/Swiss-Prot;Acc:P02252]	#		ENSOCUG00000000252	1.00106	0.954908	1.04722	1.09667	0.133132	-1.1212e-15	1	1	0
-	ENSOCUG00000023274	2237.52	4460.38	14.6611	0.00328696	-8.24903	7.99844	2.55203e-28	4.04854e-24	27.5931	Uncharacterized protein [Source:UniProtKB/TrEMBL;Acc:G1SE76]	#	HIST1H2BM	ENSOCUG00000014447	279.461	154.695	404.227	2.61306	1.38574	7.96615	0.0246488	1	1.6082	histone cluster 1, H2bm [Source:HGNC Symbol;Acc:HGNC:4750]	#		ENSOCUG00000000255	175.942	194.801	157.083	0.806376	-0.310475	7.45062	0.643355	1	0.191549
PHACTR3	ENSOCUG00000023377	68.9524	111.724	26.1805	0.234332	-2.09338	5.75711	0.0186467	1	1.7294	phosphatase and actin regulator 3 [Source:HGNC Symbol;Acc:HGNC:15833]	#	EFHD1	ENSOCUG00000014497	104.555	46.7905	162.319	3.46906	1.79455	6.44542	0.0198106	1	1.7031	EF-hand domain family, member D1 [Source:HGNC Symbol;Acc:HGNC:29556]	#		ENSOCUG00000000256	96.3791	85.9417	106.817	1.24289	0.313704	6.58214	0.691547	1	0.160178
ROR1	ENSOCUG00000023790	79.5646	141.326	17.8028	0.125969	-2.98886	5.64846	0.000794988	0.1557	3.09964	receptor tyrosine kinase-like orphan receptor 1 [Source:HGNC Symbol;Acc:HGNC:10256]	#	EVPL	ENSOCUG00000014548	2763.81	1545.04	3982.58	2.57765	1.36606	11.2765	0.00948784	0.788037	2.02283	envoplakin [Source:HGNC Symbol;Acc:HGNC:3503]	#		ENSOCUG00000000258	6705.78	8711.63	4699.93	0.539501	-0.890304	12.6436	0.083896	1	1.07626
CCDC8	ENSOCUG00000023898	624.538	858.462	390.613	0.455015	-1.13601	9.1776	0.0424678	1	1.37194	coiled-coil domain containing 8 [Source:HGNC Symbol;Acc:HGNC:25367]	#	AGBL3	ENSOCUG00000014749	82.993	16.2334	149.753	9.22495	3.20554	5.62367	0.000298943	0.0794481	3.52441	ATP/GTP binding protein-like 3 [Source:HGNC Symbol;Acc:HGNC:27981]	#		ENSOCUG00000000259	84.5987	102.175	67.0221	0.655953	-0.608335	6.37073	0.451591	1	0.345255
-	ENSOCUG00000023934	32.2202	59.2043	5.23611	0.0884413	-3.49914	4.13806	0.00765378	0.701847	2.11612	Uncharacterized protein [Source:UniProtKB/TrEMBL;Acc:G1U804]	#	-	ENSOCUG00000014931	55.9658	22.9178	89.0138	3.88405	1.95756	5.49718	0.0391088	1	1.40773	Uncharacterized protein [Source:UniProtKB/TrEMBL;Acc:G1T8E1]	#		ENSOCUG00000000263	234.093	183.342	284.844	1.55362	0.635632	7.83621	0.311119	1	0.507074
FBXO17	ENSOCUG00000024196	195.028	287.427	102.628	0.357056	-1.48578	7.42416	0.0241891	1	1.61638	F-box protein 17 [Source:HGNC Symbol;Acc:HGNC:18754]	#	FXN	ENSOCUG00000015076	191.323	104.085	278.561	2.67628	1.42023	7.41173	0.0312549	1	1.50508	frataxin [Source:HGNC Symbol;Acc:HGNC:3951]	#		ENSOCUG00000000264	2117.17	2281.28	1953.07	0.856129	-0.224099	11.0436	0.667726	1	0.175402
NEXN	ENSOCUG00000024272	185.617	265.464	105.769	0.398431	-1.3276	7.38858	0.0451568	1	1.34528	nexilin (F actin binding protein) [Source:HGNC Symbol;Acc:HGNC:29557]	#	-	ENSOCUG00000015109	1267.98	805.943	1730.01	2.14657	1.10203	10.2055	0.039782	1	1.40031	Uncharacterized protein [Source:UniProtKB/TrEMBL;Acc:G1T8S6]	#		ENSOCUG00000000265	12.7831	17.1883	8.37777	0.48741	-1.03679	3.58496	0.593401	1	0.226652
COL8A1	ENSOCUG00000024465	9275.86	12932.3	5619.39	0.434523	-1.2025	13.0574	0.0200207	1	1.69852	Oryctolagus cuniculus collagen, type VIII, alpha 1 (COL8A1), mRNA. [Source:RefSeq mRNA;Acc:NM_001082666]	#	TSPEAR	ENSOCUG00000015149	46.4326	14.3236	78.5416	5.48336	2.45506	5.06785	0.0185615	1	1.73139	thrombospondin-type laminin G domain and EAR repeats [Source:HGNC Symbol;Acc:HGNC:1268]	#		ENSOCUG00000000266	181.579	208.17	154.989	0.74453	-0.425599	7.48882	0.520178	1	0.283848
-	ENSOCUG00000024524	885.207	1271.94	498.477	0.391904	-1.35143	9.6371	0.0138692	0.973257	1.85795	-	#	PLB1	ENSOCUG00000015168	180.696	96.4457	264.947	2.74711	1.45791	7.3206	0.0290017	1	1.53758	Oryctolagus cuniculus phospholipase B1 (PLB1), mRNA. [Source:RefSeq mRNA;Acc:NM_001101708]	#		ENSOCUG00000000268	1.00106	0.954908	1.04722	1.09667	0.133132	-1.1212e-15	1	1	0
KCTD12	ENSOCUG00000024555	476.979	672.255	281.702	0.419041	-1.25484	8.76545	0.0291783	1	1.53494	potassium channel tetramerization domain containing 12 [Source:HGNC Symbol;Acc:HGNC:14678]	#	COASY	ENSOCUG00000015195	900.496	522.335	1278.66	2.44796	1.29158	9.67462	0.0183487	1	1.7364	CoA synthase [Source:HGNC Symbol;Acc:HGNC:29932]	#		ENSOCUG00000000269	31.6489	27.6923	35.6055	1.28575	0.362614	4.97272	0.775221	1	0.110574
ZBED6	ENSOCUG00000024739	140.353	205.305	75.3999	0.367258	-1.44514	6.95906	0.040986	1	1.38736	zinc finger, BED-type containing 6 [Source:HGNC Symbol;Acc:HGNC:33273]	#	TNNT2	ENSOCUG00000015634	74.9081	21.008	128.808	6.13139	2.61621	5.70097	0.00310946	0.382391	2.50732	troponin T type 2 (cardiac) [Source:HGNC Symbol;Acc:HGNC:11949]	#		ENSOCUG00000000270	55.6283	51.565	59.6916	1.1576	0.211135	5.79389	0.835831	1	0.0778814
-	ENSOCUG00000024788	404.934	624.51	185.358	0.296806	-1.75241	8.41038	0.00318396	0.382654	2.49703	-	#	IL20RA	ENSOCUG00000015696	396.75	154.695	638.805	4.12944	2.04595	8.29626	0.000666308	0.144167	3.17633	interleukin 20 receptor, alpha [Source:HGNC Symbol;Acc:HGNC:6003]	#		ENSOCUG00000000271	100.507	108.86	92.1555	0.846554	-0.240326	6.64616	0.761549	1	0.118302
RPL31	ENSOCUG00000025109	3195.12	5382.82	1007.43	0.187156	-2.41769	11.1853	8.67982e-06	0.00491774	5.06149	ribosomal protein L31 [Source:HGNC Symbol;Acc:HGNC:10334]	#	SFRP4	ENSOCUG00000015877	38.8092	9.54908	68.0694	7.12837	2.83357	4.67215	0.0134438	0.96244	1.87148	secreted frizzled-related protein 4 [Source:HGNC Symbol;Acc:HGNC:10778]	#		ENSOCUG00000000272	1414.71	1485.84	1343.58	0.904261	-0.145189	10.4645	0.784383	1	0.105472
-	ENSOCUG00000025374	846.31	1675.86	16.7555	0.00999815	-6.64412	7.38863	5.40846e-20	2.86e-16	19.2669	Uncharacterized protein [Source:UniProtKB/TrEMBL;Acc:G1TTU4]	#	MYOC	ENSOCUG00000015957	2240.32	870.876	3609.77	4.14499	2.05137	10.792	0.000146609	0.0484541	3.83384	Oryctolagus cuniculus myocilin, trabecular meshwork inducible glucocorticoid response (MYOC), mRNA. [Source:RefSeq mRNA;Acc:NM_001082150]	#		ENSOCUG00000000274	539.821	520.425	559.216	1.07454	0.103716	9.0754	0.856259	1	0.067395
-	ENSOCUG00000025799	109.444	194.801	24.0861	0.123644	-3.01573	6.09799	0.000198342	0.0600328	3.70259	Uncharacterized protein [Source:UniProtKB/TrEMBL;Acc:G1TM25]	#	PARD6B	ENSOCUG00000015993	229.238	88.8065	369.669	4.16264	2.0575	7.50134	0.00158807	0.244593	2.79913	par-6 family cell polarity regulator beta [Source:HGNC Symbol;Acc:HGNC:16245]	#		ENSOCUG00000000276	374.279	435.438	313.119	0.71909	-0.475756	8.52845	0.41645	1	0.380438
KCTD11	ENSOCUG00000026228	226.925	353.316	100.533	0.284542	-1.81329	7.55817	0.00512153	0.531033	2.2906	potassium channel tetramerization domain containing 11 [Source:HGNC Symbol;Acc:HGNC:21302]	#	RHBG	ENSOCUG00000016130	409.412	217.719	601.105	2.76092	1.46515	8.4989	0.0126525	0.926216	1.89782	Oryctolagus cuniculus Rh family, B glycoprotein (gene/pseudogene) (RHBG), mRNA. [Source:RefSeq mRNA;Acc:NM_001082136]	#		ENSOCUG00000000277	10.3496	13.3687	7.33055	0.548336	-0.866868	3.30735	0.705354	1	0.151593
AKR1B19	ENSOCUG00000026383	476.856	685.624	268.089	0.391014	-1.35471	8.74392	0.0188384	1	1.72496	Uncharacterized protein [Source:UniProtKB/TrEMBL;Acc:G1TV43]	#	NT5DC3	ENSOCUG00000016271	293.677	174.748	412.605	2.36114	1.23948	8.06888	0.0421526	1	1.37518	5'-nucleotidase domain containing 3 [Source:HGNC Symbol;Acc:HGNC:30826]	#		ENSOCUG00000000278	552.868	586.314	519.422	0.885911	-0.174767	9.10815	0.757246	1	0.120763
-	ENSOCUG00000026419	416.794	660.796	172.791	0.26149	-1.93517	8.40048	0.00116692	0.199634	2.93296	Uncharacterized protein [Source:UniProtKB/TrEMBL;Acc:G1TVU6]	#	ALB	ENSOCUG00000016287	25.4723	3.81963	47.1249	12.3376	3.62499	3.74593	0.0133425	0.96244	1.87476	Oryctolagus cuniculus albumin (ALB), mRNA. [Source:RefSeq mRNA;Acc:NM_001082344]	#		ENSOCUG00000000280	7.34644	10.504	4.18888	0.39879	-1.3263	2.72972	0.635847	1	0.196647
-	ENSOCUG00000026601	172.465	255.915	89.0138	0.347825	-1.52357	7.23774	0.0243395	1	1.61369	-	#	PHOSPHO1	ENSOCUG00000016347	122.281	59.2043	185.358	3.13082	1.64654	6.7109	0.0250349	1	1.60145	phosphatase, orphan 1 [Source:HGNC Symbol;Acc:HGNC:16815]	#		ENSOCUG00000000281	50.8235	53.4749	48.1722	0.900838	-0.150661	5.66546	0.894774	1	0.0482865
-	ENSOCUG00000026786	486.025	799.258	172.791	0.21619	-2.20963	8.5377	0.000191874	0.059684	3.71698	Uncharacterized protein [Source:UniProtKB/TrEMBL;Acc:G1TU60]	#	TP63	ENSOCUG00000016465	709.313	447.852	970.774	2.16762	1.11611	9.36493	0.0439445	1	1.3571	tumor protein p63 [Source:HGNC Symbol;Acc:HGNC:15979]	#		ENSOCUG00000000285	414.963	362.865	467.061	1.28715	0.364176	8.68538	0.529137	1	0.276432
-	ENSOCUG00000026795	256.559	433.528	79.5888	0.183584	-2.44549	7.53724	0.000173065	0.05491	3.76179	Uncharacterized protein [Source:UniProtKB/TrEMBL;Acc:G1TMH2]	#	DDR1	ENSOCUG00000016487	2107.2	1198.41	3016	2.51667	1.33151	10.8927	0.011921	0.892051	1.92369	discoidin domain receptor tyrosine kinase 1 [Source:HGNC Symbol;Acc:HGNC:2730]	#		ENSOCUG00000000286	475.846	489.868	461.824	0.942753	-0.0850481	8.89372	0.884503	1	0.0533009
CPZ	ENSOCUG00000026821	1375.87	2051.14	700.591	0.341561	-1.54978	10.2273	0.00412516	0.457633	2.38456	carboxypeptidase Z [Source:HGNC Symbol;Acc:HGNC:2333]	#	CPVL	ENSOCUG00000016573	438.858	236.817	640.899	2.7063	1.43632	8.60579	0.0136939	0.9657	1.86347	carboxypeptidase, vitellogenic-like [Source:HGNC Symbol;Acc:HGNC:14399]	#		ENSOCUG00000000289	543.844	599.682	488.005	0.813772	-0.297303	9.0794	0.597534	1	0.223637
-	ENSOCUG00000026992	7968.05	10751.3	5184.79	0.482247	-1.05215	12.8661	0.0413995	1	1.383	Elongation factor 1-alpha [Source:UniProtKB/TrEMBL;Acc:G1U6W1]	#	HSD17B2	ENSOCUG00000016655	57.3823	15.2785	99.486	6.51149	2.70299	5.28493	0.00558633	0.568086	2.25287	hydroxysteroid (17-beta) dehydrogenase 2 [Source:HGNC Symbol;Acc:HGNC:5211]	#		ENSOCUG00000000290	662.096	449.762	874.43	1.94421	0.959181	9.29261	0.0840528	1	1.07545
-	ENSOCUG00000027099	429.33	672.255	186.405	0.277284	-1.85057	8.46758	0.00177947	0.261384	2.74971	Uncharacterized protein [Source:UniProtKB/TrEMBL;Acc:G1U945]	#	NELL2	ENSOCUG00000016727	23.8553	4.77454	42.9361	8.99271	3.16876	3.83974	0.0301118	1	1.52126	NEL-like 2 (chicken) [Source:HGNC Symbol;Acc:HGNC:7751]	#		ENSOCUG00000000291	484.424	496.552	472.297	0.951152	-0.0722522	8.91968	0.902182	1	0.0447056
CKM	ENSOCUG00000027154	29.9714	51.565	8.37777	0.16247	-2.62176	4.37744	0.0398691	1	1.39936	creatine kinase, muscle [Source:HGNC Symbol;Acc:HGNC:1994]	#	IL1R2	ENSOCUG00000016746	685.332	391.512	979.152	2.50095	1.32247	9.27415	0.0177916	1	1.74979	interleukin 1 receptor, type II [Source:HGNC Symbol;Acc:HGNC:5994]	#		ENSOCUG00000000292	7.57722	5.72945	9.42499	1.64501	0.718095	2.87744	0.815393	1	0.088633
-	ENSOCUG00000027285	82.3975	126.048	38.7472	0.3074	-1.70181	6.12692	0.0394173	1	1.40431	Uncharacterized protein [Source:UniProtKB/TrEMBL;Acc:G1SCS6]	#	RAMP1	ENSOCUG00000016751	90.7708	28.6472	152.894	5.33714	2.41607	6.04836	0.00337803	0.394037	2.47134	receptor (G protein-coupled) activity modifying protein 1 [Source:HGNC Symbol;Acc:HGNC:9843]	#		ENSOCUG00000000298	975.303	1011.25	939.357	0.928909	-0.106391	9.92873	0.844738	1	0.0732781
-	ENSOCUG00000027394	316.21	564.351	68.0694	0.120615	-3.05151	7.61469	2.64121e-06	0.00190455	5.5782	Uncharacterized protein [Source:UniProtKB/TrEMBL;Acc:G1TRK9]	#	FERMT1	ENSOCUG00000016883	211.266	103.13	319.402	3.09708	1.63091	7.50378	0.0122482	0.912234	1.91193	fermitin family member 1 [Source:HGNC Symbol;Acc:HGNC:15889]	#		ENSOCUG00000000300	763.433	855.598	671.269	0.784561	-0.350042	9.56577	0.522251	1	0.282121
C8orf4	ENSOCUG00000027445	186.295	273.104	99.486	0.364279	-1.45688	7.36486	0.0283714	1	1.54712	chromosome 8 open reading frame 4 [Source:HGNC Symbol;Acc:HGNC:1357]	#	-	ENSOCUG00000016943	7778.68	4258.89	11298.5	2.65291	1.40758	12.7601	0.00680854	0.675067	2.16695	Uncharacterized protein [Source:UniProtKB/TrEMBL;Acc:G1TCN5]	#		ENSOCUG00000000301	310.163	342.812	277.514	0.809521	-0.304859	8.26884	0.613186	1	0.212407
SOBP	ENSOCUG00000027804	28.0154	48.7003	7.33055	0.150524	-2.73194	4.23989	0.0392224	1	1.40647	sine oculis binding protein homolog (Drosophila) [Source:HGNC Symbol;Acc:HGNC:29256]	#	GDPD2	ENSOCUG00000017133	156.717	72.573	240.861	3.31888	1.73069	7.04671	0.0126695	0.926216	1.89724	glycerophosphodiester phosphodiesterase domain containing 2 [Source:HGNC Symbol;Acc:HGNC:25974]	#		ENSOCUG00000000302	134.326	91.6712	176.98	1.9306	0.949049	6.99292	0.17911	1	0.746881
ASPN	ENSOCUG00000028053	1535.83	2478.94	592.727	0.239105	-2.06428	10.2434	0.000160955	0.05211	3.7933	asporin [Source:HGNC Symbol;Acc:HGNC:14872]	#	ACSM1	ENSOCUG00000017141	42.2437	14.3236	70.1638	4.89847	2.29233	4.98649	0.0328355	1	1.48366	acyl-CoA synthetase medium-chain family member 1 [Source:HGNC Symbol;Acc:HGNC:18049]	#		ENSOCUG00000000304	248.172	238.727	257.616	1.07913	0.109862	7.95415	0.86518	1	0.0628935
PRC1	ENSOCUG00000028094	291.316	407.746	174.886	0.428909	-1.22126	8.0609	0.0456461	1	1.3406	protein regulator of cytokinesis 1 [Source:HGNC Symbol;Acc:HGNC:9341]	#	CCDC64B	ENSOCUG00000017209	693.31	410.611	976.01	2.37697	1.24913	9.30619	0.0248088	1	1.60539	coiled-coil domain containing 64B [Source:HGNC Symbol;Acc:HGNC:33584]	#		ENSOCUG00000000305	86.2921	88.8065	83.7777	0.943374	-0.0840987	6.43054	0.93094	1	0.0310784
-	ENSOCUG00000028212	17.2345	33.4218	1.04722	0.0313335	-4.99615	2.56464	0.0153966	0.996949	1.81257	-	#	-	ENSOCUG00000017233	373.42	182.387	564.452	3.0948	1.62984	8.32579	0.00632622	0.635184	2.19886	-	#		ENSOCUG00000000306	932.061	1060.9	803.219	0.757108	-0.401428	9.85036	0.457169	1	0.339923
-	ENSOCUG00000029292	111.524	216.764	6.28333	0.0289869	-5.10845	5.20576	5.77433e-08	6.54315e-05	7.2385	Uncharacterized protein [Source:UniProtKB/TrEMBL;Acc:U3KM01]	#	MT4	ENSOCUG00000017271	5065.86	2438.84	7692.89	3.15433	1.65733	12.0806	0.00162337	0.247554	2.78958	metallothionein 4 [Source:HGNC Symbol;Acc:HGNC:18705]	#		ENSOCUG00000000307	499.91	349.496	650.324	1.86075	0.895882	8.89707	0.114927	1	0.939578
-	ENSOCUG00000029664	210.476	336.128	84.8249	0.252359	-1.98645	7.39964	0.00265649	0.338214	2.57569	Uncharacterized protein [Source:UniProtKB/TrEMBL;Acc:U3KLT3]	#	HTR4	ENSOCUG00000017309	195.787	65.8887	325.686	4.94297	2.30538	7.19465	0.000672487	0.144167	3.17232	5-hydroxytryptamine (serotonin) receptor 4, G protein-coupled [Source:HGNC Symbol;Acc:HGNC:5299]	#		ENSOCUG00000000310	38.1789	33.4218	42.9361	1.28467	0.361401	5.24342	0.753182	1	0.1231
ZACN	ENSOCUG00000000422	17.6658	35.3316	0	0	#NAME?	#NUM!	0.00397907	0.444534	2.40022	zinc activated ligand-gated ion channel [Source:HGNC Symbol;Acc:HGNC:29504]	#	SLC6A2	ENSOCUG00000017310	205.967	61.1141	350.819	5.74039	2.52115	7.19401	0.000200563	0.0600328	3.69775	solute carrier family 6 (neurotransmitter transporter), member 2 [Source:HGNC Symbol;Acc:HGNC:11048]	#		ENSOCUG00000000312	2797.14	3282.02	2312.26	0.704525	-0.505278	11.4277	0.330073	1	0.48139
ST6GALNAC5	ENSOCUG00000005692	12.4138	24.8276	0	0	#NAME?	#NUM!	0.0202306	1	1.69399	ST6 (alpha-N-acetyl-neuraminyl-2,3-beta-galactosyl-1,3)-N-acetylgalactosaminide alpha-2,6-sialyltransferase 5 [Source:HGNC Symbol;Acc:HGNC:19342]	#	KRT5	ENSOCUG00000017421	44731.1	29149.5	60312.6	2.06908	1.04899	15.3557	0.0407671	1	1.38969	keratin 5 [Source:HGNC Symbol;Acc:HGNC:6442]	#		ENSOCUG00000000315	26.3508	18.1433	34.5583	1.90475	0.929599	4.64616	0.471281	1	0.32672
-	ENSOCUG00000007393	105.995	211.99	0	0	#NAME?	#NUM!	3.408e-11	6.00717e-08	10.4675	-	#	-	ENSOCUG00000017453	484.847	303.661	666.033	2.19334	1.13313	8.81288	0.0477686	1	1.32086	Uncharacterized protein [Source:UniProtKB/TrEMBL;Acc:G1TDR0]	#		ENSOCUG00000000318	202.387	243.502	161.272	0.662304	-0.594435	7.63057	0.356966	1	0.447373
MYPN	ENSOCUG00000009939	10.0265	20.0531	0	0	#NAME?	#NUM!	0.0436418	1	1.3601	myopalladin [Source:HGNC Symbol;Acc:HGNC:23246]	#	CBS	ENSOCUG00000017653	139.853	63.9789	215.728	3.37186	1.75354	6.87629	0.0139584	0.973257	1.85516	cystathionine beta-synthase [Source:RefSeq peptide;Acc:NP_001075551]	#		ENSOCUG00000000320	66.301	58.2494	74.3527	1.27645	0.352142	6.04024	0.695231	1	0.157871
-	ENSOCUG00000016758	11.9364	23.8727	0	0	#NAME?	#NUM!	0.0235579	1	1.62786	Uncharacterized protein [Source:UniProtKB/TrEMBL;Acc:G1TCB5]	#	CYP1A1	ENSOCUG00000017744	31.8941	0.954908	62.8333	65.8003	6.04002	2.95345	0.000260798	0.0738803	3.5837	Oryctolagus cuniculus polycyclic hydrocarbon-inducible cytochrome P450c (LOC100328613), mRNA. [Source:RefSeq mRNA;Acc:NM_001171072]	#		ENSOCUG00000000321	322.158	311.3	333.016	1.06976	0.0972868	8.33081	0.87501	1	0.0579871
PLEKHB2	ENSOCUG00000024282	233.953	467.905	0	0	#NAME?	#NUM!	2.66615e-17	8.45915e-14	16.5741	pleckstrin homology domain containing, family B (evectins) member 2 [Source:HGNC Symbol;Acc:HGNC:19236]	#	SGPL1	ENSOCUG00000017791	4439.73	2729.13	6150.33	2.25359	1.17222	12.0003	0.0242209	1	1.61581	sphingosine-1-phosphate lyase 1 [Source:HGNC Symbol;Acc:HGNC:10817]	#		ENSOCUG00000000322	240.903	248.276	233.53	0.940607	-0.0883359	7.91163	0.893683	1	0.0488163
													-	ENSOCUG00000018810	45.7546	6.68436	84.8249	12.6901	3.66563	4.5736	0.00123443	0.20833	2.90853	-	#		ENSOCUG00000000323	725.713	747.693	703.733	0.941205	-0.087419	9.50259	0.875513	1	0.0577374
													-	ENSOCUG00000020957	204.841	41.0611	368.622	8.97741	3.1663	6.94285	6.46431e-06	0.00394422	5.18948	Uncharacterized protein [Source:UniProtKB/TrEMBL;Acc:G1TRS5]	#		ENSOCUG00000000324	502.151	508.966	495.336	0.973219	-0.0391633	8.97184	0.948501	1	0.0229624
													CSTB	ENSOCUG00000020975	9839.12	6262.29	13415.9	2.14234	1.09919	13.1621	0.0330317	1	1.48107	cystatin B (stefin B) [Source:HGNC Symbol;Acc:HGNC:2482]	#		ENSOCUG00000000325	212.858	211.035	214.68	1.01727	0.0247096	7.73369	0.977248	1	0.00999536
													-	ENSOCUG00000020989	53.8714	22.9178	84.8249	3.70127	1.88802	5.46241	0.0491602	1	1.30839	Uncharacterized protein [Source:UniProtKB/TrEMBL;Acc:G1TNV4]	#		ENSOCUG00000000326	183.457	190.982	175.933	0.921204	-0.118407	7.51809	0.864314	1	0.0633283
													HYI	ENSOCUG00000021143	268.542	142.281	394.802	2.7748	1.47238	7.88879	0.0179284	1	1.74646	hydroxypyruvate isomerase (putative) [Source:HGNC Symbol;Acc:HGNC:26948]	#		ENSOCUG00000000328	527.819	422.069	633.569	1.5011	0.586021	9.01435	0.298417	1	0.525177
													DUSP9	ENSOCUG00000021158	13.0441	0.954908	25.1333	26.3201	4.71809	2.29248	0.0413576	1	1.38344	dual specificity phosphatase 9 [Source:HGNC Symbol;Acc:HGNC:3076]	#		ENSOCUG00000000329	1354.11	1168.81	1539.41	1.31708	0.397345	10.3895	0.453311	1	0.343604
													PPP1R13L	ENSOCUG00000021159	796.291	392.467	1200.12	3.05787	1.61253	9.42269	0.00376767	0.426931	2.42393	protein phosphatase 1, regulatory subunit 13 like [Source:HGNC Symbol;Acc:HGNC:18838]	#		ENSOCUG00000000330	3.86579	6.68436	1.04722	0.156667	-2.67422	1.40368	0.573117	1	0.241757
													-	ENSOCUG00000021166	127.546	15.2785	239.814	15.6961	3.97234	5.9196	1.41183e-06	0.00106654	5.85022	Uncharacterized protein [Source:UniProtKB/TrEMBL;Acc:G1SRS9]	#		ENSOCUG00000000331	111.642	105.995	117.289	1.10655	0.146071	6.80089	0.853917	1	0.0685841
													PKP1	ENSOCUG00000021242	9741.36	6334.86	13147.9	2.07548	1.05344	13.1558	0.0408792	1	1.3885	plakophilin 1 [Source:HGNC Symbol;Acc:HGNC:9023]	#		ENSOCUG00000000333	16.4642	27.6923	5.23611	0.189081	-2.40292	3.58995	0.157207	1	0.803529
													USP35	ENSOCUG00000021262	204.752	107.905	301.6	2.79506	1.48288	7.49505	0.022939	1	1.63943	ubiquitin specific peptidase 35 [Source:HGNC Symbol;Acc:HGNC:20061]	#		ENSOCUG00000000334	619.92	574.855	664.985	1.15679	0.210125	9.27212	0.706421	1	0.150936
													TRIM29	ENSOCUG00000021297	5175.78	3295.39	7056.18	2.14123	1.09844	12.2355	0.0340923	1	1.46734	tripartite motif containing 29 [Source:HGNC Symbol;Acc:HGNC:17274]	#		ENSOCUG00000000336	214.153	249.231	179.075	0.718509	-0.476921	7.72288	0.45558	1	0.341435
													-	ENSOCUG00000021375	234.254	6.68436	461.824	69.0903	6.11041	5.79599	3.60323e-13	7.14521e-10	12.4433	-	#		ENSOCUG00000000338	526.325	409.656	642.994	1.5696	0.650393	9.00346	0.248781	1	0.604183
													C1orf106	ENSOCUG00000021508	497.767	285.518	710.016	2.48677	1.31427	8.81457	0.0218896	1	1.65976	chromosome 1 open reading frame 106 [Source:HGNC Symbol;Acc:HGNC:25599]	#		ENSOCUG00000000339	236.005	219.629	252.38	1.14912	0.200531	7.87919	0.75309	1	0.123153
													RASD2	ENSOCUG00000021520	84.9187	30.5571	139.28	4.55804	2.18841	6.02764	0.0085426	0.752888	2.06841	RASD family, member 2 [Source:HGNC Symbol;Acc:HGNC:18229]	#		ENSOCUG00000000341	3.5268	2.86472	4.18888	1.46223	0.54817	1.79248	0.969829	1	0.0133048
													ALOX12	ENSOCUG00000021659	1557.72	802.123	2313.31	2.88399	1.52806	10.4117	0.00445372	0.477391	2.35128	arachidonate 12-lipoxygenase [Source:HGNC Symbol;Acc:HGNC:429]	#		ENSOCUG00000000343	576.756	644.563	508.949	0.789604	-0.340799	9.16178	0.542511	1	0.265592
													DMPK	ENSOCUG00000021669	691.448	438.303	944.593	2.15512	1.10777	9.32967	0.0459145	1	1.33805	dystrophia myotonica-protein kinase [Source:HGNC Symbol;Acc:HGNC:2933]	#		ENSOCUG00000000344	133.204	136.552	129.855	0.95096	-0.072543	7.05703	0.929058	1	0.0319572
													-	ENSOCUG00000021750	40.7493	1.90982	79.5888	41.6735	5.38106	3.62396	0.000101123	0.0373073	3.99515	Uncharacterized protein [Source:UniProtKB/TrEMBL;Acc:G1T503]	#		ENSOCUG00000000345	6.71462	1.90982	11.5194	6.0317	2.59256	2.22972	0.38258	1	0.417277
													-	ENSOCUG00000021764	161.646	89.7614	233.53	2.60168	1.37944	7.17774	0.0431698	1	1.36482	-	#		ENSOCUG00000000346	372.813	379.099	366.527	0.966839	-0.0486521	8.5421	0.93843	1	0.0275982
													EML2	ENSOCUG00000021801	300.113	149.921	450.305	3.00362	1.5867	8.02141	0.00973268	0.795872	2.01177	echinoderm microtubule associated protein like 2 [Source:HGNC Symbol;Acc:HGNC:18035]	#		ENSOCUG00000000347	921.075	941.54	900.61	0.956529	-0.064119	9.84682	0.907333	1	0.0422333
													UBE2L6	ENSOCUG00000021867	271.098	132.732	409.463	3.08488	1.62522	7.86498	0.00919472	0.771773	2.03646	ubiquitin-conjugating enzyme E2L 6 [Source:HGNC Symbol;Acc:HGNC:12490]	#		ENSOCUG00000000348	498.602	365.73	631.474	1.72661	0.787946	8.90861	0.165087	1	0.782286
													CSRNP1	ENSOCUG00000022080	1160.74	749.603	1571.88	2.09695	1.06829	10.0841	0.0469702	1	1.32818	cysteine-serine-rich nuclear protein 1 [Source:HGNC Symbol;Acc:HGNC:14300]	#		ENSOCUG00000000349	33.0813	30.5571	35.6055	1.16521	0.220595	5.04373	0.870841	1	0.0600613
													-	ENSOCUG00000022109	385.019	234.907	535.13	2.27805	1.1878	8.46985	0.0432859	1	1.36365	Cellular tumor antigen p53 [Source:UniProtKB/TrEMBL;Acc:G1U940]	#		ENSOCUG00000000353	248.48	254.006	242.955	0.956496	-0.0641694	7.95663	0.924169	1	0.0342485
													FXYD1	ENSOCUG00000022123	359.099	218.674	499.524	2.28433	1.19177	8.36852	0.0444051	1	1.35257	FXYD domain containing ion transport regulator 1 [Source:HGNC Symbol;Acc:HGNC:4025]	#		ENSOCUG00000000354	207.22	197.666	216.775	1.09667	0.133132	7.69349	0.841736	1	0.0748243
													COL26A1	ENSOCUG00000022293	180.649	64.9338	296.364	4.56409	2.19033	7.11606	0.0013981	0.223742	2.85446	collagen, type XXVI, alpha 1 [Source:HGNC Symbol;Acc:HGNC:18038]	#		ENSOCUG00000000355	90.8979	112.679	69.1166	0.613393	-0.705117	6.46352	0.371051	1	0.430566
													WNT4	ENSOCUG00000022473	145.151	73.5279	216.775	2.9482	1.55983	6.98014	0.0264109	1	1.57822	wingless-type MMTV integration site family, member 4 [Source:HGNC Symbol;Acc:HGNC:12783]	#		ENSOCUG00000000356	623.558	651.247	595.869	0.914965	-0.128211	9.28296	0.819403	1	0.0865022
													CATSPERG	ENSOCUG00000022774	114.997	58.2494	171.744	2.94843	1.55995	6.64414	0.0361795	1	1.44154	catsper channel auxiliary subunit gamma [Source:HGNC Symbol;Acc:HGNC:25243]	#		ENSOCUG00000000357	214.613	207.215	222.011	1.0714	0.0995013	7.74474	0.882531	1	0.05427
													ART1	ENSOCUG00000022791	156.192	40.1061	272.277	6.78892	2.76318	6.70734	0.0001448	0.0484541	3.83923	Oryctolagus cuniculus ADP-ribosyltransferase 1 (ART1), mRNA. [Source:RefSeq mRNA;Acc:NM_001082670]	#		ENSOCUG00000000358	899.575	920.532	878.618	0.954469	-0.0672303	9.81271	0.902929	1	0.0443466
													TSGA10IP	ENSOCUG00000022795	18.7577	1.90982	35.6055	18.6434	4.22059	3.04373	0.0189524	1	1.72233	testis specific, 10 interacting protein [Source:HGNC Symbol;Acc:HGNC:26555]	#		ENSOCUG00000000359	1714.37	1710.24	1718.49	1.00482	0.00694193	10.7435	0.990685	1	0.00406446
													-	ENSOCUG00000022888	229.249	1.90982	456.588	239.074	7.90132	4.88409	1.18774e-15	2.69175e-12	14.9253	Uncharacterized protein [Source:UniProtKB/TrEMBL;Acc:G1SCJ6]	#		ENSOCUG00000000361	1.52468	0.954908	2.09444	2.19334	1.13313	0.5	0.983403	1	0.00726868
													RORC	ENSOCUG00000022907	133.708	61.1141	206.303	3.37569	1.75518	6.81103	0.014937	0.991464	1.82574	RAR-related orphan receptor C [Source:HGNC Symbol;Acc:HGNC:10260]	#		ENSOCUG00000000363	1.00106	0.954908	1.04722	1.09667	0.133132	-1.1212e-15	1	1	0
													CAMSAP3	ENSOCUG00000022921	620.926	359.045	882.807	2.45876	1.29793	9.13699	0.0209096	1	1.67965	calmodulin regulated spectrin-associated protein family, member 3 [Source:HGNC Symbol;Acc:HGNC:29307]	#		ENSOCUG00000000364	479.464	458.356	500.572	1.0921	0.127108	8.90388	0.825842	1	0.0831032
													-	ENSOCUG00000023002	399.476	163.289	635.663	3.89286	1.96083	8.3317	0.00105846	0.188668	2.97532	Uncharacterized protein [Source:UniProtKB/TrEMBL;Acc:G1U454]	#		ENSOCUG00000000365	125.488	133.687	117.289	0.877338	-0.188796	6.96832	0.800898	1	0.0964226
													XYLB	ENSOCUG00000023112	191.092	108.86	273.325	2.5108	1.32815	7.4304	0.0435373	1	1.36114	xylulokinase homolog (H. influenzae) [Source:HGNC Symbol;Acc:HGNC:12839]	#		ENSOCUG00000000367	201.4	220.584	182.216	0.826065	-0.275674	7.64735	0.672877	1	0.172064
													PDZK1IP1	ENSOCUG00000023194	564.822	338.992	790.652	2.33236	1.22179	9.016	0.030715	1	1.51265	PDZK1 interacting protein 1 [Source:HGNC Symbol;Acc:HGNC:16887]	#		ENSOCUG00000000368	52.041	71.6181	32.4639	0.453291	-1.14149	5.59151	0.232838	1	0.632946
													CST6	ENSOCUG00000023396	2452.07	1451.46	3452.69	2.37877	1.25021	11.1284	0.0175747	1	1.75511	cystatin E/M [Source:HGNC Symbol;Acc:HGNC:2478]	#		ENSOCUG00000000371	111.117	73.5279	148.705	2.02243	1.01609	6.70827	0.171241	1	0.766393
													RAPGEFL1	ENSOCUG00000023409	1669.44	1058.04	2280.85	2.15573	1.10818	10.6013	0.0367229	1	1.43506	Rap guanine nucleotide exchange factor (GEF)-like 1 [Source:HGNC Symbol;Acc:HGNC:17428]	#		ENSOCUG00000000374	347.048	370.504	323.591	0.87338	-0.195318	8.43569	0.743774	1	0.128559
													-	ENSOCUG00000023425	104.399	6.68436	202.114	30.2368	4.91823	5.19991	1.54427e-07	0.000153114	6.81128	Uncharacterized protein [Source:UniProtKB/TrEMBL;Acc:G1TZC1]	#		ENSOCUG00000000375	31.711	37.2414	26.1805	0.702995	-0.508414	4.96463	0.677934	1	0.168813
													-	ENSOCUG00000023532	406.379	226.313	586.444	2.59129	1.37367	8.50901	0.019206	1	1.71656	-	#		ENSOCUG00000000377	264.603	212.945	316.261	1.48518	0.570637	8.01965	0.353316	1	0.451837
													-	ENSOCUG00000023535	150.31	53.4749	247.144	4.62169	2.20842	6.845	0.00198497	0.281933	2.70225	-	#		ENSOCUG00000000380	1932.97	2322.34	1543.6	0.664677	-0.589275	10.8867	0.26073	1	0.583809
													-	ENSOCUG00000023544	25.5184	2.86472	48.1722	16.8156	4.07173	3.55426	0.0073518	0.690112	2.13361	Uncharacterized protein [Source:UniProtKB/TrEMBL;Acc:G1TN87]	#		ENSOCUG00000000381	260.539	264.51	256.569	0.969981	-0.0439722	8.02519	0.94966	1	0.0224318
													-	ENSOCUG00000023549	24.0399	0.954908	47.1249	49.3502	5.62499	2.74593	0.00199045	0.281933	2.70105	-	#		ENSOCUG00000000382	769.434	731.46	807.407	1.10383	0.142519	9.58589	0.79566	1	0.0992724
													RBP1	ENSOCUG00000023550	501.847	276.923	726.771	2.62445	1.39201	8.80935	0.0153095	0.996949	1.81504	retinol binding protein 1, cellular [Source:HGNC Symbol;Acc:HGNC:9919]	#		ENSOCUG00000000383	719.576	592.998	846.155	1.42691	0.512894	9.46833	0.350255	1	0.455616
													-	ENSOCUG00000023579	506.522	126.048	886.996	7.03698	2.81496	8.38531	3.28547e-06	0.00226611	5.4834	Uncharacterized protein [Source:UniProtKB/TrEMBL;Acc:G1TY37]	#		ENSOCUG00000000384	22.5629	31.512	13.6139	0.432022	-1.21082	4.37242	0.384668	1	0.414914
													FAM89A	ENSOCUG00000023617	160.583	79.2574	241.908	3.05218	1.60984	7.11339	0.0192457	1	1.71567	family with sequence similarity 89, member A [Source:HGNC Symbol;Acc:HGNC:25057]	#		ENSOCUG00000000385	238.056	285.518	190.594	0.667539	-0.583075	7.8659	0.351801	1	0.453703
													-	ENSOCUG00000023708	65.098	18.1433	112.053	6.17599	2.62667	5.4947	0.00466726	0.493609	2.33094	Uncharacterized protein [Source:UniProtKB/TrEMBL;Acc:G1T6L1]	#		ENSOCUG00000000386	47.2649	29.6022	64.9277	2.19334	1.13313	5.4542	0.252769	1	0.597277
													SCN4B	ENSOCUG00000023857	26.9508	5.72945	48.1722	8.40782	3.07173	4.05426	0.0248616	1	1.60447	sodium channel, voltage gated, type IV beta subunit [Source:HGNC Symbol;Acc:HGNC:10592]	#		ENSOCUG00000000387	2.95704	3.81963	2.09444	0.548336	-0.866868	1.5	0.930457	1	0.0313035
													COL6A5	ENSOCUG00000024036	60.9855	5.72945	116.242	20.2884	4.34259	4.68969	5.03396e-05	0.022183	4.29809	collagen, type VI, alpha 5 [Source:HGNC Symbol;Acc:HGNC:26674]	#		ENSOCUG00000000388	64.3769	76.3927	52.3611	0.68542	-0.54494	5.98289	0.541087	1	0.266733
													ACKR1	ENSOCUG00000024046	307.968	182.387	433.55	2.37708	1.24919	8.13546	0.0392515	1	1.40614	atypical chemokine receptor 1 (Duffy blood group) [Source:HGNC Symbol;Acc:HGNC:4035]	#		ENSOCUG00000000389	1.00106	0.954908	1.04722	1.09667	0.133132	-1.1212e-15	1	1	0
													CELSR1	ENSOCUG00000024142	489.819	254.96	724.677	2.84231	1.50706	8.74766	0.00902947	0.766008	2.04434	cadherin, EGF LAG seven-pass G-type receptor 1 [Source:HGNC Symbol;Acc:HGNC:1850]	#		ENSOCUG00000000391	10.6266	7.63927	13.6139	1.78209	0.833572	3.35022	0.710756	1	0.148279
													IZUMO1	ENSOCUG00000024222	130.797	56.3396	205.255	3.64318	1.8652	6.74868	0.0104014	0.823716	1.98291	izumo sperm-egg fusion 1 [Source:HGNC Symbol;Acc:HGNC:28539]	#		ENSOCUG00000000392	105.759	119.364	92.1555	0.772057	-0.373221	6.71261	0.624848	1	0.204225
													AP1M2	ENSOCUG00000024334	204.568	111.724	297.411	2.66201	1.41251	7.51006	0.0299763	1	1.52322	adaptor-related protein complex 1, mu 2 subunit [Source:HGNC Symbol;Acc:HGNC:558]	#		ENSOCUG00000000397	319.234	360.955	277.514	0.768831	-0.379262	8.30605	0.526655	1	0.278474
													GSTM2	ENSOCUG00000024443	336.444	189.072	483.816	2.5589	1.35552	8.24055	0.02392	1	1.62124	glutathione S-transferase Mu 1 [Source:RefSeq peptide;Acc:NP_001075721]	#		ENSOCUG00000000398	11.6276	8.59417	14.6611	1.70593	0.770562	3.48864	0.718066	1	0.143836
													ETV7	ENSOCUG00000024492	113.225	51.565	174.886	3.39156	1.76195	6.5693	0.0192452	1	1.71568	ets variant 7 [Source:HGNC Symbol;Acc:HGNC:18160]	#		ENSOCUG00000000401	65.4861	85.9417	45.0305	0.523965	-0.932456	5.95906	0.288096	1	0.540463
													-	ENSOCUG00000024499	51.761	12.4138	91.1082	7.33927	2.87564	5.07169	0.00498674	0.523905	2.30218	Uncharacterized protein [Source:UniProtKB/TrEMBL;Acc:G1T7Q5]	#		ENSOCUG00000000403	938.827	845.094	1032.56	1.22183	0.289042	9.86749	0.592426	1	0.227366
													-	ENSOCUG00000024631	83.9018	19.0982	148.705	7.78637	2.96095	5.73584	0.000666848	0.144167	3.17597	Uncharacterized protein [Source:UniProtKB/TrEMBL;Acc:G1U7A3]	#		ENSOCUG00000000404	658.642	683.714	633.569	0.926657	-0.109892	9.3623	0.844504	1	0.0733984
													-	ENSOCUG00000024778	14.0913	0.954908	27.2277	28.5135	4.83357	2.35022	0.0307438	1	1.51224	Uncharacterized protein [Source:UniProtKB/TrEMBL;Acc:G1U771]	#		ENSOCUG00000000405	177.745	222.494	132.997	0.597757	-0.742369	7.42644	0.26243	1	0.580987
													CBLC	ENSOCUG00000024783	101.598	42.9709	160.225	3.72868	1.89867	6.37462	0.0148612	0.991464	1.82795	Cbl proto-oncogene C, E3 ubiquitin protein ligase [Source:HGNC Symbol;Acc:HGNC:15961]	#		ENSOCUG00000000406	130.277	121.273	139.28	1.14848	0.19973	7.02198	0.786403	1	0.104355
													RPL18A	ENSOCUG00000024833	884.065	548.117	1220.01	2.22582	1.15434	9.67551	0.034667	1	1.46008	ribosomal protein L18a [Source:HGNC Symbol;Acc:HGNC:10311]	#		ENSOCUG00000000407	9.48704	9.54908	9.42499	0.987005	-0.0188711	3.24593	1	1	0
													KIAA1456	ENSOCUG00000024898	277.811	102.175	453.447	4.43793	2.14989	7.74985	0.000689976	0.145944	3.16117	KIAA1456 [Source:HGNC Symbol;Acc:HGNC:26725]	#		ENSOCUG00000000408	277.572	258.78	296.364	1.14523	0.195641	8.1134	0.751977	1	0.123795
													ACSBG1	ENSOCUG00000024977	1594.24	934.855	2253.62	2.41066	1.26943	10.5033	0.017289	1	1.76223	acyl-CoA synthetase bubblegum family member 1 [Source:HGNC Symbol;Acc:HGNC:29567]	#		ENSOCUG00000000409	80498.9	84883.7	76114.1	0.896687	-0.157323	16.2945	0.756436	1	0.121228
													-	ENSOCUG00000025191	775.659	472.68	1078.64	2.28196	1.19028	9.47986	0.0308958	1	1.5101	Uncharacterized protein [Source:UniProtKB/TrEMBL;Acc:G1U1V1]	#		ENSOCUG00000000410	325.575	273.104	378.047	1.38426	0.469116	8.32786	0.431399	1	0.365121
													PHLDB3	ENSOCUG00000025320	424.582	239.682	609.483	2.54288	1.34646	8.57821	0.0209937	1	1.67791	pleckstrin homology-like domain, family B, member 3 [Source:HGNC Symbol;Acc:HGNC:30499]	#		ENSOCUG00000000412	152.116	146.101	158.13	1.08234	0.114149	7.2479	0.876197	1	0.0573981
													TFAP2B	ENSOCUG00000025542	52.3467	21.9629	82.7305	3.76683	1.91335	5.41367	0.0488065	1	1.31152	transcription factor AP-2 beta (activating enhancer binding protein 2 beta) [Source:HGNC Symbol;Acc:HGNC:11743]	#		ENSOCUG00000000416	656.781	743.874	569.688	0.76584	-0.384885	9.34647	0.486558	1	0.312865
													IVL	ENSOCUG00000025593	1875.7	842.229	2909.18	3.45414	1.78833	10.6122	0.000891212	0.171483	3.05002	involucrin [Source:HGNC Symbol;Acc:HGNC:6187]	#		ENSOCUG00000000418	5.86792	8.59417	3.14166	0.365557	-1.45183	2.37744	0.662119	1	0.179064
													MAL2	ENSOCUG00000025743	149.587	79.2574	219.916	2.77471	1.47234	7.04464	0.0343719	1	1.4638	mal, T-cell differentiation protein 2 (gene/pseudogene) [Source:HGNC Symbol;Acc:HGNC:13634]	#		ENSOCUG00000000423	3.04935	1.90982	4.18888	2.19334	1.13313	1.5	0.87468	1	0.0581508
													GABRD	ENSOCUG00000025868	20.8521	1.90982	39.7944	20.8368	4.38106	3.12396	0.0112167	0.855487	1.95014	gamma-aminobutyric acid (GABA) A receptor, delta [Source:HGNC Symbol;Acc:HGNC:4084]	#		ENSOCUG00000000425	502.676	541.433	463.919	0.856835	-0.22291	8.96918	0.695328	1	0.15781
													CCDC64	ENSOCUG00000025898	80.437	25.7825	135.092	5.23965	2.38947	5.88306	0.00517155	0.532737	2.28638	coiled-coil domain containing 64 [Source:HGNC Symbol;Acc:HGNC:28095]	#		ENSOCUG00000000426	106.56	113.634	99.486	0.875494	-0.19183	6.73234	0.807794	1	0.0926995
													-	ENSOCUG00000025918	48.5732	13.3687	83.7777	6.2667	2.64771	5.06464	0.010558	0.827306	1.97642	-	#		ENSOCUG00000000429	280.53	295.067	265.994	0.901471	-0.149646	8.13007	0.810254	1	0.0913787
													-	ENSOCUG00000026015	398.001	226.313	569.688	2.51726	1.33185	8.4881	0.0233783	1	1.63119	Uncharacterized protein [Source:UniProtKB/TrEMBL;Acc:G1SN51]	#		ENSOCUG00000000431	4152.03	5182.29	3121.77	0.602392	-0.731227	11.9738	0.156909	1	0.804353
													NAPRT	ENSOCUG00000026188	126.578	67.7985	185.358	2.73396	1.45099	6.80868	0.045073	1	1.34608	nicotinate phosphoribosyltransferase [Source:HGNC Symbol;Acc:HGNC:30450]	#		ENSOCUG00000000432	712.07	791.619	632.522	0.799023	-0.323692	9.46682	0.556173	1	0.25479
													FXYD3	ENSOCUG00000026229	923.099	423.024	1423.17	3.36428	1.7503	9.59975	0.00157946	0.244593	2.80149	FXYD domain containing ion transport regulator 3 [Source:HGNC Symbol;Acc:HGNC:4027]	#		ENSOCUG00000000435	30.0622	17.1883	42.9361	2.49797	1.32076	4.76374	0.273391	1	0.563215
													-	ENSOCUG00000026281	385	159.47	610.53	3.8285	1.93678	8.28553	0.00126841	0.211162	2.89674	Uncharacterized protein [Source:UniProtKB/TrEMBL;Acc:G1U2J1]	#		ENSOCUG00000000437	32.1884	38.1963	26.1805	0.68542	-0.54494	4.98289	0.651869	1	0.18584
													C2orf40	ENSOCUG00000026304	840.572	494.642	1186.5	2.39871	1.26226	9.58137	0.0216179	1	1.66519	chromosome 2 open reading frame 40 [Source:HGNC Symbol;Acc:HGNC:24642]	#		ENSOCUG00000000438	8.68649	15.2785	2.09444	0.137084	-2.86687	2.5	0.262994	1	0.580054
													GPNMB	ENSOCUG00000026334	2505.28	1509.71	3500.86	2.3189	1.21344	11.1668	0.0210166	1	1.67744	glycoprotein (transmembrane) nmb [Source:HGNC Symbol;Acc:HGNC:4462]	#		ENSOCUG00000000439	534.662	540.478	528.847	0.978479	-0.0313866	9.0624	0.959051	1	0.0181584
													-	ENSOCUG00000026362	60.586	24.8276	96.3443	3.88053	1.95625	5.612	0.0338447	1	1.47051	Uncharacterized protein [Source:UniProtKB/TrEMBL;Acc:G1TFH4]	#		ENSOCUG00000000440	54.6575	39.1512	70.1638	1.79212	0.841669	5.71182	0.369087	1	0.432872
													HR	ENSOCUG00000026384	2174.48	1019.84	3329.12	3.26434	1.70679	10.8475	0.00141038	0.223742	2.85066	hair growth associated [Source:HGNC Symbol;Acc:HGNC:5172]	#		ENSOCUG00000000442	185.751	165.199	206.303	1.24881	0.320556	7.52834	0.628008	1	0.202035
													-	ENSOCUG00000026450	462.777	283.608	641.947	2.2635	1.17856	8.73703	0.0406496	1	1.39094	-	#		ENSOCUG00000000444	227.485	157.56	297.411	1.88761	0.916557	7.75803	0.146922	1	0.832914
													ADH1	ENSOCUG00000026540	15.1385	0.954908	29.3222	30.7068	4.94049	2.40368	0.0228813	1	1.64052	Oryctolagus cuniculus alcohol dehydrogenase 1A (class I), alpha polypeptide (ADH1A), mRNA. [Source:RefSeq mRNA;Acc:NM_001101704]	#		ENSOCUG00000000445	4.34324	7.63927	1.04722	0.137084	-2.86687	1.5	0.507046	1	0.294953
													-	ENSOCUG00000026629	8353.11	4973.16	11733.1	2.35928	1.23834	12.8991	0.0167672	1	1.77554	Galectin [Source:UniProtKB/TrEMBL;Acc:G1TMP9]	#		ENSOCUG00000000446	460.471	363.82	557.122	1.53131	0.614767	8.81446	0.28195	1	0.549828
													5_8S_rRNA	ENSOCUG00000026713	34.7588	6.68436	62.8333	9.40005	3.23267	4.35712	0.00878725	0.760846	2.05615	5.8S ribosomal RNA [Source:RFAM;Acc:RF00002]	#		ENSOCUG00000000455	1495.19	1131.57	1858.82	1.64269	0.716064	10.5021	0.175931	1	0.754657
													RPL32	ENSOCUG00000026727	796.726	459.311	1134.14	2.46922	1.30406	9.49536	0.0181457	1	1.74123	Oryctolagus cuniculus ribosomal protein L32 (RPL32), mRNA. [Source:RefSeq mRNA;Acc:NM_001171505]	#		ENSOCUG00000000459	186.999	171.883	202.114	1.17588	0.233736	7.54216	0.725756	1	0.13921
													BCAM	ENSOCUG00000026791	2699.7	1582.28	3817.12	2.41241	1.27048	11.263	0.0156528	1	1.80541	basal cell adhesion molecule (Lutheran blood group) [Source:HGNC Symbol;Acc:HGNC:6722]	#		ENSOCUG00000000461	257.444	263.555	251.333	0.953628	-0.0685018	8.00771	0.917838	1	0.0372337
													SPRR3	ENSOCUG00000026830	4947.36	2767.32	7127.39	2.57555	1.36488	12.1167	0.00890626	0.763724	2.0503	small proline-rich protein 3 [Source:HGNC Symbol;Acc:HGNC:11268]	#		ENSOCUG00000000462	65.4543	64.9338	65.9749	1.01603	0.0229491	6.03237	0.999153	1	0.000368149
													SFRP1	ENSOCUG00000026917	1428.89	694.218	2163.56	3.11654	1.63995	10.2592	0.0024231	0.323026	2.61563	secreted frizzled-related protein 1 [Source:HGNC Symbol;Acc:HGNC:10776]	#		ENSOCUG00000000463	113.552	109.814	117.289	1.06806	0.0949969	6.82642	0.908992	1	0.0414399
													DLK1	ENSOCUG00000026936	773.974	334.218	1213.73	3.63155	1.86059	9.31494	0.000932693	0.172049	3.03026	delta-like 1 homolog (Drosophila) [Source:HGNC Symbol;Acc:HGNC:2907]	#		ENSOCUG00000000464	5.43662	6.68436	4.18888	0.62667	-0.674223	2.40368	0.88347	1	0.0538081
													HIST1H2BC	ENSOCUG00000027003	120.37	22.9178	217.822	9.50449	3.24861	6.1427	4.61374e-05	0.0209121	4.33595	histone cluster 1, H2bc [Source:HGNC Symbol;Acc:HGNC:4757]	#		ENSOCUG00000000466	141.551	148.011	135.092	0.912714	-0.131765	7.14368	0.858785	1	0.0661156
													-	ENSOCUG00000027082	270.522	3.81963	537.224	140.648	7.13595	5.50141	9.83486e-16	2.60034e-12	15.0072	Uncharacterized protein [Source:UniProtKB/TrEMBL;Acc:G1TRV3]	#		ENSOCUG00000000467	126.936	147.056	106.817	0.726367	-0.461229	6.96961	0.522061	1	0.282278
													-	ENSOCUG00000027112	7353.06	4658.04	10048.1	2.15715	1.10913	12.7401	0.0318548	1	1.49682	Uncharacterized protein [Source:UniProtKB/TrEMBL;Acc:G1U7L1]	#		ENSOCUG00000000468	123.731	105.04	142.422	1.35589	0.439235	6.93441	0.544908	1	0.263677
													FCGBP	ENSOCUG00000027210	46.8177	17.1883	76.4471	4.44761	2.15303	5.17987	0.0355234	1	1.44948	Fc fragment of IgG binding protein [Source:HGNC Symbol;Acc:HGNC:13572]	#		ENSOCUG00000000470	184.011	179.523	188.5	1.05001	0.0703963	7.52322	0.922852	1	0.0348679
													LAMC3	ENSOCUG00000027230	433.745	223.449	644.041	2.88228	1.52721	8.5674	0.00902322	0.766008	2.04464	laminin, gamma 3 [Source:HGNC Symbol;Acc:HGNC:6494]	#		ENSOCUG00000000471	12.0589	10.504	13.6139	1.29607	0.37414	3.57994	0.883684	1	0.053703
													-	ENSOCUG00000027459	1841.85	1087.64	2596.06	2.38687	1.25512	10.7145	0.0180054	1	1.7446	Uncharacterized protein [Source:UniProtKB/TrEMBL;Acc:G1TTE5]	#		ENSOCUG00000000472	194.977	190.982	198.972	1.04184	0.0591315	7.60686	0.935462	1	0.0289738
													PSORS1C2	ENSOCUG00000027593	50.2363	11.4589	89.0138	7.76809	2.95756	4.99718	0.00450391	0.479531	2.34641	psoriasis susceptibility 1 candidate 2 [Source:HGNC Symbol;Acc:HGNC:17199]	#		ENSOCUG00000000473	821.806	644.563	999.049	1.54996	0.632234	9.64829	0.245595	1	0.60978
													-	ENSOCUG00000027648	886.877	424.934	1348.82	3.17419	1.66639	9.56429	0.00262077	0.338015	2.58157	Uncharacterized protein [Source:UniProtKB/TrEMBL;Acc:G1SE76]	#		ENSOCUG00000000475	1306.47	1233.74	1379.19	1.11789	0.160781	10.3492	0.762533	1	0.117741
													-	ENSOCUG00000027948	482.422	148.011	816.832	5.51874	2.46434	8.44173	3.83335e-05	0.017886	4.41642	Uncharacterized protein [Source:UniProtKB/TrEMBL;Acc:G1TWD4]	#		ENSOCUG00000000476	2.91088	4.77454	1.04722	0.219334	-2.1888	1.16096	0.727421	1	0.138214
													ISG15	ENSOCUG00000027981	311.51	163.289	459.73	2.81543	1.49336	8.09796	0.0141739	0.973398	1.84851	ISG15 ubiquitin-like modifier [Source:HGNC Symbol;Acc:HGNC:4053]	#		ENSOCUG00000000477	565.462	509.921	621.002	1.21784	0.284324	9.13629	0.612327	1	0.213017
													-	ENSOCUG00000029237	438.739	0.954908	876.524	917.914	9.84222	4.85454	4.76414e-22	3.77891e-18	21.322	Uncharacterized protein [Source:UniProtKB/TrEMBL;Acc:U3KPQ7]	#		ENSOCUG00000000479	476.319	393.422	559.216	1.42141	0.507327	8.8736	0.372796	1	0.428528
													RARRES1	ENSOCUG00000029263	69.333	17.1883	121.478	7.06744	2.82119	5.51395	0.00213238	0.296738	2.67113	retinoic acid receptor responder (tazarotene induced) 1 [Source:HGNC Symbol;Acc:HGNC:9867]	#		ENSOCUG00000000481	894.953	886.155	903.752	1.01986	0.0283678	9.8056	0.960329	1	0.0175799
													OASL	ENSOCUG00000029328	81.2837	19.0982	143.469	7.5122	2.90924	5.70998	0.000899489	0.171483	3.046	2'-5'-oligoadenylate synthetase-like [Source:HGNC Symbol;Acc:HGNC:8090]	#		ENSOCUG00000000482	44.771	48.7003	40.8416	0.838631	-0.253891	5.47891	0.81906	1	0.0866845
													KRT2	ENSOCUG00000029348	85928	49920.7	121935	2.44258	1.28841	16.2516	0.0123719	0.912876	1.90756	keratin 2 [Source:HGNC Symbol;Acc:HGNC:6439]	#		ENSOCUG00000000483	10.1953	5.72945	14.6611	2.5589	1.35552	3.19616	0.536794	1	0.270192
													-	ENSOCUG00000029357	3844.22	1172.63	6515.81	5.55659	2.4742	11.4326	5.19444e-06	0.00329619	5.28446	Uncharacterized protein [Source:UniProtKB/TrEMBL;Acc:U3KPP1]	#		ENSOCUG00000000484	537	481.274	592.727	1.23158	0.30051	9.06097	0.593906	1	0.226283
													-	ENSOCUG00000029646	169.777	84.0319	255.522	3.04077	1.60444	7.19508	0.0181991	1	1.73995	Uncharacterized protein [Source:UniProtKB/TrEMBL;Acc:U3KNT2]	#		ENSOCUG00000000485	34.6362	20.0531	49.2194	2.45446	1.2954	4.97345	0.25194	1	0.598703
													SERPINA9	ENSOCUG00000029657	28.5678	4.77454	52.3611	10.9667	3.45506	3.98289	0.0116464	0.875635	1.93381	serpin peptidase inhibitor, clade A (alpha-1 antiproteinase, antitrypsin), member 9 [Source:HGNC Symbol;Acc:HGNC:15995]	#		ENSOCUG00000000486	14.7852	19.0982	10.4722	0.548336	-0.866868	3.82193	0.629994	1	0.200663
													KRT1	ENSOCUG00000029663	90065	49758.4	130372	2.6201	1.38962	16.2975	0.00711849	0.686687	2.14761	keratin 1 [Source:HGNC Symbol;Acc:HGNC:6412]	#		ENSOCUG00000000487	356.499	261.645	451.352	1.72506	0.786644	8.42479	0.182	1	0.739929
													PEBP4	ENSOCUG00000000195	10.9958	0	21.9916	Inf	Inf	#NUM!	0.0280488	1	1.55209	phosphatidylethanolamine-binding protein 4 [Source:HGNC Symbol;Acc:HGNC:28319]	#		ENSOCUG00000000489	35.2839	39.1512	31.4166	0.802443	-0.317529	5.13222	0.794876	1	0.0997004
													-	ENSOCUG00000000308	12.043	0	24.0861	Inf	Inf	#NUM!	0.0198146	1	1.70301	-	#		ENSOCUG00000000491	1.00106	0.954908	1.04722	1.09667	0.133132	-1.1212e-15	1	1	0
													SLC6A11	ENSOCUG00000001627	19.3736	0	38.7472	Inf	Inf	#NUM!	0.00193058	0.279528	2.71431	solute carrier family 6 (neurotransmitter transporter), member 11 [Source:HGNC Symbol;Acc:HGNC:11044]	#		ENSOCUG00000000493	526.997	634.059	419.936	0.662297	-0.594449	9.01125	0.291786	1	0.534936
													-	ENSOCUG00000006985	20.4208	0	40.8416	Inf	Inf	#NUM!	0.00140419	0.223742	2.85257	Uncharacterized protein [Source:UniProtKB/TrEMBL;Acc:G1SS53]	#		ENSOCUG00000000494	49.9609	49.6552	50.2666	1.01231	0.0176548	5.6427	1	1	0
													ZBTB16	ENSOCUG00000007470	19.8972	0	39.7944	Inf	Inf	#NUM!	0.00164577	0.247554	2.78363	zinc finger and BTB domain containing 16 [Source:HGNC Symbol;Acc:HGNC:12930]	#		ENSOCUG00000000498	177.652	191.937	163.366	0.851148	-0.232517	7.46823	0.73042	1	0.136427
													-	ENSOCUG00000013591	20.4208	0	40.8416	Inf	Inf	#NUM!	0.00140419	0.223742	2.85257	Uncharacterized protein [Source:UniProtKB/TrEMBL;Acc:G1T5Q3]	#		ENSOCUG00000000499	322.806	330.398	315.214	0.954041	-0.0678765	8.33412	0.914448	1	0.0388409
													-	ENSOCUG00000023494	10.4722	0	20.9444	Inf	Inf	#NUM!	0.0334192	1	1.476	Transporter [Source:UniProtKB/TrEMBL;Acc:G1U649]	#		ENSOCUG00000000500	61.5424	59.2043	63.8805	1.07898	0.109673	5.94247	0.920401	1	0.0360229
													-	ENSOCUG00000024676	15.1847	0	30.3694	Inf	Inf	#NUM!	0.00714543	0.686687	2.14597	Uncharacterized protein [Source:UniProtKB/TrEMBL;Acc:G1U473]	#		ENSOCUG00000000501	21.3916	12.4138	30.3694	2.44642	1.29067	4.27921	0.364886	1	0.437843
													-	ENSOCUG00000025273	16.7555	0	33.5111	Inf	Inf	#NUM!	0.00434489	0.468893	2.36202	Uncharacterized protein [Source:UniProtKB/TrEMBL;Acc:G1T7P3]	#		ENSOCUG00000000502	130.692	112.679	148.705	1.31972	0.400236	7.0162	0.576423	1	0.239258
													-	ENSOCUG00000026048	14.1375	0	28.275	Inf	Inf	#NUM!	0.0100013	0.804178	1.99994	Uncharacterized protein [Source:UniProtKB/TrEMBL;Acc:G1SF73]	#		ENSOCUG00000000503	491.817	506.101	477.533	0.943552	-0.0838265	8.94137	0.885713	1	0.0527068
													-	ENSOCUG00000027166	25.6569	0	51.3138	Inf	Inf	#NUM!	0.000300484	0.0794481	3.52218	-	#		ENSOCUG00000000507	90.1117	96.4457	83.7777	0.868651	-0.203151	6.49007	0.807395	1	0.092914
													-	ENSOCUG00000027358	46.6013	0	93.2027	Inf	Inf	#NUM!	1.29395e-06	0.00102636	5.88808	-	#		ENSOCUG00000000508	5.09764	2.86472	7.33055	2.5589	1.35552	2.19616	0.717566	1	0.144138
													PIWIL1	ENSOCUG00000027444	16.7555	0	33.5111	Inf	Inf	#NUM!	0.00434489	0.468893	2.36202	piwi-like RNA-mediated gene silencing 1 [Source:HGNC Symbol;Acc:HGNC:9007]	#		ENSOCUG00000000509	43.3689	34.3767	52.3611	1.52316	0.607063	5.40689	0.559505	1	0.252196
																											ENSOCUG00000000510	771.072	870.876	671.269	0.770797	-0.375577	9.57854	0.491984	1	0.308049
																											ENSOCUG00000000511	897.711	915.757	879.666	0.960589	-0.0580095	9.80982	0.916531	1	0.037853
																											ENSOCUG00000000512	1024.28	1135.39	913.177	0.804288	-0.314217	9.99186	0.558617	1	0.252886
																											ENSOCUG00000000515	32.5418	20.0531	45.0305	2.24557	1.16708	4.90929	0.315236	1	0.501365
																											ENSOCUG00000000516	612.238	625.465	599.01	0.957704	-0.0623477	9.25761	0.913492	1	0.0392951
																											ENSOCUG00000000518	75.0034	84.0319	65.9749	0.785117	-0.34902	6.21836	0.684597	1	0.164565
																											ENSOCUG00000000520	75.2039	90.7163	59.6916	0.658003	-0.603834	6.20137	0.472628	1	0.325481
																											ENSOCUG00000000521	427.929	343.767	512.091	1.48965	0.57497	8.71277	0.318062	1	0.497488
																											ENSOCUG00000000524	539.562	601.592	477.533	0.793782	-0.333186	9.06605	0.554085	1	0.256424
																											ENSOCUG00000000525	610.53	660.796	560.263	0.847861	-0.238101	9.24901	0.669649	1	0.174153
																											ENSOCUG00000000526	215.614	208.17	223.058	1.07152	0.0996573	7.75145	0.8822	1	0.0544328
																											ENSOCUG00000000527	5.29815	9.54908	1.04722	0.109667	-3.1888	1.66096	0.394998	1	0.403406
																											ENSOCUG00000000528	2.43343	3.81963	1.04722	0.274168	-1.86687	1	0.816043	1	0.088287
																											ENSOCUG00000000530	406.491	332.308	480.674	1.44647	0.532539	8.64265	0.357912	1	0.446224
																											ENSOCUG00000000531	416.688	370.504	462.872	1.2493	0.321122	8.69391	0.579128	1	0.237225
																											ENSOCUG00000000532	3858.67	4275.12	3442.22	0.805173	-0.312629	11.9054	0.544013	1	0.264391
																											ENSOCUG00000000533	14.2918	7.63927	20.9444	2.74168	1.45506	3.66096	0.412677	1	0.38439
																											ENSOCUG00000000534	68.6739	84.9868	52.3611	0.616108	-0.698745	6.05979	0.4194	1	0.377372
																											ENSOCUG00000000535	47.0341	34.3767	59.6916	1.7364	0.796097	5.50141	0.423997	1	0.372638
																											ENSOCUG00000000536	305.124	284.563	325.686	1.14451	0.194734	8.24997	0.749286	1	0.125352
																											ENSOCUG00000000539	23.8712	15.2785	32.4639	2.1248	1.08733	4.4771	0.420552	1	0.37618
																											ENSOCUG00000000540	1.95597	2.86472	1.04722	0.365557	-1.45183	0.792481	0.912276	1	0.0398736
																											ENSOCUG00000000543	141.411	118.409	164.414	1.38853	0.473556	7.12441	0.49852	1	0.302318
																											ENSOCUG00000000545	26.8441	29.6022	24.0861	0.81366	-0.297502	4.73888	0.838146	1	0.0766802
																											ENSOCUG00000000547	9.25625	14.3236	4.18888	0.292446	-1.77376	2.95345	0.449691	1	0.347086
																											ENSOCUG00000000548	290.278	288.382	292.175	1.01315	0.0188486	8.18126	0.981496	1	0.00811137
																											ENSOCUG00000000551	308.25	274.059	342.441	1.24952	0.321372	8.25903	0.594029	1	0.226192
																											ENSOCUG00000000552	1447.67	1497.3	1398.04	0.93371	-0.0989538	10.4987	0.852381	1	0.0693661
																											ENSOCUG00000000553	70.1525	86.8966	53.4083	0.614618	-0.702237	6.09011	0.413532	1	0.383491
																											ENSOCUG00000000554	49.8845	62.069	37.7	0.607388	-0.719311	5.59615	0.461443	1	0.335882
																											ENSOCUG00000000555	32.5736	41.0611	24.0861	0.586592	-0.769571	4.97491	0.512866	1	0.289997
																											ENSOCUG00000000557	218.847	173.793	263.9	1.51847	0.602617	7.74254	0.342832	1	0.464919
																											ENSOCUG00000000558	190.39	242.547	138.233	0.569924	-0.811159	7.51654	0.214429	1	0.668716
																											ENSOCUG00000000559	214.723	248.276	181.169	0.729709	-0.454608	7.7285	0.476913	1	0.321561
																											ENSOCUG00000000560	220.36	261.645	179.075	0.684419	-0.547048	7.75794	0.389082	1	0.409959
																											ENSOCUG00000000561	22.6393	19.0982	26.1805	1.37084	0.45506	4.48289	0.760761	1	0.118752
																											ENSOCUG00000000562	1009.31	1152.57	866.052	0.751407	-0.412334	9.96448	0.442976	1	0.353619
																											ENSOCUG00000000564	446.199	464.085	428.313	0.922919	-0.115723	8.80038	0.843078	1	0.0741323
																											ENSOCUG00000000565	594.504	450.717	738.291	1.63804	0.711968	9.17206	0.202084	1	0.694467
																											ENSOCUG00000000566	51.1625	57.2945	45.0305	0.785948	-0.347494	5.66658	0.729473	1	0.136991
																											ENSOCUG00000000569	4.00426	3.81963	4.18888	1.09667	0.133132	2	1	1	0
																											ENSOCUG00000000570	157.831	179.523	136.139	0.758337	-0.399089	7.28848	0.559516	1	0.252187
																											ENSOCUG00000000572	250.915	290.292	211.539	0.72871	-0.456584	7.95307	0.46243	1	0.334954
																											ENSOCUG00000000573	180.222	160.425	200.019	1.24681	0.318243	7.48487	0.632814	1	0.198724
																											ENSOCUG00000000574	69.7976	72.573	67.0221	0.923513	-0.114795	6.12396	0.909672	1	0.0411152
																											ENSOCUG00000000575	24.3343	38.1963	10.4722	0.274168	-1.86687	4.32193	0.168707	1	0.772866
																											ENSOCUG00000000576	59.6326	55.3847	63.8805	1.1534	0.205888	5.89436	0.835047	1	0.078289
																											ENSOCUG00000000577	212.598	259.735	165.461	0.637037	-0.65055	7.69562	0.308735	1	0.510414
																											ENSOCUG00000000578	117.417	116.499	118.336	1.01577	0.0225737	6.87546	0.988506	1	0.00502067
																											ENSOCUG00000000579	1.52468	0.954908	2.09444	2.19334	1.13313	0.5	0.983403	1	0.00726868
																											ENSOCUG00000000581	1333.72	1189.82	1477.63	1.2419	0.312546	10.3728	0.55558	1	0.255253
																											ENSOCUG00000000582	422.987	381.008	464.966	1.22036	0.287303	8.71733	0.619463	1	0.207985
																											ENSOCUG00000000583	184.919	149.921	219.916	1.46689	0.552757	7.50443	0.400107	1	0.397824
																											ENSOCUG00000000584	74.3716	75.4377	73.3055	0.971735	-0.0413657	6.21653	0.978521	1	0.00942974
																											ENSOCUG00000000586	459.981	417.295	502.666	1.20458	0.268533	8.83919	0.639528	1	0.19414
																											ENSOCUG00000000587	241.812	251.141	232.483	0.925708	-0.111371	7.91667	0.864086	1	0.0634431
																											ENSOCUG00000000588	226.196	249.231	203.161	0.815151	-0.294861	7.81391	0.643397	1	0.191521
																											ENSOCUG00000000589	245.754	245.411	246.097	1.00279	0.00402443	7.94107	1	1	0
																											ENSOCUG00000000590	228.782	228.223	229.341	1.0049	0.00705228	7.83783	0.999042	1	0.000416461
																											ENSOCUG00000000591	2.52574	1.90982	3.14166	1.64501	0.718095	1.29248	0.975926	1	0.010583
																											ENSOCUG00000000592	387.746	275.968	499.524	1.81008	0.856052	8.53639	0.142552	1	0.846027
																											ENSOCUG00000000593	280.223	312.255	248.191	0.794836	-0.331272	8.12095	0.58834	1	0.230372
																											ENSOCUG00000000594	194.807	172.838	216.775	1.2542	0.326773	7.59667	0.617641	1	0.209264
																											ENSOCUG00000000595	277.542	270.239	284.844	1.05405	0.0759366	8.11606	0.906518	1	0.0426237
																											ENSOCUG00000000596	971.941	929.126	1014.76	1.09216	0.127189	9.92332	0.81447	1	0.0891251
																											ENSOCUG00000000597	13.8144	6.68436	20.9444	3.13335	1.64771	3.56464	0.363344	1	0.439682
																											ENSOCUG00000000598	241.073	266.419	215.728	0.809729	-0.304489	7.90531	0.628308	1	0.201828
																											ENSOCUG00000000601	936.232	1017.93	854.532	0.839479	-0.252434	9.86521	0.640438	1	0.193523
																											ENSOCUG00000000602	54.0893	72.573	35.6055	0.490616	-1.02733	5.6677	0.275453	1	0.559952
																											ENSOCUG00000000603	36.1306	32.4669	39.7944	1.22569	0.293597	5.1677	0.809299	1	0.0918912
																											ENSOCUG00000000604	4095.33	3322.13	4868.53	1.46549	0.55138	11.9736	0.284838	1	0.545403
																											ENSOCUG00000000606	15.0621	13.3687	16.7555	1.25334	0.325777	3.90368	0.882346	1	0.0543611
																											ENSOCUG00000000607	2493.29	2581.12	2405.47	0.931948	-0.101679	11.2829	0.845334	1	0.0729718
																											ENSOCUG00000000608	5529.81	7302.18	3757.43	0.514562	-0.958582	12.3548	0.0635363	1	1.19698
																											ENSOCUG00000000609	14.3539	17.1883	11.5194	0.670188	-0.577361	3.81468	0.766797	1	0.115319
																											ENSOCUG00000000611	8385.71	9249.24	7522.19	0.813276	-0.298182	13.026	0.559429	1	0.252255
																											ENSOCUG00000000612	33.5126	32.4669	34.5583	1.06442	0.0900633	5.06593	0.965342	1	0.0153187
																											ENSOCUG00000000613	212.504	229.178	195.83	0.85449	-0.226864	7.72689	0.726703	1	0.138643
																											ENSOCUG00000000614	88.248	91.6712	84.8249	0.925317	-0.11198	6.46241	0.901441	1	0.0450627
																											ENSOCUG00000000615	124.901	91.6712	158.13	1.72497	0.786574	6.91168	0.273872	1	0.562452
																											ENSOCUG00000000617	39.242	43.9258	34.5583	0.786743	-0.346036	5.28398	0.761785	1	0.118168
																											ENSOCUG00000000618	138.301	139.417	137.186	0.984	-0.0232695	7.11162	0.985146	1	0.00649942
																											ENSOCUG00000000619	24.3025	17.1883	31.4166	1.82779	0.870098	4.53841	0.518781	1	0.285016
																											ENSOCUG00000000621	159.879	180.478	139.28	0.771732	-0.373828	7.30876	0.583986	1	0.233597
																											ENSOCUG00000000624	247.634	260.69	234.578	0.899833	-0.15227	7.95006	0.811322	1	0.0908069
																											ENSOCUG00000000625	111.626	95.4908	127.761	1.33794	0.420013	6.7873	0.574262	1	0.24089
																											ENSOCUG00000000626	221.221	232.998	209.444	0.898911	-0.153749	7.7873	0.813788	1	0.0894885
																											ENSOCUG00000000628	245.6	237.772	253.427	1.06584	0.0919933	7.93943	0.888424	1	0.0513799
																											ENSOCUG00000000630	285.364	249.231	321.497	1.28996	0.367321	8.145	0.546556	1	0.262365
																											ENSOCUG00000000631	69.4283	80.2123	58.6444	0.731115	-0.45183	6.09984	0.604823	1	0.218372
																											ENSOCUG00000000633	1164.38	1205.09	1123.67	0.932432	-0.10093	10.1845	0.851108	1	0.0700151
																											ENSOCUG00000000634	67.9498	78.3025	57.5972	0.735573	-0.44306	6.06946	0.614997	1	0.211127
																											ENSOCUG00000000635	1.52468	0.954908	2.09444	2.19334	1.13313	0.5	0.983403	1	0.00726868
																											ENSOCUG00000000636	1.00106	0.954908	1.04722	1.09667	0.133132	-1.1212e-15	1	1	0
																											ENSOCUG00000000637	1281.83	1440	1123.67	0.780324	-0.357854	10.3129	0.500514	1	0.300584
																											ENSOCUG00000000638	256.982	273.104	240.861	0.881939	-0.181249	8.00268	0.773379	1	0.111608
																											ENSOCUG00000000641	78.0528	85.9417	70.1638	0.816411	-0.292632	6.27897	0.732328	1	0.135294
																											ENSOCUG00000000645	38.1948	43.9258	32.4639	0.739062	-0.436234	5.23888	0.699514	1	0.155204
																											ENSOCUG00000000649	130.339	130.822	129.855	0.992608	-0.0107037	7.02611	1	1	0
																											ENSOCUG00000000650	272.323	313.21	231.436	0.738916	-0.436517	8.07273	0.476491	1	0.321946
																											ENSOCUG00000000651	1258.42	1003.61	1513.23	1.50779	0.592439	10.2672	0.265517	1	0.575908
																											ENSOCUG00000000652	27.0287	25.7825	28.275	1.09667	0.133132	4.75489	0.946303	1	0.0239696
																											ENSOCUG00000000653	671.686	684.669	658.702	0.962073	-0.0557811	9.39137	0.922086	1	0.0352284
																											ENSOCUG00000000655	54.0416	41.0611	67.0221	1.63226	0.706867	5.71313	0.454173	1	0.342779
																											ENSOCUG00000000656	55.9355	34.3767	77.4944	2.25427	1.17266	5.68969	0.206714	1	0.68463
																											ENSOCUG00000000657	13.1523	9.54908	16.7555	1.75468	0.811204	3.66096	0.676672	1	0.169622
																											ENSOCUG00000000658	4.62018	1.90982	7.33055	3.83835	1.94049	1.90368	0.62139	1	0.206635
																											ENSOCUG00000000659	35.2378	40.1061	30.3694	0.757226	-0.401204	5.12515	0.735317	1	0.133525
																											ENSOCUG00000000663	32.8044	36.2865	29.3222	0.808074	-0.307441	5.02764	0.810055	1	0.0914852
																											ENSOCUG00000000666	13.1523	9.54908	16.7555	1.75468	0.811204	3.66096	0.676672	1	0.169622
																											ENSOCUG00000000668	199.135	202.441	195.83	0.967347	-0.047894	7.63741	0.949133	1	0.0226728
																											ENSOCUG00000000669	8.96343	9.54908	8.37777	0.877338	-0.188796	3.16096	0.989553	1	0.00456082
																											ENSOCUG00000000670	15.355	18.1433	12.5667	0.692635	-0.529833	3.91645	0.778972	1	0.108478
																											ENSOCUG00000000671	10.5804	8.59417	12.5667	1.46223	0.54817	3.37744	0.825711	1	0.0831719
																											ENSOCUG00000000672	25.4579	25.7825	25.1333	0.97482	-0.036793	4.66993	1	1	0
																											ENSOCUG00000000673	58.6936	63.9789	53.4083	0.83478	-0.260532	5.86926	0.78838	1	0.103264
																											ENSOCUG00000000674	43.7699	47.7454	39.7944	0.833471	-0.262797	5.44589	0.814091	1	0.0893269
																											ENSOCUG00000000676	376.758	438.303	315.214	0.719168	-0.475599	8.53799	0.416217	1	0.380681
																											ENSOCUG00000000677	4307.82	5024.73	3590.92	0.71465	-0.484691	12.0525	0.346543	1	0.460243
																											ENSOCUG00000000678	875.904	911.937	839.871	0.920975	-0.118766	9.77341	0.827954	1	0.0819939
																											ENSOCUG00000000679	684.881	628.33	741.433	1.18001	0.238794	9.41477	0.665604	1	0.176784
																											ENSOCUG00000000680	298.056	300.796	295.316	0.981783	-0.0265246	8.21938	0.971035	1	0.0127652
																											ENSOCUG00000000681	29.8473	32.4669	27.2277	0.838631	-0.253891	4.89395	0.85689	1	0.0670747
																											ENSOCUG00000000682	345.998	305.571	386.425	1.2646	0.338681	8.4247	0.567668	1	0.245905
																											ENSOCUG00000000683	480.594	575.81	385.377	0.669279	-0.57932	8.87979	0.308597	1	0.510608
																											ENSOCUG00000000684	813.994	892.839	735.149	0.823384	-0.280363	9.66207	0.606997	1	0.216813
																											ENSOCUG00000000686	1.52468	0.954908	2.09444	2.19334	1.13313	0.5	0.983403	1	0.00726868
																											ENSOCUG00000000687	162.634	145.146	180.122	1.24097	0.311469	7.3371	0.648092	1	0.188363
																											ENSOCUG00000000688	366.28	308.435	424.125	1.37508	0.45952	8.49858	0.43366	1	0.362851
																											ENSOCUG00000000689	153.917	141.326	166.508	1.17818	0.236562	7.26117	0.734723	1	0.133876
																											ENSOCUG00000000692	616.041	622.6	609.483	0.978931	-0.0307208	9.2668	0.959009	1	0.0181775
																											ENSOCUG00000000694	268.129	215.809	320.45	1.48487	0.570341	8.03878	0.352537	1	0.452795
																											ENSOCUG00000000695	391.447	361.91	420.983	1.16322	0.21813	8.60855	0.709835	1	0.148842
																											ENSOCUG00000000696	440.352	563.396	317.308	0.563206	-0.828265	8.72387	0.150091	1	0.823646
																											ENSOCUG00000000697	97.95	85.9417	109.958	1.27945	0.355524	6.60305	0.649486	1	0.18743
																											ENSOCUG00000000699	15.1242	22.9178	7.33055	0.319863	-1.64448	3.69616	0.342442	1	0.465413
																											ENSOCUG00000000703	72.4156	72.573	72.2583	0.995663	-0.00627102	6.17823	1	1	0
																											ENSOCUG00000000706	549.065	621.645	476.486	0.766491	-0.383659	9.08812	0.494698	1	0.30566
																											ENSOCUG00000000707	105.357	73.5279	137.186	1.86577	0.899768	6.6501	0.232099	1	0.634326
																											ENSOCUG00000000708	137.1	131.777	142.422	1.08078	0.11207	7.09799	0.882604	1	0.0542341
																											ENSOCUG00000000709	141.998	160.425	123.572	0.770281	-0.376542	7.13748	0.592112	1	0.227596
																											ENSOCUG00000000713	22.9783	22.9178	23.0389	1.00528	0.00760115	4.5222	1	1	0
																											ENSOCUG00000000714	3.48065	3.81963	3.14166	0.822504	-0.281905	1.79248	1	1	0
																											ENSOCUG00000000715	2014.62	1987.16	2042.08	1.02764	0.0393292	10.9762	0.940887	1	0.0264627
																											ENSOCUG00000000716	90.1738	105.995	74.3527	0.701475	-0.511537	6.47208	0.51977	1	0.284189
																											ENSOCUG00000000717	197.627	211.99	183.264	0.864494	-0.210073	7.62281	0.750601	1	0.124591
																											ENSOCUG00000000719	420.524	388.648	452.399	1.16404	0.219135	8.71189	0.705997	1	0.151197
																											ENSOCUG00000000720	353.086	397.242	308.93	0.777688	-0.362737	8.45251	0.539275	1	0.26819
																											ENSOCUG00000000721	2276.1	2871.41	1680.79	0.585354	-0.77262	11.1012	0.139443	1	0.855603
																											ENSOCUG00000000722	306.044	200.531	411.558	2.05234	1.03727	8.16632	0.0858364	1	1.06633
																											ENSOCUG00000000723	5.14379	1.90982	8.37777	4.38669	2.13313	2	0.55192	1	0.258123
																											ENSOCUG00000000724	88.6952	104.085	73.3055	0.704285	-0.505769	6.44873	0.526808	1	0.278348
																											ENSOCUG00000000725	5.09764	2.86472	7.33055	2.5589	1.35552	2.19616	0.717566	1	0.144138
																											ENSOCUG00000000726	1.52468	0.954908	2.09444	2.19334	1.13313	0.5	0.983403	1	0.00726868
																											ENSOCUG00000000727	12.3979	14.3236	10.4722	0.731115	-0.45183	3.61441	0.846118	1	0.0725691
																											ENSOCUG00000000728	59.8331	62.069	57.5972	0.927953	-0.107876	5.90186	0.923577	1	0.034527
																											ENSOCUG00000000729	531.198	547.162	515.233	0.941645	-0.0867448	9.05245	0.880477	1	0.055282
																											ENSOCUG00000000730	84.2884	54.4298	114.147	2.09714	1.06843	6.30054	0.184869	1	0.733135
																											ENSOCUG00000000731	454.084	452.626	455.541	1.00644	0.00926037	8.82681	0.991433	1	0.00373648
																											ENSOCUG00000000732	4.86685	7.63927	2.09444	0.274168	-1.86687	2	0.624912	1	0.204181
																											ENSOCUG00000000733	54.9201	55.3847	54.4555	0.983223	-0.0244092	5.77921	1	1	0
																											ENSOCUG00000000734	3250.67	3367.01	3134.33	0.930896	-0.103308	11.6656	0.841869	1	0.0747554
																											ENSOCUG00000000736	10.8112	3.81963	17.8028	4.66086	2.22059	3.04373	0.296918	1	0.527363
																											ENSOCUG00000000737	8.25519	13.3687	3.14166	0.235001	-2.08926	2.69616	0.412498	1	0.384578
																											ENSOCUG00000000738	225.47	210.08	240.861	1.14652	0.197262	7.81342	0.759247	1	0.119617
																											ENSOCUG00000000740	3265.94	2986	3545.89	1.18751	0.247935	11.668	0.631308	1	0.199759
																											ENSOCUG00000000741	255.671	224.403	286.939	1.27867	0.354647	7.98727	0.567718	1	0.245867
																											ENSOCUG00000000743	18.5889	16.2334	20.9444	1.2902	0.367597	4.2047	0.836529	1	0.077519
																											ENSOCUG00000000744	3473.61	2914.38	4032.85	1.38378	0.46861	11.7433	0.364249	1	0.438601
																											ENSOCUG00000000747	172.075	155.65	188.5	1.21105	0.276257	7.42029	0.682642	1	0.165807
																											ENSOCUG00000000749	282.114	240.637	323.591	1.34473	0.427315	8.12437	0.483216	1	0.315859
																											ENSOCUG00000000750	68.5657	76.3927	60.7388	0.795087	-0.330815	6.08995	0.710709	1	0.148308
																											ENSOCUG00000000754	42.9535	42.9709	42.9361	0.99919	-0.00116906	5.4247	1	1	0
																											ENSOCUG00000000755	361.335	280.743	441.927	1.57413	0.654559	8.46039	0.265463	1	0.575995
																											ENSOCUG00000000756	72.5397	91.6712	53.4083	0.582607	-0.779405	6.12869	0.357891	1	0.446249
																											ENSOCUG00000000758	11.7358	17.1883	6.28333	0.365557	-1.45183	3.37744	0.471086	1	0.326899
																											ENSOCUG00000000763	151.686	176.658	126.714	0.717283	-0.479386	7.22512	0.486102	1	0.313273
																											ENSOCUG00000000764	1228.09	872.786	1583.4	1.81419	0.859324	10.1991	0.10783	1	0.96726
																											ENSOCUG00000000765	259.121	239.682	278.561	1.16221	0.216871	8.01341	0.728594	1	0.137514
																											ENSOCUG00000000769	778.677	800.213	757.141	0.946174	-0.0798226	9.60433	0.885779	1	0.0526744
																											ENSOCUG00000000771	4.3894	6.68436	2.09444	0.313335	-1.67422	1.90368	0.692166	1	0.15979
																											ENSOCUG00000000775	14.739	20.0531	9.42499	0.470002	-1.08926	3.78112	0.538556	1	0.268769
																											ENSOCUG00000000776	114.677	129.868	99.486	0.766058	-0.384475	6.82866	0.60553	1	0.217865
																											ENSOCUG00000000777	368.64	389.603	347.677	0.89239	-0.164254	8.52373	0.782378	1	0.106584
																											ENSOCUG00000000778	253.011	322.759	183.264	0.567804	-0.816536	7.92605	0.188065	1	0.725693
																											ENSOCUG00000000779	172.261	184.297	160.225	0.869382	-0.201937	7.42492	0.767663	1	0.11483
																											ENSOCUG00000000780	305.372	322.759	287.986	0.892263	-0.16446	8.25208	0.78823	1	0.103347
																											ENSOCUG00000000781	288.367	252.096	324.639	1.28776	0.364862	8.16026	0.548613	1	0.260734
																											ENSOCUG00000000784	221.281	210.08	232.483	1.10664	0.146188	7.78789	0.823073	1	0.0845615
																											ENSOCUG00000000787	7.82389	11.4589	4.18888	0.365557	-1.45183	2.79248	0.584009	1	0.233581
																											ENSOCUG00000000789	216.785	227.268	206.303	0.907749	-0.139634	7.75843	0.832103	1	0.079823
																											ENSOCUG00000000790	441.856	456.446	427.266	0.936071	-0.0953094	8.78665	0.871451	1	0.0597572
																											ENSOCUG00000000791	7464.06	6348.23	8579.88	1.35154	0.434603	12.8494	0.395682	1	0.402654
																											ENSOCUG00000000792	238.396	321.804	154.989	0.481624	-1.05402	7.80303	0.093646	1	1.02851
																											ENSOCUG00000000794	456.134	486.048	426.219	0.876907	-0.189505	8.8302	0.742464	1	0.129325
																											ENSOCUG00000000795	96.2868	87.8516	104.722	1.19203	0.253426	6.58371	0.75144	1	0.124106
																											ENSOCUG00000000798	169.968	210.08	129.855	0.618124	-0.694031	7.36778	0.299378	1	0.52378
																											ENSOCUG00000000800	571.498	504.192	638.805	1.26699	0.341403	9.14853	0.542016	1	0.265988
																											ENSOCUG00000000802	1.95597	2.86472	1.04722	0.365557	-1.45183	0.792481	0.912276	1	0.0398736
																											ENSOCUG00000000803	175.971	150.875	201.066	1.33266	0.414314	7.44437	0.533977	1	0.272478
																											ENSOCUG00000000804	112.597	107.905	117.289	1.08697	0.120308	6.81377	0.881564	1	0.0547463
																											ENSOCUG00000000805	352.596	450.717	254.475	0.5646	-0.824699	8.40373	0.162784	1	0.788387
																											ENSOCUG00000000806	53.919	54.4298	53.4083	0.981233	-0.0273326	5.75266	0.999623	1	0.000163598
																											ENSOCUG00000000807	156.152	170.929	141.375	0.827099	-0.273868	7.28032	0.692444	1	0.159615
																											ENSOCUG00000000809	65.9938	75.4377	56.5499	0.749624	-0.415761	6.02933	0.641675	1	0.192685
																											ENSOCUG00000000810	817.746	1107.69	527.799	0.476485	-1.0695	9.57859	0.0511382	1	1.29125
																											ENSOCUG00000000811	575.413	574.855	575.972	1.00194	0.00280016	9.16845	0.999571	1	0.00018628
																											ENSOCUG00000000813	2.47958	2.86472	2.09444	0.731115	-0.45183	1.29248	1	1	0
																											ENSOCUG00000000815	1.47852	1.90982	1.04722	0.548336	-0.866868	0.5	1	1	0
																											ENSOCUG00000000816	839.674	719.046	960.302	1.33552	0.417404	9.69864	0.442289	1	0.354294
																											ENSOCUG00000000817	679.237	799.258	559.216	0.699669	-0.515256	9.38489	0.350253	1	0.455618
																											ENSOCUG00000000818	893.737	900.478	886.996	0.985028	-0.0217638	9.80367	0.970156	1	0.0131584
																											ENSOCUG00000000819	24.6876	20.0531	29.3222	1.46223	0.54817	4.59984	0.692541	1	0.159554
																											ENSOCUG00000000820	203.324	202.441	204.208	1.00873	0.0125419	7.66763	0.993146	1	0.00298674
																											ENSOCUG00000000821	857.645	704.722	1010.57	1.434	0.52004	9.72093	0.33788	1	0.471237
																											ENSOCUG00000000822	327.791	227.268	428.313	1.88462	0.914271	8.28539	0.125607	1	0.900985
																											ENSOCUG00000000823	189.633	182.387	196.878	1.07945	0.110292	7.56601	0.872982	1	0.0589947
																											ENSOCUG00000000824	1297.98	1474.38	1121.57	0.76071	-0.394582	10.3286	0.457338	1	0.339763
																											ENSOCUG00000000825	2.52574	1.90982	3.14166	1.64501	0.718095	1.29248	0.975926	1	0.010583
																											ENSOCUG00000000826	82.9037	83.077	82.7305	0.995829	-0.00603072	6.37336	1	1	0
																											ENSOCUG00000000827	426.423	418.25	434.597	1.03908	0.0553125	8.73588	0.92749	1	0.0326908
																											ENSOCUG00000000828	2226.88	2113.21	2340.54	1.10757	0.147403	11.1189	0.777592	1	0.109248
																											ENSOCUG00000000829	73.9085	52.52	95.2971	1.81449	0.859567	6.14458	0.306331	1	0.513809
																											ENSOCUG00000000830	133.113	170.929	95.2971	0.557526	-0.842889	6.99581	0.23405	1	0.630691
																											ENSOCUG00000000831	87.6177	115.544	59.6916	0.516614	-0.952841	6.37588	0.231761	1	0.63496
																											ENSOCUG00000000832	79.9626	89.7614	70.1638	0.78167	-0.355368	6.31034	0.671774	1	0.172777
																											ENSOCUG00000000833	174.632	178.568	170.697	0.955923	-0.0650343	7.44781	0.930758	1	0.0311631
																											ENSOCUG00000000835	121.807	123.183	120.43	0.977653	-0.0326052	6.92836	0.976664	1	0.0102547
																											ENSOCUG00000000837	597.592	635.969	559.216	0.879314	-0.18555	9.22004	0.740689	1	0.130364
																											ENSOCUG00000000847	342.123	450.717	233.53	0.518131	-0.948611	8.34177	0.110407	1	0.957003
																											ENSOCUG00000000848	1885.72	1989.07	1782.37	0.89608	-0.1583	10.8787	0.7628	1	0.117589
																											ENSOCUG00000000849	140.227	153.74	126.714	0.824207	-0.278922	7.12489	0.695029	1	0.157997
																											ENSOCUG00000000850	3.57296	1.90982	5.23611	2.74168	1.45506	1.66096	0.782367	1	0.106589
																											ENSOCUG00000000851	16028	11097	20959.1	1.88872	0.917407	13.8966	0.0735445	1	1.13345
																											ENSOCUG00000000852	22.6855	18.1433	27.2277	1.50071	0.585644	4.47418	0.685057	1	0.164273
																											ENSOCUG00000000853	229.503	169.974	289.033	1.70046	0.765923	7.79213	0.224068	1	0.64962
																											ENSOCUG00000000855	410.113	398.197	422.03	1.05985	0.0838645	8.67927	0.8885	1	0.0513424
																											ENSOCUG00000000856	99.2756	112.679	85.8721	0.762094	-0.391959	6.6201	0.613938	1	0.211875
																											ENSOCUG00000000857	131.727	167.109	96.3443	0.576536	-0.794517	6.98739	0.263152	1	0.579793
																											ENSOCUG00000000859	287.675	266.419	308.93	1.15956	0.213582	8.16435	0.72793	1	0.13791
																											ENSOCUG00000000863	49.1906	43.9258	54.4555	1.23972	0.31001	5.612	0.763894	1	0.116967
																											ENSOCUG00000000864	262.11	264.51	259.711	0.981858	-0.0264138	8.03397	0.972595	1	0.0120678
																											ENSOCUG00000000865	928.163	1033.21	823.116	0.796658	-0.327967	9.84894	0.543775	1	0.264581
																											ENSOCUG00000000866	139.611	155.65	123.572	0.79391	-0.332953	7.11569	0.638249	1	0.19501
																											ENSOCUG00000000867	106.775	98.3555	115.194	1.1712	0.227991	6.73393	0.76949	1	0.113797
																											ENSOCUG00000000874	854.187	841.274	867.099	1.0307	0.0436208	9.73824	0.938039	1	0.0277792
																											ENSOCUG00000000875	36.0845	33.4218	38.7472	1.15934	0.213302	5.16937	0.868999	1	0.0609806
																											ENSOCUG00000000876	50.5768	47.7454	53.4083	1.11861	0.161701	5.65814	0.885404	1	0.0528583
																											ENSOCUG00000000877	28.138	35.3316	20.9444	0.592796	-0.754393	4.76569	0.550852	1	0.258965
																											ENSOCUG00000000878	595.86	465.995	725.724	1.55736	0.639106	9.18372	0.251779	1	0.598981
																											ENSOCUG00000000880	9570.08	10766.6	8373.58	0.777737	-0.362645	13.213	0.477526	1	0.321003
																											ENSOCUG00000000881	16.9878	27.6923	6.28333	0.226898	-2.13989	3.72147	0.194416	1	0.711267
																											ENSOCUG00000000882	700.683	658.887	742.48	1.12687	0.172321	9.45005	0.755424	1	0.121809
																											ENSOCUG00000000884	91.4359	90.7163	92.1555	1.01586	0.022708	6.51464	0.992762	1	0.0031549
																											ENSOCUG00000000885	377.401	360	394.802	1.09667	0.133132	8.55842	0.82315	1	0.0845208
																											ENSOCUG00000000887	463.316	608.277	318.355	0.523372	-0.93409	8.78154	0.103243	1	0.986139
																											ENSOCUG00000000889	14.1072	11.4589	16.7555	1.46223	0.54817	3.79248	0.782121	1	0.106726
																											ENSOCUG00000000895	102.355	103.13	101.58	0.984974	-0.0218426	6.6774	0.991731	1	0.00360628
																											ENSOCUG00000000896	54.0575	51.565	56.5499	1.09667	0.133132	5.75489	0.906093	1	0.0428272
																											ENSOCUG00000000897	34.4834	44.8807	24.0861	0.536669	-0.897895	5.03908	0.430636	1	0.36589
																											ENSOCUG00000000898	286.535	268.329	304.741	1.1357	0.183581	8.15965	0.765948	1	0.1158
																											ENSOCUG00000000906	26.459	26.7374	26.1805	0.979171	-0.0303667	4.72561	1	1	0
																											ENSOCUG00000000907	304.586	306.526	302.647	0.987346	-0.0183718	8.25068	0.981744	1	0.00800164
																											ENSOCUG00000000909	55.9212	56.3396	55.5027	0.985146	-0.0215906	5.80528	1	1	0
																											ENSOCUG00000000910	155.367	187.162	123.572	0.660241	-0.598935	7.24868	0.380373	1	0.41979
																											ENSOCUG00000000911	176.772	145.146	208.397	1.43577	0.521829	7.44228	0.431612	1	0.364906
																											ENSOCUG00000000915	1100.28	1025.57	1174.98	1.14569	0.196211	10.1003	0.714364	1	0.146081
																											ENSOCUG00000000916	220.973	194.801	247.144	1.2687	0.34335	7.77753	0.590252	1	0.228963
																											ENSOCUG00000000919	558.045	641.698	474.391	0.739274	-0.435818	9.10784	0.437081	1	0.359438
																											ENSOCUG00000000920	102.662	85.9417	119.383	1.38912	0.474169	6.66237	0.534789	1	0.271818
																											ENSOCUG00000000921	450.537	341.857	559.216	1.63582	0.710012	8.77226	0.215355	1	0.666844
																											ENSOCUG00000000922	579.446	534.749	624.144	1.16717	0.223018	9.17423	0.690959	1	0.160547
																											ENSOCUG00000000923	9.11778	17.1883	1.04722	0.0609262	-4.03679	2.08496	0.140686	1	0.851748
																											ENSOCUG00000000924	31.6489	27.6923	35.6055	1.28575	0.362614	4.97272	0.775221	1	0.110574
																											ENSOCUG00000000925	333	303.661	362.338	1.19323	0.254877	8.37376	0.669962	1	0.17395
																											ENSOCUG00000000927	1007.79	934.855	1080.73	1.15604	0.209194	9.9732	0.697677	1	0.156346
																											ENSOCUG00000000928	85.5074	105.04	65.9749	0.628094	-0.670948	6.37932	0.404041	1	0.393574
																											ENSOCUG00000000929	134.221	148.011	120.43	0.81366	-0.297502	7.06081	0.678725	1	0.168306
																											ENSOCUG00000000930	157.586	206.26	108.911	0.528027	-0.921316	7.22766	0.176059	1	0.754341
																											ENSOCUG00000000931	199.877	252.096	147.658	0.585723	-0.771711	7.59197	0.232929	1	0.632776
																											ENSOCUG00000000933	354.297	285.518	423.077	1.48179	0.567342	8.44111	0.335575	1	0.474211
																											ENSOCUG00000000936	1.52468	0.954908	2.09444	2.19334	1.13313	0.5	0.983403	1	0.00726868
																											ENSOCUG00000000937	565.126	571.035	559.216	0.979302	-0.0301737	9.14235	0.960384	1	0.017555
																											ENSOCUG00000000938	136.376	125.093	147.658	1.18039	0.23926	7.08649	0.739927	1	0.130811
																											ENSOCUG00000000939	599.362	610.186	588.538	0.964522	-0.0521138	9.22705	0.928404	1	0.0322631
																											ENSOCUG00000000940	126.952	157.56	96.3443	0.611478	-0.709628	6.94494	0.322201	1	0.491873
																											ENSOCUG00000000941	3444.27	3532.21	3356.34	0.950212	-0.0736789	11.7495	0.886904	1	0.0521235
																											ENSOCUG00000000942	478.528	531.884	425.172	0.799369	-0.323066	8.89343	0.570963	1	0.243392
																											ENSOCUG00000000943	42.3073	56.3396	28.275	0.501867	-0.994624	5.31877	0.338783	1	0.470079
																											ENSOCUG00000000944	55.7668	48.7003	62.8333	1.2902	0.367597	5.78966	0.70233	1	0.153459
																											ENSOCUG00000000945	19.4054	21.008	17.8028	0.847428	-0.238837	4.27345	0.905262	1	0.0432258
																											ENSOCUG00000000947	31.9115	43.9258	19.8972	0.452973	-1.1425	4.88574	0.331592	1	0.479396
																											ENSOCUG00000000953	20.7916	24.8276	16.7555	0.674875	-0.567308	4.35022	0.711025	1	0.148115
																											ENSOCUG00000000956	269.84	245.411	294.269	1.19908	0.261934	8.07003	0.671665	1	0.172847
																											ENSOCUG00000000957	19.6982	25.7825	13.6139	0.528027	-0.921316	4.22766	0.542125	1	0.265901
																											ENSOCUG00000000958	634.919	546.208	723.63	1.32483	0.405803	9.29621	0.464245	1	0.333253
																											ENSOCUG00000000959	1391.4	1209.87	1572.93	1.30008	0.3786	10.4299	0.474397	1	0.323858
																											ENSOCUG00000000960	300.338	361.91	238.766	0.659739	-0.600032	8.19947	0.319834	1	0.495075
																											ENSOCUG00000000962	28.415	29.6022	27.2277	0.919789	-0.120625	4.82732	0.952213	1	0.0212658
																											ENSOCUG00000000963	228.028	232.998	223.058	0.957341	-0.0628957	7.83272	0.927523	1	0.0326751
																											ENSOCUG00000000965	58.2002	52.52	63.8805	1.21631	0.28251	5.85605	0.76971	1	0.113673
																											ENSOCUG00000000966	604.352	604.457	604.247	0.999652	-0.000502148	9.23924	1	1	0
																											ENSOCUG00000000967	1323.79	1167.85	1479.72	1.26705	0.341469	10.3604	0.519691	1	0.284254
																											ENSOCUG00000000968	104.202	64.9338	143.469	2.20947	1.1437	6.59275	0.131012	1	0.882688
																											ENSOCUG00000000972	7.23823	1.90982	12.5667	6.58003	2.71809	2.29248	0.337602	1	0.471595
																											ENSOCUG00000000973	6.14486	2.86472	9.42499	3.29002	1.71809	2.37744	0.581942	1	0.235121
																											ENSOCUG00000000974	44.3397	46.7905	41.8888	0.895242	-0.15965	5.46832	0.895988	1	0.0476977
																											ENSOCUG00000000978	6747.92	7460.7	6035.13	0.808924	-0.305925	12.7121	0.549995	1	0.259641
																											ENSOCUG00000000979	43.8463	35.3316	52.3611	1.48199	0.567535	5.42665	0.584807	1	0.232987
																											ENSOCUG00000000980	483.361	486.048	480.674	0.988944	-0.0160395	8.91694	0.98155	1	0.00808742
																											ENSOCUG00000000981	27.1672	22.9178	31.4166	1.37084	0.45506	4.74593	0.734651	1	0.133919
																											ENSOCUG00000000982	287.153	298.886	275.419	0.921485	-0.117968	8.16447	0.850636	1	0.0702563
																											ENSOCUG00000000983	936.474	926.261	946.688	1.02205	0.0314701	9.87101	0.955517	1	0.0197615
																											ENSOCUG00000000986	4.91301	6.68436	3.14166	0.470002	-1.08926	2.19616	0.793008	1	0.100722
																											ENSOCUG00000000987	914.761	952.998	876.524	0.919754	-0.12068	9.83599	0.824662	1	0.0837242
																											ENSOCUG00000000988	405.228	315.12	495.336	1.5719	0.652506	8.62601	0.260286	1	0.584549
																											ENSOCUG00000000989	1260.53	1198.41	1322.64	1.10366	0.142299	10.2981	0.789676	1	0.102551
																											ENSOCUG00000000990	6.29922	10.504	2.09444	0.199395	-2.3263	2.22972	0.455604	1	0.341412
																											ENSOCUG00000000991	197.041	202.441	191.641	0.946656	-0.0790886	7.62181	0.910464	1	0.0407373
																											ENSOCUG00000000996	232.05	279.788	184.311	0.658752	-0.602193	7.82709	0.338382	1	0.470593
																											ENSOCUG00000000997	150.515	157.56	143.469	0.91057	-0.135158	7.23218	0.852197	1	0.06946
																											ENSOCUG00000000998	148.498	177.613	119.383	0.672154	-0.573137	7.18602	0.4064	1	0.391046
																											ENSOCUG00000000999	109.872	131.777	87.9666	0.667539	-0.583075	6.75042	0.43493	1	0.361581
																											ENSOCUG00000001001	73.8321	64.9338	82.7305	1.27407	0.34945	6.19562	0.685553	1	0.163959
																											ENSOCUG00000001002	56.3063	59.2043	53.4083	0.902101	-0.148639	5.81331	0.890241	1	0.0504923
																											ENSOCUG00000001005	504.723	509.921	499.524	0.979611	-0.0297184	8.97927	0.961861	1	0.0168878
																											ENSOCUG00000001008	369.625	380.053	359.197	0.945122	-0.0814278	8.52934	0.893712	1	0.0488023
																											ENSOCUG00000001009	636.553	588.223	684.883	1.16432	0.219492	9.30997	0.693178	1	0.159155
																											ENSOCUG00000001011	67.5488	64.9338	70.1638	1.08054	0.111758	6.07678	0.913976	1	0.0390651
																											ENSOCUG00000001013	1902.56	1759.9	2045.22	1.16213	0.216768	10.8897	0.678936	1	0.168171
																											ENSOCUG00000001016	105.667	121.273	90.061	0.742628	-0.429288	6.70747	0.57225	1	0.242414
																											ENSOCUG00000001020	278.419	252.096	304.741	1.20883	0.273613	8.11463	0.655985	1	0.183106
																											ENSOCUG00000001023	722.972	761.062	684.883	0.899904	-0.152157	9.49579	0.783114	1	0.106175
																											ENSOCUG00000001026	1060.57	991.195	1129.95	1.13999	0.18902	10.0475	0.72499	1	0.139668
																											ENSOCUG00000001027	3.48065	3.81963	3.14166	0.822504	-0.281905	1.79248	1	1	0
																											ENSOCUG00000001028	419.983	345.677	494.288	1.42991	0.515929	8.69124	0.371305	1	0.43027
																											ENSOCUG00000001029	10.3035	14.3236	6.28333	0.438669	-1.1888	3.24593	0.59142	1	0.228104
																											ENSOCUG00000001031	242.196	221.539	262.852	1.18649	0.246695	7.91476	0.695747	1	0.157549
																											ENSOCUG00000001033	2.52574	1.90982	3.14166	1.64501	0.718095	1.29248	0.975926	1	0.010583
																											ENSOCUG00000001034	476.316	328.488	624.144	1.90005	0.926036	8.82272	0.105031	1	0.978684
																											ENSOCUG00000001035	5942.09	6745.47	5138.71	0.761802	-0.392512	12.5234	0.443857	1	0.352757
																											ENSOCUG00000001039	120.529	127.958	113.1	0.883885	-0.17807	6.91049	0.815037	1	0.0888227
																											ENSOCUG00000001040	14.1231	21.9629	6.28333	0.286088	-1.80547	3.55426	0.317753	1	0.497911
																											ENSOCUG00000001041	18.2658	22.9178	13.6139	0.594031	-0.751391	4.1427	0.639328	1	0.194276
																											ENSOCUG00000001042	5560.03	5225.26	5894.81	1.12814	0.173942	12.4383	0.734417	1	0.134057
																											ENSOCUG00000001043	884.17	1152.57	615.766	0.534253	-0.904406	9.71844	0.0964613	1	1.01565
																											ENSOCUG00000001045	28.6919	23.8727	33.5111	1.40374	0.489276	4.82193	0.704884	1	0.151882
																											ENSOCUG00000001047	77.8538	111.724	43.9833	0.393677	-1.34492	6.13134	0.10614	1	0.974123
																											ENSOCUG00000001048	174.4	150.875	197.925	1.31184	0.391594	7.43301	0.557799	1	0.253522
																											ENSOCUG00000001050	605.367	583.449	627.285	1.07513	0.104516	9.24072	0.853342	1	0.0688768
																											ENSOCUG00000001051	30.2468	13.3687	47.1249	3.52502	1.81763	4.6496	0.134905	1	0.869971
																											ENSOCUG00000001052	172.045	167.109	176.98	1.05907	0.0828004	7.42605	0.909497	1	0.0411988
																											ENSOCUG00000001053	80.1616	63.9789	96.3443	1.50588	0.590605	6.29483	0.472408	1	0.325682
																											ENSOCUG00000001054	4555.58	3917.99	5193.17	1.32547	0.406502	12.1391	0.429201	1	0.367339
																											ENSOCUG00000001055	206.065	189.072	223.058	1.17975	0.238485	7.68203	0.714514	1	0.145989
																											ENSOCUG00000001057	412.396	459.311	365.48	0.795714	-0.329678	8.67849	0.569588	1	0.244439
																											ENSOCUG00000001058	357.977	263.555	452.399	1.71653	0.779495	8.43171	0.185739	1	0.731097
																											ENSOCUG00000001060	510.562	562.441	458.683	0.815522	-0.294205	8.98846	0.603658	1	0.219209
																											ENSOCUG00000001061	102.308	71.6181	132.997	1.85703	0.892998	6.60875	0.23954	1	0.620621
																											ENSOCUG00000001062	147.912	168.064	127.761	0.760193	-0.395562	7.19508	0.56917	1	0.244758
																											ENSOCUG00000001069	258.628	228.223	289.033	1.26645	0.34079	8.0047	0.582405	1	0.234775
																											ENSOCUG00000001072	18.0192	17.1883	18.85	1.09667	0.133132	4.16993	0.970238	1	0.0131219
																											ENSOCUG00000001073	623.721	507.056	740.385	1.46016	0.54613	9.25907	0.325326	1	0.487681
																											ENSOCUG00000001075	4.48171	4.77454	4.18888	0.877338	-0.188796	2.16096	1	1	0
																											ENSOCUG00000001076	84.89	74.4828	95.2971	1.27945	0.355524	6.3966	0.664708	1	0.177369
																											ENSOCUG00000001078	559.152	618.781	499.524	0.807272	-0.308873	9.11885	0.58226	1	0.234883
																											ENSOCUG00000001081	66.0862	73.5279	58.6444	0.79758	-0.3263	6.03707	0.71868	1	0.143464
																											ENSOCUG00000001082	121.974	76.3927	167.555	2.19334	1.13313	6.82193	0.118413	1	0.926601
																											ENSOCUG00000001084	36.0383	34.3767	37.7	1.09667	0.133132	5.16993	0.929405	1	0.031795
																											ENSOCUG00000001086	14.1995	9.54908	18.85	1.97401	0.981129	3.74593	0.588819	1	0.230018
																											ENSOCUG00000001088	223.807	211.99	235.625	1.11149	0.152497	7.8041	0.814781	1	0.0889589
																											ENSOCUG00000001090	34.6983	29.6022	39.7944	1.34431	0.426863	5.10106	0.71881	1	0.143386
																											ENSOCUG00000001093	304.464	319.894	289.033	0.903527	-0.146361	8.24827	0.81183	1	0.0905349
																											ENSOCUG00000001096	174.203	209.125	139.28	0.666015	-0.586373	7.41503	0.378321	1	0.422139
																											ENSOCUG00000001097	42.2293	36.2865	48.1722	1.32755	0.408766	5.38574	0.705216	1	0.151678
																											ENSOCUG00000001100	20.2521	14.3236	26.1805	1.82779	0.870098	4.27537	0.558475	1	0.252996
																											ENSOCUG00000001101	689.304	688.489	690.119	1.00237	0.00341124	9.429	0.998069	1	0.000839603
																											ENSOCUG00000001103	8.3475	11.4589	5.23611	0.456947	-1.1299	2.95345	0.662507	1	0.178809
																											ENSOCUG00000001104	1251.39	1138.25	1364.53	1.19879	0.261585	10.2834	0.622919	1	0.205568
																											ENSOCUG00000001106	2259.69	2593.53	1925.84	0.742555	-0.42943	11.126	0.409879	1	0.387344
																											ENSOCUG00000001107	156.983	153.74	160.225	1.04218	0.059603	7.29415	0.939771	1	0.0269779
																											ENSOCUG00000001108	1075.31	1043.71	1106.91	1.06055	0.084814	10.0699	0.875528	1	0.0577299
																											ENSOCUG00000001109	707.66	677.03	738.291	1.09048	0.12497	9.46556	0.821905	1	0.0851783
																											ENSOCUG00000001110	8.28546	1.90982	14.6611	7.6767	2.94049	2.40368	0.262008	1	0.581685
																											ENSOCUG00000001111	1000.47	1032.26	968.679	0.93841	-0.0917092	9.96573	0.866012	1	0.0624759
																											ENSOCUG00000001112	114.522	122.228	106.817	0.87391	-0.194443	6.83621	0.800412	1	0.0966867
																											ENSOCUG00000001113	1566.56	1583.24	1549.89	0.978935	-0.0307148	10.6133	0.954751	1	0.02011
																											ENSOCUG00000001116	64.2989	56.3396	72.2583	1.28255	0.359013	5.99558	0.69278	1	0.159404
																											ENSOCUG00000001119	146.787	148.011	145.564	0.983467	-0.0240513	7.19753	0.98331	1	0.00730975
																											ENSOCUG00000001120	2440.51	2806.48	2074.54	0.739199	-0.435964	11.2366	0.401912	1	0.395869
																											ENSOCUG00000001121	339.27	358.091	320.45	0.894884	-0.160227	8.40407	0.790263	1	0.102228
																											ENSOCUG00000001124	14.8313	18.1433	11.5194	0.634915	-0.655364	3.85368	0.724711	1	0.139835
																											ENSOCUG00000001125	120.804	89.7614	151.847	1.69167	0.758452	6.86725	0.295627	1	0.529256
																											ENSOCUG00000001127	81.4873	90.7163	72.2583	0.79653	-0.328199	6.33919	0.694802	1	0.158139
																											ENSOCUG00000001130	65.4385	54.4298	76.4471	1.40451	0.490067	6.01136	0.581151	1	0.235711
																											ENSOCUG00000001131	567.505	727.64	407.369	0.55985	-0.836889	9.08864	0.136062	1	0.866264
																											ENSOCUG00000001136	326.689	380.053	273.325	0.719174	-0.475587	8.33227	0.425041	1	0.371569
																											ENSOCUG00000001137	691.357	786.844	595.869	0.757289	-0.401084	9.41939	0.466571	1	0.331082
																											ENSOCUG00000001138	886.603	809.762	963.443	1.18979	0.250702	9.78671	0.643803	1	0.191247
																											ENSOCUG00000001139	6.82283	10.504	3.14166	0.299092	-1.74134	2.5222	0.549878	1	0.259734
																											ENSOCUG00000001142	45.8341	59.2043	32.4639	0.548336	-0.866868	5.4542	0.38941	1	0.409593
																											ENSOCUG00000001143	90.7261	62.069	119.383	1.92339	0.943654	6.42763	0.23044	1	0.637442
																											ENSOCUG00000001144	565.737	471.725	659.749	1.39859	0.483973	9.12379	0.387349	1	0.411898
																											ENSOCUG00000001145	2.43343	3.81963	1.04722	0.274168	-1.86687	1	0.816043	1	0.088287
																											ENSOCUG00000001150	12.5984	21.008	4.18888	0.199395	-2.3263	3.22972	0.237362	1	0.624589
																											ENSOCUG00000001151	31.2638	24.8276	37.7	1.51847	0.602617	4.93518	0.619346	1	0.208067
																											ENSOCUG00000001152	108.239	122.228	94.2499	0.771097	-0.375015	6.74593	0.620691	1	0.207125
																											ENSOCUG00000001153	12.5364	11.4589	13.6139	1.18806	0.248609	3.6427	0.937456	1	0.0280493
																											ENSOCUG00000001155	3782.76	4253.16	3312.36	0.7788	-0.360676	11.874	0.484129	1	0.315039
																											ENSOCUG00000001156	14.338	6.68436	21.9916	3.29002	1.71809	3.59984	0.333294	1	0.477172
																											ENSOCUG00000001161	714.12	825.041	603.199	0.731115	-0.45183	9.46241	0.410914	1	0.386249
																											ENSOCUG00000001162	1.47852	1.90982	1.04722	0.548336	-0.866868	0.5	1	1	0
																											ENSOCUG00000001163	154.764	134.642	174.886	1.2989	0.377285	7.26163	0.583087	1	0.234267
																											ENSOCUG00000001164	926.585	870.876	982.293	1.12794	0.173686	9.85317	0.748627	1	0.125735
																											ENSOCUG00000001165	172.969	180.478	165.461	0.916795	-0.12533	7.43301	0.858136	1	0.0664439
																											ENSOCUG00000001166	201.12	161.379	240.861	1.49251	0.577743	7.62318	0.370913	1	0.430728
																											ENSOCUG00000001168	609.465	617.826	601.105	0.972936	-0.0395829	9.25126	0.946298	1	0.0239719
																											ENSOCUG00000001169	549.713	640.743	458.683	0.71586	-0.48225	9.08248	0.390431	1	0.408456
																											ENSOCUG00000001170	285.335	293.157	277.514	0.946639	-0.0791143	8.15597	0.901824	1	0.0448781
																											ENSOCUG00000001171	19.4213	31.512	7.33055	0.232627	-2.10391	3.92587	0.170151	1	0.769165
																											ENSOCUG00000001172	9.53319	8.59417	10.4722	1.21852	0.285135	3.24593	0.945745	1	0.0242257
																											ENSOCUG00000001173	19.7285	14.3236	25.1333	1.75468	0.811204	4.24593	0.59272	1	0.227151
																											ENSOCUG00000001174	16.633	13.3687	19.8972	1.48834	0.573705	4.02764	0.743428	1	0.128761
																											ENSOCUG00000001175	713.229	550.982	875.477	1.58894	0.668064	9.43989	0.224476	1	0.648831
																											ENSOCUG00000001177	448.555	447.852	449.258	1.00314	0.00452176	8.80914	0.99816	1	0.000800054
																											ENSOCUG00000001178	65.2856	79.2574	51.3138	0.647433	-0.627198	5.99487	0.477676	1	0.320866
																											ENSOCUG00000001179	98.1202	104.085	92.1555	0.885387	-0.175621	6.61381	0.829974	1	0.0809354
																											ENSOCUG00000001180	70.0904	77.3476	62.8333	0.81235	-0.299827	6.12337	0.736253	1	0.132973
																											ENSOCUG00000001181	5.91408	7.63927	4.18888	0.548336	-0.866868	2.5	0.815091	1	0.0887939
																											ENSOCUG00000001183	24.3184	27.6923	20.9444	0.756325	-0.402921	4.58995	0.783066	1	0.106201
																											ENSOCUG00000001184	70.7381	96.4457	45.0305	0.4669	-1.09881	6.04224	0.198952	1	0.701251
																											ENSOCUG00000001186	601.793	549.072	654.513	1.19203	0.253426	9.22757	0.649927	1	0.187136
																											ENSOCUG00000001190	228.306	259.735	196.878	0.757994	-0.399742	7.82103	0.52752	1	0.277761
																											ENSOCUG00000001191	145.985	121.273	170.697	1.40754	0.493176	7.16871	0.477168	1	0.321329
																											ENSOCUG00000001196	1.00106	0.954908	1.04722	1.09667	0.133132	-1.1212e-15	1	1	0
																											ENSOCUG00000001197	207.251	186.207	228.294	1.22602	0.293986	7.68776	0.649916	1	0.187143
																											ENSOCUG00000001200	53.1026	49.6552	56.5499	1.13885	0.18758	5.72766	0.859811	1	0.0655969
																											ENSOCUG00000001201	13.06	11.4589	14.6611	1.27945	0.355524	3.69616	0.883306	1	0.053889
																											ENSOCUG00000001203	263.974	269.284	258.664	0.96056	-0.0580521	8.04396	0.931011	1	0.0310451
																											ENSOCUG00000001209	4.52787	3.81963	5.23611	1.37084	0.45506	2.16096	0.964633	1	0.0156378
																											ENSOCUG00000001211	87.4301	54.4298	120.43	2.21258	1.14573	6.33919	0.150829	1	0.821514
																											ENSOCUG00000001214	149.561	188.117	111.005	0.590087	-0.760999	7.17499	0.268963	1	0.570308
																											ENSOCUG00000001215	291.45	307.48	275.419	0.895729	-0.158866	8.18492	0.797068	1	0.0985047
																											ENSOCUG00000001216	231.507	204.35	258.664	1.26578	0.340032	7.84492	0.590652	1	0.228668
																											ENSOCUG00000001217	118.003	126.048	109.958	0.872353	-0.197017	6.87932	0.795741	1	0.0992283
																											ENSOCUG00000001218	16.5868	14.3236	18.85	1.31601	0.396166	4.03841	0.835015	1	0.0783059
																											ENSOCUG00000001219	5.43662	6.68436	4.18888	0.62667	-0.674223	2.40368	0.88347	1	0.0538081
																											ENSOCUG00000001220	1040.56	917.667	1163.46	1.26785	0.342383	10.013	0.523408	1	0.28116
																											ENSOCUG00000001221	115.6	110.769	120.43	1.08722	0.120641	6.85174	0.880039	1	0.055498
																											ENSOCUG00000001223	51.024	60.1592	41.8888	0.6963	-0.52222	5.6496	0.593887	1	0.226296
																											ENSOCUG00000001224	16.4022	18.1433	14.6611	0.808074	-0.307441	4.02764	0.883553	1	0.0537673
																											ENSOCUG00000001225	4.05041	2.86472	5.23611	1.82779	0.870098	1.95345	0.878483	1	0.0562668
																											ENSOCUG00000001228	186.983	161.379	212.586	1.3173	0.397589	7.53311	0.545635	1	0.263098
																											ENSOCUG00000001229	9.57935	7.63927	11.5194	1.50792	0.592564	3.22972	0.822937	1	0.0846334
																											ENSOCUG00000001231	1.47852	1.90982	1.04722	0.548336	-0.866868	0.5	1	1	0
																											ENSOCUG00000001232	3095.98	2624.09	3567.88	1.35967	0.443252	11.5792	0.391671	1	0.407079
																											ENSOCUG00000001233	163.528	169.974	157.083	0.924162	-0.113783	7.35228	0.874041	1	0.0584683
																											ENSOCUG00000001234	531.056	485.093	577.019	1.1895	0.250356	9.0473	0.657739	1	0.181946
																											ENSOCUG00000001235	461.237	618.781	303.694	0.490795	-1.02681	8.75988	0.0738876	1	1.13143
																											ENSOCUG00000001236	13.06	11.4589	14.6611	1.27945	0.355524	3.69616	0.883306	1	0.053889
																											ENSOCUG00000001239	94.3929	94.5359	94.2499	0.996974	-0.00437149	6.5606	1	1	0
																											ENSOCUG00000001241	21.8229	14.3236	29.3222	2.04712	1.0336	4.35712	0.465471	1	0.332107
																											ENSOCUG00000001242	938.203	684.669	1191.74	1.7406	0.799588	9.81906	0.139557	1	0.855248
																											ENSOCUG00000001246	43.9084	44.8807	42.9361	0.956671	-0.0639048	5.45607	0.974719	1	0.0111207
																											ENSOCUG00000001247	35.6993	30.5571	40.8416	1.33657	0.418534	5.1427	0.720739	1	0.142222
																											ENSOCUG00000001249	452.076	320.849	583.302	1.81799	0.862348	8.75693	0.132905	1	0.876458
																											ENSOCUG00000001250	852.678	850.823	854.532	1.00436	0.00627575	9.73585	0.993212	1	0.00295824
																											ENSOCUG00000001251	33.6972	28.6472	38.7472	1.35256	0.435695	5.05817	0.716783	1	0.144612
																											ENSOCUG00000001254	118.557	114.589	122.525	1.06926	0.0966062	6.88863	0.905611	1	0.0430582
																											ENSOCUG00000001255	4.00426	3.81963	4.18888	1.09667	0.133132	2	1	1	0
																											ENSOCUG00000001256	15.7863	20.0531	11.5194	0.574447	-0.799754	3.92587	0.646054	1	0.189731
																											ENSOCUG00000001257	3.48065	3.81963	3.14166	0.822504	-0.281905	1.79248	1	1	0
																											ENSOCUG00000001258	49.4691	70.6632	28.275	0.400137	-1.32143	5.48217	0.176788	1	0.752546
																											ENSOCUG00000001264	69.6289	86.8966	52.3611	0.602567	-0.730806	6.07583	0.395747	1	0.402582
																											ENSOCUG00000001265	8.10083	5.72945	10.4722	1.82779	0.870098	2.95345	0.751769	1	0.123915
																											ENSOCUG00000001266	165.023	182.387	147.658	0.809585	-0.304745	7.35849	0.654489	1	0.184098
																											ENSOCUG00000001267	313.104	336.128	290.08	0.863006	-0.212557	8.28659	0.725728	1	0.139226
																											ENSOCUG00000001269	683.627	805.943	561.31	0.696465	-0.521878	9.39359	0.343868	1	0.463609
																											ENSOCUG00000001270	71.5848	89.7614	53.4083	0.595003	-0.749031	6.11351	0.379316	1	0.420999
																											ENSOCUG00000001271	674.581	678.94	670.221	0.987159	-0.0186456	9.39782	0.975996	1	0.0105518
																											ENSOCUG00000001272	174.494	181.433	167.555	0.923513	-0.114795	7.44589	0.870477	1	0.0602425
																											ENSOCUG00000001278	15.0621	13.3687	16.7555	1.25334	0.325777	3.90368	0.882346	1	0.0543611
																											ENSOCUG00000001279	105.513	113.634	97.3916	0.857063	-0.222527	6.71699	0.776268	1	0.109989
																											ENSOCUG00000001280	11849.9	11828.4	11871.3	1.00362	0.00521687	13.5326	0.991998	1	0.0034891
																											ENSOCUG00000001281	270.58	262.6	278.561	1.06078	0.0851267	8.07929	0.895012	1	0.0481711
																											ENSOCUG00000001284	112.982	110.769	115.194	1.03995	0.0565108	6.81967	0.951611	1	0.0215407
																											ENSOCUG00000001286	2635.21	2439.79	2830.64	1.1602	0.21437	11.3597	0.679607	1	0.167742
																											ENSOCUG00000001288	3940.04	3815.81	4064.26	1.06511	0.0910039	11.9433	0.860009	1	0.065497
																											ENSOCUG00000001289	268.627	324.669	212.586	0.654778	-0.610923	8.03736	0.319445	1	0.495604
																											ENSOCUG00000001290	77.1266	40.1061	114.147	2.84612	1.509	6.08025	0.0711785	1	1.14765
																											ENSOCUG00000001292	1368.44	1392.26	1344.63	0.965793	-0.0502135	10.4181	0.925761	1	0.0335011
																											ENSOCUG00000001295	563.488	464.085	662.891	1.42838	0.514381	9.11544	0.358402	1	0.445629
																											ENSOCUG00000001296	28.8145	10.504	47.1249	4.48639	2.16555	4.47564	0.0857253	1	1.06689
																											ENSOCUG00000001297	1291.68	1247.11	1336.25	1.07148	0.0996055	10.3342	0.852194	1	0.0694615
																											ENSOCUG00000001298	1.52468	0.954908	2.09444	2.19334	1.13313	0.5	0.983403	1	0.00726868
																											ENSOCUG00000001299	567.424	642.653	492.194	0.765878	-0.384814	9.13549	0.49208	1	0.307964
																											ENSOCUG00000001300	15.1703	21.9629	8.37777	0.381451	-1.39043	3.76178	0.420793	1	0.375931
																											ENSOCUG00000001302	69.2725	40.1061	98.4388	2.45446	1.2954	5.97345	0.132982	1	0.876206
																											ENSOCUG00000001303	1575.75	1490.61	1660.89	1.11424	0.156054	10.6197	0.767524	1	0.114908
																											ENSOCUG00000001304	113.967	101.22	126.714	1.25186	0.324075	6.82339	0.665417	1	0.176906
																											ENSOCUG00000001305	247.419	275.968	218.869	0.793095	-0.334435	7.94114	0.592621	1	0.227223
																											ENSOCUG00000001306	279.741	213.899	345.583	1.61563	0.692099	8.08684	0.256113	1	0.591568
																											ENSOCUG00000001307	143.445	141.326	145.564	1.02998	0.0426197	7.1642	0.961839	1	0.0168978
																											ENSOCUG00000001309	42.1832	37.2414	47.1249	1.26539	0.339583	5.38863	0.757693	1	0.120507
																											ENSOCUG00000001310	46.2033	51.565	40.8416	0.792041	-0.336353	5.52014	0.750186	1	0.124831
																											ENSOCUG00000001311	260.216	271.194	249.239	0.919042	-0.121797	8.02228	0.848527	1	0.0713344
																											ENSOCUG00000001315	225.117	228.223	222.011	0.97278	-0.0398143	7.81439	0.957274	1	0.0189639
																											ENSOCUG00000001316	542.647	375.279	710.016	1.89197	0.919888	9.01176	0.102975	1	0.987269
																											ENSOCUG00000001317	58.0315	66.8436	49.2194	0.736337	-0.441562	5.84194	0.637433	1	0.195565
																											ENSOCUG00000001319	369.426	405.836	333.016	0.820569	-0.285304	8.5221	0.627955	1	0.202071
																											ENSOCUG00000001320	59.0325	67.7985	50.2666	0.741412	-0.431653	5.86735	0.643124	1	0.191705
																											ENSOCUG00000001324	3609.18	3478.73	3739.63	1.075	0.104333	11.8165	0.839945	1	0.0757494
																											ENSOCUG00000001328	109.409	108.86	109.958	1.01009	0.0144875	6.77357	0.998578	1	0.000617956
																											ENSOCUG00000001331	2.91088	4.77454	1.04722	0.219334	-2.1888	1.16096	0.727421	1	0.138214
																											ENSOCUG00000001334	1759.52	1664.41	1854.63	1.11429	0.156124	10.7789	0.766481	1	0.115499
																											ENSOCUG00000001335	19.3131	22.9178	15.7083	0.68542	-0.54494	4.24593	0.735225	1	0.13358
																											ENSOCUG00000001336	437.987	384.828	491.147	1.27628	0.35194	8.76404	0.540632	1	0.267098
																											ENSOCUG00000001337	89.2953	91.6712	86.9193	0.948164	-0.076791	6.48	0.937225	1	0.0281561
																											ENSOCUG00000001338	355.053	313.21	396.897	1.26719	0.341634	8.4618	0.562892	1	0.249575
																											ENSOCUG00000001343	900.659	1038.94	762.377	0.733803	-0.446536	9.79763	0.409159	1	0.388108
																											ENSOCUG00000001349	785.458	909.073	661.844	0.728043	-0.457905	9.5993	0.401476	1	0.396341
																											ENSOCUG00000001350	3.57296	1.90982	5.23611	2.74168	1.45506	1.66096	0.782367	1	0.106589
																											ENSOCUG00000001352	372.783	390.557	355.008	0.908977	-0.137684	8.54055	0.817434	1	0.0875471
																											ENSOCUG00000001355	4.91301	6.68436	3.14166	0.470002	-1.08926	2.19616	0.793008	1	0.100722
																											ENSOCUG00000001357	490.109	541.433	438.786	0.810415	-0.303266	8.92901	0.59403	1	0.226192
																											ENSOCUG00000001360	25.2271	30.5571	19.8972	0.651149	-0.61894	4.62396	0.648563	1	0.188048
																											ENSOCUG00000001362	133.111	138.462	127.761	0.922717	-0.11604	7.05532	0.879358	1	0.0558344
																											ENSOCUG00000001366	26.1359	33.4218	18.85	0.564003	-0.826226	4.6496	0.527252	1	0.277982
																											ENSOCUG00000001368	1.52468	0.954908	2.09444	2.19334	1.13313	0.5	0.983403	1	0.00726868
																											ENSOCUG00000001373	5.29815	9.54908	1.04722	0.109667	-3.1888	1.66096	0.394998	1	0.403406
																											ENSOCUG00000001375	390.138	378.144	402.133	1.06344	0.0887379	8.60716	0.882687	1	0.0541932
																											ENSOCUG00000001378	85.0602	92.6261	77.4944	0.836636	-0.257327	6.40468	0.758223	1	0.120203
																											ENSOCUG00000001379	23.3635	25.7825	20.9444	0.81235	-0.299827	4.53841	0.851191	1	0.0699732
																											ENSOCUG00000001382	152.485	138.462	166.508	1.20256	0.266106	7.2464	0.702508	1	0.153349
																											ENSOCUG00000001383	764.937	748.648	781.227	1.04352	0.061454	9.57887	0.912673	1	0.0396847
																											ENSOCUG00000001384	34.2829	38.1963	30.3694	0.795087	-0.330815	5.08995	0.788579	1	0.103155
																											ENSOCUG00000001385	1.00106	0.954908	1.04722	1.09667	0.133132	-1.1212e-15	1	1	0
																											ENSOCUG00000001386	417.063	492.733	341.394	0.692859	-0.529367	8.67998	0.359549	1	0.444242
																											ENSOCUG00000001387	1.52468	0.954908	2.09444	2.19334	1.13313	0.5	0.983403	1	0.00726868
																											ENSOCUG00000001389	6.23717	0.954908	11.5194	12.0634	3.59256	1.72972	0.285424	1	0.54451
																											ENSOCUG00000001390	1492.36	1590.88	1393.85	0.876153	-0.190746	10.5402	0.718229	1	0.143737
																											ENSOCUG00000001391	108.362	108.86	107.864	0.990853	-0.0132575	6.7597	1	1	0
																											ENSOCUG00000001392	192.575	208.17	176.98	0.850172	-0.234173	7.58453	0.723669	1	0.14046
																											ENSOCUG00000001393	4.00426	3.81963	4.18888	1.09667	0.133132	2	1	1	0
																											ENSOCUG00000001396	3119.99	3925.63	2314.36	0.589551	-0.762311	11.5576	0.142021	1	0.847646
																											ENSOCUG00000001397	572.872	562.441	583.302	1.03709	0.0525417	9.16183	0.928171	1	0.0323721
																											ENSOCUG00000001398	366.359	360.955	371.763	1.02994	0.0425648	8.51696	0.946945	1	0.0236751
																											ENSOCUG00000001401	1054.41	945.359	1163.46	1.23071	0.29949	10.0345	0.576574	1	0.239145
																											ENSOCUG00000001402	354.931	326.579	383.283	1.17363	0.230979	8.46678	0.697157	1	0.156669
																											ENSOCUG00000001406	114.075	109.814	118.336	1.0776	0.107821	6.83283	0.894703	1	0.0483213
																											ENSOCUG00000001407	59.647	33.4218	85.8721	2.56935	1.3614	5.74342	0.134593	1	0.870978
																											ENSOCUG00000001408	15.1544	11.4589	18.85	1.64501	0.718095	3.87744	0.690154	1	0.161054
																											ENSOCUG00000001409	447.549	349.496	545.602	1.56111	0.642572	8.77042	0.26227	1	0.581252
																											ENSOCUG00000001412	2286.05	1614.75	2957.35	1.83146	0.872995	11.0936	0.0953756	1	1.02056
																											ENSOCUG00000001414	1907.17	1913.64	1900.71	0.993243	-0.00978093	10.8972	0.986217	1	0.00602731
																											ENSOCUG00000001415	14.4462	15.2785	13.6139	0.891046	-0.166428	3.85022	0.96687	1	0.0146318
																											ENSOCUG00000001418	327.135	360	294.269	0.817413	-0.290862	8.34642	0.627071	1	0.202684
																											ENSOCUG00000001419	653.996	476.499	831.494	1.74501	0.803231	9.29795	0.147393	1	0.831522
																											ENSOCUG00000001420	129.476	127.003	131.95	1.03895	0.0551295	7.01628	0.949673	1	0.0224259
																											ENSOCUG00000001422	177.437	207.215	147.658	0.712584	-0.488868	7.45055	0.461551	1	0.335781
																											ENSOCUG00000001425	372.673	349.496	395.85	1.13263	0.179675	8.53897	0.761621	1	0.118261
																											ENSOCUG00000001426	232.155	223.449	240.861	1.07793	0.108257	7.85793	0.869171	1	0.0608948
																											ENSOCUG00000001427	90.1579	95.4908	84.8249	0.888304	-0.170874	6.49185	0.840069	1	0.0756848
																											ENSOCUG00000001428	255.521	314.165	196.878	0.62667	-0.674223	7.95827	0.275828	1	0.559362
																											ENSOCUG00000001429	45.4187	67.7985	23.0389	0.339814	-1.55718	5.30459	0.125983	1	0.899688
																											ENSOCUG00000001430	1387.38	1357.88	1416.89	1.04346	0.0613724	10.4378	0.908864	1	0.0415012
																											ENSOCUG00000001432	1165.7	1069.5	1261.9	1.1799	0.238666	10.1821	0.654901	1	0.183824
																											ENSOCUG00000001434	282.455	276.923	287.986	1.03995	0.0565108	8.1416	0.93182	1	0.0306682
																											ENSOCUG00000001435	969.906	873.741	1066.07	1.22012	0.287026	9.91457	0.594312	1	0.225985
																											ENSOCUG00000001436	214.476	242.547	186.405	0.768534	-0.379819	7.73221	0.553297	1	0.257042
																											ENSOCUG00000001437	29.7391	23.8727	35.6055	1.49147	0.576739	4.86566	0.644085	1	0.191057
																											ENSOCUG00000001438	180.962	177.613	184.311	1.03771	0.0534048	7.4993	0.94411	1	0.0249775
																											ENSOCUG00000001439	2070.75	2277.46	1864.05	0.818481	-0.28898	11.0087	0.579988	1	0.236581
																											ENSOCUG00000001443	310.438	304.616	316.261	1.03823	0.0541242	8.27791	0.933494	1	0.0298886
																											ENSOCUG00000001444	668.218	626.42	710.016	1.13345	0.180721	9.38135	0.744759	1	0.127984
																											ENSOCUG00000001446	54.1195	61.1141	47.1249	0.771097	-0.375015	5.74593	0.700365	1	0.154676
																											ENSOCUG00000001447	1288.66	1450.51	1126.81	0.776839	-0.364312	10.3202	0.492711	1	0.307408
																											ENSOCUG00000001448	68.3176	38.1963	98.4388	2.57718	1.36579	5.93826	0.115424	1	0.937704
																											ENSOCUG00000001452	43.2304	37.2414	49.2194	1.32163	0.402319	5.42	0.706958	1	0.150606
																											ENSOCUG00000001455	3438.83	3612.42	3265.24	0.903892	-0.145778	11.7459	0.77782	1	0.109121
																											ENSOCUG00000001456	139.732	109.814	169.65	1.54488	0.627492	7.09267	0.369612	1	0.432254
																											ENSOCUG00000001458	86.6772	91.6712	81.6832	0.891046	-0.166428	6.43518	0.846989	1	0.0721224
																											ENSOCUG00000001459	274.4	270.239	278.561	1.03079	0.0437562	8.09997	0.949124	1	0.0226772
																											ENSOCUG00000001460	293.326	257.825	328.827	1.27539	0.350937	8.18572	0.563105	1	0.24941
																											ENSOCUG00000001462	10.5804	8.59417	12.5667	1.46223	0.54817	3.37744	0.825711	1	0.0831719
																											ENSOCUG00000001464	395.051	384.828	405.275	1.05313	0.0746858	8.62541	0.901759	1	0.0449093
																											ENSOCUG00000001465	67.2575	92.6261	41.8888	0.452236	-1.14485	5.96092	0.188659	1	0.724323
																											ENSOCUG00000001466	374.32	337.083	411.558	1.22094	0.287993	8.54095	0.623947	1	0.204852
																											ENSOCUG00000001467	697.517	800.213	594.822	0.743329	-0.427927	9.43028	0.436928	1	0.35959
																											ENSOCUG00000001468	2869.83	3154.06	2585.59	0.819765	-0.286718	11.4796	0.579923	1	0.23663
																											ENSOCUG00000001469	484.008	472.68	495.336	1.04793	0.0675437	8.91849	0.908764	1	0.041549
																											ENSOCUG00000001470	249.434	223.449	275.419	1.23258	0.301686	7.95464	0.629248	1	0.201178
																											ENSOCUG00000001473	21.8229	14.3236	29.3222	2.04712	1.0336	4.35712	0.465471	1	0.332107
																											ENSOCUG00000001475	1213.85	1308.22	1119.48	0.855724	-0.224782	10.241	0.673302	1	0.17179
																											ENSOCUG00000001477	1.52468	0.954908	2.09444	2.19334	1.13313	0.5	0.983403	1	0.00726868
																											ENSOCUG00000001478	124.563	120.318	128.808	1.07056	0.0983666	6.9599	0.901817	1	0.0448817
																											ENSOCUG00000001479	2004.7	2474.17	1535.23	0.620502	-0.688492	10.9285	0.188854	1	0.723873
																											ENSOCUG00000001480	81.7483	74.4828	89.0138	1.19509	0.257121	6.3474	0.761555	1	0.118299
																											ENSOCUG00000001481	31.5725	40.1061	23.0389	0.574447	-0.799754	4.92587	0.502193	1	0.299129
																											ENSOCUG00000001485	3.91195	5.72945	2.09444	0.365557	-1.45183	1.79248	0.765286	1	0.116176
																											ENSOCUG00000001486	16.3401	8.59417	24.0861	2.80261	1.48677	3.84674	0.366335	1	0.436121
																											ENSOCUG00000001488	27.7529	32.4669	23.0389	0.709611	-0.494899	4.77345	0.707245	1	0.15043
																											ENSOCUG00000001489	304.958	363.82	246.097	0.676425	-0.563998	8.22508	0.34869	1	0.457561
																											ENSOCUG00000001496	426.78	465.04	388.519	0.835452	-0.259371	8.73153	0.654042	1	0.184394
																											ENSOCUG00000001497	5.62125	2.86472	8.37777	2.92446	1.54817	2.29248	0.646776	1	0.189246
																											ENSOCUG00000001498	586.07	571.035	601.105	1.05266	0.0740373	9.19445	0.897183	1	0.047119
																											ENSOCUG00000001499	206.648	133.687	279.608	2.09151	1.06454	7.59499	0.0985946	1	1.00615
																											ENSOCUG00000001500	453.436	433.528	473.344	1.09184	0.126763	8.82336	0.827498	1	0.0822333
																											ENSOCUG00000001501	24.2563	18.1433	30.3694	1.67387	0.743186	4.55295	0.58545	1	0.23251
																											ENSOCUG00000001504	1641.83	1748.44	1535.23	0.878056	-0.187615	10.678	0.721688	1	0.141651
																											ENSOCUG00000001510	1.00106	0.954908	1.04722	1.09667	0.133132	-1.1212e-15	1	1	0
																											ENSOCUG00000001513	148.527	133.687	163.366	1.22201	0.289251	7.20734	0.679204	1	0.168
																											ENSOCUG00000001517	200.168	224.403	175.933	0.784004	-0.351067	7.63442	0.589365	1	0.229615
																											ENSOCUG00000001518	2.95704	3.81963	2.09444	0.548336	-0.866868	1.5	0.930457	1	0.0313035
																											ENSOCUG00000001519	238.517	275.968	201.066	0.728585	-0.456831	7.87994	0.466137	1	0.331487
																											ENSOCUG00000001524	120.683	135.597	105.769	0.780027	-0.358404	6.90398	0.625915	1	0.203484
																											ENSOCUG00000001530	1025.43	1079.05	971.821	0.90063	-0.150994	10	0.77953	1	0.108167
																											ENSOCUG00000001532	247.666	281.698	213.633	0.758377	-0.399014	7.9385	0.522213	1	0.282152
																											ENSOCUG00000001535	239.116	231.088	247.144	1.06948	0.0969118	7.90075	0.882807	1	0.054134
																											ENSOCUG00000001536	53.4098	32.4669	74.3527	2.29011	1.19542	5.6186	0.206006	1	0.686121
																											ENSOCUG00000001537	243.353	262.6	224.105	0.85341	-0.228689	7.92238	0.717355	1	0.144266
																											ENSOCUG00000001539	7.53106	6.68436	8.37777	1.25334	0.325777	2.90368	0.952295	1	0.0212284
																											ENSOCUG00000001540	515.15	543.343	486.958	0.896226	-0.158066	9.00669	0.781747	1	0.106934
																											ENSOCUG00000001541	40.5662	38.1963	42.9361	1.12409	0.168756	5.33974	0.894392	1	0.0484722
																											ENSOCUG00000001542	68.4734	78.3025	58.6444	0.748947	-0.417065	6.08245	0.635868	1	0.196633
																											ENSOCUG00000001543	313.32	353.316	273.325	0.773598	-0.370343	8.27964	0.537625	1	0.26952
																											ENSOCUG00000001544	270.07	208.17	331.969	1.5947	0.673287	8.03826	0.271867	1	0.565644
																											ENSOCUG00000001545	66.2549	59.2043	73.3055	1.23818	0.308219	6.04174	0.734061	1	0.134268
																											ENSOCUG00000001546	3.00319	2.86472	3.14166	1.09667	0.133132	1.58496	1	1	0
																											ENSOCUG00000001548	5.14379	1.90982	8.37777	4.38669	2.13313	2	0.55192	1	0.258123
																											ENSOCUG00000001551	3454.49	3580.91	3328.07	0.929393	-0.105639	11.7533	0.838135	1	0.0766863
																											ENSOCUG00000001552	41.9986	41.0611	42.9361	1.04566	0.0644193	5.39191	0.975766	1	0.0106542
																											ENSOCUG00000001553	390.079	433.528	346.63	0.799556	-0.322729	8.59862	0.58042	1	0.236258
																											ENSOCUG00000001554	307.392	367.64	247.144	0.672246	-0.57294	8.23568	0.340534	1	0.467839
																											ENSOCUG00000001555	146.509	121.273	171.744	1.41617	0.501999	7.17312	0.468822	1	0.328992
																											ENSOCUG00000001560	680.407	785.889	574.924	0.731559	-0.450954	9.39271	0.41353	1	0.383493
																											ENSOCUG00000001561	18.8659	10.504	27.2277	2.59213	1.37414	4.07994	0.366444	1	0.435992
																											ENSOCUG00000001565	970.138	901.433	1038.84	1.15243	0.204685	9.91842	0.704554	1	0.152086
																											ENSOCUG00000001568	1612.33	1632.89	1591.78	0.97482	-0.036793	10.6548	0.945436	1	0.0243678
																											ENSOCUG00000001570	531.79	372.414	691.166	1.85591	0.892124	8.98683	0.114305	1	0.941936
																											ENSOCUG00000001571	915.409	972.097	858.721	0.88337	-0.17891	9.8355	0.741523	1	0.129875
																											ENSOCUG00000001573	86.7536	79.2574	94.2499	1.18916	0.249946	6.43345	0.763503	1	0.117189
																											ENSOCUG00000001574	289.925	306.526	273.325	0.891687	-0.165391	8.17717	0.788856	1	0.103002
																											ENSOCUG00000001575	155.518	129.868	181.169	1.39503	0.480297	7.26105	0.482306	1	0.316677
																											ENSOCUG00000001576	394.068	426.844	361.291	0.846425	-0.240546	8.61729	0.680976	1	0.166868
																											ENSOCUG00000001578	1924.59	2040.64	1808.55	0.886267	-0.174187	10.9077	0.73955	1	0.131032
																											ENSOCUG00000001581	155.319	155.65	154.989	0.995751	-0.00614276	7.27909	1	1	0
																											ENSOCUG00000001582	31.2797	35.3316	27.2277	0.770634	-0.375882	4.95495	0.768206	1	0.114522
																											ENSOCUG00000001583	373.986	430.664	317.308	0.736788	-0.440678	8.53008	0.451816	1	0.345039
																											ENSOCUG00000001585	627.437	603.502	651.371	1.07932	0.110122	9.29228	0.844844	1	0.0732235
																											ENSOCUG00000001586	192.313	191.937	192.689	1.00392	0.0056423	7.58731	1	1	0
																											ENSOCUG00000001587	72.2469	86.8966	57.5972	0.662824	-0.593303	6.14458	0.486675	1	0.312761
																											ENSOCUG00000001588	141.597	147.056	136.139	0.925762	-0.111287	7.14458	0.88237	1	0.0543494
																											ENSOCUG00000001590	495.511	462.176	528.847	1.14425	0.194408	8.9495	0.733463	1	0.134622
																											ENSOCUG00000001591	522.963	641.698	404.227	0.629934	-0.666728	8.99239	0.237617	1	0.624123
																											ENSOCUG00000001592	445.641	378.144	513.138	1.35699	0.440413	8.783	0.442478	1	0.354108
																											ENSOCUG00000001594	223.96	187.162	260.758	1.39322	0.478424	7.78736	0.450054	1	0.346735
																											ENSOCUG00000001595	388.617	442.123	335.111	0.757959	-0.399808	8.5884	0.492983	1	0.307168
																											ENSOCUG00000001596	1.00106	0.954908	1.04722	1.09667	0.133132	-1.1212e-15	1	1	0
																											ENSOCUG00000001598	2668.03	3049.98	2286.08	0.749541	-0.41592	11.3666	0.422905	1	0.373757
																											ENSOCUG00000001599	113.399	134.642	92.1555	0.684448	-0.546988	6.79949	0.460316	1	0.336944
																											ENSOCUG00000001601	26.2744	30.5571	21.9916	0.719691	-0.474551	4.69616	0.728161	1	0.137772
																											ENSOCUG00000001603	1.00106	0.954908	1.04722	1.09667	0.133132	-1.1212e-15	1	1	0
																											ENSOCUG00000001604	135.575	130.822	140.328	1.07266	0.101189	7.08206	0.895509	1	0.0479299
																											ENSOCUG00000001605	424.097	390.557	457.636	1.17175	0.228664	8.72372	0.693364	1	0.159039
																											ENSOCUG00000001606	26306.1	23128.8	29483.5	1.27475	0.350214	14.6725	0.490941	1	0.308971
																											ENSOCUG00000001607	2.43343	3.81963	1.04722	0.274168	-1.86687	1	0.816043	1	0.088287
																											ENSOCUG00000001610	33.1274	29.6022	36.6527	1.23818	0.308219	5.04174	0.807948	1	0.0926167
																											ENSOCUG00000001613	90.142	84.9868	95.2971	1.12132	0.165193	6.49176	0.845684	1	0.0727919
																											ENSOCUG00000001616	873.523	1037.03	710.016	0.684663	-0.546535	9.74497	0.313474	1	0.503799
																											ENSOCUG00000001617	3.48065	3.81963	3.14166	0.822504	-0.281905	1.79248	1	1	0
																											ENSOCUG00000001618	168.058	206.26	129.855	0.629571	-0.667559	7.35454	0.31941	1	0.495652
																											ENSOCUG00000001620	2465.87	2671.83	2259.9	0.845825	-0.241569	11.2628	0.642163	1	0.192355
																											ENSOCUG00000001622	105.591	133.687	77.4944	0.579669	-0.786698	6.66937	0.296436	1	0.528069
																											ENSOCUG00000001628	1098.47	1182.18	1014.76	0.858381	-0.220311	10.0971	0.680999	1	0.166853
																											ENSOCUG00000001629	368.888	427.799	309.977	0.724587	-0.46477	8.5084	0.428183	1	0.368371
																											ENSOCUG00000001631	3.48065	3.81963	3.14166	0.822504	-0.281905	1.79248	1	1	0
																											ENSOCUG00000001633	603.566	588.223	618.908	1.05216	0.0733598	9.2369	0.897807	1	0.0468171
																											ENSOCUG00000001636	120.266	111.724	128.808	1.15291	0.205282	6.90644	0.785401	1	0.104909
																											ENSOCUG00000001638	2.00213	1.90982	2.09444	1.09667	0.133132	1	1	1	0
																											ENSOCUG00000001641	1.52468	0.954908	2.09444	2.19334	1.13313	0.5	0.983403	1	0.00726868
																											ENSOCUG00000001645	1390.04	1541.22	1238.86	0.803818	-0.315058	10.4323	0.55177	1	0.258242
																											ENSOCUG00000001646	800.419	729.55	871.288	1.19428	0.256143	9.63893	0.63888	1	0.194581
																											ENSOCUG00000001651	228.028	232.998	223.058	0.957341	-0.0628957	7.83272	0.927523	1	0.0326751
																											ENSOCUG00000001652	140.798	185.252	96.3443	0.520071	-0.943219	7.06174	0.177359	1	0.751146
																											ENSOCUG00000001655	7.77774	12.4138	3.14166	0.253078	-1.98235	2.6427	0.454465	1	0.342499
																											ENSOCUG00000001656	276.787	275.014	278.561	1.0129	0.0184895	8.1126	0.98242	1	0.00770289
																											ENSOCUG00000001657	183.78	184.297	183.264	0.994392	-0.00811389	7.52183	0.999731	1	0.000116667
																											ENSOCUG00000001660	44.2935	47.7454	40.8416	0.855404	-0.225322	5.46463	0.842933	1	0.0742068
																											ENSOCUG00000001661	4215.73	4687.64	3743.82	0.798656	-0.324354	12.0325	0.528482	1	0.27697
																											ENSOCUG00000001665	52.5025	62.069	42.9361	0.691747	-0.531684	5.68996	0.582443	1	0.234747
																											ENSOCUG00000001667	5737.6	6339.64	5135.57	0.810074	-0.303875	12.4782	0.5533	1	0.257039
																											ENSOCUG00000001669	88.4645	108.86	68.0694	0.625295	-0.67739	6.42763	0.394381	1	0.404084
																											ENSOCUG00000001670	389.026	303.661	474.391	1.56224	0.643616	8.56813	0.269126	1	0.570044
																											ENSOCUG00000001671	143.243	102.175	184.311	1.80387	0.851097	7.10045	0.220672	1	0.656254
																											ENSOCUG00000001672	130.816	131.777	129.855	0.985415	-0.0211961	7.03136	0.988405	1	0.00506509
																											ENSOCUG00000001673	280.556	186.207	374.905	2.01338	1.00962	8.04557	0.0986394	1	1.00595
																											ENSOCUG00000001674	13.5995	21.9629	5.23611	0.238407	-2.0685	3.42275	0.266621	1	0.574105
																											ENSOCUG00000001675	289.403	338.992	239.814	0.707431	-0.499339	8.15544	0.410544	1	0.38664
																											ENSOCUG00000001676	127.905	127.003	128.808	1.01422	0.0203641	6.9989	0.989634	1	0.00452556
																											ENSOCUG00000001677	177.018	150.875	203.161	1.34655	0.429264	7.45185	0.518549	1	0.28521
																											ENSOCUG00000001678	3110.2	2893.37	3327.02	1.14988	0.201479	11.5993	0.69689	1	0.156836
																											ENSOCUG00000001680	11.8282	15.2785	8.37777	0.548336	-0.866868	3.5	0.677521	1	0.169078
																											ENSOCUG00000001681	22.2701	26.7374	17.8028	0.665837	-0.58676	4.44741	0.688654	1	0.161999
																											ENSOCUG00000001682	50.4845	49.6552	51.3138	1.0334	0.0474022	5.65757	0.983757	1	0.00711196
																											ENSOCUG00000001683	267.362	275.014	259.711	0.944356	-0.0825967	8.06206	0.898655	1	0.0464068
																											ENSOCUG00000001684	444.293	525.2	363.386	0.6919	-0.531364	8.77104	0.35432	1	0.450604
																											ENSOCUG00000001685	271.631	327.534	215.728	0.658643	-0.602432	8.05428	0.32536	1	0.487635
																											ENSOCUG00000001686	111.443	131.777	91.1082	0.69138	-0.532449	6.77573	0.474698	1	0.323583
																											ENSOCUG00000001687	125.147	97.4006	152.894	1.56975	0.650531	6.93112	0.365611	1	0.436981
																											ENSOCUG00000001688	33.0972	41.0611	25.1333	0.612096	-0.70817	5.00561	0.545536	1	0.263177
																											ENSOCUG00000001691	844.208	852.733	835.682	0.980005	-0.0291394	9.72138	0.959506	1	0.0179521
																											ENSOCUG00000001692	1075.02	974.006	1176.03	1.20741	0.271921	10.0637	0.611898	1	0.213321
																											ENSOCUG00000001693	594.71	587.269	602.152	1.02534	0.0361076	9.21593	0.951448	1	0.021615
																											ENSOCUG00000001696	279.084	314.165	244.003	0.77667	-0.364626	8.11306	0.551146	1	0.258733
																											ENSOCUG00000001697	297.644	374.324	220.964	0.5903	-0.760479	8.1679	0.208338	1	0.681231
																											ENSOCUG00000001698	164.514	160.425	168.603	1.05098	0.0717315	7.36162	0.924075	1	0.0342926
																											ENSOCUG00000001699	454.638	441.168	468.108	1.06107	0.085514	8.82794	0.884515	1	0.0532948
																											ENSOCUG00000001701	22.3465	14.3236	30.3694	2.12023	1.08422	4.38244	0.437554	1	0.358969
																											ENSOCUG00000001703	2.04829	0.954908	3.14166	3.29002	1.71809	0.792481	0.868495	1	0.0612326
																											ENSOCUG00000001710	415.766	422.069	409.463	0.970133	-0.0437457	8.69946	0.943929	1	0.0250607
																											ENSOCUG00000001711	943.149	1058.99	827.305	0.781218	-0.356203	9.87038	0.509175	1	0.293133
																											ENSOCUG00000001712	93.6529	77.3476	109.958	1.42161	0.507528	6.52705	0.517613	1	0.285995
																											ENSOCUG00000001715	1.95597	2.86472	1.04722	0.365557	-1.45183	0.792481	0.912276	1	0.0398736
																											ENSOCUG00000001717	14.4924	14.3236	14.6611	1.02356	0.0335964	3.85712	1	1	0
																											ENSOCUG00000001718	1197.21	1132.52	1261.9	1.11424	0.156061	10.2234	0.770312	1	0.113333
																											ENSOCUG00000001719	35.0532	43.9258	26.1805	0.596017	-0.746574	5.08371	0.511628	1	0.291046
																											ENSOCUG00000001724	606.573	688.489	524.658	0.762043	-0.392057	9.23126	0.481357	1	0.317533
																											ENSOCUG00000001725	5996.71	6287.12	5706.31	0.907619	-0.139841	12.5483	0.784953	1	0.105156
																											ENSOCUG00000001726	152.641	178.568	126.714	0.709611	-0.494899	7.23288	0.471244	1	0.326754
																											ENSOCUG00000001727	92.9288	70.6632	115.194	1.63019	0.705038	6.49541	0.367157	1	0.435148
																											ENSOCUG00000001729	1061.95	1179.31	944.593	0.80097	-0.32018	10.0436	0.550383	1	0.259335
																											ENSOCUG00000001730	588.365	577.719	599.01	1.03685	0.052212	9.20033	0.928391	1	0.0322693
																											ENSOCUG00000001732	35.8075	39.1512	32.4639	0.829191	-0.270224	5.15587	0.827845	1	0.082051
																											ENSOCUG00000001734	403.278	442.123	364.433	0.82428	-0.278793	8.64891	0.632086	1	0.199224
																											ENSOCUG00000001735	6110.06	5415.28	6804.84	1.2566	0.329525	12.5676	0.520051	1	0.283954
																											ENSOCUG00000001736	192.882	190.982	194.783	1.0199	0.0284347	7.59151	0.973887	1	0.0114914
																											ENSOCUG00000001738	52.4564	63.0239	41.8888	0.66465	-0.589334	5.68316	0.540625	1	0.267104
																											ENSOCUG00000001741	414.105	456.446	371.763	0.814474	-0.29606	8.68627	0.609753	1	0.214846
																											ENSOCUG00000001742	18.7433	23.8727	13.6139	0.570269	-0.810284	4.17215	0.605457	1	0.217917
																											ENSOCUG00000001748	15.6478	22.9178	8.37777	0.365557	-1.45183	3.79248	0.392095	1	0.406609
																											ENSOCUG00000001750	179.036	163.289	194.783	1.19287	0.254438	7.47851	0.704613	1	0.15205
																											ENSOCUG00000001751	259.123	272.149	246.097	0.904273	-0.145169	8.01567	0.818713	1	0.0868681
																											ENSOCUG00000001752	632.464	748.648	516.28	0.689616	-0.536134	9.28008	0.333837	1	0.476465
																											ENSOCUG00000001753	573.963	529.019	618.908	1.16992	0.226404	9.16038	0.686735	1	0.163211
																											ENSOCUG00000001754	736.025	956.818	515.233	0.538486	-0.89302	9.45559	0.104762	1	0.979797
																											ENSOCUG00000001757	134.017	76.3927	191.641	2.50864	1.3269	6.91881	0.0622116	1	1.20613
																											ENSOCUG00000001758	317.941	355.226	280.655	0.790075	-0.339938	8.30262	0.571033	1	0.243339
																											ENSOCUG00000001759	159.414	125.093	193.736	1.54874	0.63109	7.2824	0.35189	1	0.453594
																											ENSOCUG00000001761	22.8096	37.2414	8.37777	0.224958	-2.15227	4.1427	0.128692	1	0.89045
																											ENSOCUG00000001764	109.794	111.724	107.864	0.965446	-0.0507322	6.77843	0.958806	1	0.0182695
																											ENSOCUG00000001767	140.735	143.236	138.233	0.965071	-0.0512925	7.13661	0.952199	1	0.0212722
																											ENSOCUG00000001768	382.701	402.016	363.386	0.903908	-0.145753	8.57823	0.805923	1	0.0937066
																											ENSOCUG00000001772	1114.29	941.54	1287.03	1.36695	0.450957	10.1044	0.398963	1	0.399068
																											ENSOCUG00000001776	359.646	391.512	327.78	0.837215	-0.256329	8.48475	0.664869	1	0.177264
																											ENSOCUG00000001777	80.1934	84.9868	75.3999	0.887195	-0.172676	6.32283	0.845614	1	0.0728278
																											ENSOCUG00000001779	345.46	327.534	363.386	1.10946	0.149859	8.43043	0.803284	1	0.0951311
																											ENSOCUG00000001781	59.2331	74.4828	43.9833	0.590516	-0.759953	5.83886	0.404757	1	0.392805
																											ENSOCUG00000001782	268.917	264.51	273.325	1.03333	0.0472959	8.07082	0.944762	1	0.0246778
																											ENSOCUG00000001783	288.108	300.796	275.419	0.915634	-0.127157	8.16906	0.838548	1	0.076472
																											ENSOCUG00000001784	52.3179	65.8887	38.7472	0.58807	-0.765939	5.65899	0.423409	1	0.37324
																											ENSOCUG00000001785	6.00639	5.72945	6.28333	1.09667	0.133132	2.58496	1	1	0
																											ENSOCUG00000001786	187.969	184.297	191.641	1.03985	0.0563748	7.55408	0.939656	1	0.0270311
																											ENSOCUG00000001787	1906.19	1706.42	2105.96	1.23414	0.303505	10.8885	0.561993	1	0.250269
																											ENSOCUG00000001788	146.461	89.7614	203.161	2.26334	1.17846	7.07725	0.0896582	1	1.04741
																											ENSOCUG00000001789	119.821	131.777	107.864	0.818531	-0.288892	6.89751	0.697207	1	0.156638
																											ENSOCUG00000001790	1059.36	1037.99	1080.73	1.04118	0.0582231	10.0487	0.915079	1	0.0385415
																											ENSOCUG00000001792	8.96343	9.54908	8.37777	0.877338	-0.188796	3.16096	0.989553	1	0.00456082
																											ENSOCUG00000001798	216.324	236.817	195.83	0.826926	-0.27417	7.75055	0.670072	1	0.173878
																											ENSOCUG00000001799	1795.02	2099.84	1490.2	0.70967	-0.49478	10.7887	0.345722	1	0.461274
																											ENSOCUG00000001801	8.96343	9.54908	8.37777	0.877338	-0.188796	3.16096	0.989553	1	0.00456082
																											ENSOCUG00000001802	1045.4	1153.53	937.263	0.812518	-0.299529	10.0221	0.576771	1	0.238996
																											ENSOCUG00000001803	16.9417	28.6472	5.23611	0.182779	-2.45183	3.61441	0.143753	1	0.842382
																											ENSOCUG00000001804	46.3418	48.7003	43.9833	0.903142	-0.146976	5.53237	0.903589	1	0.0440291
																											ENSOCUG00000001806	29.1232	25.7825	32.4639	1.25914	0.332441	4.85454	0.805545	1	0.0939103
																											ENSOCUG00000001807	178.329	199.576	157.083	0.787085	-0.345408	7.46809	0.604507	1	0.218599
																											ENSOCUG00000001808	321.962	402.016	241.908	0.601737	-0.732795	8.28471	0.220068	1	0.657443
																											ENSOCUG00000001810	1145.52	1227.06	1063.98	0.867096	-0.205736	10.1581	0.700524	1	0.154577
																											ENSOCUG00000001812	20.3603	22.9178	17.8028	0.776809	-0.364368	4.33621	0.828195	1	0.0818672
																											ENSOCUG00000001814	179.7	192.891	166.508	0.863222	-0.212196	7.48555	0.753329	1	0.123015
																											ENSOCUG00000001816	136.516	154.695	118.336	0.764963	-0.386539	7.08001	0.585898	1	0.232178
																											ENSOCUG00000001817	108.085	114.589	101.58	0.886476	-0.173846	6.7534	0.826002	1	0.0830188
																											ENSOCUG00000001818	65.5928	62.069	69.1166	1.11354	0.155158	6.03338	0.874785	1	0.0580987
																											ENSOCUG00000001819	32.6961	27.6923	37.7	1.36139	0.445076	5.01395	0.714651	1	0.145906
																											ENSOCUG00000001820	781.38	635.969	926.791	1.45729	0.543287	9.58446	0.319707	1	0.495248
																											ENSOCUG00000001821	66.578	52.52	80.636	1.53534	0.618559	6.02407	0.480042	1	0.318721
																											ENSOCUG00000001823	62.3429	53.4749	71.211	1.33167	0.41324	5.94741	0.650576	1	0.186702
																											ENSOCUG00000001824	5.82176	9.54908	2.09444	0.219334	-2.1888	2.16096	0.506923	1	0.295058
																											ENSOCUG00000001825	63.3296	76.3927	50.2666	0.658003	-0.603834	5.95345	0.499515	1	0.301452
																											ENSOCUG00000001826	15.2165	21.008	9.42499	0.448639	-1.15637	3.81468	0.504497	1	0.297142
																											ENSOCUG00000001827	379.343	384.828	373.858	0.971494	-0.0417237	8.56721	0.947748	1	0.0233072
																											ENSOCUG00000001828	961.245	1063.77	858.721	0.807245	-0.308921	9.90051	0.566678	1	0.246663
																											ENSOCUG00000001829	1839.53	1883.08	1795.98	0.953749	-0.0683189	10.8447	0.897117	1	0.0471507
																											ENSOCUG00000001830	66.1641	93.581	38.7472	0.41405	-1.27212	5.91208	0.147258	1	0.831921
																											ENSOCUG00000001832	734.038	618.781	849.296	1.37253	0.45684	9.5017	0.404685	1	0.392883
																											ENSOCUG00000001833	8.10083	5.72945	10.4722	1.82779	0.870098	2.95345	0.751769	1	0.123915
																											ENSOCUG00000001834	97.7812	100.265	95.2971	0.950449	-0.0733188	6.61102	0.937791	1	0.0278939
																											ENSOCUG00000001836	177.235	168.064	186.405	1.10913	0.149434	7.46758	0.828143	1	0.0818947
																											ENSOCUG00000001837	606.492	603.502	609.483	1.00991	0.0142266	9.24433	0.98288	1	0.0074996
																											ENSOCUG00000001838	253.548	268.329	238.766	0.889826	-0.168404	7.98366	0.790066	1	0.102336
																											ENSOCUG00000001839	117.341	128.913	105.769	0.820473	-0.285472	6.86751	0.702513	1	0.153346
																											ENSOCUG00000001842	1076.65	1297.72	855.58	0.659294	-0.601005	10.0413	0.262296	1	0.581209
																											ENSOCUG00000001843	67.8257	59.2043	76.4471	1.29124	0.36876	6.07201	0.678115	1	0.168697
																											ENSOCUG00000001844	1220.73	1165.94	1275.52	1.09398	0.129583	10.2521	0.808537	1	0.0922999
																											ENSOCUG00000001847	2318.63	2132.31	2504.95	1.17476	0.232366	11.1744	0.655373	1	0.183511
																											ENSOCUG00000001851	653.342	641.698	664.985	1.03629	0.0514274	9.35147	0.928586	1	0.032178
																											ENSOCUG00000001853	22.7475	27.6923	17.8028	0.642877	-0.637386	4.47272	0.656773	1	0.182584
																											ENSOCUG00000001855	19.8367	22.9178	16.7555	0.731115	-0.45183	4.29248	0.782115	1	0.106729
																											ENSOCUG00000001856	92.6995	107.905	77.4944	0.718175	-0.477594	6.51482	0.545039	1	0.263572
																											ENSOCUG00000001857	34.2829	38.1963	30.3694	0.795087	-0.330815	5.08995	0.788579	1	0.103155
																											ENSOCUG00000001858	6.39153	8.59417	4.18888	0.48741	-1.03679	2.58496	0.751193	1	0.124249
																											ENSOCUG00000001859	104.865	94.5359	115.194	1.21852	0.285135	6.70536	0.712225	1	0.147383
																											ENSOCUG00000001861	150.437	137.507	163.366	1.18806	0.248609	7.22766	0.722816	1	0.140972
																											ENSOCUG00000001863	14.1995	9.54908	18.85	1.97401	0.981129	3.74593	0.588819	1	0.230018
																											ENSOCUG00000001867	12.0589	10.504	13.6139	1.29607	0.37414	3.57994	0.883684	1	0.053703
																											ENSOCUG00000001868	221.191	244.457	197.925	0.809652	-0.304626	7.78112	0.633698	1	0.198118
																											ENSOCUG00000001870	93.0052	58.2494	127.761	2.19334	1.13313	6.43074	0.147638	1	0.8308
																											ENSOCUG00000001873	329.874	314.165	345.583	1.10001	0.13751	8.36413	0.820951	1	0.085683
																											ENSOCUG00000001874	29.8012	33.4218	26.1805	0.783337	-0.352295	4.88657	0.790092	1	0.102322
																											ENSOCUG00000001875	53.5036	63.0239	43.9833	0.697882	-0.518945	5.71836	0.589044	1	0.229852
																											ENSOCUG00000001877	1049.3	1094.32	1004.28	0.917721	-0.123872	10.0339	0.81847	1	0.0869972
																											ENSOCUG00000001879	300.472	261.645	339.3	1.29679	0.37495	8.21894	0.53491	1	0.271719
																											ENSOCUG00000001880	305.049	329.443	280.655	0.851907	-0.231231	8.24827	0.70341	1	0.152791
																											ENSOCUG00000001881	103.695	107.905	99.486	0.921981	-0.117191	6.69502	0.888728	1	0.0512313
																											ENSOCUG00000001882	29.9396	30.5571	29.3222	0.959588	-0.059513	4.90368	0.992231	1	0.00338702
																											ENSOCUG00000001883	17.0181	16.2334	17.8028	1.09667	0.133132	4.08746	0.973606	1	0.011617
																											ENSOCUG00000001884	297.378	293.157	301.6	1.0288	0.0409622	8.21601	0.951719	1	0.0214912
																											ENSOCUG00000001885	443.962	369.549	518.374	1.40272	0.488227	8.77374	0.394629	1	0.403811
																											ENSOCUG00000001886	884.679	827.905	941.452	1.13715	0.185421	9.78603	0.732911	1	0.134949
																											ENSOCUG00000001887	211.473	239.682	183.264	0.764612	-0.3872	7.71138	0.546606	1	0.262326
																											ENSOCUG00000001888	428.519	450.717	406.322	0.901502	-0.149598	8.74128	0.79777	1	0.0981225
																											ENSOCUG00000001889	2072.57	1839.15	2305.98	1.25383	0.326339	11.008	0.531928	1	0.274147
																											ENSOCUG00000001890	656.368	470.77	841.966	1.78849	0.83874	9.29825	0.130396	1	0.884735
																											ENSOCUG00000001892	284.35	302.706	265.994	0.878721	-0.186522	8.14851	0.76262	1	0.117692
																											ENSOCUG00000001894	187.338	175.703	198.972	1.13243	0.179426	7.54671	0.789719	1	0.102528
																											ENSOCUG00000001897	574.688	535.704	613.672	1.14554	0.196032	9.16331	0.727335	1	0.138266
																											ENSOCUG00000001898	3.57296	1.90982	5.23611	2.74168	1.45506	1.66096	0.782367	1	0.106589
																											ENSOCUG00000001902	122.084	117.454	126.714	1.07884	0.109481	6.93069	0.890125	1	0.050549
																											ENSOCUG00000001903	15.1703	21.9629	8.37777	0.381451	-1.39043	3.76178	0.420793	1	0.375931
																											ENSOCUG00000001906	23.3173	26.7374	19.8972	0.74417	-0.426295	4.52764	0.774522	1	0.110966
																											ENSOCUG00000001907	294.542	243.502	345.583	1.41922	0.505101	8.18034	0.403635	1	0.394012
																											ENSOCUG00000001908	234.602	205.305	263.9	1.2854	0.362219	7.86274	0.565331	1	0.247697
																											ENSOCUG00000001909	1.00106	0.954908	1.04722	1.09667	0.133132	-1.1212e-15	1	1	0
																											ENSOCUG00000001910	41.8298	55.3847	28.275	0.51052	-0.969961	5.30643	0.353302	1	0.451854
																											ENSOCUG00000001911	659.071	653.157	664.985	1.01811	0.0258923	9.36423	0.965545	1	0.0152275
																											ENSOCUG00000001912	998.195	851.778	1144.61	1.34379	0.42631	9.94749	0.427869	1	0.36869
																											ENSOCUG00000001913	22.6393	19.0982	26.1805	1.37084	0.45506	4.48289	0.760761	1	0.118752
																											ENSOCUG00000001914	402.256	333.263	471.249	1.41405	0.49983	8.63043	0.388823	1	0.410248
																											ENSOCUG00000001915	1276.28	1262.39	1290.18	1.02201	0.0314121	10.3176	0.954327	1	0.020303
																											ENSOCUG00000001918	16.1555	12.4138	19.8972	1.60283	0.68062	3.97418	0.69588	1	0.157465
																											ENSOCUG00000001919	464.752	361.91	567.594	1.56833	0.649227	8.8241	0.255479	1	0.592645
																											ENSOCUG00000001920	248.977	330.398	167.555	0.507132	-0.979568	7.87828	0.116057	1	0.935329
																											ENSOCUG00000001921	28.9386	29.6022	28.275	0.955166	-0.0661768	4.85454	0.988887	1	0.00485339
																											ENSOCUG00000001924	80.639	64.9338	96.3443	1.48373	0.569231	6.30551	0.488093	1	0.311497
																											ENSOCUG00000001925	52.0856	38.1963	65.9749	1.72726	0.788484	5.6496	0.40943	1	0.38782
																											ENSOCUG00000001931	115.447	135.597	95.2971	0.702797	-0.50882	6.82877	0.490563	1	0.309305
																											ENSOCUG00000001937	802.185	952.998	651.371	0.683497	-0.548993	9.62183	0.313936	1	0.503159
																											ENSOCUG00000001938	1621.48	1508.75	1734.2	1.14942	0.20091	10.6596	0.702882	1	0.153118
																											ENSOCUG00000001940	132.172	147.056	117.289	0.79758	-0.3263	7.03707	0.64997	1	0.187107
																											ENSOCUG00000001941	12.7831	17.1883	8.37777	0.48741	-1.03679	3.58496	0.593401	1	0.226652
																											ENSOCUG00000001943	221.097	213.899	228.294	1.0673	0.0939614	7.78777	0.888678	1	0.0512556
																											ENSOCUG00000001946	3.09551	0.954908	5.23611	5.48336	2.45506	1.16096	0.668395	1	0.174967
																											ENSOCUG00000001949	213.427	210.08	216.775	1.03187	0.0452593	7.73742	0.951151	1	0.0217504
																											ENSOCUG00000001951	48.0511	45.8356	50.2666	1.09667	0.133132	5.58496	0.912773	1	0.0396373
																											ENSOCUG00000001952	39.581	47.7454	31.4166	0.658003	-0.603834	5.27537	0.578337	1	0.237819
																											ENSOCUG00000001953	74.0485	82.1221	65.9749	0.803376	-0.315853	6.20177	0.716083	1	0.145037
																											ENSOCUG00000001956	99.9824	76.3927	123.572	1.61759	0.693847	6.60229	0.364375	1	0.438451
																											ENSOCUG00000001957	200.197	180.478	219.916	1.21852	0.285135	7.63824	0.662284	1	0.178956
																											ENSOCUG00000001961	23.7025	29.6022	17.8028	0.601401	-0.733601	4.52083	0.596525	1	0.224371
																											ENSOCUG00000001962	15.678	11.4589	19.8972	1.7364	0.796097	3.91645	0.647512	1	0.188752
																											ENSOCUG00000001963	1603.57	1846.79	1360.34	0.736596	-0.441054	10.6303	0.402251	1	0.395503
																											ENSOCUG00000001964	214.522	241.592	187.453	0.775906	-0.366046	7.7334	0.567974	1	0.245672
																											ENSOCUG00000001965	1.52468	0.954908	2.09444	2.19334	1.13313	0.5	0.983403	1	0.00726868
																											ENSOCUG00000001966	77.4974	64.9338	90.061	1.38697	0.471934	6.25686	0.572763	1	0.242025
																											ENSOCUG00000001968	96.9171	63.9789	129.855	2.02966	1.02124	6.51014	0.185885	1	0.730756
																											ENSOCUG00000001970	7.48491	7.63927	7.33055	0.959588	-0.059513	2.90368	1	1	0
																											ENSOCUG00000001971	145.511	185.252	105.769	0.570948	-0.808569	7.12906	0.243296	1	0.613865
																											ENSOCUG00000001972	555.285	579.629	530.941	0.916001	-0.126579	9.1157	0.823759	1	0.0841999
																											ENSOCUG00000001973	3.91195	5.72945	2.09444	0.365557	-1.45183	1.79248	0.765286	1	0.116176
																											ENSOCUG00000001975	48.0049	46.7905	49.2194	1.05191	0.073011	5.58465	0.963607	1	0.0161001
																											ENSOCUG00000001979	115.754	118.409	113.1	0.955166	-0.0661768	6.85454	0.940328	1	0.0267207
																											ENSOCUG00000001981	142.229	155.65	128.808	0.82755	-0.273082	7.14562	0.700248	1	0.154748
																											ENSOCUG00000001982	1134.62	1290.08	979.152	0.758985	-0.397857	10.1343	0.456422	1	0.340633
																											ENSOCUG00000001984	203.388	244.457	162.319	0.664001	-0.590744	7.63806	0.359507	1	0.444292
																											ENSOCUG00000001985	21.1608	17.1883	25.1333	1.46223	0.54817	4.37744	0.717686	1	0.144066
																											ENSOCUG00000001986	12.4743	1.90982	23.0389	12.0634	3.59256	2.72972	0.0924646	1	1.03402
																											ENSOCUG00000001987	29.3396	42.9709	15.7083	0.365557	-1.45183	4.69937	0.23661	1	0.625967
																											ENSOCUG00000001988	9.91833	11.4589	8.37777	0.731115	-0.45183	3.29248	0.874952	1	0.0580159
																											ENSOCUG00000001990	207.344	216.764	197.925	0.913088	-0.131174	7.6944	0.844236	1	0.0735362
																											ENSOCUG00000001991	3.38834	5.72945	1.04722	0.182779	-2.45183	1.29248	0.646478	1	0.189446
																											ENSOCUG00000001992	322.271	417.295	227.247	0.544572	-0.876806	8.26652	0.142859	1	0.845093
																											ENSOCUG00000001993	11.3507	14.3236	8.37777	0.584892	-0.773759	3.45345	0.723118	1	0.140791
																											ENSOCUG00000001994	27.9375	28.6472	27.2277	0.950449	-0.0733188	4.80367	0.985405	1	0.0063854
																											ENSOCUG00000001996	306.896	291.247	322.544	1.10746	0.147253	8.25973	0.810329	1	0.0913384
																											ENSOCUG00000001998	442.965	465.995	419.936	0.901159	-0.150147	8.7891	0.796188	1	0.0989842
																											ENSOCUG00000001999	531.051	701.858	360.244	0.513272	-0.962204	8.97393	0.0890893	1	1.05017
																											ENSOCUG00000002000	126.691	173.793	79.5888	0.457951	-1.12674	6.87786	0.117469	1	0.930075
																											ENSOCUG00000002001	852.17	861.327	843.013	0.978737	-0.0310066	9.73491	0.956703	1	0.0192228
																											ENSOCUG00000002003	239.517	244.457	234.578	0.959588	-0.059513	7.90368	0.930899	1	0.0310976
																											ENSOCUG00000002004	923.2	930.081	916.318	0.985203	-0.0215067	9.85046	0.970406	1	0.0130463
																											ENSOCUG00000002006	913.992	979.736	848.249	0.865794	-0.207905	9.8323	0.70121	1	0.154152
																											ENSOCUG00000002007	316.691	316.075	317.308	1.0039	0.00561861	8.30693	0.998563	1	0.000624551
																											ENSOCUG00000002008	270.486	232.043	308.93	1.33135	0.412891	8.06469	0.501128	1	0.300051
																											ENSOCUG00000002009	139.134	154.695	123.572	0.79881	-0.324075	7.11125	0.64779	1	0.188566
																											ENSOCUG00000002011	10.103	7.63927	12.5667	1.64501	0.718095	3.29248	0.765192	1	0.11623
																											ENSOCUG00000002013	402.676	422.069	383.283	0.908104	-0.139071	8.6518	0.813577	1	0.0896015
																											ENSOCUG00000002014	406.018	428.754	383.283	0.893946	-0.16174	8.66314	0.782888	1	0.1063
																											ENSOCUG00000002017	350.031	265.464	434.597	1.63712	0.711158	8.40795	0.228394	1	0.641316
																											ENSOCUG00000002018	219.402	194.801	244.003	1.25257	0.324893	7.76831	0.611218	1	0.213804
																											ENSOCUG00000002020	12.4902	12.4138	12.5667	1.01231	0.0176548	3.6427	1	1	0
																											ENSOCUG00000002021	233.541	227.268	239.814	1.0552	0.0775181	7.86701	0.908226	1	0.0418058
																											ENSOCUG00000002022	584.887	638.834	530.941	0.83111	-0.266888	9.18585	0.633497	1	0.198255
																											ENSOCUG00000002023	342.116	288.382	395.85	1.37266	0.45697	8.40032	0.440353	1	0.356199
																											ENSOCUG00000002024	4.09657	1.90982	6.28333	3.29002	1.71809	1.79248	0.698081	1	0.156094
																											ENSOCUG00000002025	467.3	504.192	430.408	0.853659	-0.228268	8.86369	0.690651	1	0.160742
																											ENSOCUG00000002026	33.4362	44.8807	21.9916	0.490002	-1.02914	4.97345	0.37194	1	0.429527
																											ENSOCUG00000002027	760.333	757.242	763.424	1.00816	0.01173	9.57048	0.985555	1	0.00631928
																											ENSOCUG00000002030	6.71462	1.90982	11.5194	6.0317	2.59256	2.22972	0.38258	1	0.417277
																											ENSOCUG00000002031	350.852	367.64	334.064	0.908671	-0.13817	8.45306	0.818422	1	0.0870227
																											ENSOCUG00000002033	56.0294	64.9338	47.1249	0.725739	-0.462478	5.78966	0.625678	1	0.203649
																											ENSOCUG00000002037	360.261	357.136	363.386	1.0175	0.0250294	8.49284	0.971163	1	0.0127077
																											ENSOCUG00000002041	2274.66	2142.81	2406.51	1.12306	0.167438	11.149	0.748069	1	0.126059
																											ENSOCUG00000002042	11.9666	12.4138	11.5194	0.927953	-0.107876	3.57994	1	1	0
																											ENSOCUG00000002043	267.315	243.502	291.127	1.19559	0.25772	8.05665	0.677235	1	0.169261
																											ENSOCUG00000002047	5.71356	0.954908	10.4722	10.9667	3.45506	1.66096	0.330226	1	0.481189
																											ENSOCUG00000002050	34.9449	35.3316	34.5583	0.978113	-0.0319272	5.12692	1	1	0
																											ENSOCUG00000002051	6.91514	8.59417	5.23611	0.609262	-0.714865	2.74593	0.833459	1	0.079116
																											ENSOCUG00000002052	542.237	481.274	603.199	1.25334	0.325777	9.0736	0.562684	1	0.249736
																											ENSOCUG00000002053	553.96	552.892	555.027	1.00386	0.00556104	9.11363	0.995754	1	0.00184802
																											ENSOCUG00000002054	42.6765	48.7003	36.6527	0.752618	-0.41001	5.40085	0.703476	1	0.152751
																											ENSOCUG00000002055	319.252	403.926	234.578	0.580744	-0.784027	8.26593	0.190222	1	0.72074
																											ENSOCUG00000002059	280.465	220.584	340.347	1.54294	0.625679	8.09802	0.304313	1	0.51668
																											ENSOCUG00000002060	27.2293	32.4669	21.9916	0.677356	-0.562013	4.73989	0.66898	1	0.174587
																											ENSOCUG00000002063	1798	1929.87	1666.13	0.863337	-0.212003	10.8083	0.686227	1	0.163532
																											ENSOCUG00000002065	623.457	804.988	441.927	0.548986	-0.865158	9.22024	0.12051	1	0.918976
																											ENSOCUG00000002066	87.9091	87.8516	87.9666	1.00131	0.0018875	6.45794	1	1	0
																											ENSOCUG00000002071	1366.36	1305.36	1427.36	1.09346	0.128904	10.4147	0.808485	1	0.0923281
																											ENSOCUG00000002072	333.523	303.661	363.386	1.19668	0.259041	8.37584	0.664745	1	0.177345
																											ENSOCUG00000002073	1194.28	987.375	1401.18	1.4191	0.504974	10.1999	0.34342	1	0.464174
																											ENSOCUG00000002074	8399.25	6867.7	9930.8	1.44602	0.532083	13.0117	0.298388	1	0.525219
																											ENSOCUG00000002075	1106.32	1084.78	1127.86	1.03971	0.0561874	10.1113	0.917852	1	0.0372275
																											ENSOCUG00000002080	156.306	178.568	134.044	0.750663	-0.413762	7.27345	0.545821	1	0.26295
																											ENSOCUG00000002083	23.163	19.0982	27.2277	1.42567	0.511644	4.51118	0.72417	1	0.14016
																											ENSOCUG00000002084	85.7223	89.7614	81.6832	0.910004	-0.136055	6.42	0.87832	1	0.0563471
																											ENSOCUG00000002085	93.5765	89.7614	97.3916	1.08501	0.117702	6.54687	0.892702	1	0.0492933
																											ENSOCUG00000002086	776.755	536.658	1016.85	1.89478	0.922033	9.52888	0.0927853	1	1.03252
																											ENSOCUG00000002089	8.20903	14.3236	2.09444	0.146223	-2.77376	2.45345	0.294055	1	0.531572
																											ENSOCUG00000002090	143.754	156.605	130.903	0.835878	-0.258636	7.16167	0.71518	1	0.145584
																											ENSOCUG00000002093	272.43	289.337	255.522	0.883129	-0.179305	8.08696	0.773465	1	0.111559
																											ENSOCUG00000002094	462.786	478.409	447.163	0.934688	-0.0974425	8.85338	0.867679	1	0.0616411
																											ENSOCUG00000002095	89.3876	89.7614	89.0138	0.991671	-0.0120659	6.48199	1	1	0
																											ENSOCUG00000002098	609.954	531.884	688.024	1.29356	0.371348	9.24064	0.50457	1	0.297079
																											ENSOCUG00000002099	514.146	477.454	550.838	1.1537	0.206267	9.00235	0.71659	1	0.144729
																											ENSOCUG00000002100	503.722	508.966	498.477	0.979392	-0.0300419	8.9764	0.961417	1	0.0170884
																											ENSOCUG00000002102	67.4406	56.3396	78.5416	1.39407	0.479308	6.05573	0.58561	1	0.232391
																											ENSOCUG00000002105	174.679	177.613	171.744	0.966958	-0.0484748	7.44836	0.950934	1	0.0218497
																											ENSOCUG00000002106	165.699	157.56	173.839	1.10332	0.141849	7.37068	0.840078	1	0.0756805
																											ENSOCUG00000002107	1331.87	1477.24	1186.5	0.803186	-0.316193	10.3706	0.551057	1	0.258804
																											ENSOCUG00000002108	89.2953	91.6712	86.9193	0.948164	-0.076791	6.48	0.937225	1	0.0281561
																											ENSOCUG00000002109	35.4224	36.2865	34.5583	0.952373	-0.0704014	5.14616	0.97782	1	0.00974101
																											ENSOCUG00000002110	649.783	617.826	681.741	1.10345	0.142024	9.34207	0.799187	1	0.0973518
																											ENSOCUG00000002112	13.4292	3.81963	23.0389	6.0317	2.59256	3.22972	0.173805	1	0.759939
																											ENSOCUG00000002114	20.4526	21.008	19.8972	0.947126	-0.0783721	4.35368	0.995595	1	0.00191716
																											ENSOCUG00000002115	189.168	127.003	251.333	1.97896	0.98474	7.48109	0.132623	1	0.877382
																											ENSOCUG00000002117	103.404	135.597	71.211	0.525167	-0.929152	6.6186	0.220454	1	0.656682
																											ENSOCUG00000002118	126.904	126.048	127.761	1.01359	0.0194753	6.98757	0.990767	1	0.00402826
																											ENSOCUG00000002119	24.9963	35.3316	14.6611	0.414957	-1.26897	4.5084	0.337258	1	0.472037
																											ENSOCUG00000002120	609.85	620.69	599.01	0.965071	-0.0512925	9.25208	0.929427	1	0.0317848
																											ENSOCUG00000002121	1496.55	1493.48	1499.62	1.00411	0.00592301	10.5474	0.99246	1	0.00328703
																											ENSOCUG00000002122	514.272	529.019	499.524	0.944246	-0.0827647	9.00579	0.886556	1	0.052294
																											ENSOCUG00000002126	253.516	247.321	259.711	1.0501	0.0705201	7.9855	0.915461	1	0.0383601
																											ENSOCUG00000002127	30.6479	26.7374	34.5583	1.29251	0.370171	4.92587	0.77402	1	0.111248
																											ENSOCUG00000002128	1544.44	1185.04	1903.85	1.60657	0.683981	10.5527	0.195395	1	0.709086
																											ENSOCUG00000002129	360.028	329.443	390.613	1.18568	0.245711	8.48674	0.677986	1	0.16878
																											ENSOCUG00000002131	320.939	260.69	381.188	1.46223	0.54817	8.30028	0.358623	1	0.445361
																											ENSOCUG00000002134	1117.33	1192.68	1041.98	0.87365	-0.194873	10.1226	0.716068	1	0.145046
																											ENSOCUG00000002135	486.915	412.52	561.31	1.36069	0.444334	8.91049	0.434099	1	0.362411
																											ENSOCUG00000002137	44.8474	36.2865	53.4083	1.47185	0.55763	5.46018	0.588038	1	0.230595
																											ENSOCUG00000002139	219.31	196.711	241.908	1.22976	0.298381	7.76912	0.641181	1	0.19302
																											ENSOCUG00000002140	6.86898	9.54908	4.18888	0.438669	-1.1888	2.66096	0.691514	1	0.160199
																											ENSOCUG00000002142	6.62231	3.81963	9.42499	2.46751	1.30306	2.58496	0.665561	1	0.176812
																											ENSOCUG00000002143	23.8409	26.7374	20.9444	0.783337	-0.352295	4.56464	0.81662	1	0.0879799
																											ENSOCUG00000002144	78.083	74.4828	81.6832	1.09667	0.133132	6.2854	0.885989	1	0.0525719
																											ENSOCUG00000002145	69.5048	67.7985	71.211	1.05033	0.0708478	6.1186	0.951827	1	0.0214418
																											ENSOCUG00000002147	595.453	669.391	521.516	0.779091	-0.360137	9.20664	0.518558	1	0.285203
																											ENSOCUG00000002148	460.525	525.2	395.85	0.753713	-0.407913	8.83277	0.475571	1	0.322785
																											ENSOCUG00000002149	177.265	156.605	197.925	1.26385	0.337822	7.4599	0.61287	1	0.212631
																											ENSOCUG00000002150	11702.8	11566.8	11838.8	1.02352	0.0335368	13.5145	0.947656	1	0.0233491
																											ENSOCUG00000002151	260.166	174.748	345.583	1.97761	0.983754	7.94101	0.111617	1	0.952271
																											ENSOCUG00000002152	23.4558	23.8727	23.0389	0.965071	-0.0512925	4.55164	1	1	0
																											ENSOCUG00000002153	197.503	192.891	202.114	1.04781	0.0673776	7.62533	0.924907	1	0.0339021
																											ENSOCUG00000002154	146.297	201.486	91.1082	0.452182	-1.14502	7.08202	0.099508	1	1.00214
																											ENSOCUG00000002155	2867.64	2906.74	2828.54	0.973098	-0.0393427	11.4855	0.940095	1	0.0268281
																											ENSOCUG00000002156	178.853	199.576	158.13	0.792332	-0.335822	7.47288	0.614555	1	0.211439
																											ENSOCUG00000002157	1584.07	1795.23	1372.91	0.764754	-0.386933	10.6165	0.462567	1	0.334826
																											ENSOCUG00000002158	289.909	296.022	283.797	0.958704	-0.0608433	8.17914	0.925697	1	0.0335313
																											ENSOCUG00000002159	86.2315	111.724	60.7388	0.543649	-0.879252	6.36417	0.272066	1	0.565325
																											ENSOCUG00000002160	117.309	107.905	126.714	1.17431	0.231816	6.86952	0.758632	1	0.119969
																											ENSOCUG00000002161	2.04829	0.954908	3.14166	3.29002	1.71809	0.792481	0.868495	1	0.0612326
																											ENSOCUG00000002163	470.009	469.815	470.202	1.00082	0.00118916	8.87654	1	1	0
																											ENSOCUG00000002165	891.468	784.935	998.002	1.27145	0.34647	9.78966	0.522168	1	0.282189
																											ENSOCUG00000002166	399.318	404.881	393.755	0.97252	-0.0401996	8.64125	0.949287	1	0.0226024
																											ENSOCUG00000002167	37.0394	35.3316	38.7472	1.09667	0.133132	5.20945	0.927806	1	0.0325427
																											ENSOCUG00000002171	63.2517	56.3396	70.1638	1.24537	0.316578	5.97437	0.731517	1	0.135775
																											ENSOCUG00000002172	397.672	449.762	345.583	0.768369	-0.380129	8.62295	0.513447	1	0.289504
																											ENSOCUG00000002173	17.9269	19.0982	16.7555	0.877338	-0.188796	4.16096	0.939883	1	0.0269264
																											ENSOCUG00000002176	911.389	957.773	865.005	0.903142	-0.146976	9.83005	0.786863	1	0.104101
																											ENSOCUG00000002178	141.984	182.387	101.58	0.556949	-0.844384	7.08867	0.225857	1	0.646167
																											ENSOCUG00000002179	329.872	281.698	378.047	1.34203	0.424416	8.35021	0.476004	1	0.32239
																											ENSOCUG00000002180	932.758	829.815	1035.7	1.24811	0.319746	9.85652	0.553751	1	0.256686
																											ENSOCUG00000002181	700.982	793.529	608.435	0.766747	-0.383178	9.44055	0.486281	1	0.313113
																											ENSOCUG00000002182	157.969	176.658	139.28	0.788418	-0.342967	7.29333	0.617113	1	0.209636
																											ENSOCUG00000002183	411.525	293.157	529.894	1.80754	0.854031	8.62254	0.140715	1	0.851659
																											ENSOCUG00000002186	11.9046	2.86472	20.9444	7.31115	2.8701	2.95345	0.167474	1	0.776053
																											ENSOCUG00000002187	4604.42	5778.15	3430.7	0.593736	-0.752106	12.1203	0.144966	1	0.838734
																											ENSOCUG00000002188	2149.12	2443.61	1854.63	0.758971	-0.397884	11.0559	0.445663	1	0.350994
																											ENSOCUG00000002190	26.3205	29.6022	23.0389	0.778283	-0.361633	4.70681	0.798925	1	0.0974942
																											ENSOCUG00000002193	625.514	654.112	596.916	0.912559	-0.13201	9.28739	0.813999	1	0.0893762
																											ENSOCUG00000002194	598.559	550.982	646.135	1.1727	0.229831	9.22078	0.681033	1	0.166832
																											ENSOCUG00000002197	53.2267	68.7534	37.7	0.548336	-0.866868	5.66993	0.360763	1	0.442778
																											ENSOCUG00000002198	17.8186	10.504	25.1333	2.39274	1.25866	4.0222	0.422981	1	0.373679
																											ENSOCUG00000002200	264.743	242.547	286.939	1.18302	0.242479	8.04336	0.696186	1	0.157274
																											ENSOCUG00000002202	898.877	804.988	992.766	1.23327	0.302486	9.80407	0.576276	1	0.239369
																											ENSOCUG00000002204	6.00639	5.72945	6.28333	1.09667	0.133132	2.58496	1	1	0
																											ENSOCUG00000002205	547.563	446.897	648.23	1.45051	0.536563	9.07208	0.339329	1	0.469379
																											ENSOCUG00000002206	28.5534	26.7374	30.3694	1.13584	0.183758	4.83267	0.908333	1	0.0417551
																											ENSOCUG00000002207	125.426	124.138	126.714	1.02075	0.0296275	6.97062	0.979412	1	0.00903471
																											ENSOCUG00000002208	4.14273	0.954908	7.33055	7.6767	2.94049	1.40368	0.507306	1	0.29473
																											ENSOCUG00000002210	120.436	129.868	111.005	0.854759	-0.22641	6.90769	0.762745	1	0.11762
																											ENSOCUG00000002211	205.109	154.695	255.522	1.65178	0.724019	7.63529	0.260185	1	0.584718
																											ENSOCUG00000002212	290.294	298.886	281.702	0.942507	-0.0854245	8.18074	0.893128	1	0.0490861
																											ENSOCUG00000002214	1122.9	1066.63	1179.17	1.10551	0.14471	10.1312	0.787432	1	0.103787
																											ENSOCUG00000002215	11.5815	9.54908	13.6139	1.42567	0.511644	3.51118	0.82801	1	0.0819643
																											ENSOCUG00000002216	59.1408	76.3927	41.8888	0.548336	-0.866868	5.82193	0.341427	1	0.466702
																											ENSOCUG00000002217	165.007	171.883	158.13	0.919986	-0.120316	7.36513	0.865928	1	0.0625181
																											ENSOCUG00000002218	236.235	214.854	257.616	1.19903	0.261865	7.87815	0.679062	1	0.168091
																											ENSOCUG00000002219	183.332	139.417	227.247	1.62999	0.704859	7.47569	0.283723	1	0.547106
																											ENSOCUG00000002220	336.834	289.337	384.33	1.32831	0.409594	8.38141	0.490387	1	0.309461
																											ENSOCUG00000002222	2.5719	0.954908	4.18888	4.38669	2.13313	1	0.763521	1	0.117179
																											ENSOCUG00000002223	226.349	224.403	228.294	1.01734	0.0247994	7.82235	0.976371	1	0.0103852
																											ENSOCUG00000002224	100.722	93.581	107.864	1.15262	0.204923	6.65061	0.797632	1	0.0981976
																											ENSOCUG00000002225	413.322	505.146	321.497	0.636443	-0.651897	8.65461	0.259862	1	0.585258
																											ENSOCUG00000002226	183.381	203.395	163.366	0.803196	-0.316175	7.51006	0.633994	1	0.197915
																											ENSOCUG00000002230	3888.05	2768.28	5007.81	1.809	0.855191	11.8624	0.0987328	1	1.00554
																											ENSOCUG00000002231	521.823	643.608	400.038	0.621556	-0.686044	8.98702	0.224471	1	0.648841
																											ENSOCUG00000002233	13.399	15.2785	11.5194	0.753962	-0.407436	3.72972	0.856663	1	0.06719
																											ENSOCUG00000002235	511.822	514.696	508.949	0.988836	-0.0161969	8.99948	0.98099	1	0.00833558
																											ENSOCUG00000002236	765.124	777.295	752.952	0.968682	-0.045905	9.57937	0.935445	1	0.0289817
																											ENSOCUG00000002238	899.769	797.348	1002.19	1.2569	0.329875	9.804	0.542108	1	0.265914
																											ENSOCUG00000002240	220.605	234.907	206.303	0.878229	-0.187331	7.78228	0.772531	1	0.112084
																											ENSOCUG00000002241	832.159	722.866	941.452	1.30239	0.38116	9.68816	0.483213	1	0.315861
																											ENSOCUG00000002242	173.186	197.666	148.705	0.752306	-0.410608	7.42162	0.539429	1	0.268066
																											ENSOCUG00000002244	149.835	117.454	182.216	1.55139	0.633561	7.19273	0.356897	1	0.447457
																											ENSOCUG00000002245	154.259	210.08	98.4388	0.468578	-1.09364	7.16797	0.110885	1	0.955126
																											ENSOCUG00000002246	280.975	242.547	319.402	1.31687	0.397113	8.12068	0.515209	1	0.288016
																											ENSOCUG00000002248	1055.83	937.72	1173.93	1.2519	0.324123	10.0351	0.545524	1	0.263186
																											ENSOCUG00000002249	349.432	310.345	388.519	1.25189	0.324112	8.43979	0.584104	1	0.23351
																											ENSOCUG00000002250	99.7357	70.6632	128.808	1.82285	0.866193	6.57598	0.257402	1	0.589389
																											ENSOCUG00000002251	124.765	159.47	90.061	0.564753	-0.824308	6.90498	0.252286	1	0.598108
																											ENSOCUG00000002253	293.899	321.804	265.994	0.826572	-0.274788	8.19264	0.65187	1	0.185839
																											ENSOCUG00000002254	698.913	684.669	713.158	1.04161	0.0588137	9.44867	0.917295	1	0.0374908
																											ENSOCUG00000002256	14.4462	15.2785	13.6139	0.891046	-0.166428	3.85022	0.96687	1	0.0146318
																											ENSOCUG00000002258	18.2197	23.8727	12.5667	0.526403	-0.925762	4.11441	0.55769	1	0.253607
																											ENSOCUG00000002259	2177.82	2348.12	2007.52	0.854949	-0.226089	11.0842	0.664697	1	0.177377
																											ENSOCUG00000002260	259.863	289.337	230.389	0.796263	-0.328682	8.01227	0.595952	1	0.224789
																											ENSOCUG00000002261	2.43343	3.81963	1.04722	0.274168	-1.86687	1	0.816043	1	0.088287
																											ENSOCUG00000002263	877.932	804.988	950.877	1.18123	0.240292	9.77297	0.657905	1	0.181837
																											ENSOCUG00000002264	26.798	30.5571	23.0389	0.753962	-0.407436	4.72972	0.767449	1	0.11495
																											ENSOCUG00000002266	4.00426	3.81963	4.18888	1.09667	0.133132	2	1	1	0
																											ENSOCUG00000002267	237.036	209.125	264.947	1.26693	0.341339	7.87889	0.587583	1	0.230931
																											ENSOCUG00000002269	14.0149	13.3687	14.6611	1.09667	0.133132	3.80735	0.985016	1	0.00655693
																											ENSOCUG00000002271	5623.42	6600.33	4646.52	0.703983	-0.506387	12.4351	0.323925	1	0.489556
																											ENSOCUG00000002272	12.8133	5.72945	19.8972	3.47279	1.7961	3.41645	0.344076	1	0.463346
																											ENSOCUG00000002274	153.425	162.334	144.517	0.89024	-0.167734	7.25896	0.813519	1	0.0896323
																											ENSOCUG00000002278	275.832	273.104	278.561	1.01998	0.0285431	8.10758	0.969154	1	0.0136073
																											ENSOCUG00000002279	123.422	89.7614	157.083	1.75001	0.807362	6.8917	0.262874	1	0.580252
																											ENSOCUG00000002281	15.7401	21.008	10.4722	0.498487	-1.00437	3.89068	0.557231	1	0.253965
																											ENSOCUG00000002283	348.013	253.051	442.975	1.75054	0.807797	8.38718	0.171955	1	0.764584
																											ENSOCUG00000002284	2.91088	4.77454	1.04722	0.219334	-2.1888	1.16096	0.727421	1	0.138214
																											ENSOCUG00000002287	478.883	546.208	411.558	0.753483	-0.408354	8.88913	0.473256	1	0.324904
																											ENSOCUG00000002289	2671.28	2462.71	2879.86	1.16939	0.225752	11.3789	0.663493	1	0.178164
																											ENSOCUG00000002290	697.252	719.046	675.458	0.93938	-0.0902187	9.44483	0.87194	1	0.0595136
																											ENSOCUG00000002292	1421.83	1316.82	1526.85	1.1595	0.2135	10.4696	0.686714	1	0.163224
																											ENSOCUG00000002295	8.00852	7.63927	8.37777	1.09667	0.133132	3	1	1	0
																											ENSOCUG00000002296	405.942	441.168	370.716	0.840307	-0.251011	8.65968	0.66655	1	0.176167
																											ENSOCUG00000002298	330.937	324.669	337.205	1.03861	0.054658	8.37015	0.931818	1	0.0306688
																											ENSOCUG00000002299	670.933	721.911	619.955	0.85877	-0.219657	9.38585	0.691728	1	0.160065
																											ENSOCUG00000002300	303.17	314.165	292.175	0.930004	-0.10469	8.24303	0.866666	1	0.0621482
																											ENSOCUG00000002301	3.9581	4.77454	3.14166	0.658003	-0.603834	1.95345	0.944886	1	0.0246205
																											ENSOCUG00000002302	160.356	181.433	139.28	0.76767	-0.381441	7.31257	0.575922	1	0.239636
																											ENSOCUG00000002303	130.339	130.822	129.855	0.992608	-0.0107037	7.02611	1	1	0
																											ENSOCUG00000002304	1519.18	1285.31	1753.05	1.36391	0.447753	10.5518	0.396017	1	0.402286
																											ENSOCUG00000002305	396.021	364.775	427.266	1.17131	0.228129	8.62493	0.696542	1	0.157053
																											ENSOCUG00000002306	196.086	200.531	191.641	0.955671	-0.0654136	7.61497	0.92759	1	0.0326441
																											ENSOCUG00000002309	322.927	284.563	361.291	1.26964	0.344416	8.32481	0.564866	1	0.248055
																											ENSOCUG00000002310	212.95	209.125	216.775	1.03658	0.0518319	7.73414	0.942867	1	0.0255495
																											ENSOCUG00000002311	122.852	90.7163	154.989	1.7085	0.77273	6.88965	0.284484	1	0.545943
																											ENSOCUG00000002312	719.7	612.096	827.305	1.35159	0.43466	9.47494	0.428549	1	0.368
																											ENSOCUG00000002313	54.2739	68.7534	39.7944	0.578799	-0.788865	5.70893	0.402642	1	0.395081
																											ENSOCUG00000002315	1004.31	833.635	1174.98	1.40947	0.495151	9.95085	0.357043	1	0.447279
																											ENSOCUG00000002316	279.436	263.555	295.316	1.12051	0.164159	8.12404	0.791671	1	0.101455
																											ENSOCUG00000002318	160.091	100.265	219.916	2.19334	1.13313	7.21425	0.0955775	1	1.01964
																											ENSOCUG00000002320	1002.87	1047.53	958.207	0.914726	-0.128588	9.96849	0.812125	1	0.0903769
																											ENSOCUG00000002322	194.315	193.846	194.783	1.00483	0.00695493	7.60225	1	1	0
																											ENSOCUG00000002323	403.679	455.491	351.866	0.772498	-0.372396	8.64508	0.521348	1	0.282873
																											ENSOCUG00000002324	1646.98	1598.52	1695.45	1.06064	0.0849355	10.685	0.872531	1	0.0592193
																											ENSOCUG00000002325	400.768	450.717	350.819	0.778358	-0.361494	8.63533	0.534059	1	0.272411
																											ENSOCUG00000002326	61.5583	69.7083	53.4083	0.766168	-0.384267	5.93112	0.676904	1	0.169473
																											ENSOCUG00000002332	307.496	278.833	336.158	1.20559	0.269737	8.25813	0.655534	1	0.183405
																											ENSOCUG00000002334	59.6023	66.8436	52.3611	0.783337	-0.352295	5.88657	0.707745	1	0.150123
																											ENSOCUG00000002336	521.314	621.645	420.983	0.677208	-0.56233	8.99878	0.319076	1	0.496106
																											ENSOCUG00000002337	12.6446	20.0531	5.23611	0.261112	-1.93726	3.35712	0.316678	1	0.499382
																											ENSOCUG00000002338	20.2218	25.7825	14.6611	0.568645	-0.814401	4.28112	0.587499	1	0.230993
																											ENSOCUG00000002341	3439.39	2820.8	4057.98	1.43859	0.524659	11.7242	0.31002	1	0.50861
																											ENSOCUG00000002342	16.3863	7.63927	25.1333	3.29002	1.71809	3.79248	0.297089	1	0.527114
																											ENSOCUG00000002344	1190.71	1115.33	1266.09	1.13517	0.182906	10.2147	0.732011	1	0.135482
																											ENSOCUG00000002346	378.186	343.767	412.605	1.20025	0.263331	8.55695	0.653875	1	0.184506
																											ENSOCUG00000002349	17.973	18.1433	17.8028	0.981233	-0.0273326	4.1677	1	1	0
																											ENSOCUG00000002350	90.6353	96.4457	84.8249	0.879509	-0.185229	6.49903	0.825135	1	0.0834747
																											ENSOCUG00000002352	898.805	914.802	882.807	0.965026	-0.051361	9.81164	0.926334	1	0.0332323
																											ENSOCUG00000002353	349.187	337.083	361.291	1.07182	0.10006	8.44699	0.869518	1	0.0607213
																											ENSOCUG00000002356	51.8231	21.9629	81.6832	3.71915	1.89497	5.40448	0.0517347	1	1.28622
																											ENSOCUG00000002357	9.10189	6.68436	11.5194	1.72334	0.785209	3.13339	0.759073	1	0.119716
																											ENSOCUG00000002358	327.504	352.361	302.647	0.858911	-0.219419	8.3512	0.715191	1	0.145578
																											ENSOCUG00000002359	153.44	140.372	166.508	1.1862	0.246343	7.25628	0.723987	1	0.140269
																											ENSOCUG00000002360	960.871	974.006	947.735	0.973028	-0.0394474	9.90806	0.943584	1	0.0252194
																											ENSOCUG00000002361	459.85	582.494	337.205	0.578899	-0.788617	8.79179	0.168404	1	0.773648
																											ENSOCUG00000002362	41.2283	35.3316	47.1249	1.33379	0.415532	5.35065	0.703404	1	0.152795
																											ENSOCUG00000002363	57.5699	76.3927	38.7472	0.507211	-0.979343	5.76569	0.287087	1	0.541987
																											ENSOCUG00000002364	4.86685	7.63927	2.09444	0.274168	-1.86687	2	0.624912	1	0.204181
																											ENSOCUG00000002366	8.05467	6.68436	9.42499	1.41001	0.495702	2.98864	0.883895	1	0.0535993
																											ENSOCUG00000002368	683.576	709.497	657.655	0.926931	-0.109466	9.41592	0.844581	1	0.0733584
																											ENSOCUG00000002369	20.9459	32.4669	9.42499	0.290296	-1.78441	4.12869	0.220984	1	0.655638
																											ENSOCUG00000002371	668.241	452.626	883.855	1.95272	0.965488	9.30492	0.0818525	1	1.08697
																											ENSOCUG00000002372	522.015	455.491	588.538	1.2921	0.369713	9.01614	0.512497	1	0.290308
																											ENSOCUG00000002375	2116.52	1753.21	2479.82	1.41444	0.500235	11.0259	0.338056	1	0.471012
																											ENSOCUG00000002376	64.6538	70.6632	58.6444	0.829914	-0.268966	6.0084	0.771921	1	0.112427
																											ENSOCUG00000002378	568.285	614.006	522.563	0.851072	-0.232647	9.14579	0.678862	1	0.168219
																											ENSOCUG00000002380	606.55	515.65	697.449	1.35256	0.435695	9.2281	0.433694	1	0.362816
																											ENSOCUG00000002381	4.91301	6.68436	3.14166	0.470002	-1.08926	2.19616	0.793008	1	0.100722
																											ENSOCUG00000002382	1.00106	0.954908	1.04722	1.09667	0.133132	-1.1212e-15	1	1	0
																											ENSOCUG00000002383	9.57935	7.63927	11.5194	1.50792	0.592564	3.22972	0.822937	1	0.0846334
																											ENSOCUG00000002384	181.532	176.658	186.405	1.05518	0.077484	7.50356	0.914501	1	0.0388158
																											ENSOCUG00000002386	196.532	180.478	212.586	1.17791	0.236226	7.61379	0.719916	1	0.142718
																											ENSOCUG00000002387	349.973	353.316	346.63	0.981077	-0.027562	8.45103	0.968014	1	0.0141184
																											ENSOCUG00000002389	1132.21	1209.87	1054.55	0.871625	-0.198221	10.1415	0.711187	1	0.148016
																											ENSOCUG00000002390	111.627	127.958	95.2971	0.744755	-0.425163	6.78694	0.569842	1	0.244245
																											ENSOCUG00000002391	467.467	457.401	477.533	1.04401	0.0621402	8.86839	0.916799	1	0.0377259
																											ENSOCUG00000002392	5348.31	3593.32	7103.3	1.97681	0.983172	12.3027	0.0572246	1	1.24242
																											ENSOCUG00000002393	105.128	110.769	99.486	0.898137	-0.154993	6.71392	0.847673	1	0.0717715
																											ENSOCUG00000002394	2509.84	2347.16	2672.51	1.13861	0.187275	11.2903	0.718638	1	0.14349
																											ENSOCUG00000002395	480.25	474.589	485.911	1.02385	0.034011	8.90754	0.956137	1	0.0194798
																											ENSOCUG00000002397	356.458	392.467	320.45	0.8165	-0.292475	8.47019	0.62092	1	0.206964
																											ENSOCUG00000002398	231.12	169.019	293.222	1.73485	0.794809	7.79844	0.206611	1	0.684846
																											ENSOCUG00000002399	6.66847	2.86472	10.4722	3.65557	1.8701	2.45345	0.522738	1	0.281716
																											ENSOCUG00000002401	12.0589	10.504	13.6139	1.29607	0.37414	3.57994	0.883684	1	0.053703
																											ENSOCUG00000002403	273.52	223.449	323.591	1.44817	0.53423	8.07091	0.382432	1	0.417446
																											ENSOCUG00000002406	113.244	127.003	99.486	0.783337	-0.352295	6.81257	0.63822	1	0.19503
																											ENSOCUG00000002407	356.872	351.406	362.338	1.03111	0.0441983	8.4791	0.945024	1	0.0245574
																											ENSOCUG00000002409	122.899	89.7614	156.036	1.73834	0.797712	6.88688	0.26915	1	0.570006
																											ENSOCUG00000002410	831.17	667.481	994.86	1.49047	0.575767	9.67047	0.289766	1	0.537952
																											ENSOCUG00000002411	10.8271	14.3236	7.33055	0.51178	-0.966404	3.35712	0.658407	1	0.181506
																											ENSOCUG00000002413	21.4537	21.9629	20.9444	0.953628	-0.0685018	4.42275	0.999481	1	0.000225572
																											ENSOCUG00000002414	536.943	569.125	504.761	0.886906	-0.173147	9.06603	0.760156	1	0.119097
																											ENSOCUG00000002417	528.731	489.868	567.594	1.15867	0.212466	9.04248	0.707546	1	0.150246
																											ENSOCUG00000002418	45.8802	58.2494	33.5111	0.575303	-0.797605	5.46537	0.428943	1	0.3676
																											ENSOCUG00000002419	2711.75	2654.64	2768.85	1.04302	0.0607693	11.4047	0.907272	1	0.0422623
																											ENSOCUG00000002421	284.75	283.608	285.891	1.00805	0.0115701	8.15354	0.991352	1	0.0037723
																											ENSOCUG00000002425	16.2478	10.504	21.9916	2.09365	1.06602	3.92587	0.521988	1	0.28234
																											ENSOCUG00000002426	62.4035	30.5571	94.2499	3.08439	1.62499	5.74593	0.0714719	1	1.14586
																											ENSOCUG00000002427	171.107	208.17	134.044	0.643917	-0.635052	7.38409	0.341714	1	0.466337
																											ENSOCUG00000002428	328.841	292.202	365.48	1.25078	0.322827	8.35224	0.588798	1	0.230034
																											ENSOCUG00000002429	1419.64	1405.62	1433.65	1.01993	0.0284768	10.4712	0.958403	1	0.0184518
																											ENSOCUG00000002431	109.611	148.011	71.211	0.481121	-1.05553	6.68179	0.157664	1	0.802267
																											ENSOCUG00000002432	761.523	851.778	671.269	0.788079	-0.343587	9.56254	0.530048	1	0.275685
																											ENSOCUG00000002433	62.8348	32.4669	93.2027	2.8707	1.5214	5.7816	0.0897311	1	1.04706
																											ENSOCUG00000002434	104.881	105.04	104.722	0.996974	-0.00437149	6.71261	1	1	0
																											ENSOCUG00000002436	18.5125	28.6472	8.37777	0.292446	-1.77376	3.95345	0.253829	1	0.595458
																											ENSOCUG00000002437	203.108	185.252	220.964	1.19277	0.254318	7.66051	0.696831	1	0.156872
																											ENSOCUG00000002438	119.881	108.86	130.903	1.20249	0.266026	6.89934	0.720801	1	0.142184
																											ENSOCUG00000002439	485.661	590.133	381.188	0.645936	-0.630536	8.88963	0.267394	1	0.572848
																											ENSOCUG00000002441	898.544	931.036	866.052	0.930203	-0.104383	9.8105	0.848529	1	0.0713334
																											ENSOCUG00000002442	649.368	626.42	672.316	1.07327	0.10201	9.34199	0.855899	1	0.0675774
																											ENSOCUG00000002444	43.9386	33.4218	54.4555	1.62934	0.704289	5.41486	0.49333	1	0.306863
																											ENSOCUG00000002445	1330.81	1466.74	1194.88	0.81465	-0.295747	10.3705	0.577154	1	0.238708
																											ENSOCUG00000002447	68.3652	69.7083	67.0221	0.961466	-0.0566925	6.09491	0.966072	1	0.0149907
																											ENSOCUG00000002448	88.2178	103.13	73.3055	0.710806	-0.492472	6.44209	0.538732	1	0.268627
																											ENSOCUG00000002449	692.845	669.391	716.299	1.07008	0.0977139	9.43556	0.861189	1	0.0649017
																											ENSOCUG00000002450	3.61912	0.954908	6.28333	6.58003	2.71809	1.29248	0.583108	1	0.234251
																											ENSOCUG00000002451	1285.76	1423.77	1147.75	0.806138	-0.3109	10.32	0.558361	1	0.253085
																											ENSOCUG00000002455	679.4	655.067	703.733	1.07429	0.103385	9.40719	0.853314	1	0.0688914
																											ENSOCUG00000002456	477.758	526.154	429.361	0.816035	-0.293296	8.89269	0.607291	1	0.216603
																											ENSOCUG00000002458	41.0437	39.1512	42.9361	1.09667	0.133132	5.35755	0.92184	1	0.0353444
																											ENSOCUG00000002461	42.1529	48.7003	35.6055	0.731115	-0.45183	5.37994	0.67428	1	0.17116
																											ENSOCUG00000002463	799.217	721.911	876.524	1.21417	0.279973	9.63566	0.607874	1	0.216187
																											ENSOCUG00000002464	41.9221	53.4749	30.3694	0.567919	-0.816242	5.33267	0.435639	1	0.360873
																											ENSOCUG00000002466	11.3969	13.3687	9.42499	0.705003	-0.504298	3.48864	0.834549	1	0.0785481
																											ENSOCUG00000002468	5.34431	8.59417	2.09444	0.243705	-2.03679	2.08496	0.563258	1	0.249293
																											ENSOCUG00000002470	754	1007.43	500.572	0.496881	-1.00903	9.47195	0.0669052	1	1.17454
																											ENSOCUG00000002473	1036.2	1083.82	988.577	0.912122	-0.132702	10.0156	0.805786	1	0.0937802
																											ENSOCUG00000002476	220.912	217.719	224.105	1.02933	0.041709	7.78718	0.955092	1	0.0199549
																											ENSOCUG00000002477	7.34644	10.504	4.18888	0.39879	-1.3263	2.72972	0.635847	1	0.196647
																											ENSOCUG00000002478	58.0459	44.8807	71.211	1.58667	0.666006	5.82103	0.469125	1	0.328711
																											ENSOCUG00000002481	20.33	34.3767	6.28333	0.182779	-2.45183	3.87744	0.10767	1	0.967903
																											ENSOCUG00000002484	348.818	344.722	352.913	1.02376	0.0338818	8.44623	0.959374	1	0.018012
																											ENSOCUG00000002486	352.604	298.886	406.322	1.35945	0.443026	8.44497	0.452667	1	0.344221
																											ENSOCUG00000002487	1.95597	2.86472	1.04722	0.365557	-1.45183	0.792481	0.912276	1	0.0398736
																											ENSOCUG00000002489	398.618	256.87	540.366	2.10365	1.0729	8.54134	0.0661673	1	1.17936
																											ENSOCUG00000002492	12.7369	18.1433	7.33055	0.404037	-1.30744	3.52764	0.495868	1	0.304634
																											ENSOCUG00000002494	44.2474	48.7003	39.7944	0.817128	-0.291366	5.46018	0.790412	1	0.102146
																											ENSOCUG00000002495	323.729	311.3	336.158	1.07985	0.110833	8.33758	0.856836	1	0.0671025
																											ENSOCUG00000002497	43.9243	55.3847	32.4639	0.586152	-0.770653	5.40609	0.453394	1	0.343524
																											ENSOCUG00000002498	418.999	387.693	450.305	1.1615	0.215989	8.70676	0.710209	1	0.148614
																											ENSOCUG00000002503	12.1974	7.63927	16.7555	2.19334	1.13313	3.5	0.566153	1	0.247066
																											ENSOCUG00000002504	83.3653	73.5279	93.2027	1.26758	0.342079	6.37126	0.679137	1	0.168043
																											ENSOCUG00000002505	223.206	191.937	254.475	1.32583	0.406893	7.78793	0.521579	1	0.28268
																											ENSOCUG00000002506	1578.42	1522.12	1634.71	1.07397	0.102951	10.6233	0.845805	1	0.0727299
																											ENSOCUG00000002507	3.5268	2.86472	4.18888	1.46223	0.54817	1.79248	0.969829	1	0.0133048
																											ENSOCUG00000002509	39.5349	48.7003	30.3694	0.623598	-0.681312	5.2652	0.528434	1	0.277009
																											ENSOCUG00000002510	16.1093	13.3687	18.85	1.41001	0.495702	3.98864	0.787746	1	0.103614
																											ENSOCUG00000002512	260.508	243.502	277.514	1.13968	0.188627	8.0221	0.763451	1	0.117219
																											ENSOCUG00000002518	457.039	423.979	490.099	1.15595	0.209081	8.83239	0.716392	1	0.144849
																											ENSOCUG00000002519	137.178	151.83	122.525	0.806985	-0.309386	7.09162	0.664389	1	0.177577
																											ENSOCUG00000002522	37.563	35.3316	39.7944	1.12631	0.171606	5.22869	0.897495	1	0.0469679
																											ENSOCUG00000002523	131.31	143.236	119.383	0.833471	-0.262797	7.03085	0.717395	1	0.144242
																											ENSOCUG00000002528	431.507	443.077	419.936	0.94777	-0.0773905	8.75272	0.896684	1	0.0473606
																											ENSOCUG00000002530	224.807	180.478	269.136	1.49124	0.576514	7.78393	0.361848	1	0.441473
																											ENSOCUG00000002533	357.27	299.841	414.7	1.38306	0.467868	8.46199	0.426815	1	0.369761
																											ENSOCUG00000002535	80.2078	63.0239	97.3916	1.54531	0.627897	6.29178	0.444238	1	0.352384
																											ENSOCUG00000002536	69.7053	74.4828	64.9277	0.871714	-0.198074	6.1198	0.830771	1	0.0805187
																											ENSOCUG00000002537	548.477	547.162	549.791	1.0048	0.00691432	9.09928	0.993856	1	0.00267637
																											ENSOCUG00000002541	1885.89	1974.75	1797.03	0.910004	-0.136055	10.8794	0.795478	1	0.0993719
																											ENSOCUG00000002542	27.2595	21.008	33.5111	1.59516	0.6737	4.72972	0.601608	1	0.220686
																											ENSOCUG00000002543	930.987	823.131	1038.84	1.26206	0.335784	9.85287	0.534036	1	0.272429
																											ENSOCUG00000002549	4478.44	4939.74	4017.14	0.813229	-0.298266	12.1211	0.561808	1	0.250412
																											ENSOCUG00000002551	19.2669	23.8727	14.6611	0.614136	-0.703369	4.22561	0.65282	1	0.185207
																											ENSOCUG00000002554	267.316	275.968	258.664	0.937294	-0.0934264	8.06165	0.884534	1	0.0532856
																											ENSOCUG00000002555	945.106	747.693	1142.52	1.52806	0.611699	9.85215	0.257163	1	0.589792
																											ENSOCUG00000002556	1273.13	1284.35	1261.9	0.98252	-0.025441	10.3141	0.963368	1	0.016208
																											ENSOCUG00000002559	100.06	96.4457	103.675	1.07496	0.104277	6.64378	0.903912	1	0.0438738
																											ENSOCUG00000002563	217.245	185.252	249.239	1.3454	0.428037	7.74737	0.502101	1	0.299209
																											ENSOCUG00000002565	5.29815	9.54908	1.04722	0.109667	-3.1888	1.66096	0.394998	1	0.403406
																											ENSOCUG00000002566	5.43662	6.68436	4.18888	0.62667	-0.674223	2.40368	0.88347	1	0.0538081
																											ENSOCUG00000002569	3.09551	0.954908	5.23611	5.48336	2.45506	1.16096	0.668395	1	0.174967
																											ENSOCUG00000002572	98.9813	75.4377	122.525	1.62419	0.699716	6.58707	0.361722	1	0.441625
																											ENSOCUG00000002573	727.051	720.001	734.102	1.01958	0.027982	9.50585	0.961948	1	0.0168483
																											ENSOCUG00000002574	451.078	384.828	517.327	1.34431	0.426863	8.8015	0.456092	1	0.340947
																											ENSOCUG00000002577	24.6415	21.008	28.275	1.34592	0.428588	4.60716	0.764833	1	0.116433
																											ENSOCUG00000002580	66.379	78.3025	54.4555	0.695451	-0.52398	6.029	0.552777	1	0.25745
																											ENSOCUG00000002581	263.727	263.555	263.9	1.00131	0.0018875	8.0429	1	1	0
																											ENSOCUG00000002582	444.498	315.12	573.877	1.82114	0.864842	8.73218	0.132497	1	0.877795
																											ENSOCUG00000002583	520.339	511.831	528.847	1.03325	0.0471824	9.02311	0.936742	1	0.0283799
																											ENSOCUG00000002587	64.1604	59.2043	69.1166	1.16742	0.22333	5.9993	0.813539	1	0.0896218
																											ENSOCUG00000002591	33.0351	31.512	34.5583	1.09667	0.133132	5.04439	0.934497	1	0.0294219
																											ENSOCUG00000002593	1068.65	1105.78	1031.51	0.932834	-0.100308	10.0607	0.852774	1	0.0691658
																											ENSOCUG00000002594	3042.83	3041.38	3044.27	1.00095	0.00136973	11.5712	0.998601	1	0.000608193
																											ENSOCUG00000002595	4.95917	5.72945	4.18888	0.731115	-0.45183	2.29248	0.956713	1	0.0192182
																											ENSOCUG00000002596	19.6362	16.2334	23.0389	1.41922	0.505101	4.27345	0.753259	1	0.123056
																											ENSOCUG00000002598	1838.78	1855.39	1822.16	0.982094	-0.0260666	10.8445	0.961405	1	0.0170937
																											ENSOCUG00000002601	404.521	351.406	457.636	1.3023	0.38106	8.64753	0.511378	1	0.291258
																											ENSOCUG00000002603	84.3058	97.4006	71.211	0.731115	-0.45183	6.37994	0.579471	1	0.236968
																											ENSOCUG00000002604	1167.55	1128.7	1206.4	1.06884	0.0960427	10.1885	0.858263	1	0.0663795
																											ENSOCUG00000002605	1.00106	0.954908	1.04722	1.09667	0.133132	-1.1212e-15	1	1	0
																											ENSOCUG00000002606	13.5995	21.9629	5.23611	0.238407	-2.0685	3.42275	0.266621	1	0.574105
																											ENSOCUG00000002610	364.714	405.836	323.591	0.797345	-0.326724	8.50139	0.579007	1	0.237316
																											ENSOCUG00000002611	65.5467	63.0239	68.0694	1.08006	0.111106	6.03338	0.916036	1	0.0380872
																											ENSOCUG00000002612	17.7422	22.9178	12.5667	0.548336	-0.866868	4.08496	0.590506	1	0.228776
																											ENSOCUG00000002613	30778.4	38422.6	23134.2	0.602097	-0.731932	14.8637	0.151477	1	0.819654
																											ENSOCUG00000002617	35.3762	37.2414	33.5111	0.899833	-0.15227	5.1427	0.916422	1	0.0379046
																											ENSOCUG00000002619	159.4	147.056	171.744	1.16788	0.223897	7.31217	0.74679	1	0.126801
																											ENSOCUG00000002620	1.00106	0.954908	1.04722	1.09667	0.133132	-1.1212e-15	1	1	0
																											ENSOCUG00000002623	551.357	563.396	539.319	0.957264	-0.0630105	9.1065	0.913663	1	0.039214
																											ENSOCUG00000002624	49.3306	73.5279	25.1333	0.34182	-1.54869	5.42587	0.115795	1	0.93631
																											ENSOCUG00000002626	58.5536	34.3767	82.7305	2.40659	1.26699	5.73685	0.165864	1	0.780247
																											ENSOCUG00000002627	298.488	302.706	294.269	0.972129	-0.0407807	8.22138	0.951965	1	0.0213791
																											ENSOCUG00000002628	254.407	207.215	301.6	1.45549	0.541506	7.96574	0.381593	1	0.4184
																											ENSOCUG00000002629	767.431	729.55	805.313	1.10385	0.142543	9.58213	0.795666	1	0.0992691
																											ENSOCUG00000002630	71.354	94.5359	48.1722	0.509565	-0.972663	6.07646	0.253611	1	0.595832
																											ENSOCUG00000002631	262.126	275.014	249.239	0.906278	-0.141975	8.03237	0.822398	1	0.0849177
																											ENSOCUG00000002632	7.14592	3.81963	10.4722	2.74168	1.45506	2.66096	0.604384	1	0.218687
																											ENSOCUG00000002636	502.837	364.775	640.899	1.75697	0.813091	8.91741	0.1518	1	0.818728
																											ENSOCUG00000002637	73.8018	76.3927	71.211	0.932171	-0.101333	6.2047	0.920083	1	0.0361729
																											ENSOCUG00000002638	172.614	166.154	179.075	1.07776	0.108041	7.4304	0.878899	1	0.0560612
																											ENSOCUG00000002640	225.456	232.043	218.869	0.943228	-0.0843213	7.81609	0.900466	1	0.0455325
																											ENSOCUG00000002641	494.527	504.192	484.863	0.961665	-0.0563937	8.94963	0.924269	1	0.0342015
																											ENSOCUG00000002643	507.771	479.364	536.177	1.11852	0.161588	8.98577	0.777201	1	0.109467
																											ENSOCUG00000002647	346.924	351.406	342.441	0.974488	-0.0372831	8.43835	0.954844	1	0.0200675
																											ENSOCUG00000002652	116.679	131.777	101.58	0.770849	-0.37548	6.85422	0.612476	1	0.212911
																											ENSOCUG00000002653	476.784	448.807	504.761	1.12467	0.169504	8.8947	0.768012	1	0.114632
																											ENSOCUG00000002655	2.00213	1.90982	2.09444	1.09667	0.133132	1	1	1	0
																											ENSOCUG00000002656	7.53106	6.68436	8.37777	1.25334	0.325777	2.90368	0.952295	1	0.0212284
																											ENSOCUG00000002657	3507.44	3373.69	3641.19	1.07929	0.110081	11.7752	0.831317	1	0.0802336
																											ENSOCUG00000002658	690.586	781.115	600.058	0.768207	-0.380434	9.41917	0.489912	1	0.309881
																											ENSOCUG00000002660	42.7371	25.7825	59.6916	2.3152	1.21113	5.29389	0.240898	1	0.618167
																											ENSOCUG00000002661	4.8207	8.59417	1.04722	0.121852	-3.03679	1.58496	0.447839	1	0.348878
																											ENSOCUG00000002662	688.816	806.897	570.735	0.707321	-0.499563	9.40646	0.364589	1	0.438197
																											ENSOCUG00000002663	1229.25	1195.55	1262.95	1.05638	0.0791274	10.263	0.882992	1	0.054043
																											ENSOCUG00000002665	173.706	132.732	214.68	1.61739	0.693671	7.39921	0.296909	1	0.527376
																											ENSOCUG00000002667	1.95597	2.86472	1.04722	0.365557	-1.45183	0.792481	0.912276	1	0.0398736
																											ENSOCUG00000002669	1130.38	1507.8	752.952	0.499371	-1.00182	10.0573	0.0625294	1	1.20392
																											ENSOCUG00000002670	264.805	252.096	277.514	1.10083	0.138586	8.04712	0.82631	1	0.0828569
																											ENSOCUG00000002671	393.73	455.491	331.969	0.728816	-0.456374	8.60309	0.432863	1	0.36365
																											ENSOCUG00000002672	101.262	104.085	98.4388	0.945754	-0.0804634	6.66139	0.928997	1	0.0319857
																											ENSOCUG00000002674	8.53213	7.63927	9.42499	1.23376	0.303057	3.08496	0.948895	1	0.0227819
																											ENSOCUG00000002676	89.6501	105.995	73.3055	0.691595	-0.532001	6.46185	0.503597	1	0.297917
																											ENSOCUG00000002677	1683.66	1738.89	1628.43	0.936477	-0.0946843	10.7166	0.857812	1	0.066608
																											ENSOCUG00000002679	751.631	731.46	771.802	1.05515	0.0774523	9.55336	0.889535	1	0.0508369
																											ENSOCUG00000002682	32.4192	33.4218	31.4166	0.940005	-0.0892604	5.01809	0.967669	1	0.0142733
																											ENSOCUG00000002683	1665.47	1671.09	1659.85	0.993271	-0.00974005	10.7017	0.986504	1	0.0059012
																											ENSOCUG00000002686	714.635	630.239	799.03	1.26782	0.342349	9.47093	0.533347	1	0.272991
																											ENSOCUG00000002688	36.3614	27.6923	45.0305	1.6261	0.701416	5.14212	0.530559	1	0.275266
																											ENSOCUG00000002689	295.344	270.239	320.45	1.1858	0.245862	8.20102	0.686672	1	0.16325
																											ENSOCUG00000002690	1432.72	1589.92	1275.52	0.80225	-0.317876	10.4758	0.54772	1	0.261441
																											ENSOCUG00000002692	9.53319	8.59417	10.4722	1.21852	0.285135	3.24593	0.945745	1	0.0242257
																											ENSOCUG00000002693	1.00106	0.954908	1.04722	1.09667	0.133132	-1.1212e-15	1	1	0
																											ENSOCUG00000002694	100.923	100.265	101.58	1.01312	0.0187994	6.65708	0.995167	1	0.00210419
																											ENSOCUG00000002695	333.896	360.955	306.836	0.850066	-0.234354	8.3785	0.695553	1	0.15767
																											ENSOCUG00000002696	7.00745	6.68436	7.33055	1.09667	0.133132	2.80735	1	1	0
																											ENSOCUG00000002698	37.4707	37.2414	37.7	1.01231	0.0176548	5.22766	1	1	0
																											ENSOCUG00000002699	123.376	90.7163	156.036	1.72004	0.782445	6.89451	0.277934	1	0.556059
																											ENSOCUG00000002701	22.2542	16.2334	28.275	1.74177	0.800557	4.42118	0.572881	1	0.241936
																											ENSOCUG00000002702	42.1068	49.6552	34.5583	0.695965	-0.522914	5.37242	0.623404	1	0.205231
																											ENSOCUG00000002703	103.342	126.048	80.636	0.639725	-0.644476	6.65559	0.395899	1	0.402416
																											ENSOCUG00000002704	865.151	820.266	910.035	1.10944	0.14983	9.75486	0.783482	1	0.105971
																											ENSOCUG00000002705	332.648	354.271	311.025	0.877929	-0.187824	8.3748	0.754992	1	0.122058
																											ENSOCUG00000002706	120.898	120.318	121.478	1.00963	0.0138331	6.91763	0.997866	1	0.000927569
																											ENSOCUG00000002707	282.33	257.825	306.836	1.19009	0.251073	8.13579	0.682492	1	0.165903
																											ENSOCUG00000002710	7578.65	6956.51	8200.79	1.17887	0.2374	12.8828	0.642317	1	0.192251
																											ENSOCUG00000002711	58.8305	28.6472	89.0138	3.10724	1.63563	5.65814	0.0757588	1	1.12057
																											ENSOCUG00000002712	829.516	864.192	794.841	0.91975	-0.120686	9.69487	0.825868	1	0.0830896
																											ENSOCUG00000002716	378.2	321.804	434.597	1.3505	0.433495	8.54679	0.458435	1	0.338722
																											ENSOCUG00000002718	21.4075	22.9178	19.8972	0.868199	-0.203903	4.41645	0.917659	1	0.0373185
																											ENSOCUG00000002719	387.1	289.337	484.863	1.67577	0.744826	8.54902	0.201542	1	0.695634
																											ENSOCUG00000002720	566.283	612.096	520.469	0.850306	-0.233946	9.14064	0.677254	1	0.169248
																											ENSOCUG00000002722	1484.81	1313.95	1655.66	1.26006	0.333489	10.5264	0.52757	1	0.27772
																											ENSOCUG00000002724	423.928	404.881	442.975	1.09409	0.129725	8.72622	0.824944	1	0.0835757
																											ENSOCUG00000002725	181.147	173.793	188.5	1.08462	0.11719	7.49982	0.866145	1	0.0624095
																											ENSOCUG00000002727	1145.03	1128.7	1161.37	1.02894	0.0411614	10.161	0.940128	1	0.0268132
																											ENSOCUG00000002728	104.066	132.732	75.3999	0.56806	-0.815884	6.64443	0.280862	1	0.551506
																											ENSOCUG00000002730	156.333	102.175	210.491	2.0601	1.04272	7.19626	0.126524	1	0.897826
																											ENSOCUG00000002731	21.9773	21.9629	21.9916	1.00131	0.0018875	4.45794	1	1	0
																											ENSOCUG00000002733	1269.1	1454.33	1083.87	0.745276	-0.424153	10.2941	0.424807	1	0.371808
																											ENSOCUG00000002735	1.47852	1.90982	1.04722	0.548336	-0.866868	0.5	1	1	0
																											ENSOCUG00000002736	508.133	656.022	360.244	0.549134	-0.86477	8.92522	0.127494	1	0.89451
																											ENSOCUG00000002737	372.425	311.3	433.55	1.39271	0.477891	8.52111	0.414448	1	0.382529
																											ENSOCUG00000002738	249.236	281.698	216.775	0.769529	-0.377952	7.94903	0.544216	1	0.264228
																											ENSOCUG00000002739	239.487	255.915	223.058	0.871609	-0.198248	7.9004	0.75534	1	0.121857
																											ENSOCUG00000002740	82.0729	100.265	63.8805	0.637114	-0.650376	6.32249	0.424995	1	0.371616
																											ENSOCUG00000002742	342.471	302.706	382.236	1.26273	0.336546	8.41005	0.570682	1	0.243605
																											ENSOCUG00000002743	2347.18	2625.04	2069.31	0.788295	-0.343192	11.1865	0.509611	1	0.292761
																											ENSOCUG00000002744	31.2494	46.7905	15.7083	0.335716	-1.57469	4.7608	0.187525	1	0.72694
																											ENSOCUG00000002745	2454.56	1963.29	2945.83	1.50046	0.585401	11.2318	0.260813	1	0.58367
																											ENSOCUG00000002746	273.045	287.427	258.664	0.899927	-0.15212	8.09099	0.808005	1	0.0925858
																											ENSOCUG00000002748	1528.67	1706.42	1350.92	0.791666	-0.337037	10.5682	0.522783	1	0.281678
																											ENSOCUG00000002750	9.39472	11.4589	7.33055	0.639725	-0.644476	3.19616	0.807474	1	0.0928716
																											ENSOCUG00000002751	1446.17	1636.71	1255.62	0.767158	-0.382403	10.4854	0.469349	1	0.328504
																											ENSOCUG00000002752	68.0262	65.8887	70.1638	1.06488	0.0906968	6.08731	0.933669	1	0.0298069
																											ENSOCUG00000002754	244.538	259.735	229.341	0.882982	-0.179544	7.93112	0.777587	1	0.109251
																											ENSOCUG00000002755	8.57828	6.68436	10.4722	1.56667	0.647705	3.06464	0.819559	1	0.08642
																											ENSOCUG00000002756	409.961	423.024	396.897	0.938236	-0.0919768	8.67861	0.877395	1	0.0568046
																											ENSOCUG00000002759	130.461	117.454	143.469	1.2215	0.28865	7.02027	0.690155	1	0.161053
																											ENSOCUG00000002760	792.805	919.577	666.033	0.724282	-0.465377	9.61214	0.393543	1	0.405008
																											ENSOCUG00000002762	220.942	206.26	235.625	1.14237	0.192026	7.78433	0.7666	1	0.115431
																											ENSOCUG00000002763	936.662	987.375	885.949	0.897277	-0.156375	9.86927	0.773061	1	0.111786
																											ENSOCUG00000002764	60.3264	73.5279	47.1249	0.640912	-0.641801	5.87932	0.480248	1	0.318535
																											ENSOCUG00000002765	519.77	545.253	494.288	0.906531	-0.141572	9.01999	0.804236	1	0.0946165
																											ENSOCUG00000002766	116.447	104.085	128.808	1.23753	0.307462	6.85535	0.6803	1	0.167299
																											ENSOCUG00000002767	20.3603	22.9178	17.8028	0.776809	-0.364368	4.33621	0.828195	1	0.0818672
																											ENSOCUG00000002768	435.863	396.287	475.438	1.19973	0.262713	8.76176	0.648906	1	0.187818
																											ENSOCUG00000002770	35.2219	29.6022	40.8416	1.37968	0.464338	5.1198	0.690754	1	0.160677
																											ENSOCUG00000002773	20.6372	17.1883	24.0861	1.4013	0.486769	4.34674	0.755976	1	0.121492
																											ENSOCUG00000002775	923.155	963.502	882.807	0.916248	-0.12619	9.84905	0.816582	1	0.0880005
																											ENSOCUG00000002776	155.534	140.372	170.697	1.21604	0.282188	7.2742	0.683388	1	0.165333
																											ENSOCUG00000002777	306.001	266.419	345.583	1.29714	0.375333	8.24522	0.533363	1	0.272977
																											ENSOCUG00000002778	955.452	1010.29	900.61	0.891435	-0.165799	9.89766	0.759374	1	0.119544
																											ENSOCUG00000002779	1655.79	1567.96	1743.62	1.11203	0.1532	10.6913	0.771251	1	0.112804
																											ENSOCUG00000002780	49.2368	42.9709	55.5027	1.29164	0.369199	5.60989	0.716127	1	0.14501
																											ENSOCUG00000002781	545.615	606.367	484.863	0.799621	-0.322612	9.08274	0.566388	1	0.246886
																											ENSOCUG00000002782	1118.67	1067.59	1169.75	1.09569	0.131841	10.1261	0.806138	1	0.0935905
																											ENSOCUG00000002784	136.407	146.101	126.714	0.867303	-0.205393	7.08813	0.777458	1	0.109323
																											ENSOCUG00000002786	214.767	214.854	214.68	0.99919	-0.00116906	7.74663	1	1	0
																											ENSOCUG00000002788	35.2839	39.1512	31.4166	0.802443	-0.317529	5.13222	0.794876	1	0.0997004
																											ENSOCUG00000002789	14.3842	5.72945	23.0389	4.02113	2.0076	3.5222	0.26083	1	0.583643
																											ENSOCUG00000002790	2344.59	2429.29	2259.9	0.930274	-0.104272	11.1942	0.841692	1	0.0748468
																											ENSOCUG00000002791	2056.42	1609.98	2502.86	1.55459	0.636538	10.9711	0.223768	1	0.650202
																											ENSOCUG00000002793	46.4341	46.7905	46.0777	0.984767	-0.0221462	5.53707	1	1	0
																											ENSOCUG00000002794	77.7456	103.13	52.3611	0.507718	-0.977899	6.19937	0.23754	1	0.624262
																											ENSOCUG00000002795	188.463	195.756	181.169	0.925484	-0.11172	7.55705	0.871535	1	0.0597154
																											ENSOCUG00000002798	761.159	642.653	879.666	1.3688	0.452915	9.55435	0.407528	1	0.389842
																											ENSOCUG00000002800	6.43769	7.63927	5.23611	0.68542	-0.54494	2.66096	0.897977	1	0.0467347
																											ENSOCUG00000002801	133.388	132.732	134.044	1.00988	0.014191	7.05947	0.996113	1	0.00169129
																											ENSOCUG00000002802	151.145	133.687	168.603	1.26117	0.334766	7.2301	0.629227	1	0.201193
																											ENSOCUG00000002803	115.847	116.499	115.194	0.988803	-0.0162456	6.85605	0.995854	1	0.00180415
																											ENSOCUG00000002805	160.694	152.785	168.603	1.10353	0.142121	7.32642	0.841085	1	0.0751601
																											ENSOCUG00000002807	69.1052	86.8966	51.3138	0.590516	-0.759953	6.06125	0.378195	1	0.422284
																											ENSOCUG00000002809	384.862	508.966	260.758	0.512329	-0.964858	8.509	0.0994455	1	1.00241
																											ENSOCUG00000002811	62.7137	78.3025	47.1249	0.601832	-0.732567	5.9247	0.412287	1	0.3848
																											ENSOCUG00000002813	21.3152	24.8276	17.8028	0.717055	-0.479845	4.39395	0.756002	1	0.121477
																											ENSOCUG00000002814	76.7748	90.7163	62.8333	0.692635	-0.529833	6.23837	0.52701	1	0.278181
																											ENSOCUG00000002815	871.837	866.102	877.571	1.01324	0.0189797	9.76788	0.974341	1	0.011289
																											ENSOCUG00000002819	305.818	302.706	308.93	1.02056	0.0293641	8.25646	0.966907	1	0.0146153
																											ENSOCUG00000002820	32.8044	36.2865	29.3222	0.808074	-0.307441	5.02764	0.810055	1	0.0914852
																											ENSOCUG00000002821	1.00106	0.954908	1.04722	1.09667	0.133132	-1.1212e-15	1	1	0
																											ENSOCUG00000002822	41.5211	40.1061	42.9361	1.07056	0.0983666	5.37493	0.948971	1	0.0227469
																											ENSOCUG00000002826	249.898	278.833	220.964	0.792458	-0.335593	7.95546	0.590665	1	0.228658
																											ENSOCUG00000002827	345.553	358.091	333.016	0.929978	-0.104732	8.43181	0.863528	1	0.0637234
																											ENSOCUG00000002828	12697.6	14048.6	11346.6	0.80767	-0.308162	13.6241	0.545378	1	0.263302
																											ENSOCUG00000002831	411.879	275.014	548.744	1.99533	0.99663	8.60167	0.0862512	1	1.06424
																											ENSOCUG00000002832	297.318	316.075	278.561	0.881313	-0.182273	8.21298	0.766295	1	0.115604
																											ENSOCUG00000002834	222.098	214.854	229.341	1.06743	0.0941379	7.79428	0.888331	1	0.0514249
																											ENSOCUG00000002835	3290.86	2968.81	3612.91	1.21696	0.283278	11.6773	0.583426	1	0.234014
																											ENSOCUG00000002836	464.465	487.003	441.927	0.907442	-0.140122	8.85773	0.808712	1	0.0922061
																											ENSOCUG00000002838	1512.85	1037.03	1988.67	1.91766	0.939348	10.4879	0.0766872	1	1.11528
																											ENSOCUG00000002839	772.161	772.521	771.802	0.99907	-0.00134305	9.59276	1	1	0
																											ENSOCUG00000002840	1509.54	1300.58	1718.49	1.32132	0.401981	10.5459	0.446105	1	0.350563
																											ENSOCUG00000002844	448.265	508.011	388.519	0.764784	-0.386875	8.79528	0.5	1	0.30103
																											ENSOCUG00000002845	258.135	216.764	299.505	1.38171	0.466455	7.99321	0.450308	1	0.34649
																											ENSOCUG00000002846	674.025	657.932	690.119	1.04892	0.0689065	9.39625	0.903018	1	0.0443034
																											ENSOCUG00000002847	115.894	148.011	83.7777	0.566024	-0.821064	6.79903	0.263459	1	0.579287
																											ENSOCUG00000002848	19.3751	32.4669	6.28333	0.19353	-2.36937	3.83621	0.127665	1	0.893929
																											ENSOCUG00000002849	173.461	159.47	187.453	1.17547	0.233244	7.43376	0.730878	1	0.136155
																											ENSOCUG00000002851	240.828	293.157	188.5	0.643	-0.63711	7.87697	0.307941	1	0.511532
																											ENSOCUG00000002852	448.581	338.992	558.169	1.64655	0.719449	8.76483	0.209569	1	0.678673
																											ENSOCUG00000002853	1.00106	0.954908	1.04722	1.09667	0.133132	-1.1212e-15	1	1	0
																											ENSOCUG00000002855	587.553	670.346	504.761	0.752986	-0.409306	9.18411	0.463469	1	0.33398
																											ENSOCUG00000002857	538.048	481.274	594.822	1.23593	0.305599	9.06351	0.587557	1	0.23095
																											ENSOCUG00000002858	103.065	131.777	74.3527	0.56423	-0.825645	6.62914	0.276481	1	0.558334
																											ENSOCUG00000002859	463.73	567.215	360.244	0.63511	-0.654922	8.82029	0.25166	1	0.599185
																											ENSOCUG00000002861	506.095	535.704	476.486	0.889458	-0.169002	8.98079	0.76725	1	0.115063
																											ENSOCUG00000002862	10930	8317.25	13542.7	1.62826	0.703333	13.3736	0.169419	1	0.771038
																											ENSOCUG00000002863	68.0565	54.4298	81.6832	1.50071	0.585644	6.05915	0.500952	1	0.300204
																											ENSOCUG00000002864	54.0416	41.0611	67.0221	1.63226	0.706867	5.71313	0.454173	1	0.342779
																											ENSOCUG00000002865	64.0522	50.6101	77.4944	1.5312	0.614665	5.96869	0.489062	1	0.310636
																											ENSOCUG00000002867	276.03	214.854	337.205	1.56946	0.650268	8.07235	0.286911	1	0.542252
																											ENSOCUG00000002868	14.2918	7.63927	20.9444	2.74168	1.45506	3.66096	0.412677	1	0.38439
																											ENSOCUG00000002869	218.969	160.425	277.514	1.72987	0.790663	7.72108	0.213392	1	0.670822
																											ENSOCUG00000002872	129.045	125.093	132.997	1.06319	0.0883937	7.01105	0.911851	1	0.040076
																											ENSOCUG00000002873	65.4241	76.3927	54.4555	0.712837	-0.488356	6.01118	0.583145	1	0.234223
																											ENSOCUG00000002874	7355.19	8708.76	6001.62	0.689148	-0.537115	12.8197	0.294373	1	0.531101
																											ENSOCUG00000002876	39.3805	41.0611	37.7	0.918144	-0.123208	5.29809	0.932244	1	0.0304703
																											ENSOCUG00000002878	12.1974	7.63927	16.7555	2.19334	1.13313	3.5	0.566153	1	0.247066
																											ENSOCUG00000002879	172.307	183.342	161.272	0.879622	-0.185044	7.42587	0.787401	1	0.103804
																											ENSOCUG00000002881	606.847	617.826	595.869	0.964461	-0.052205	9.24495	0.928159	1	0.0323777
																											ENSOCUG00000002882	439.663	328.488	550.838	1.67689	0.745786	8.73259	0.194442	1	0.711211
																											ENSOCUG00000002883	4.91301	6.68436	3.14166	0.470002	-1.08926	2.19616	0.793008	1	0.100722
																											ENSOCUG00000002884	1046.2	1147.8	944.593	0.82296	-0.281106	10.0241	0.600487	1	0.221496
																											ENSOCUG00000002885	476.739	482.229	471.249	0.977232	-0.0332264	8.89696	0.957351	1	0.0189288
																											ENSOCUG00000002886	38.9492	39.1512	38.7472	0.98968	-0.0149666	5.2835	1	1	0
																											ENSOCUG00000002887	526.465	439.258	613.672	1.39706	0.482399	9.02012	0.392053	1	0.406656
																											ENSOCUG00000002888	440.642	503.237	378.047	0.751231	-0.412672	8.76876	0.472568	1	0.325535
																											ENSOCUG00000002892	407.791	467.905	347.677	0.743051	-0.428466	8.65584	0.459738	1	0.33749
																											ENSOCUG00000002893	3.00319	2.86472	3.14166	1.09667	0.133132	1.58496	1	1	0
																											ENSOCUG00000002894	164.237	166.154	162.319	0.97692	-0.0336871	7.35953	0.970009	1	0.013224
																											ENSOCUG00000002895	694.005	775.385	612.624	0.79009	-0.339911	9.42881	0.537283	1	0.269797
																											ENSOCUG00000002896	1.00106	0.954908	1.04722	1.09667	0.133132	-1.1212e-15	1	1	0
																											ENSOCUG00000002897	1497.6	1276.71	1718.49	1.34603	0.428708	10.5326	0.416632	1	0.380247
																											ENSOCUG00000002899	16.9099	7.63927	26.1805	3.4271	1.77699	3.82193	0.273205	1	0.563512
																											ENSOCUG00000002900	177.728	179.523	175.933	0.980005	-0.0291394	7.47345	0.974277	1	0.0113173
																											ENSOCUG00000002901	9.16394	16.2334	2.09444	0.12902	-2.95433	2.54373	0.235055	1	0.62883
																											ENSOCUG00000002903	5.71356	0.954908	10.4722	10.9667	3.45506	1.66096	0.330226	1	0.481189
																											ENSOCUG00000002904	754.185	689.444	818.927	1.18781	0.248302	9.55344	0.650637	1	0.186661
																											ENSOCUG00000002908	155.41	121.273	189.547	1.56297	0.644293	7.24427	0.344663	1	0.462606
																											ENSOCUG00000002909	1.47852	1.90982	1.04722	0.548336	-0.866868	0.5	1	1	0
																											ENSOCUG00000002910	1444.43	1499.21	1389.66	0.926932	-0.109464	10.4953	0.836773	1	0.0773926
																											ENSOCUG00000002913	137.071	175.703	98.4388	0.560256	-0.835841	7.03908	0.234563	1	0.62974
																											ENSOCUG00000002914	427.905	485.093	370.716	0.764216	-0.387947	8.72815	0.501058	1	0.300112
																											ENSOCUG00000002915	66.9631	55.3847	78.5416	1.41811	0.50397	6.0434	0.56673	1	0.246624
																											ENSOCUG00000002919	256.32	275.968	236.672	0.857605	-0.221615	7.99755	0.723408	1	0.140617
																											ENSOCUG00000002920	334.769	277.878	391.661	1.40947	0.495151	8.36588	0.404356	1	0.393236
																											ENSOCUG00000002923	3.00319	2.86472	3.14166	1.09667	0.133132	1.58496	1	1	0
																											ENSOCUG00000002924	4302.27	3146.42	5458.12	1.73471	0.794691	12.0168	0.124082	1	0.90629
																											ENSOCUG00000002926	63.0686	92.6261	33.5111	0.361789	-1.46678	5.79996	0.101913	1	0.991769
																											ENSOCUG00000002927	107.33	119.364	95.2971	0.798377	-0.324858	6.73679	0.670583	1	0.173548
																											ENSOCUG00000002928	816.354	974.006	658.702	0.676281	-0.564305	9.64563	0.300118	1	0.522708
																											ENSOCUG00000002929	11.8743	14.3236	9.42499	0.658003	-0.603834	3.53841	0.785667	1	0.104762
																											ENSOCUG00000002932	2.5719	0.954908	4.18888	4.38669	2.13313	1	0.763521	1	0.117179
																											ENSOCUG00000002933	15.9247	17.1883	14.6611	0.852967	-0.229438	3.98864	0.92725	1	0.032803
																											ENSOCUG00000002935	44.5546	31.512	57.5972	1.82779	0.870098	5.41288	0.391997	1	0.406718
																											ENSOCUG00000002936	526.188	444.987	607.388	1.36496	0.448855	9.02205	0.425875	1	0.370718
																											ENSOCUG00000002937	27.3518	19.0982	35.6055	1.86434	0.898667	4.7047	0.478583	1	0.320043
																											ENSOCUG00000002939	879.549	804.033	955.066	1.18784	0.248346	9.77528	0.647106	1	0.189024
																											ENSOCUG00000002940	298.376	229.178	367.575	1.60388	0.681569	8.18111	0.258761	1	0.587101
																											ENSOCUG00000002942	932.512	824.086	1040.94	1.26314	0.337017	9.85516	0.532493	1	0.273686
																											ENSOCUG00000002943	2912.83	2979.31	2846.35	0.95537	-0.0658685	11.5078	0.899304	1	0.0460932
																											ENSOCUG00000002944	337.085	392.467	281.702	0.717773	-0.4784	8.37723	0.420277	1	0.376464
																											ENSOCUG00000002945	137.24	161.379	113.1	0.700832	-0.51286	7.07788	0.46678	1	0.330888
																											ENSOCUG00000002947	4.00426	3.81963	4.18888	1.09667	0.133132	2	1	1	0
																											ENSOCUG00000002948	247.771	225.358	270.183	1.1989	0.261716	7.94694	0.676552	1	0.169699
																											ENSOCUG00000002949	237.438	254.96	219.916	0.862551	-0.213318	7.88747	0.737281	1	0.132367
																											ENSOCUG00000002950	498.255	513.741	482.769	0.939713	-0.0897074	8.96004	0.877265	1	0.0568692
																											ENSOCUG00000002951	245.293	254.96	235.625	0.924162	-0.113783	7.93724	0.860581	1	0.0652082
																											ENSOCUG00000002952	10.9194	12.4138	9.42499	0.759234	-0.397383	3.43518	0.885789	1	0.0526699
																											ENSOCUG00000002953	26.7359	21.008	32.4639	1.54531	0.627897	4.70681	0.631856	1	0.199382
																											ENSOCUG00000002954	898.697	906.208	891.185	0.983422	-0.0241169	9.81164	0.966646	1	0.0147326
																											ENSOCUG00000002955	150.206	142.281	158.13	1.11139	0.152368	7.22879	0.832194	1	0.0797753
																											ENSOCUG00000002958	537.274	410.611	663.938	1.61695	0.693278	9.02827	0.218212	1	0.661122
																											ENSOCUG00000002960	135.021	142.281	127.761	0.897946	-0.155299	7.07495	0.834182	1	0.078739
																											ENSOCUG00000002961	90.9584	89.7614	92.1555	1.02667	0.0379748	6.50701	0.976923	1	0.0101398
																											ENSOCUG00000002963	513.366	591.088	435.644	0.73702	-0.440224	8.98712	0.436092	1	0.360422
																											ENSOCUG00000002964	78.4826	55.3847	101.58	1.83409	0.875064	6.22895	0.288038	1	0.540549
																											ENSOCUG00000002965	153.101	136.552	169.65	1.24238	0.313111	7.24986	0.651132	1	0.186331
																											ENSOCUG00000002966	96.0099	93.581	98.4388	1.05191	0.073011	6.58465	0.938605	1	0.027517
																											ENSOCUG00000002970	162.25	174.748	149.753	0.856962	-0.222696	7.33779	0.747234	1	0.126543
																											ENSOCUG00000002972	673.269	630.239	716.299	1.13655	0.184662	9.39209	0.739172	1	0.131255
																											ENSOCUG00000002973	71.1838	76.3927	65.9749	0.863629	-0.211516	6.1496	0.816566	1	0.0880089
																											ENSOCUG00000002974	159.274	95.4908	223.058	2.33591	1.22399	7.18928	0.072655	1	1.13873
																											ENSOCUG00000002975	148.974	146.101	151.847	1.03933	0.0556533	7.21865	0.945691	1	0.0242507
																											ENSOCUG00000002976	497.254	512.786	481.722	0.939421	-0.0901562	8.95713	0.876667	1	0.0571655
																											ENSOCUG00000002977	105.48	60.1592	150.8	2.50668	1.32578	6.5736	0.0801017	1	1.09636
																											ENSOCUG00000002981	749.536	731.46	767.613	1.04943	0.0696008	9.54943	0.900979	1	0.0452854
																											ENSOCUG00000002982	36.7927	29.6022	43.9833	1.48581	0.571253	5.17326	0.611536	1	0.213578
																											ENSOCUG00000002983	2.04829	0.954908	3.14166	3.29002	1.71809	0.792481	0.868495	1	0.0612326
																											ENSOCUG00000002984	1671.44	1590.88	1752	1.10128	0.139181	10.7052	0.79171	1	0.101434
																											ENSOCUG00000002988	115	123.183	106.817	0.867136	-0.20567	6.84183	0.788108	1	0.103414
																											ENSOCUG00000002991	444.906	458.356	431.455	0.94131	-0.087258	8.7967	0.882497	1	0.0542869
																											ENSOCUG00000002993	232.093	213.899	250.286	1.17011	0.226644	7.85411	0.722127	1	0.141386
																											ENSOCUG00000002994	115.368	83.077	147.658	1.77736	0.82974	6.79125	0.258391	1	0.587722
																											ENSOCUG00000002996	7614.51	6593.64	8635.38	1.30965	0.389185	12.8815	0.446681	1	0.350003
																											ENSOCUG00000002997	885.476	757.242	1013.71	1.33869	0.420818	9.77502	0.437037	1	0.359482
																											ENSOCUG00000002998	273.986	311.3	236.672	0.76027	-0.395417	8.08445	0.518927	1	0.284894
																											ENSOCUG00000002999	8.96343	9.54908	8.37777	0.877338	-0.188796	3.16096	0.989553	1	0.00456082
																											ENSOCUG00000003000	4.95917	5.72945	4.18888	0.731115	-0.45183	2.29248	0.956713	1	0.0192182
																											ENSOCUG00000003001	18.0653	16.2334	19.8972	1.22569	0.293597	4.1677	0.880599	1	0.0552216
																											ENSOCUG00000003002	1040.22	1065.68	1014.76	0.952218	-0.0706364	10.0222	0.896809	1	0.0473001
																											ENSOCUG00000003003	1268.12	1247.11	1289.13	1.03369	0.0478079	10.3083	0.929687	1	0.0316632
																											ENSOCUG00000003005	2.47958	2.86472	2.09444	0.731115	-0.45183	1.29248	1	1	0
																											ENSOCUG00000003006	278.084	345.677	210.491	0.608926	-0.715662	8.07545	0.241082	1	0.617835
																											ENSOCUG00000003008	59.0946	77.3476	40.8416	0.528027	-0.921316	5.81263	0.311939	1	0.50593
																											ENSOCUG00000003009	489.474	467.905	511.044	1.0922	0.127231	8.93369	0.825246	1	0.0834165
																											ENSOCUG00000003010	1078.77	874.696	1282.85	1.46662	0.552494	10.0489	0.302449	1	0.519348
																											ENSOCUG00000003012	303.736	248.276	359.197	1.44676	0.532829	8.22222	0.376049	1	0.424755
																											ENSOCUG00000003013	10.7348	16.2334	5.23611	0.322551	-1.6324	3.2047	0.44324	1	0.353361
																											ENSOCUG00000003015	715.839	702.812	728.866	1.03707	0.0525136	9.48325	0.926254	1	0.0332699
																											ENSOCUG00000003016	127.197	130.822	123.572	0.944579	-0.082257	6.99034	0.919396	1	0.0364976
																											ENSOCUG00000003017	30.9566	42.016	19.8972	0.473563	-1.07837	4.85368	0.366388	1	0.436059
																											ENSOCUG00000003018	654.406	684.669	624.144	0.911599	-0.133529	9.3525	0.811082	1	0.0909353
																											ENSOCUG00000003020	184.258	185.252	183.264	0.989266	-0.0155697	7.52556	0.990496	1	0.00414734
																											ENSOCUG00000003023	409.932	466.95	352.913	0.755784	-0.403954	8.66515	0.485661	1	0.313667
																											ENSOCUG00000003025	836.823	1005.52	668.127	0.66446	-0.589745	9.67885	0.278174	1	0.555683
																											ENSOCUG00000003026	420.387	423.979	416.794	0.983053	-0.0246592	8.71552	0.97041	1	0.0130445
																											ENSOCUG00000003027	225.933	232.998	218.869	0.939362	-0.0902462	7.81905	0.892885	1	0.0492045
																											ENSOCUG00000003028	90.9743	100.265	81.6832	0.814671	-0.295711	6.49982	0.714858	1	0.14578
																											ENSOCUG00000003029	140.735	143.236	138.233	0.965071	-0.0512925	7.13661	0.952199	1	0.0212722
																											ENSOCUG00000003030	9.53319	8.59417	10.4722	1.21852	0.285135	3.24593	0.945745	1	0.0242257
																											ENSOCUG00000003031	242.66	276.923	208.397	0.752544	-0.410152	7.90827	0.512056	1	0.290682
																											ENSOCUG00000003032	108.177	112.679	103.675	0.920089	-0.120154	6.756	0.883647	1	0.0537213
																											ENSOCUG00000003033	25.3656	27.6923	23.0389	0.831958	-0.265417	4.65871	0.864613	1	0.0631782
																											ENSOCUG00000003035	109.948	119.364	100.533	0.842244	-0.24769	6.77537	0.746991	1	0.126685
																											ENSOCUG00000003036	60.3567	62.069	58.6444	0.944825	-0.0818809	5.91486	0.946934	1	0.0236804
																											ENSOCUG00000003038	75.7276	90.7163	60.7388	0.669547	-0.578743	6.21392	0.490618	1	0.309256
																											ENSOCUG00000003039	9.00958	8.59417	9.42499	1.09667	0.133132	3.16993	1	1	0
																											ENSOCUG00000003040	219.005	278.833	159.178	0.57087	-0.808765	7.71888	0.203538	1	0.691355
																											ENSOCUG00000003042	939.447	940.585	938.31	0.997582	-0.00349296	9.87567	0.997115	1	0.00125482
																											ENSOCUG00000003043	30.2786	34.3767	26.1805	0.761578	-0.392937	4.90689	0.760864	1	0.118693
																											ENSOCUG00000003044	10.0568	8.59417	11.5194	1.34038	0.422639	3.31468	0.884126	1	0.0534857
																											ENSOCUG00000003045	1100.12	1050.4	1149.85	1.09468	0.130507	10.102	0.808259	1	0.0924495
																											ENSOCUG00000003046	63.9917	73.5279	54.4555	0.74061	-0.433215	5.98361	0.631119	1	0.199889
																											ENSOCUG00000003047	131.281	187.162	75.3999	0.402859	-1.31165	6.89232	0.0670351	1	1.1737
																											ENSOCUG00000003048	18.2038	13.3687	23.0389	1.72334	0.785209	4.13339	0.622065	1	0.206164
																											ENSOCUG00000003050	264.698	275.968	253.427	0.91832	-0.12293	8.04689	0.846551	1	0.0723466
																											ENSOCUG00000003052	6.39153	8.59417	4.18888	0.48741	-1.03679	2.58496	0.751193	1	0.124249
																											ENSOCUG00000003053	32.7582	37.2414	28.275	0.759234	-0.397383	5.02014	0.747579	1	0.126343
																											ENSOCUG00000003055	366.394	446.897	285.891	0.639725	-0.644476	8.48156	0.272272	1	0.564997
																											ENSOCUG00000003057	613.543	544.298	682.788	1.25444	0.327042	9.25177	0.556748	1	0.254341
																											ENSOCUG00000003059	196.656	199.576	193.736	0.970738	-0.0428456	7.61937	0.955668	1	0.0196931
																											ENSOCUG00000003060	39.5492	26.7374	52.3611	1.95834	0.969633	5.22561	0.363632	1	0.439337
																											ENSOCUG00000003061	5.62125	2.86472	8.37777	2.92446	1.54817	2.29248	0.646776	1	0.189246
																											ENSOCUG00000003062	70.7366	63.9789	77.4944	1.21125	0.276496	6.13777	0.756335	1	0.121286
																											ENSOCUG00000003064	126.289	127.958	124.619	0.97391	-0.0381394	6.98045	0.969684	1	0.0133697
																											ENSOCUG00000003068	21557.6	21177	21938.2	1.03595	0.0509492	14.3957	0.9202	1	0.0361178
																											ENSOCUG00000003071	133.835	145.146	122.525	0.844149	-0.244431	7.05915	0.735818	1	0.13323
																											ENSOCUG00000003073	309.453	314.165	304.741	0.970005	-0.0439364	8.27341	0.947259	1	0.0235311
																											ENSOCUG00000003078	203.775	279.788	127.761	0.456635	-1.13089	7.56275	0.0808436	1	1.09235
																											ENSOCUG00000003079	6.62231	3.81963	9.42499	2.46751	1.30306	2.58496	0.665561	1	0.176812
																											ENSOCUG00000003080	25.9815	25.7825	26.1805	1.01544	0.0221007	4.69937	1	1	0
																											ENSOCUG00000003082	19.3433	11.4589	27.2277	2.37612	1.24861	4.1427	0.40597	1	0.391506
																											ENSOCUG00000003083	18.0494	5.72945	30.3694	5.30058	2.40615	3.72147	0.133802	1	0.873537
																											ENSOCUG00000003085	1.95597	2.86472	1.04722	0.365557	-1.45183	0.792481	0.912276	1	0.0398736
																											ENSOCUG00000003087	2.47958	2.86472	2.09444	0.731115	-0.45183	1.29248	1	1	0
																											ENSOCUG00000003091	655.812	763.927	547.697	0.716949	-0.480057	9.33726	0.385415	1	0.414072
																											ENSOCUG00000003095	9.77986	14.3236	5.23611	0.365557	-1.45183	3.11441	0.52196	1	0.282363
																											ENSOCUG00000003096	361.276	336.128	386.425	1.14964	0.201177	8.49345	0.734645	1	0.133922
																											ENSOCUG00000003097	943.658	1080.96	806.36	0.745969	-0.422812	9.86669	0.433219	1	0.363292
																											ENSOCUG00000003098	156.89	155.65	158.13	1.01594	0.0228086	7.29357	0.983726	1	0.00712581
																											ENSOCUG00000003101	2117.85	2256.45	1979.25	0.877152	-0.189101	11.0453	0.717292	1	0.144304
																											ENSOCUG00000003102	718.491	756.287	680.694	0.900046	-0.151929	9.48683	0.783543	1	0.105937
																											ENSOCUG00000003103	68.257	61.1141	75.3999	1.23376	0.303057	6.08496	0.735646	1	0.133331
																											ENSOCUG00000003105	85.7223	89.7614	81.6832	0.910004	-0.136055	6.42	0.87832	1	0.0563471
																											ENSOCUG00000003106	173.582	113.634	233.53	2.05511	1.03921	7.34786	0.119234	1	0.923601
																											ENSOCUG00000003108	53.5498	62.069	45.0305	0.725491	-0.462971	5.72432	0.631701	1	0.199489
																											ENSOCUG00000003110	51.5015	61.1141	41.8888	0.68542	-0.54494	5.66096	0.57569	1	0.239811
																											ENSOCUG00000003112	65.1933	81.1672	49.2194	0.606395	-0.72167	5.98199	0.41279	1	0.38427
																											ENSOCUG00000003116	25.4118	26.7374	24.0861	0.900838	-0.150661	4.66546	0.9388	1	0.027427
																											ENSOCUG00000003118	13.738	19.0982	8.37777	0.438669	-1.1888	3.66096	0.518211	1	0.285494
																											ENSOCUG00000003119	328.32	357.136	299.505	0.838631	-0.253891	8.35338	0.671951	1	0.172662
																											ENSOCUG00000003120	2.43343	3.81963	1.04722	0.274168	-1.86687	1	0.816043	1	0.088287
																											ENSOCUG00000003122	1378.45	1239.47	1517.42	1.22425	0.291899	10.4215	0.581502	1	0.235449
																											ENSOCUG00000003124	358.274	365.73	350.819	0.95923	-0.0600513	8.48461	0.923375	1	0.0346218
																											ENSOCUG00000003125	27.0749	24.8276	29.3222	1.18103	0.240047	4.7539	0.874698	1	0.0581417
																											ENSOCUG00000003126	242.55	235.862	249.239	1.05671	0.0795826	7.92159	0.904703	1	0.0434939
																											ENSOCUG00000003128	32.5274	42.016	23.0389	0.548336	-0.866868	4.95943	0.459408	1	0.337801
																											ENSOCUG00000003129	45.1243	30.5571	59.6916	1.95345	0.966022	5.41645	0.338722	1	0.470157
																											ENSOCUG00000003131	63.005	50.6101	75.3999	1.48982	0.575137	5.94892	0.520829	1	0.283305
																											ENSOCUG00000003132	11.3969	13.3687	9.42499	0.705003	-0.504298	3.48864	0.834549	1	0.0785481
																											ENSOCUG00000003133	123.484	99.3105	147.658	1.48683	0.572244	6.92	0.428362	1	0.368189
																											ENSOCUG00000003134	61.6044	68.7534	54.4555	0.792041	-0.336353	5.93518	0.717607	1	0.144113
																											ENSOCUG00000003136	435.358	471.725	398.991	0.845814	-0.241588	8.76101	0.675904	1	0.170115
																											ENSOCUG00000003137	56.2442	49.6552	62.8333	1.26539	0.339583	5.80367	0.72466	1	0.139866
																											ENSOCUG00000003139	1591.4	1546	1636.81	1.05874	0.0823468	10.6355	0.876608	1	0.0571946
																											ENSOCUG00000003140	87.6768	60.1592	115.194	1.91482	0.937212	6.37932	0.238538	1	0.622443
																											ENSOCUG00000003141	780.574	858.462	702.685	0.818539	-0.288876	9.60117	0.597141	1	0.223923
																											ENSOCUG00000003142	14.6308	11.4589	17.8028	1.55362	0.635632	3.83621	0.735007	1	0.133708
																											ENSOCUG00000003143	120.252	133.687	106.817	0.799004	-0.323726	6.90085	0.661113	1	0.179724
																											ENSOCUG00000003144	315.047	393.422	236.672	0.601572	-0.73319	8.25334	0.221227	1	0.655162
																											ENSOCUG00000003145	128.289	97.4006	159.178	1.63426	0.708634	6.96018	0.321011	1	0.493481
																											ENSOCUG00000003148	38.7948	31.512	46.0777	1.46223	0.54817	5.25191	0.618268	1	0.208823
																											ENSOCUG00000003150	488.521	498.462	478.58	0.960113	-0.0587236	8.93198	0.921121	1	0.0356832
																											ENSOCUG00000003152	1628.48	1450.51	1806.46	1.2454	0.316607	10.6606	0.547321	1	0.261758
																											ENSOCUG00000003153	176.972	151.83	202.114	1.33118	0.412706	7.45267	0.535082	1	0.27158
																											ENSOCUG00000003155	1591.66	1843.93	1339.4	0.726382	-0.4612	10.618	0.381274	1	0.418763
																											ENSOCUG00000003156	16.0791	24.8276	7.33055	0.295258	-1.75995	3.7539	0.294091	1	0.531518
																											ENSOCUG00000003157	101.232	115.544	86.9193	0.752263	-0.410692	6.64695	0.594315	1	0.225984
																											ENSOCUG00000003160	1365.49	1204.14	1526.85	1.268	0.342554	10.4051	0.517814	1	0.285827
																											ENSOCUG00000003161	25.7969	29.6022	21.9916	0.742907	-0.428747	4.67326	0.759193	1	0.119648
																											ENSOCUG00000003163	1990.25	2361.49	1619	0.685586	-0.54459	10.9332	0.298021	1	0.525753
																											ENSOCUG00000003165	3856.18	4987.49	2724.87	0.546341	-0.872126	11.848	0.0923899	1	1.03438
																											ENSOCUG00000003168	2378.53	2268.86	2488.2	1.09667	0.133132	11.2143	0.798352	1	0.0978055
																											ENSOCUG00000003169	1068.12	1040.85	1095.39	1.0524	0.0736867	10.0604	0.892056	1	0.0496079
																											ENSOCUG00000003170	871.722	727.64	1015.8	1.39603	0.481326	9.74774	0.37452	1	0.426525
																											ENSOCUG00000003173	212.858	211.035	214.68	1.01727	0.0247096	7.73369	0.977248	1	0.00999536
																											ENSOCUG00000003174	1470.86	1851.57	1090.16	0.588775	-0.764211	10.4724	0.149203	1	0.826222
																											ENSOCUG00000003176	295.729	273.104	318.355	1.16569	0.221188	8.2039	0.717204	1	0.144358
																											ENSOCUG00000003178	1399.66	1320.64	1478.68	1.11967	0.163071	10.4486	0.7585	1	0.120044
																											ENSOCUG00000003179	814.758	768.701	860.816	1.11983	0.163282	9.66792	0.765361	1	0.116134
																											ENSOCUG00000003181	101.862	91.6712	112.053	1.22233	0.289637	6.66321	0.710252	1	0.148587
																											ENSOCUG00000003182	45.4474	23.8727	67.0221	2.80748	1.48928	5.32193	0.141134	1	0.850368
																											ENSOCUG00000003185	951.821	1096.23	807.407	0.736528	-0.441188	9.87775	0.413272	1	0.383764
																											ENSOCUG00000003186	130.493	138.462	122.525	0.884901	-0.176412	7.02514	0.81232	1	0.0902727
																											ENSOCUG00000003187	114.214	106.95	121.478	1.13584	0.183758	6.83267	0.811892	1	0.0905019
																											ENSOCUG00000003188	1645.46	1694.96	1595.96	0.941593	-0.0868241	10.6836	0.869737	1	0.0606121
																											ENSOCUG00000003189	100.784	103.13	98.4388	0.954511	-0.0671666	6.65474	0.943387	1	0.0253099
																											ENSOCUG00000003190	1733.97	1673	1794.94	1.07289	0.101496	10.759	0.847395	1	0.0719141
																											ENSOCUG00000003191	10.8732	13.3687	8.37777	0.62667	-0.674223	3.40368	0.771171	1	0.112849
																											ENSOCUG00000003196	2083.96	2480.85	1687.07	0.680038	-0.556313	10.9985	0.287169	1	0.541862
																											ENSOCUG00000003198	32.6961	27.6923	37.7	1.36139	0.445076	5.01395	0.714651	1	0.145906
																											ENSOCUG00000003199	1357.52	1661.54	1053.5	0.634053	-0.657325	10.3696	0.215586	1	0.66638
																											ENSOCUG00000003201	353.915	347.587	360.244	1.03642	0.0516021	8.46703	0.935021	1	0.0291785
																											ENSOCUG00000003202	852.832	858.462	847.202	0.986883	-0.0190494	9.73609	0.974363	1	0.0112791
																											ENSOCUG00000003203	121.269	145.146	97.3916	0.67099	-0.575637	6.89354	0.428332	1	0.36822
																											ENSOCUG00000003204	101.338	91.6712	111.005	1.21091	0.27609	6.65644	0.724319	1	0.14007
																											ENSOCUG00000003208	242.92	228.223	257.616	1.12879	0.17478	7.92169	0.783697	1	0.105852
																											ENSOCUG00000003209	373.556	461.221	285.891	0.619858	-0.68999	8.50432	0.238832	1	0.621908
																											ENSOCUG00000003211	78.621	52.52	104.722	1.99395	0.995629	6.21261	0.226587	1	0.644765
																											ENSOCUG00000003212	5.82176	9.54908	2.09444	0.219334	-2.1888	2.16096	0.506923	1	0.295058
																											ENSOCUG00000003213	257.027	239.682	274.372	1.14473	0.195011	8.00248	0.756054	1	0.121447
																											ENSOCUG00000003214	46.5423	55.3847	37.7	0.680693	-0.554924	5.51395	0.584706	1	0.233063
																											ENSOCUG00000003215	33.051	42.016	24.0861	0.57326	-0.802738	4.9915	0.491163	1	0.308775
																											ENSOCUG00000003217	168.376	102.175	234.578	2.29584	1.19902	7.27441	0.0749563	1	1.12519
																											ENSOCUG00000003220	4.00426	3.81963	4.18888	1.09667	0.133132	2	1	1	0
																											ENSOCUG00000003221	68.5196	77.3476	59.6916	0.771732	-0.373828	6.08637	0.672946	1	0.17202
																											ENSOCUG00000003226	379.897	373.369	386.425	1.03497	0.0495842	8.56925	0.936862	1	0.0283244
																											ENSOCUG00000003227	172.29	140.372	204.208	1.45477	0.54079	7.4035	0.417507	1	0.379336
																											ENSOCUG00000003228	52.0554	49.6552	54.4555	1.09667	0.133132	5.70044	0.908223	1	0.0418074
																											ENSOCUG00000003231	431.43	455.491	407.369	0.894351	-0.161087	8.75074	0.782091	1	0.106743
																											ENSOCUG00000003233	198.485	118.409	278.561	2.35254	1.23422	7.50474	0.0582386	1	1.23479
																											ENSOCUG00000003234	705.456	635.969	774.944	1.21852	0.285135	9.45538	0.604549	1	0.218569
																											ENSOCUG00000003236	78.9918	77.3476	80.636	1.04252	0.0600686	6.30332	0.958155	1	0.0185643
																											ENSOCUG00000003237	525.791	529.019	522.563	0.987797	-0.0177141	9.03832	0.978672	1	0.00936304
																											ENSOCUG00000003238	32.2807	36.2865	28.275	0.779214	-0.359908	5.00141	0.77526	1	0.110553
																											ENSOCUG00000003240	547.326	635.969	458.683	0.721235	-0.471459	9.07708	0.401318	1	0.396512
																											ENSOCUG00000003245	17746.1	17367.9	18124.3	1.04355	0.0615008	14.1149	0.903806	1	0.0439246
																											ENSOCUG00000003246	513.705	594.908	432.502	0.727007	-0.459958	8.98654	0.415736	1	0.381182
																											ENSOCUG00000003247	141.153	199.576	82.7305	0.414532	-1.27045	7.00557	0.0707094	1	1.15052
																											ENSOCUG00000003248	13.8303	17.1883	10.4722	0.609262	-0.714865	3.74593	0.710383	1	0.148507
																											ENSOCUG00000003249	1024.33	1166.9	881.76	0.755645	-0.40422	9.98635	0.451641	1	0.345207
																											ENSOCUG00000003250	305.39	365.73	245.05	0.670029	-0.577704	8.22578	0.336992	1	0.47238
																											ENSOCUG00000003251	1.95597	2.86472	1.04722	0.365557	-1.45183	0.792481	0.912276	1	0.0398736
																											ENSOCUG00000003252	57.7545	72.573	42.9361	0.591626	-0.757243	5.80274	0.410945	1	0.386216
																											ENSOCUG00000003254	21.3916	12.4138	30.3694	2.44642	1.29067	4.27921	0.364886	1	0.437843
																											ENSOCUG00000003255	1304.08	1261.43	1346.73	1.06762	0.0943922	10.348	0.859863	1	0.0655707
																											ENSOCUG00000003256	14.7231	9.54908	19.8972	2.08368	1.05913	3.78493	0.548571	1	0.260767
																											ENSOCUG00000003257	75.3265	77.3476	73.3055	0.947741	-0.077435	6.23457	0.942661	1	0.0256446
																											ENSOCUG00000003258	549.693	532.839	566.547	1.06326	0.0884955	9.1018	0.87746	1	0.0567725
																											ENSOCUG00000003260	25.4882	14.3236	36.6527	2.5589	1.35552	4.51809	0.298781	1	0.524647
																											ENSOCUG00000003262	364.822	414.43	315.214	0.760595	-0.3948	8.49759	0.501899	1	0.299384
																											ENSOCUG00000003263	12.7369	18.1433	7.33055	0.404037	-1.30744	3.52764	0.495868	1	0.304634
																											ENSOCUG00000003264	5.05148	3.81963	6.28333	1.64501	0.718095	2.29248	0.880898	1	0.0550742
																											ENSOCUG00000003265	261.692	208.17	315.214	1.51421	0.598567	8.0009	0.331079	1	0.480068
																											ENSOCUG00000003266	746.66	812.627	680.694	0.837646	-0.255587	9.53866	0.64136	1	0.192898
																											ENSOCUG00000003267	1007.81	880.425	1135.19	1.28936	0.366658	9.96539	0.495098	1	0.305308
																											ENSOCUG00000003269	4.43556	5.72945	3.14166	0.548336	-0.866868	2.08496	0.866108	1	0.062428
[truncated: 21,176 more rows]

## Sheet: GO Enrichment Analysis
Differential Expressed Gene: GO Annotation				#		Differential Expressed Gene: GO Enrichment Analysis															#
				#																	#
2HS 2-Fold up vs. 3HS		3HS 2-Fold up vs. 2HS		#		GOSlim	Description	GO	2HS Up		3HS Up		DE gene		Genome		Significant		Genes		#
ID	GO	ID	GO	#					Count	Percent	Count	Percent	Count	Percent	Count	Percent	P-value	-LOG10(P-value)	2HS	3HS	#
ENSOCUG00000000007	GO:0000139;GO:0005576;GO:0010634;GO:0010718;GO:0042803;GO:0070062;GO:0070374;GO:0005575;GO:0005576;	ENSOCUG00000000049	GO:0001867;GO:0003824;GO:0004252;GO:0004252;GO:0005509;GO:0005576;GO:0005615;GO:0006508;GO:0006956;GO:0008233;GO:0008236;GO:0016787;GO:0002376;GO:0003674;GO:0005575;GO:0005576;GO:0008150;GO:0008233;GO:0043167;	#		Biological Process	biological process	GO:0008150	126	0.128703	212	0.16085	338	0.147148	12105	0.180502	6.62112e-15	14.1791	ENSOCUG00000014282;ENSOCUG00000002243;ENSOCUG00000022947;ENSOCUG00000001933;ENSOCUG00000008858;ENSOCUG00000003056;ENSOCUG00000023790;ENSOCUG00000024555;ENSOCUG00000028053;ENSOCUG00000004231;ENSOCUG00000002902;ENSOCUG00000028094;ENSOCUG00000024196;ENSOCUG00000003905;ENSOCUG00000002424;ENSOCUG00000011808;ENSOCUG00000012042;ENSOCUG00000003285;ENSOCUG00000011443;ENSOCUG00000022201;ENSOCUG00000001923;…	ENSOCUG00000023425;ENSOCUG00000016746;ENSOCUG00000012307;ENSOCUG00000026015;ENSOCUG00000011386;ENSOCUG00000016347;ENSOCUG00000013779;ENSOCUG00000023532;ENSOCUG00000001813;ENSOCUG00000014422;ENSOCUG00000001822;ENSOCUG00000015109;ENSOCUG00000021669;ENSOCUG00000025593;ENSOCUG00000029348;ENSOCUG00000003679;ENSOCUG00000017309;ENSOCUG00000027459;ENSOCUG00000021159;ENSOCUG00000020975;ENSOCUG00000000786;…	#
ENSOCUG00000000010	GO:0005524;GO:0005975;GO:0006047;GO:0008761;GO:0009103;GO:0009384;GO:0016773;GO:0046380;GO:0046835;GO:0003674;GO:0005975;GO:0006629;GO:0008150;GO:0009058;GO:0016301;GO:0016853;GO:0034641;GO:0043167;GO:0044281;	ENSOCUG00000000078	GO:0003824;GO:0005515;GO:0005739;GO:0005739;GO:0005739;GO:0005743;GO:0008152;GO:0003674;GO:0005575;GO:0005622;GO:0005623;GO:0005737;GO:0005739;GO:0008150;GO:0043226;	#			aging	GO:0007568	1	0.00102145	2	0.00151745	3	0.00130605	85	0.00126746	0.263609	0.57904	ENSOCUG00000016068	ENSOCUG00000026304;ENSOCUG00000016465	#
ENSOCUG00000000104	GO:0003677;GO:0003700;GO:0005515;GO:0005515;GO:0005515;GO:0005634;GO:0006355;GO:0030529;GO:0043565;GO:0001071;GO:0003674;GO:0003677;GO:0005575;GO:0005622;GO:0005623;GO:0005634;GO:0008150;GO:0043226;	ENSOCUG00000000297	-	#			anatomical structure development	GO:0048856	66	0.0674157	75	0.0569044	141	0.0613844	3074	0.0458375	2.87411e-20	19.5415	ENSOCUG00000007978;ENSOCUG00000004073;ENSOCUG00000008229;ENSOCUG00000027804;ENSOCUG00000004340;ENSOCUG00000008303;ENSOCUG00000024465;ENSOCUG00000004422;ENSOCUG00000007086;ENSOCUG00000003792;ENSOCUG00000022296;ENSOCUG00000003768;ENSOCUG00000001454;ENSOCUG00000009050;ENSOCUG00000022093;ENSOCUG00000026228;ENSOCUG00000016576;ENSOCUG00000005357;ENSOCUG00000008439;ENSOCUG00000007620;ENSOCUG00000009677;…	ENSOCUG00000026936;ENSOCUG00000011683;ENSOCUG00000013019;ENSOCUG00000023396;ENSOCUG00000014497;ENSOCUG00000009056;ENSOCUG00000010340;ENSOCUG00000001326;ENSOCUG00000017653;ENSOCUG00000013150;ENSOCUG00000000605;ENSOCUG00000013136;ENSOCUG00000015957;ENSOCUG00000007622;ENSOCUG00000008071;ENSOCUG00000025542;ENSOCUG00000027444;ENSOCUG00000006737;ENSOCUG00000000786;ENSOCUG00000015634;ENSOCUG00000001230;…	#
ENSOCUG00000000148	GO:0005506;GO:0005829;GO:0005829;GO:0017172;GO:0046439;GO:0047800;GO:0055114;GO:0003674;GO:0005575;GO:0005622;GO:0005623;GO:0005737;GO:0005829;GO:0006520;GO:0006790;GO:0008150;GO:0016491;GO:0043167;GO:0044281;	ENSOCUG00000000488	-	#			anatomical structure formation involved in morphogenesis	GO:0048646	13	0.0132789	20	0.0151745	33	0.0143666	735	0.0109598	3.82171e-05	4.41774	ENSOCUG00000001212;ENSOCUG00000009050;ENSOCUG00000010756;ENSOCUG00000016068;ENSOCUG00000003905;ENSOCUG00000007978;ENSOCUG00000009939;ENSOCUG00000003792;ENSOCUG00000001923;ENSOCUG00000016576;ENSOCUG00000005596;ENSOCUG00000015320;ENSOCUG00000024465	ENSOCUG00000016751;ENSOCUG00000011082;ENSOCUG00000008805;ENSOCUG00000013136;ENSOCUG00000021659;ENSOCUG00000026917;ENSOCUG00000007622;ENSOCUG00000004834;ENSOCUG00000025542;ENSOCUG00000022473;ENSOCUG00000000786;ENSOCUG00000016465;ENSOCUG00000015634;ENSOCUG00000011985;ENSOCUG00000009990;ENSOCUG00000024142;ENSOCUG00000014420;ENSOCUG00000004013;ENSOCUG00000007069;ENSOCUG00000001326	#
ENSOCUG00000000171	GO:0005615;GO:0008201;GO:0010172;GO:0019221;GO:0030514;GO:0036122;GO:0038098;GO:0042803;GO:0048263;GO:0060300;	ENSOCUG00000000490	-	#			biosynthetic process	GO:0009058	56	0.0572012	52	0.0394537	108	0.0470178	3820	0.0569614	0.000546343	3.26253	ENSOCUG00000005596;ENSOCUG00000027099;ENSOCUG00000004386;ENSOCUG00000022093;ENSOCUG00000010756;ENSOCUG00000024739;ENSOCUG00000004821;ENSOCUG00000009050;ENSOCUG00000025109;ENSOCUG00000003768;ENSOCUG00000021506;ENSOCUG00000005279;ENSOCUG00000021352;ENSOCUG00000002396;ENSOCUG00000002673;ENSOCUG00000007086;ENSOCUG00000003792;ENSOCUG00000026786;ENSOCUG00000004422;ENSOCUG00000022742;ENSOCUG00000017831;…	ENSOCUG00000015076;ENSOCUG00000000793;ENSOCUG00000003858;ENSOCUG00000005767;ENSOCUG00000017653;ENSOCUG00000007069;ENSOCUG00000022791;ENSOCUG00000006667;ENSOCUG00000002339;ENSOCUG00000006878;ENSOCUG00000011683;ENSOCUG00000015877;ENSOCUG00000024833;ENSOCUG00000026384;ENSOCUG00000029663;ENSOCUG00000027648;ENSOCUG00000022473;ENSOCUG00000025542;ENSOCUG00000026727;ENSOCUG00000013136;ENSOCUG00000029357;…	#
ENSOCUG00000000360	GO:0005509;GO:0005634;GO:0005737;GO:0005886;GO:0005886;GO:0007155;GO:0007156;GO:0016020;GO:0016021;GO:0070062;GO:0003674;GO:0005575;GO:0005622;GO:0005623;GO:0005634;GO:0005737;GO:0005886;GO:0007155;GO:0008150;GO:0043167;GO:0043226;	ENSOCUG00000000605	GO:0005515;GO:0005515;GO:0005776;GO:0008104;GO:0016023;GO:0016234;GO:0017157;GO:0021549;GO:0021979;GO:0047496;GO:0048011;GO:0050769;GO:1902513;GO:1902857;	#			carbohydrate metabolic process	GO:0005975	4	0.0040858	12	0.0091047	16	0.00696561	581	0.0086635	0.163595	0.786231	ENSOCUG00000006698;ENSOCUG00000026419;ENSOCUG00000005692;ENSOCUG00000000010	ENSOCUG00000004554;ENSOCUG00000023112;ENSOCUG00000003063;ENSOCUG00000025542;ENSOCUG00000003858;ENSOCUG00000012032;ENSOCUG00000011985;ENSOCUG00000022907;ENSOCUG00000014246;ENSOCUG00000006878;ENSOCUG00000022791;ENSOCUG00000016751	#
ENSOCUG00000000370	GO:0004222;GO:0005578;GO:0006508;GO:0008237;GO:0008270;GO:0031012;GO:0003674;GO:0005575;GO:0005576;GO:0005578;GO:0008150;GO:0008233;GO:0043167;	ENSOCUG00000000629	GO:0005089;GO:0005515;GO:0005737;GO:0015630;GO:0021955;GO:0032319;GO:0035023;GO:0035556;GO:0046872;GO:0060052;GO:0003674;GO:0005575;GO:0005622;GO:0005623;GO:0005737;GO:0005856;GO:0007165;GO:0008150;GO:0043167;GO:0043226;	#			catabolic process	GO:0009056	13	0.0132789	37	0.0280728	50	0.0217675	1972	0.0294052	0.0922285	1.03514	ENSOCUG00000024196;ENSOCUG00000007620;ENSOCUG00000009279;ENSOCUG00000000585;ENSOCUG00000026992;ENSOCUG00000001212;ENSOCUG00000006698;ENSOCUG00000015681;ENSOCUG00000017409;ENSOCUG00000004422;ENSOCUG00000001030;ENSOCUG00000017958;ENSOCUG00000005357	ENSOCUG00000014931;ENSOCUG00000011858;ENSOCUG00000021867;ENSOCUG00000012696;ENSOCUG00000021520;ENSOCUG00000017653;ENSOCUG00000002483;ENSOCUG00000004691;ENSOCUG00000024783;ENSOCUG00000026540;ENSOCUG00000023409;ENSOCUG00000008071;ENSOCUG00000013891;ENSOCUG00000001353;ENSOCUG00000001114;ENSOCUG00000026304;ENSOCUG00000022473;ENSOCUG00000014246;ENSOCUG00000011497;ENSOCUG00000014432;ENSOCUG00000000786;…	#
ENSOCUG00000000568	GO:0005344;GO:0005506;GO:0005833;GO:0006810;GO:0015671;GO:0019825;GO:0020037;GO:0046872;GO:0003674;GO:0005575;GO:0005622;GO:0005623;GO:0005737;GO:0005829;GO:0006810;GO:0008150;GO:0043167;GO:0043234;	ENSOCUG00000000632	GO:0005198;GO:0005886;GO:0005923;GO:0016020;GO:0016021;GO:0030054;GO:0003674;GO:0005198;GO:0005575;GO:0005623;GO:0005886;	#			cell adhesion	GO:0007155	20	0.020429	21	0.0159332	41	0.0178494	583	0.00869332	1.55173e-11	10.8092	ENSOCUG00000005279;ENSOCUG00000016068;ENSOCUG00000001046;ENSOCUG00000011482;ENSOCUG00000005377;ENSOCUG00000022536;ENSOCUG00000006698;ENSOCUG00000022093;ENSOCUG00000005596;ENSOCUG00000000360;ENSOCUG00000007978;ENSOCUG00000003905;ENSOCUG00000011443;ENSOCUG00000009677;ENSOCUG00000001933;ENSOCUG00000024465;ENSOCUG00000003056;ENSOCUG00000007086;ENSOCUG00000003792;ENSOCUG00000002038	ENSOCUG00000021242;ENSOCUG00000022921;ENSOCUG00000009990;ENSOCUG00000000786;ENSOCUG00000016487;ENSOCUG00000001102;ENSOCUG00000022293;ENSOCUG00000016883;ENSOCUG00000008018;ENSOCUG00000026791;ENSOCUG00000026334;ENSOCUG00000007622;ENSOCUG00000010458;ENSOCUG00000022473;ENSOCUG00000011700;ENSOCUG00000011082;ENSOCUG00000008805;ENSOCUG00000015957;ENSOCUG00000013150;ENSOCUG00000012103;ENSOCUG00000021659	#
ENSOCUG00000000585	GO:0000166;GO:0005515;GO:0005525;GO:0005622;GO:0006184;GO:0007165;GO:0007264;GO:0015031;GO:0016020;GO:0003674;GO:0005575;GO:0005622;GO:0005623;GO:0006810;GO:0007165;GO:0008150;GO:0009056;GO:0034641;GO:0034655;GO:0043167;GO:0044281;	ENSOCUG00000000786	GO:0000166;GO:0001501;GO:0001568;GO:0001570;GO:0001649;GO:0004672;GO:0004713;GO:0004714;GO:0005003;GO:0005515;GO:0005515;GO:0005524;GO:0005886;GO:0005887;GO:0005925;GO:0006468;GO:0007169;GO:0008630;GO:0009986;GO:0010591;GO:0014028;GO:0016020;GO:0016021;GO:0016301;GO:0016310;GO:0016477;GO:0016740;GO:0016772;GO:0018108;GO:0021915;GO:0030182;GO:0030216;GO:0030316;GO:0031256;GO:0032863;GO:0033598;GO:…	#			cell cycle	GO:0007049	14	0.0143003	10	0.00758725	24	0.0104484	834	0.0124361	0.0740023	1.13075	ENSOCUG00000028094;ENSOCUG00000003768;ENSOCUG00000005279;ENSOCUG00000007620;ENSOCUG00000005133;ENSOCUG00000002396;ENSOCUG00000001454;ENSOCUG00000001212;ENSOCUG00000015681;ENSOCUG00000004340;ENSOCUG00000003792;ENSOCUG00000001030;ENSOCUG00000003277;ENSOCUG00000023898	ENSOCUG00000007069;ENSOCUG00000004554;ENSOCUG00000003521;ENSOCUG00000022473;ENSOCUG00000026304;ENSOCUG00000022109;ENSOCUG00000026917;ENSOCUG00000010340;ENSOCUG00000011858;ENSOCUG00000004035	#
ENSOCUG00000000664	GO:0005515;GO:0005856;GO:0005575;GO:0005622;GO:0005623;GO:0005856;GO:0043226;GO:0005856;GO:0005575;GO:0005622;GO:0005623;GO:0005856;GO:0043226;	ENSOCUG00000000793	GO:0005509;GO:0005515;GO:0005634;GO:0005634;GO:0005737;GO:0005737;GO:0005886;GO:0005886;GO:0008284;GO:0008284;GO:0010922;GO:0010922;GO:0042307;GO:0042307;GO:0045944;GO:0045944;GO:0070886;GO:0070886;GO:0071277;GO:0071277;GO:0003674;GO:0005575;GO:0005622;GO:0005623;GO:0005634;GO:0005737;GO:0005886;GO:0008150;GO:0043167;GO:0043226;	#			cell death	GO:0008219	16	0.0163432	23	0.0174507	39	0.0169787	1022	0.0152394	0.000249117	3.6036	ENSOCUG00000006698;ENSOCUG00000005091;ENSOCUG00000005596;ENSOCUG00000011746;ENSOCUG00000005279;ENSOCUG00000016068;ENSOCUG00000001454;ENSOCUG00000004821;ENSOCUG00000003056;ENSOCUG00000003792;ENSOCUG00000007086;ENSOCUG00000002038;ENSOCUG00000003905;ENSOCUG00000007620;ENSOCUG00000001212;ENSOCUG00000002902	ENSOCUG00000011858;ENSOCUG00000016287;ENSOCUG00000001230;ENSOCUG00000016465;ENSOCUG00000015877;ENSOCUG00000000786;ENSOCUG00000006986;ENSOCUG00000017791;ENSOCUG00000015076;ENSOCUG00000011985;ENSOCUG00000022907;ENSOCUG00000021659;ENSOCUG00000021669;ENSOCUG00000008823;ENSOCUG00000008805;ENSOCUG00000025542;ENSOCUG00000022473;ENSOCUG00000001158;ENSOCUG00000007470;ENSOCUG00000004834;ENSOCUG00000022109;…	#
ENSOCUG00000001030	GO:0000166;GO:0000287;GO:0000287;GO:0003924;GO:0005515;GO:0005515;GO:0005525;GO:0005622;GO:0005634;GO:0005634;GO:0006184;GO:0007067;GO:0007067;GO:0007165;GO:0007264;GO:0009898;GO:0009898;GO:0015031;GO:0016020;GO:0019003;GO:0019003;GO:0030496;GO:0030496;GO:0051233;GO:0051233;GO:0051276;GO:0051276;GO:0051310;GO:0072686;GO:0072686;GO:0003674;GO:0005575;GO:0005622;GO:0005623;GO:0005634;GO:0005856;GO:…	ENSOCUG00000000861	GO:0005515;GO:0016020;GO:0016021;GO:0070062;GO:0005575;	#			cell differentiation	GO:0030154	44	0.0449438	57	0.0432473	101	0.0439704	2110	0.031463	1.94556e-15	14.711	ENSOCUG00000022093;ENSOCUG00000026228;ENSOCUG00000005596;ENSOCUG00000005279;ENSOCUG00000022296;ENSOCUG00000021506;ENSOCUG00000003768;ENSOCUG00000001046;ENSOCUG00000010756;ENSOCUG00000009050;ENSOCUG00000024465;ENSOCUG00000004422;ENSOCUG00000002038;ENSOCUG00000007086;ENSOCUG00000007978;ENSOCUG00000012259;ENSOCUG00000004073;ENSOCUG00000008229;ENSOCUG00000001212;ENSOCUG00000002622;ENSOCUG00000012968;…	ENSOCUG00000007622;ENSOCUG00000001353;ENSOCUG00000008071;ENSOCUG00000001114;ENSOCUG00000022473;ENSOCUG00000025542;ENSOCUG00000013150;ENSOCUG00000013136;ENSOCUG00000000605;ENSOCUG00000015957;ENSOCUG00000014497;ENSOCUG00000009056;ENSOCUG00000010340;ENSOCUG00000004152;ENSOCUG00000007069;ENSOCUG00000001326;ENSOCUG00000002480;ENSOCUG00000024142;ENSOCUG00000027230;ENSOCUG00000015877;ENSOCUG00000011683;…	#
ENSOCUG00000001046	GO:0001503;GO:0001649;GO:0005576;GO:0007155;GO:0016020;GO:0030198;GO:0071363;GO:0005575;GO:0005576;GO:0007155;GO:0008150;	ENSOCUG00000001102	GO:0005178;GO:0005515;GO:0005515;GO:0005925;GO:0007156;GO:0007157;GO:0007159;GO:0007166;GO:0007411;GO:0009897;GO:0009986;GO:0009986;GO:0016020;GO:0022409;GO:0031175;GO:0033631;GO:0033691;GO:0034109;GO:0042734;GO:0042802;GO:0043195;GO:0043621;GO:0050850;GO:0003674;	#			cell division	GO:0051301	10	0.0102145	5	0.00379363	15	0.00653026	401	0.00597945	0.0228279	1.64153	ENSOCUG00000015681;ENSOCUG00000004340;ENSOCUG00000003277;ENSOCUG00000023898;ENSOCUG00000001030;ENSOCUG00000007620;ENSOCUG00000005133;ENSOCUG00000003768;ENSOCUG00000028094;ENSOCUG00000005279	ENSOCUG00000003521;ENSOCUG00000022473;ENSOCUG00000007069;ENSOCUG00000016465;ENSOCUG00000007470	#
ENSOCUG00000001188	GO:0005515;GO:0005576;GO:0005578;GO:0005578;GO:0005581;GO:0005581;GO:0005938;GO:0005938;GO:0003674;GO:0005575;GO:0005576;GO:0005578;GO:0005622;GO:0005623;GO:0005737;	ENSOCUG00000001114	GO:0000287;GO:0003810;GO:0003824;GO:0003824;GO:0003924;GO:0005509;GO:0005509;GO:0005525;GO:0005737;GO:0005737;GO:0006184;GO:0018149;GO:0019003;GO:0030216;GO:0030216;GO:0031234;GO:0031234;GO:0043163;GO:0043163;GO:0046872;GO:0051262;GO:0051262;GO:0070062;GO:0003674;GO:0003924;GO:0005575;GO:0005622;GO:0005623;GO:0005737;GO:0005886;GO:0006461;GO:0006464;GO:0008150;GO:0009056;GO:0016746;GO:0022607;GO:…	#			cell junction organization	GO:0034330	5	0.00510725	7	0.00531108	12	0.00522421	112	0.00167007	4.16134e-06	5.38077	ENSOCUG00000014625;ENSOCUG00000001933;ENSOCUG00000005279;ENSOCUG00000005596;ENSOCUG00000016576	ENSOCUG00000010458;ENSOCUG00000015957;ENSOCUG00000022473;ENSOCUG00000013150;ENSOCUG00000022921;ENSOCUG00000008805;ENSOCUG00000003049	#
ENSOCUG00000001212	GO:0000980;GO:0000980;GO:0001102;GO:0001102;GO:0001525;GO:0001525;GO:0001774;GO:0001774;GO:0001889;GO:0001889;GO:0001938;GO:0001938;GO:0003151;GO:0003151;GO:0003677;GO:0003677;GO:0003700;GO:0003713;GO:0003713;GO:0005100;GO:0005100;GO:0005515;GO:0005515;GO:0005634;GO:0005634;GO:0005634;GO:0005654;GO:0005667;GO:0005667;GO:0005719;GO:0005719;GO:0006355;GO:0006355;GO:0007179;GO:0007179;GO:0007184;GO:…	ENSOCUG00000001158	GO:0005515;GO:0005634;GO:0005634;GO:0005634;GO:0005654;GO:0005730;GO:0005730;GO:0006354;GO:0006354;GO:0006366;GO:0006366;GO:0006368;GO:0008023;GO:0010717;GO:0010717;GO:0032786;GO:0032786;GO:0035326;GO:0035326;GO:0042795;GO:0045944;GO:0045944;GO:0045944;GO:0048863;GO:0048863;GO:0050769;GO:0050769;GO:1901797;GO:1901797;GO:1902166;GO:1902166;GO:2000179;GO:2000179;GO:0003674;GO:0003677;GO:0005575;GO:…	#			cell morphogenesis	GO:0000902	16	0.0163432	18	0.0136571	34	0.0148019	716	0.0106765	9.24315e-06	5.03418	ENSOCUG00000012042;ENSOCUG00000007978;ENSOCUG00000005708;ENSOCUG00000009677;ENSOCUG00000007086;ENSOCUG00000003768;ENSOCUG00000000007;ENSOCUG00000005279;ENSOCUG00000009050;ENSOCUG00000001454;ENSOCUG00000014625;ENSOCUG00000012968;ENSOCUG00000005357;ENSOCUG00000013412;ENSOCUG00000001923;ENSOCUG00000005596	ENSOCUG00000001326;ENSOCUG00000007069;ENSOCUG00000011985;ENSOCUG00000000629;ENSOCUG00000003436;ENSOCUG00000001102;ENSOCUG00000027230;ENSOCUG00000000786;ENSOCUG00000001353;ENSOCUG00000001158;ENSOCUG00000003521;ENSOCUG00000022473;ENSOCUG00000011386;ENSOCUG00000026917;ENSOCUG00000015957;ENSOCUG00000008823;ENSOCUG00000008805;ENSOCUG00000011082	#
ENSOCUG00000001454	GO:0000086;GO:0000086;GO:0005198;GO:0005622;GO:0005622;GO:0005737;GO:0005737;GO:0005737;GO:0005882;GO:0005882;GO:0007399;GO:0007399;GO:0032091;GO:0032091;GO:0043086;GO:0043086;GO:0043524;GO:0043524;GO:0045111;GO:0045111;GO:0048858;GO:0048858;GO:0072089;GO:0072089;GO:0000902;GO:0003674;GO:0005198;GO:0005575;GO:0005622;GO:0005623;GO:0005737;GO:0005856;GO:0007049;GO:0008150;GO:0008283;GO:0043226;GO:…	ENSOCUG00000001230	GO:0001933;GO:0001937;GO:0003824;GO:0004854;GO:0004855;GO:0005506;GO:0005515;GO:0005615;GO:0006919;GO:0007595;GO:0008762;GO:0009055;GO:0009115;GO:0010629;GO:0016491;GO:0016491;GO:0016614;GO:0030856;GO:0042803;GO:0043546;GO:0043546;GO:0045602;GO:0046872;GO:0050660;GO:0051536;GO:0051537;GO:0051537;GO:0051898;GO:0055114;GO:0055114;GO:1900745;GO:1900747;GO:2000379;GO:2001213;GO:0003674;GO:0008150;GO:…	#			cell motility	GO:0048870	25	0.0255363	21	0.0159332	46	0.0200261	781	0.0116458	3.32338e-10	9.47842	ENSOCUG00000022536;ENSOCUG00000024272;ENSOCUG00000006698;ENSOCUG00000013412;ENSOCUG00000001923;ENSOCUG00000013686;ENSOCUG00000005596;ENSOCUG00000016068;ENSOCUG00000005279;ENSOCUG00000000007;ENSOCUG00000009050;ENSOCUG00000010756;ENSOCUG00000003056;ENSOCUG00000008303;ENSOCUG00000001933;ENSOCUG00000007086;ENSOCUG00000003792;ENSOCUG00000002038;ENSOCUG00000011443;ENSOCUG00000008086;ENSOCUG00000007978;…	ENSOCUG00000011082;ENSOCUG00000008805;ENSOCUG00000015957;ENSOCUG00000012103;ENSOCUG00000021659;ENSOCUG00000002562;ENSOCUG00000026917;ENSOCUG00000007622;ENSOCUG00000011386;ENSOCUG00000022473;ENSOCUG00000016487;ENSOCUG00000000786;ENSOCUG00000014246;ENSOCUG00000017791;ENSOCUG00000016883;ENSOCUG00000009056;ENSOCUG00000029348;ENSOCUG00000009990;ENSOCUG00000024142;ENSOCUG00000005634;ENSOCUG00000001326	#
ENSOCUG00000001461	GO:0001666;GO:0005506;GO:0005783;GO:0008475;GO:0016491;GO:0016705;GO:0016706;GO:0031418;GO:0055114;GO:0070062;GO:0003674;GO:0005575;GO:0005622;GO:0005623;GO:0005737;GO:0005783;GO:0008150;GO:0016491;GO:0043167;GO:0043226;	ENSOCUG00000001326	GO:0002292;GO:0002292;GO:0004872;GO:0005515;GO:0007275;GO:0007409;GO:0007409;GO:0008360;GO:0008360;GO:0010594;GO:0010594;GO:0016020;GO:0016525;GO:0016525;GO:0045063;GO:0045063;GO:0071526;GO:0071526;GO:0000902;GO:0002376;GO:0003674;GO:0005575;GO:0007165;GO:0008150;GO:0030154;GO:0048856;	#			cell proliferation	GO:0008283	28	0.0286006	31	0.0235205	59	0.0256857	1069	0.0159402	1.21121e-11	10.9168	ENSOCUG00000015681;ENSOCUG00000006698;ENSOCUG00000026228;ENSOCUG00000005596;ENSOCUG00000001923;ENSOCUG00000003768;ENSOCUG00000011500;ENSOCUG00000005279;ENSOCUG00000016068;ENSOCUG00000002396;ENSOCUG00000001454;ENSOCUG00000010756;ENSOCUG00000001933;ENSOCUG00000024465;ENSOCUG00000008303;ENSOCUG00000004340;ENSOCUG00000017845;ENSOCUG00000003056;ENSOCUG00000004422;ENSOCUG00000016771;ENSOCUG00000007086;…	ENSOCUG00000017309;ENSOCUG00000000793;ENSOCUG00000010340;ENSOCUG00000015076;ENSOCUG00000029348;ENSOCUG00000005634;ENSOCUG00000007069;ENSOCUG00000006986;ENSOCUG00000016487;ENSOCUG00000000786;ENSOCUG00000015877;ENSOCUG00000016465;ENSOCUG00000001230;ENSOCUG00000016883;ENSOCUG00000026917;ENSOCUG00000007622;ENSOCUG00000004834;ENSOCUG00000007470;ENSOCUG00000013779;ENSOCUG00000004554;ENSOCUG00000025542;…	#
ENSOCUG00000001525	GO:0004222;GO:0005576;GO:0005578;GO:0006508;GO:0008233;GO:0008237;GO:0008270;GO:0031012;GO:0003674;GO:0005575;GO:0005576;GO:0005578;GO:0008150;GO:0008233;GO:0043167;	ENSOCUG00000001353	GO:0002931;GO:0002931;GO:0004197;GO:0004221;GO:0004221;GO:0004843;GO:0005515;GO:0005622;GO:0005654;GO:0005737;GO:0005737;GO:0005829;GO:0005829;GO:0005886;GO:0006511;GO:0007409;GO:0007409;GO:0007412;GO:0007412;GO:0007628;GO:0007628;GO:0008242;GO:0008283;GO:0008283;GO:0016579;GO:0019896;GO:0019896;GO:0030424;GO:0030424;GO:0031694;GO:0042755;GO:0042755;GO:0043025;GO:0043025;GO:0043130;GO:0043407;GO:…	#			cell wall organization or biogenesis	GO:0071554	0	0	1	0.000758725	1	0.00043535	14	0.000208759	0.256643	0.59067	-	ENSOCUG00000013891	#
ENSOCUG00000001723	GO:0003676;GO:0003677;GO:0003700;GO:0003779;GO:0005634;GO:0006355;GO:0007010;GO:0008270;GO:0043565;GO:0046872;GO:0001071;GO:0003674;GO:0003677;GO:0005575;GO:0005622;GO:0005623;GO:0005634;GO:0007010;GO:0008092;GO:0008150;GO:0043167;GO:0043226;	ENSOCUG00000001405	GO:0005515;GO:0005634;GO:0005654;GO:0046982;GO:0097237;GO:0003674;	#			cell-cell signaling	GO:0007267	6	0.0061287	16	0.0121396	22	0.00957771	512	0.00763461	0.00129571	2.88749	ENSOCUG00000003768;ENSOCUG00000006698;ENSOCUG00000011500;ENSOCUG00000009050;ENSOCUG00000005596;ENSOCUG00000016576	ENSOCUG00000003063;ENSOCUG00000011742;ENSOCUG00000021520;ENSOCUG00000007069;ENSOCUG00000011985;ENSOCUG00000017309;ENSOCUG00000016465;ENSOCUG00000022473;ENSOCUG00000025542;ENSOCUG00000007545;ENSOCUG00000026917;ENSOCUG00000005827;ENSOCUG00000021669;ENSOCUG00000004222;ENSOCUG00000013292;ENSOCUG00000008823	#
ENSOCUG00000001765	GO:0005576;GO:0005615;GO:0005615;GO:0007275;GO:0030178;GO:0090090;GO:0090090;GO:0090263;GO:0090263;GO:0005575;GO:0005576;GO:0005615;GO:0008150;	ENSOCUG00000001490	GO:0002385;GO:0005515;GO:0032002;GO:0050691;GO:0051607;GO:0003674;GO:0005515;GO:0003674;	#			cellular component assembly	GO:0022607	16	0.0163432	32	0.0242792	48	0.0208968	1280	0.0190865	7.3335e-05	4.13469	ENSOCUG00000009939;ENSOCUG00000007086;ENSOCUG00000024555;ENSOCUG00000026419;ENSOCUG00000001933;ENSOCUG00000009677;ENSOCUG00000008229;ENSOCUG00000009279;ENSOCUG00000017958;ENSOCUG00000013968;ENSOCUG00000016576;ENSOCUG00000005596;ENSOCUG00000026228;ENSOCUG00000015681;ENSOCUG00000006698;ENSOCUG00000009050	ENSOCUG00000017233;ENSOCUG00000003858;ENSOCUG00000014447;ENSOCUG00000023535;ENSOCUG00000021242;ENSOCUG00000015076;ENSOCUG00000021801;ENSOCUG00000015957;ENSOCUG00000022473;ENSOCUG00000001114;ENSOCUG00000005924;ENSOCUG00000027003;ENSOCUG00000004373;ENSOCUG00000016465;ENSOCUG00000015634;ENSOCUG00000000786;ENSOCUG00000003049;ENSOCUG00000015993;ENSOCUG00000003063;ENSOCUG00000029348;ENSOCUG00000011985;…	#
ENSOCUG00000001850	GO:0005515;GO:0030502;	ENSOCUG00000001813	GO:0004053;GO:0006525;GO:0016787;GO:0016813;GO:0046872;GO:0003674;GO:0006520;GO:0008150;GO:0016810;GO:0043167;GO:0044281;GO:0000050;GO:0004053;GO:0004053;GO:0005634;GO:0005737;GO:0006525;GO:0016787;GO:0016813;GO:0046872;GO:0070062;GO:0003674;GO:0005575;GO:0005622;GO:0005623;GO:0005737;GO:0006520;GO:0008150;GO:0009058;GO:0016810;GO:0034641;GO:0043167;GO:0044281;GO:0071941;	#			cellular nitrogen compound metabolic process	GO:0034641	47	0.0480082	62	0.047041	109	0.0474532	4356	0.0649538	0.0236696	1.62581	ENSOCUG00000012259;ENSOCUG00000008229;ENSOCUG00000016984;ENSOCUG00000004073;ENSOCUG00000000104;ENSOCUG00000001212;ENSOCUG00000004340;ENSOCUG00000004422;ENSOCUG00000003792;ENSOCUG00000007086;ENSOCUG00000003277;ENSOCUG00000003768;ENSOCUG00000021506;ENSOCUG00000002396;ENSOCUG00000002673;ENSOCUG00000000585;ENSOCUG00000010756;ENSOCUG00000024739;ENSOCUG00000004821;ENSOCUG00000009050;ENSOCUG00000004386;…	ENSOCUG00000023409;ENSOCUG00000027003;ENSOCUG00000029663;ENSOCUG00000012149;ENSOCUG00000025542;ENSOCUG00000022473;ENSOCUG00000001114;ENSOCUG00000002483;ENSOCUG00000013136;ENSOCUG00000004691;ENSOCUG00000015076;ENSOCUG00000000793;ENSOCUG00000003858;ENSOCUG00000014447;ENSOCUG00000023535;ENSOCUG00000021520;ENSOCUG00000017653;ENSOCUG00000007069;ENSOCUG00000002339;ENSOCUG00000014931;ENSOCUG00000017233;…	#
ENSOCUG00000001923	GO:0001569;GO:0001666;GO:0001667;GO:0001764;GO:0003779;GO:0004871;GO:0004930;GO:0004950;GO:0005515;GO:0005515;GO:0005764;GO:0005764;GO:0005769;GO:0005769;GO:0005770;GO:0005770;GO:0005886;GO:0005886;GO:0005911;GO:0006935;GO:0007165;GO:0007186;GO:0007281;GO:0007420;GO:0008045;GO:0008354;GO:0009897;GO:0009986;GO:0009986;GO:0016020;GO:0016021;GO:0016023;GO:0016494;GO:0019722;GO:0019955;GO:0030334;GO:…	ENSOCUG00000001822	GO:0000166;GO:0003777;GO:0003777;GO:0005515;GO:0005524;GO:0005871;GO:0005871;GO:0005874;GO:0005930;GO:0007017;GO:0007017;GO:0007018;GO:0008017;GO:0008152;GO:0015630;GO:0016192;GO:0016192;GO:0030992;GO:0031503;GO:0031503;GO:0032391;GO:0036064;GO:1990075;GO:0003674;GO:0005575;GO:0005622;GO:0005623;GO:0005856;GO:0006810;GO:0008092;GO:0008150;GO:0016192;GO:0043167;GO:0043226;GO:0043234;GO:0000166;GO:…	#			cellular protein modification process	GO:0006464	27	0.0275792	41	0.0311077	68	0.0296038	2094	0.0312244	0.000193967	3.71227	ENSOCUG00000003905;ENSOCUG00000008439;ENSOCUG00000007978;ENSOCUG00000011443;ENSOCUG00000009279;ENSOCUG00000005692;ENSOCUG00000008229;ENSOCUG00000001212;ENSOCUG00000009677;ENSOCUG00000002902;ENSOCUG00000004340;ENSOCUG00000001933;ENSOCUG00000004422;ENSOCUG00000023790;ENSOCUG00000003056;ENSOCUG00000002038;ENSOCUG00000011452;ENSOCUG00000007086;ENSOCUG00000003792;ENSOCUG00000022947;ENSOCUG00000005279;…	ENSOCUG00000026830;ENSOCUG00000013150;ENSOCUG00000004691;ENSOCUG00000024783;ENSOCUG00000021158;ENSOCUG00000007545;ENSOCUG00000001114;ENSOCUG00000001353;ENSOCUG00000022473;ENSOCUG00000006878;ENSOCUG00000006667;ENSOCUG00000022791;ENSOCUG00000021867;ENSOCUG00000011858;ENSOCUG00000026281;ENSOCUG00000007737;ENSOCUG00000015076;ENSOCUG00000007069;ENSOCUG00000017653;ENSOCUG00000014749;ENSOCUG00000008823;…	#
ENSOCUG00000001933	GO:0001570;GO:0001772;GO:0001772;GO:0001772;GO:0001954;GO:0004721;GO:0004725;GO:0005161;GO:0005161;GO:0005515;GO:0005654;GO:0005886;GO:0005886;GO:0005886;GO:0005911;GO:0005911;GO:0006470;GO:0007507;GO:0007596;GO:0008013;GO:0008013;GO:0008285;GO:0008285;GO:0008285;GO:0009986;GO:0009986;GO:0010572;GO:0010642;GO:0010642;GO:0010642;GO:0010759;GO:0016311;GO:0016787;GO:0016791;GO:0019901;GO:0019901;GO:…	ENSOCUG00000002076	GO:0000209;GO:0000209;GO:0003684;GO:0004842;GO:0004842;GO:0005515;GO:0005654;GO:0006290;GO:0009411;GO:0009411;GO:0030054;GO:0031465;GO:0035518;GO:0043234;GO:0043234;GO:0051865;GO:0051865;GO:0070914;GO:0003674;GO:0005575;GO:0006464;GO:0008150;GO:0016874;GO:0043234;	#			chromosome organization	GO:0051276	6	0.0061287	9	0.00682853	15	0.00653026	596	0.00888717	0.270467	0.567885	ENSOCUG00000004340;ENSOCUG00000003768;ENSOCUG00000003277;ENSOCUG00000013968;ENSOCUG00000001030;ENSOCUG00000008229	ENSOCUG00000014447;ENSOCUG00000023535;ENSOCUG00000027003;ENSOCUG00000002076;ENSOCUG00000016465;ENSOCUG00000014442;ENSOCUG00000017233;ENSOCUG00000014422;ENSOCUG00000025918	#
ENSOCUG00000002038	GO:0001764;GO:0005515;GO:0005539;GO:0005576;GO:0008201;GO:0010811;GO:0010976;GO:0016049;GO:0019800;GO:0030198;GO:0031012;GO:0043524;GO:0003674;	ENSOCUG00000002177	GO:0005739;GO:0016023;	#			chromosome segregation	GO:0007059	4	0.0040858	0	0	4	0.0017414	124	0.00184901	0.26249	0.580888	ENSOCUG00000003277;ENSOCUG00000001030;ENSOCUG00000015681;ENSOCUG00000004340	-	#
ENSOCUG00000002132	GO:0000785;GO:0000785;GO:0003677;GO:0005515;GO:0005634;GO:0005654;GO:0006351;GO:0044822;GO:0072357;GO:0072357;GO:0003674;GO:0003677;GO:0005575;GO:0005622;GO:0005623;GO:0005634;GO:0005694;GO:0008150;GO:0009058;GO:0034641;GO:0043226;GO:0043234;	ENSOCUG00000002339	GO:0000975;GO:0000979;GO:0000982;GO:0000982;GO:0002819;GO:0003677;GO:0003700;GO:0005515;GO:0005515;GO:0006355;GO:0006366;GO:0016064;GO:0032607;GO:0032608;GO:0032727;GO:0034124;GO:0034127;GO:0045351;GO:0045893;GO:0045944;GO:0060340;GO:0001071;GO:0003674;GO:0003677;GO:0008150;	#			circulatory system process	GO:0003013	7	0.00715015	7	0.00531108	14	0.00609491	216	0.00322085	0.000199869	3.69925	ENSOCUG00000005708;ENSOCUG00000016576;ENSOCUG00000008858;ENSOCUG00000016771;ENSOCUG00000014625;ENSOCUG00000001933;ENSOCUG00000005279	ENSOCUG00000023857;ENSOCUG00000003436;ENSOCUG00000021159;ENSOCUG00000017653;ENSOCUG00000021669;ENSOCUG00000015634;ENSOCUG00000013150	#
ENSOCUG00000002203	GO:0001503;GO:0001503;GO:0005783;GO:0005783;GO:0007612;GO:0007612;GO:0008083;GO:0030282;GO:0030282;GO:0003674;GO:0005575;GO:0005622;GO:0005623;GO:0005737;GO:0005783;GO:0008150;GO:0043226;GO:0048856;GO:0050877;	ENSOCUG00000002367	GO:0005515;GO:0016020;GO:0016021;GO:0070062;GO:0003674;GO:0005575;	#			cofactor metabolic process	GO:0051186	0	0	6	0.00455235	6	0.0026121	154	0.00229635	0.105674	0.976034	-	ENSOCUG00000015195;ENSOCUG00000006667;ENSOCUG00000011683;ENSOCUG00000026188;ENSOCUG00000009679;ENSOCUG00000003858	#
ENSOCUG00000002243	GO:0001733;GO:0005794;GO:0008146;GO:0008152;GO:0009058;GO:0016021;GO:0003674;GO:0005575;GO:0005622;GO:0005623;GO:0005737;GO:0005794;GO:0008150;GO:0009058;GO:0043226;	ENSOCUG00000002379	GO:0000166;GO:0000287;GO:0004672;GO:0004674;GO:0004709;GO:0004713;GO:0005524;GO:0006468;GO:0016301;GO:0016310;GO:0016740;GO:0016772;GO:0003674;GO:0006464;GO:0008150;GO:0016301;GO:0043167;	#			cytoskeleton organization	GO:0007010	13	0.0132789	13	0.00986343	26	0.0113191	658	0.00981167	0.00162962	2.78791	ENSOCUG00000009677;ENSOCUG00000028094;ENSOCUG00000003285;ENSOCUG00000007086;ENSOCUG00000001723;ENSOCUG00000013412;ENSOCUG00000023898;ENSOCUG00000009939;ENSOCUG00000005357;ENSOCUG00000003277;ENSOCUG00000004340;ENSOCUG00000024272;ENSOCUG00000015681	ENSOCUG00000013150;ENSOCUG00000013123;ENSOCUG00000015957;ENSOCUG00000015634;ENSOCUG00000011082;ENSOCUG00000022473;ENSOCUG00000024142;ENSOCUG00000009644;ENSOCUG00000021801;ENSOCUG00000000629;ENSOCUG00000021242;ENSOCUG00000011386;ENSOCUG00000022921	#
ENSOCUG00000002396	GO:0001658;GO:0001658;GO:0001822;GO:0001822;GO:0001889;GO:0001889;GO:0001889;GO:0001892;GO:0001892;GO:0001947;GO:0001947;GO:0002133;GO:0002133;GO:0003127;GO:0003127;GO:0005102;GO:0005102;GO:0005102;GO:0005216;GO:0005244;GO:0005244;GO:0005245;GO:0005245;GO:0005248;GO:0005248;GO:0005267;GO:0005267;GO:0005509;GO:0005509;GO:0005515;GO:0005515;GO:0005737;GO:0005737;GO:0005737;GO:0005783;GO:0005789;GO:…	ENSOCUG00000002435	GO:0005344;GO:0005506;GO:0005833;GO:0006810;GO:0015671;GO:0019825;GO:0020037;GO:0046872;GO:0003674;GO:0005575;GO:0005622;GO:0005623;GO:0005737;GO:0005829;GO:0006810;GO:0008150;GO:0043167;GO:0043234;	#			developmental maturation	GO:0021700	4	0.0040858	5	0.00379363	9	0.00391815	163	0.00243055	0.00759033	2.11974	ENSOCUG00000005596;ENSOCUG00000009050;ENSOCUG00000005279;ENSOCUG00000016771	ENSOCUG00000011985;ENSOCUG00000003436;ENSOCUG00000008071;ENSOCUG00000016347;ENSOCUG00000015957	#
ENSOCUG00000002424	GO:0005576;GO:0006953;GO:0034364;GO:0035634;GO:0005575;GO:0005576;GO:0005615;GO:0006950;GO:0008150;	ENSOCUG00000002480	GO:0002376;GO:0002504;GO:0005515;GO:0005764;GO:0005886;GO:0006955;GO:0009897;GO:0016020;GO:0016021;GO:0019882;GO:0019886;GO:0034341;GO:0042605;GO:0042613;GO:0045582;GO:0048002;GO:0002376;GO:0003674;GO:0005575;GO:0005622;GO:0005623;GO:0005737;GO:0005764;GO:0005773;GO:0005886;GO:0006950;GO:0008150;GO:0043226;GO:0043234;GO:0002376;GO:0002504;GO:0005515;GO:0005515;GO:0005764;GO:0005764;GO:0005886;GO:…	#			embryo development	GO:0009790	21	0.0214505	14	0.0106222	35	0.0152373	793	0.0118247	3.16446e-05	4.4997	ENSOCUG00000005596;ENSOCUG00000016576;ENSOCUG00000012339;ENSOCUG00000006462;ENSOCUG00000000171;ENSOCUG00000015320;ENSOCUG00000006698;ENSOCUG00000015681;ENSOCUG00000014625;ENSOCUG00000010756;ENSOCUG00000003768;ENSOCUG00000005279;ENSOCUG00000002396;ENSOCUG00000007086;ENSOCUG00000024465;ENSOCUG00000004340;ENSOCUG00000004073;ENSOCUG00000027804;ENSOCUG00000009677;ENSOCUG00000003905;ENSOCUG00000007620	ENSOCUG00000008805;ENSOCUG00000026936;ENSOCUG00000000786;ENSOCUG00000016465;ENSOCUG00000016655;ENSOCUG00000026917;ENSOCUG00000007470;ENSOCUG00000015076;ENSOCUG00000007069;ENSOCUG00000004013;ENSOCUG00000021159;ENSOCUG00000022473;ENSOCUG00000009990;ENSOCUG00000024142	#
ENSOCUG00000002553	-	ENSOCUG00000002483	GO:0000166;GO:0005525;GO:0005622;GO:0006184;GO:0007165;GO:0007264;GO:0015031;GO:0016020;GO:0003674;GO:0005575;GO:0005622;GO:0005623;GO:0006810;GO:0007165;GO:0008150;GO:0009056;GO:0034641;GO:0034655;GO:0043167;GO:0044281;GO:0000166;GO:0005525;GO:0005622;GO:0006184;GO:0007165;GO:0007264;GO:0015031;GO:0016020;GO:0003674;GO:0005575;GO:0005622;GO:0005623;GO:0006810;GO:0007165;GO:0008150;GO:0009056;GO:…	#			extracellular matrix organization	GO:0030198	10	0.0102145	2	0.00151745	12	0.00522421	146	0.00217706	6.10836e-05	4.21408	ENSOCUG00000015020;ENSOCUG00000002038;ENSOCUG00000005596;ENSOCUG00000022093;ENSOCUG00000006698;ENSOCUG00000011482;ENSOCUG00000011443;ENSOCUG00000001046;ENSOCUG00000003905;ENSOCUG00000005279	ENSOCUG00000016487;ENSOCUG00000008071	#
ENSOCUG00000002622	GO:0002244;GO:0005198;GO:0005622;GO:0005622;GO:0005882;GO:0045095;GO:0070062;GO:0003674;GO:0005198;GO:0005575;GO:0005622;GO:0005623;GO:0005856;GO:0043226;GO:0043234;	ENSOCUG00000002485	GO:0002344;GO:0002344;GO:0002376;GO:0002504;GO:0002579;GO:0002579;GO:0002827;GO:0002827;GO:0005515;GO:0005515;GO:0005622;GO:0005622;GO:0005769;GO:0005769;GO:0005771;GO:0005771;GO:0005794;GO:0005794;GO:0005886;GO:0005886;GO:0006955;GO:0006955;GO:0008134;GO:0008134;GO:0009897;GO:0009897;GO:0015643;GO:0015643;GO:0016020;GO:0016021;GO:0016021;GO:0019882;GO:0019882;GO:0019886;GO:0019886;GO:0031625;GO:…	#			generation of precursor metabolites and energy	GO:0006091	0	0	4	0.0030349	4	0.0017414	177	0.00263931	0.509865	0.292545	-	ENSOCUG00000004554;ENSOCUG00000003858;ENSOCUG00000003063;ENSOCUG00000015076	#
ENSOCUG00000002673	GO:0005515;GO:0005737;GO:0005737;GO:0005886;GO:0005886;GO:0005925;GO:0006605;GO:0007165;GO:0008179;GO:0008179;GO:0010739;GO:0010739;GO:0030819;GO:0030819;GO:0051018;GO:0090036;GO:0003674;GO:0005575;GO:0005622;GO:0005623;GO:0005737;GO:0005886;GO:0006605;GO:0006810;GO:0007165;GO:0008150;GO:0019899;	ENSOCUG00000002562	GO:0005515;GO:0005518;GO:0005615;GO:0005737;GO:0008285;GO:0030336;GO:0003674;	#			growth	GO:0040007	14	0.0143003	12	0.0091047	26	0.0113191	591	0.00881261	0.00034307	3.46462	ENSOCUG00000007978;ENSOCUG00000005279;ENSOCUG00000003905;ENSOCUG00000011443;ENSOCUG00000016984;ENSOCUG00000005708;ENSOCUG00000002902;ENSOCUG00000006698;ENSOCUG00000001933;ENSOCUG00000016771;ENSOCUG00000014625;ENSOCUG00000003792;ENSOCUG00000012339;ENSOCUG00000002038	ENSOCUG00000021159;ENSOCUG00000004152;ENSOCUG00000007069;ENSOCUG00000010340;ENSOCUG00000003436;ENSOCUG00000015076;ENSOCUG00000026917;ENSOCUG00000011985;ENSOCUG00000011386;ENSOCUG00000021659;ENSOCUG00000016487;ENSOCUG00000017791	#
ENSOCUG00000002818	GO:0005515;GO:0005634;GO:0005730;GO:0005730;GO:0005737;GO:0005575;GO:0005622;GO:0005623;GO:0005634;GO:0005730;GO:0043226;	ENSOCUG00000002607	GO:0005198;GO:0005615;GO:0005882;GO:0045095;GO:0003674;GO:0005198;GO:0005575;GO:0005622;GO:0005623;GO:0005856;GO:0043226;GO:0043234;	#			helicase activity	GO:0004386	0	0	0	0	0	0	148	0.00220688	1	0	-	-	#
ENSOCUG00000002902	GO:0000188;GO:0000188;GO:0001933;GO:0001933;GO:0004721;GO:0004721;GO:0004725;GO:0005515;GO:0005737;GO:0006470;GO:0006470;GO:0008138;GO:0016311;GO:0016787;GO:0016791;GO:0017017;GO:0035335;GO:0035335;GO:0043065;GO:0043065;GO:0051409;GO:0051409;GO:0060420;GO:0060420;GO:0070373;GO:0003674;GO:0006464;GO:0006950;GO:0008150;GO:0016791;	ENSOCUG00000002715	GO:0000287;GO:0003824;GO:0008152;GO:0016020;GO:0030976;GO:0003674;GO:0008150;GO:0043167;	#			homeostatic process	GO:0042592	13	0.0132789	23	0.0174507	36	0.0156726	868	0.0129431	8.7033e-05	4.06032	ENSOCUG00000016576;ENSOCUG00000007086;ENSOCUG00000006698;ENSOCUG00000016771;ENSOCUG00000026419;ENSOCUG00000003056;ENSOCUG00000008858;ENSOCUG00000004821;ENSOCUG00000005708;ENSOCUG00000005279;ENSOCUG00000002396;ENSOCUG00000009279;ENSOCUG00000007620	ENSOCUG00000016287;ENSOCUG00000016465;ENSOCUG00000011683;ENSOCUG00000015877;ENSOCUG00000011742;ENSOCUG00000027981;ENSOCUG00000021159;ENSOCUG00000015076;ENSOCUG00000009056;ENSOCUG00000011985;ENSOCUG00000017271;ENSOCUG00000004635;ENSOCUG00000015957;ENSOCUG00000021659;ENSOCUG00000021669;ENSOCUG00000008823;ENSOCUG00000008805;ENSOCUG00000025542;ENSOCUG00000004554;ENSOCUG00000007545;ENSOCUG00000013779;…	#
ENSOCUG00000002956	GO:0005515;GO:0005515;GO:0070062;GO:0003674;	ENSOCUG00000002771	-	#			hydrolase activity, acting on carbon-nitrogen	GO:0016810	0	0	3	0.00227618	3	0.00130605	88	0.0013122	0.280668	0.551808	-	ENSOCUG00000012403;ENSOCUG00000023532;ENSOCUG00000001813	#
ENSOCUG00000003056	GO:0000166;GO:0001782;GO:0001782;GO:0001817;GO:0001817;GO:0001933;GO:0001933;GO:0002431;GO:0002431;GO:0002513;GO:0002513;GO:0002576;GO:0002576;GO:0002762;GO:0002762;GO:0002768;GO:0002768;GO:0002774;GO:0002774;GO:0002902;GO:0002902;GO:0004672;GO:0004672;GO:0004713;GO:0004713;GO:0005515;GO:0005515;GO:0005524;GO:0005634;GO:0005634;GO:0005737;GO:0005737;GO:0005794;GO:0005886;GO:0005886;GO:0005886;GO:…	ENSOCUG00000002824	GO:0005515;GO:0005622;GO:0006810;GO:0046872;GO:0003674;GO:0005575;GO:0005622;GO:0005623;GO:0006810;GO:0008150;GO:0043167;	#			hydrolase activity, acting on glycosyl bonds	GO:0016798	0	0	1	0.000758725	1	0.00043535	108	0.00161043	0.898987	0.0462466	-	ENSOCUG00000013891	#
ENSOCUG00000003277	GO:0000070;GO:0000070;GO:0000281;GO:0000281;GO:0005634;GO:0005634;GO:0005730;GO:0005730;GO:0005730;GO:0005737;GO:0005737;GO:0005876;GO:0005876;GO:0007076;GO:0007076;GO:0008017;GO:0008017;GO:0040001;GO:0040001;GO:0044822;GO:0045840;GO:0045840;GO:0003674;GO:0005575;GO:0005622;GO:0005623;GO:0005634;GO:0005730;GO:0005737;GO:0005856;GO:0006259;GO:0007010;GO:0007049;GO:0007059;GO:0007067;GO:0008092;GO:…	ENSOCUG00000002830	GO:0005515;GO:0005925;GO:0005925;GO:0008104;GO:0008104;GO:0003674;GO:0005575;GO:0008150;	#			immune system process	GO:0002376	27	0.0275792	27	0.0204856	54	0.0235089	1216	0.0181322	1.72072e-07	6.76429	ENSOCUG00000001212;ENSOCUG00000017831;ENSOCUG00000004073;ENSOCUG00000012042;ENSOCUG00000012259;ENSOCUG00000008439;ENSOCUG00000022947;ENSOCUG00000007086;ENSOCUG00000014282;ENSOCUG00000003792;ENSOCUG00000003056;ENSOCUG00000001933;ENSOCUG00000009906;ENSOCUG00000005377;ENSOCUG00000016068;ENSOCUG00000003768;ENSOCUG00000021506;ENSOCUG00000005279;ENSOCUG00000016476;ENSOCUG00000006999;ENSOCUG00000013412;…	ENSOCUG00000007039;ENSOCUG00000008823;ENSOCUG00000013136;ENSOCUG00000022907;ENSOCUG00000029328;ENSOCUG00000007470;ENSOCUG00000026917;ENSOCUG00000029663;ENSOCUG00000027003;ENSOCUG00000001490;ENSOCUG00000012307;ENSOCUG00000022473;ENSOCUG00000000049;ENSOCUG00000013779;ENSOCUG00000002339;ENSOCUG00000011683;ENSOCUG00000011497;ENSOCUG00000000786;ENSOCUG00000014432;ENSOCUG00000004197;ENSOCUG00000006986;…	#
ENSOCUG00000003285	GO:0005488;GO:0005515;GO:0005515;GO:0005737;GO:0005737;GO:0005856;GO:0005886;GO:0005886;GO:0006909;GO:0006909;GO:0006911;GO:0006911;GO:0006928;GO:0006928;GO:0016020;GO:0016601;GO:0016601;GO:0017124;GO:0017124;GO:0030029;GO:0030029;GO:0030036;GO:0030036;GO:0003674;GO:0005575;GO:0005622;GO:0005623;GO:0005737;GO:0005856;GO:0005886;GO:0006810;GO:0007010;GO:0007165;GO:0008150;GO:0016192;GO:0043226;GO:…	ENSOCUG00000002898	GO:0005509;GO:0005515;GO:0005925;GO:0070062;GO:0003674;GO:0043167;	#			isomerase activity	GO:0016853	1	0.00102145	4	0.0030349	5	0.00217675	148	0.00220688	0.199891	0.699207	ENSOCUG00000000010	ENSOCUG00000009056;ENSOCUG00000021143;ENSOCUG00000012631;ENSOCUG00000004554	#
ENSOCUG00000003351	GO:0005794;GO:0070062;	ENSOCUG00000003049	GO:0005515;GO:0005515;GO:0030056;GO:0030056;GO:0031581;	#			kinase activity	GO:0016301	19	0.0194076	21	0.0159332	40	0.017414	1026	0.015299	0.000133435	3.87473	ENSOCUG00000003905;ENSOCUG00000007978;ENSOCUG00000011443;ENSOCUG00000008229;ENSOCUG00000002902;ENSOCUG00000004340;ENSOCUG00000001933;ENSOCUG00000023790;ENSOCUG00000003056;ENSOCUG00000007086;ENSOCUG00000003792;ENSOCUG00000022947;ENSOCUG00000005279;ENSOCUG00000002396;ENSOCUG00000009050;ENSOCUG00000027154;ENSOCUG00000006698;ENSOCUG00000000010;ENSOCUG00000005596	ENSOCUG00000026281;ENSOCUG00000007737;ENSOCUG00000007069;ENSOCUG00000017653;ENSOCUG00000023112;ENSOCUG00000000786;ENSOCUG00000016487;ENSOCUG00000011858;ENSOCUG00000021158;ENSOCUG00000026917;ENSOCUG00000004554;ENSOCUG00000007545;ENSOCUG00000001353;ENSOCUG00000017209;ENSOCUG00000012032;ENSOCUG00000008823;ENSOCUG00000015195;ENSOCUG00000011082;ENSOCUG00000021669;ENSOCUG00000002379;ENSOCUG00000024783	#
ENSOCUG00000003641	GO:0001674;GO:0003677;GO:0003700;GO:0005634;GO:0006355;GO:0007611;GO:0008270;GO:0008585;GO:0021879;GO:0021884;GO:0042475;GO:0043565;GO:0046872;GO:0001071;GO:0003674;GO:0003677;GO:0005575;GO:0005622;GO:0005623;GO:0005634;GO:0008150;GO:0043167;GO:0043226;	ENSOCUG00000003063	GO:0005739;GO:0005739;GO:0006006;GO:0006006;GO:0006083;GO:0006083;GO:0006105;GO:0006105;GO:0006536;GO:0006536;GO:0006541;GO:0006541;GO:0006650;GO:0006650;GO:0006678;GO:0006678;GO:0006681;GO:0006681;GO:0006749;GO:0006749;GO:0007417;GO:0008152;GO:0009013;GO:0009448;GO:0009448;GO:0009450;GO:0009791;GO:0009791;GO:0016491;GO:0016620;GO:0022904;GO:0022904;GO:0042135;GO:0042135;GO:0046459;GO:0046459;GO:…	#			ligase activity	GO:0016874	0	0	5	0.00379363	5	0.00217675	362	0.00539791	0.878639	0.0561895	-	ENSOCUG00000017141;ENSOCUG00000002076;ENSOCUG00000024783;ENSOCUG00000021867;ENSOCUG00000024977	#
ENSOCUG00000003660	-	ENSOCUG00000003405	GO:0016020;GO:0016021;GO:0055085;GO:0005575;GO:0006810;GO:0008150;GO:0055085;	#			lipid metabolic process	GO:0006629	10	0.0102145	19	0.0144158	29	0.0126252	752	0.0112133	0.00130143	2.88558	ENSOCUG00000007620;ENSOCUG00000009279;ENSOCUG00000005692;ENSOCUG00000003905;ENSOCUG00000003056;ENSOCUG00000016771;ENSOCUG00000006698;ENSOCUG00000022947;ENSOCUG00000007086;ENSOCUG00000000010	ENSOCUG00000017141;ENSOCUG00000021659;ENSOCUG00000011463;ENSOCUG00000024977;ENSOCUG00000022907;ENSOCUG00000008823;ENSOCUG00000009679;ENSOCUG00000004554;ENSOCUG00000022473;ENSOCUG00000026540;ENSOCUG00000023550;ENSOCUG00000015168;ENSOCUG00000017791;ENSOCUG00000013994;ENSOCUG00000005767;ENSOCUG00000003063;ENSOCUG00000004004;ENSOCUG00000012696;ENSOCUG00000010340	#
ENSOCUG00000003665	-	ENSOCUG00000003436	GO:0002028;GO:0003779;GO:0003779;GO:0005515;GO:0005515;GO:0005543;GO:0007409;GO:0007605;GO:0007628;GO:0009566;GO:0010459;GO:0016020;GO:0016020;GO:0019226;GO:0019902;GO:0019902;GO:0021952;GO:0022414;GO:0030424;GO:0030507;GO:0030534;GO:0033135;GO:0033270;GO:0034613;GO:0040018;GO:0043025;GO:0043194;GO:0043203;GO:0045162;GO:0061337;GO:0070062;GO:0070852;GO:0003674;GO:0005575;GO:0008092;GO:0008289;GO:…	#			locomotion	GO:0040011	26	0.0265577	23	0.0174507	49	0.0213322	910	0.0135693	1.738e-09	8.75995	ENSOCUG00000008086;ENSOCUG00000011443;ENSOCUG00000003905;ENSOCUG00000007978;ENSOCUG00000012259;ENSOCUG00000009677;ENSOCUG00000005708;ENSOCUG00000017831;ENSOCUG00000003056;ENSOCUG00000008303;ENSOCUG00000001933;ENSOCUG00000002038;ENSOCUG00000007086;ENSOCUG00000003792;ENSOCUG00000016068;ENSOCUG00000000007;ENSOCUG00000005279;ENSOCUG00000009050;ENSOCUG00000010756;ENSOCUG00000022536;ENSOCUG00000024272;…	ENSOCUG00000000786;ENSOCUG00000016487;ENSOCUG00000017791;ENSOCUG00000014246;ENSOCUG00000016883;ENSOCUG00000001102;ENSOCUG00000029348;ENSOCUG00000009056;ENSOCUG00000024142;ENSOCUG00000009990;ENSOCUG00000001326;ENSOCUG00000005634;ENSOCUG00000011082;ENSOCUG00000008805;ENSOCUG00000012103;ENSOCUG00000015957;ENSOCUG00000021659;ENSOCUG00000002562;ENSOCUG00000011386;ENSOCUG00000007622;ENSOCUG00000026917;…	#
ENSOCUG00000003768	GO:0001135;GO:0001974;GO:0005102;GO:0005125;GO:0005125;GO:0005146;GO:0005146;GO:0005576;GO:0005737;GO:0006366;GO:0006955;GO:0007566;GO:0008083;GO:0008083;GO:0008284;GO:0008284;GO:0008285;GO:0019827;GO:0030324;GO:0033138;GO:0033141;GO:0042503;GO:0042511;GO:0042517;GO:0043410;GO:0045595;GO:0045651;GO:0045835;GO:0045944;GO:0045944;GO:0046697;GO:0046888;GO:0048286;GO:0048644;GO:0048666;GO:0048711;GO:…	ENSOCUG00000003521	GO:0000281;GO:0000281;GO:0005200;GO:0005200;GO:0005515;GO:0005515;GO:0005923;GO:0005923;GO:0007009;GO:0007009;GO:0007165;GO:0007409;GO:0007409;GO:0007411;GO:0007411;GO:0009925;GO:0009925;GO:0014704;GO:0014704;GO:0016020;GO:0016020;GO:0016323;GO:0016323;GO:0016328;GO:0016328;GO:0019228;GO:0019228;GO:0030424;GO:0030424;GO:0033268;GO:0033268;GO:0033270;GO:0033270;GO:0042383;GO:0042383;GO:0043001;GO:…	#			lyase activity	GO:0016829	0	0	6	0.00455235	6	0.0026121	260	0.00387695	0.463456	0.333991	-	ENSOCUG00000017653;ENSOCUG00000004554;ENSOCUG00000011742;ENSOCUG00000017791;ENSOCUG00000006667;ENSOCUG00000015076	#
ENSOCUG00000003792	GO:0000187;GO:0001786;GO:0001937;GO:0001937;GO:0001953;GO:0001968;GO:0002040;GO:0002544;GO:0002581;GO:0002605;GO:0003151;GO:0003197;GO:0003417;GO:0005178;GO:0005509;GO:0005515;GO:0005576;GO:0005577;GO:0005615;GO:0005615;GO:0006954;GO:0006955;GO:0007050;GO:0007155;GO:0008201;GO:0009749;GO:0009897;GO:0009986;GO:0010595;GO:0010596;GO:0010748;GO:0010751;GO:0010754;GO:0010757;GO:0010763;GO:0010811;GO:…	ENSOCUG00000003679	GO:0004364;GO:0005515;GO:0005737;GO:0006749;GO:0008152;GO:0016740;GO:0003674;GO:0005575;GO:0005622;GO:0005623;GO:0005737;GO:0006520;GO:0006790;GO:0008150;GO:0016765;GO:0034641;GO:0044281;	#			membrane organization	GO:0061024	15	0.0153218	17	0.0128983	32	0.0139312	650	0.00969238	8.25782e-06	5.08313	ENSOCUG00000008858;ENSOCUG00000006698;ENSOCUG00000015681;ENSOCUG00000006999;ENSOCUG00000005596;ENSOCUG00000001923;ENSOCUG00000003792;ENSOCUG00000003958;ENSOCUG00000016068;ENSOCUG00000003285;ENSOCUG00000009279;ENSOCUG00000008086;ENSOCUG00000005279;ENSOCUG00000009677;ENSOCUG00000009050	ENSOCUG00000000786;ENSOCUG00000015877;ENSOCUG00000014432;ENSOCUG00000011683;ENSOCUG00000011985;ENSOCUG00000003436;ENSOCUG00000009990;ENSOCUG00000014420;ENSOCUG00000008823;ENSOCUG00000024222;ENSOCUG00000008805;ENSOCUG00000016751;ENSOCUG00000021669;ENSOCUG00000015957;ENSOCUG00000004691;ENSOCUG00000022473;ENSOCUG00000003521	#
ENSOCUG00000003824	GO:0008152;GO:0016758;GO:0032580;GO:0003674;GO:0005575;GO:0005622;GO:0005623;GO:0005737;GO:0005794;GO:0008150;GO:0016757;GO:0043226;	ENSOCUG00000003806	GO:0007517;GO:0007528;	#			methyltransferase activity	GO:0008168	1	0.00102145	4	0.0030349	5	0.00217675	150	0.0022367	0.207271	0.683461	ENSOCUG00000008229	ENSOCUG00000012149;ENSOCUG00000024898;ENSOCUG00000004554;ENSOCUG00000003858	#
ENSOCUG00000003866	GO:0005201;GO:0005509;GO:0005515;GO:0005578;GO:0003674;GO:0005198;GO:0005575;GO:0005576;GO:0005578;GO:0043167;GO:0001501;GO:0001501;GO:0001527;GO:0001527;GO:0005201;GO:0005509;GO:0005515;GO:0005515;GO:0005578;GO:0005604;GO:0005604;GO:0005615;GO:0005615;GO:0007507;GO:0007507;GO:0031012;GO:0031012;GO:0070062;GO:0003674;GO:0005198;GO:0005575;GO:0005576;GO:0005578;GO:0005615;GO:0008150;GO:0043167;GO:…	ENSOCUG00000003858	GO:0005515;GO:0005737;GO:0005737;GO:0005977;GO:0005977;GO:0006111;GO:0006111;GO:0006555;GO:0006555;GO:0006730;GO:0006730;GO:0008152;GO:0008168;GO:0016594;GO:0016594;GO:0016594;GO:0016740;GO:0017174;GO:0017174;GO:0032259;GO:0046500;GO:0046500;GO:0046500;GO:0051289;GO:0051289;GO:0051289;GO:0003674;GO:0005575;GO:0005622;GO:0005623;GO:0005737;GO:0005975;GO:0006091;GO:0006461;GO:0006520;GO:0006790;GO:…	#			mitochondrion organization	GO:0007005	1	0.00102145	2	0.00151745	3	0.00130605	197	0.00293754	0.784396	0.105465	ENSOCUG00000004821	ENSOCUG00000015076;ENSOCUG00000008823	#
ENSOCUG00000003905	GO:0001558;GO:0001649;GO:0001649;GO:0001934;GO:0001934;GO:0002041;GO:0002041;GO:0003181;GO:0003181;GO:0003278;GO:0003278;GO:0003281;GO:0003281;GO:0005178;GO:0005178;GO:0005515;GO:0005520;GO:0005576;GO:0007155;GO:0007155;GO:0010518;GO:0010518;GO:0010811;GO:0010811;GO:0016337;GO:0016337;GO:0030198;GO:0030198;GO:0030335;GO:0030335;GO:0030335;GO:0030513;GO:0030513;GO:0031012;GO:0031012;GO:0033690;GO:…	ENSOCUG00000004004	GO:0006505;GO:0006886;GO:0016788;GO:0003674;GO:0006629;GO:0006810;GO:0008150;	#			mitosis	GO:0007067	5	0.00510725	1	0.000758725	6	0.0026121	173	0.00257966	0.156635	0.805111	ENSOCUG00000004340;ENSOCUG00000015681;ENSOCUG00000023898;ENSOCUG00000003277;ENSOCUG00000001030	ENSOCUG00000007069	#
ENSOCUG00000003958	GO:0005044;GO:0005515;GO:0006898;GO:0016020;GO:0003674;GO:0005575;GO:0006810;GO:0008150;GO:0016192;	ENSOCUG00000004008	-	#			mRNA processing	GO:0006397	1	0.00102145	0	0	1	0.00043535	173	0.00257966	0.974711	0.0111242	ENSOCUG00000004422	-	#
ENSOCUG00000004073	GO:0000122;GO:0001076;GO:0001649;GO:0003682;GO:0003700;GO:0005515;GO:0005515;GO:0005634;GO:0005634;GO:0005667;GO:0005737;GO:0005737;GO:0006357;GO:0006366;GO:0008285;GO:0010838;GO:0019904;GO:0032720;GO:0043392;GO:0044092;GO:0045638;GO:0045668;GO:0045668;GO:0045668;GO:0046983;GO:0048701;GO:0060325;GO:0061303;GO:0003674;GO:0005575;GO:0005622;GO:0005623;GO:0005634;GO:0005737;GO:0008150;GO:0043226;	ENSOCUG00000004013	GO:0005515;GO:0005515;GO:0005604;GO:0005604;GO:0005610;GO:0005610;GO:0035987;GO:0050873;GO:0050873;GO:0003674;GO:0005575;GO:0005576;GO:0005578;GO:0008150;GO:0030154;GO:0043234;	#			neurological system process	GO:0050877	9	0.00919305	17	0.0128983	26	0.0113191	1400	0.0208759	0.766072	0.11573	ENSOCUG00000009050;ENSOCUG00000002203;ENSOCUG00000027804;ENSOCUG00000003641;ENSOCUG00000012042;ENSOCUG00000001923;ENSOCUG00000007086;ENSOCUG00000004422;ENSOCUG00000007052	ENSOCUG00000015076;ENSOCUG00000003436;ENSOCUG00000026281;ENSOCUG00000017309;ENSOCUG00000011985;ENSOCUG00000003063;ENSOCUG00000009990;ENSOCUG00000021520;ENSOCUG00000027230;ENSOCUG00000015149;ENSOCUG00000001353;ENSOCUG00000003521;ENSOCUG00000013292;ENSOCUG00000004222;ENSOCUG00000008805;ENSOCUG00000008823;ENSOCUG00000015957	#
ENSOCUG00000004185	GO:0005515;GO:0044822;GO:0003674;	ENSOCUG00000004035	GO:0000975;GO:0003677;GO:0003677;GO:0003700;GO:0003700;GO:0005515;GO:0005737;GO:0005737;GO:0006355;GO:0007050;GO:0007050;GO:0008285;GO:0008285;GO:0008285;GO:0030216;GO:0030216;GO:0043588;GO:0043588;GO:0043616;GO:0043616;GO:0045893;GO:0045893;GO:0048468;GO:0048468;GO:0060644;GO:0060644;GO:0070062;GO:0001071;GO:0003674;GO:0003677;GO:0005575;GO:0005622;GO:0005623;GO:0005737;GO:0007049;GO:0008150;GO:…	#			nitrogen cycle metabolic process	GO:0071941	0	0	1	0.000758725	1	0.00043535	4	5.96454e-05	0.0812295	1.09029	-	ENSOCUG00000001813	#
ENSOCUG00000004205	GO:0003824;GO:0004252;GO:0005739;GO:0005739;GO:0006508;GO:0003674;GO:0005575;GO:0005622;GO:0005623;GO:0005737;GO:0005739;GO:0008150;GO:0008233;GO:0043226;	ENSOCUG00000004152	GO:0005576;GO:0008083;GO:0040007;GO:0045444;GO:0003674;GO:0005575;GO:0005576;GO:0008150;GO:0040007;	#			nucleic acid binding transcription factor activity	GO:0001071	22	0.0224719	12	0.0091047	34	0.0148019	1043	0.0155525	0.00759004	2.11976	ENSOCUG00000000104;ENSOCUG00000004073;ENSOCUG00000004231;ENSOCUG00000001212;ENSOCUG00000008439;ENSOCUG00000012259;ENSOCUG00000011443;ENSOCUG00000007086;ENSOCUG00000014074;ENSOCUG00000009906;ENSOCUG00000003641;ENSOCUG00000009050;ENSOCUG00000016476;ENSOCUG00000021506;ENSOCUG00000011746;ENSOCUG00000012339;ENSOCUG00000001723;ENSOCUG00000023019;ENSOCUG00000005596;ENSOCUG00000012968;ENSOCUG00000006698;…	ENSOCUG00000013779;ENSOCUG00000025542;ENSOCUG00000024492;ENSOCUG00000022109;ENSOCUG00000029663;ENSOCUG00000007470;ENSOCUG00000016465;ENSOCUG00000022907;ENSOCUG00000013136;ENSOCUG00000015877;ENSOCUG00000004035;ENSOCUG00000002339	#
ENSOCUG00000004231	GO:0000122;GO:0000980;GO:0001206;GO:0003677;GO:0003677;GO:0003700;GO:0003700;GO:0005515;GO:0005634;GO:0005634;GO:0006355;GO:0006355;GO:0043565;GO:0001071;GO:0003674;GO:0003677;GO:0005575;GO:0005622;GO:0005623;GO:0005634;GO:0008150;GO:0043226;	ENSOCUG00000004197	GO:0005515;GO:0009615;GO:0050688;GO:0071357;GO:0071360;GO:0002376;GO:0003674;GO:0006950;GO:0008150;	#			nucleotidyltransferase activity	GO:0016779	1	0.00102145	2	0.00151745	3	0.00130605	125	0.00186392	0.488484	0.311149	ENSOCUG00000005596	ENSOCUG00000006667;ENSOCUG00000015195	#
ENSOCUG00000004340	GO:0000079;GO:0000922;GO:0000922;GO:0000942;GO:0000942;GO:0001701;GO:0001701;GO:0005113;GO:0005113;GO:0005515;GO:0005515;GO:0005634;GO:0005634;GO:0005737;GO:0005737;GO:0005813;GO:0005813;GO:0006468;GO:0006468;GO:0007049;GO:0007080;GO:0007080;GO:0016020;GO:0016020;GO:0016301;GO:0016301;GO:0019901;GO:0043148;GO:0043148;GO:0045787;GO:0045931;GO:0045931;GO:0048146;GO:0051301;GO:0051726;GO:0051987;GO:…	ENSOCUG00000004222	GO:0005215;GO:0005515;GO:0006810;GO:0015101;GO:0015101;GO:0015101;GO:0015651;GO:0015651;GO:0015651;GO:0015695;GO:0015695;GO:0015695;GO:0015697;GO:0015697;GO:0015697;GO:0015844;GO:0015844;GO:0016020;GO:0016021;GO:0022857;GO:0032098;GO:0032098;GO:0051608;GO:0051608;GO:0051615;GO:0051615;GO:0055085;GO:0003674;GO:0005575;GO:0006810;GO:0007267;GO:0008150;GO:0022857;GO:0050877;GO:0055085;	#			oxidoreductase activity	GO:0016491	6	0.0061287	17	0.0128983	23	0.0100131	723	0.0107809	0.0321314	1.49307	ENSOCUG00000007620;ENSOCUG00000016771;ENSOCUG00000006698;ENSOCUG00000026383;ENSOCUG00000000148;ENSOCUG00000001461	ENSOCUG00000014307;ENSOCUG00000020957;ENSOCUG00000011463;ENSOCUG00000021659;ENSOCUG00000016655;ENSOCUG00000012307;ENSOCUG00000026540;ENSOCUG00000004554;ENSOCUG00000011201;ENSOCUG00000014246;ENSOCUG00000017744;ENSOCUG00000001230;ENSOCUG00000020989;ENSOCUG00000010340;ENSOCUG00000015076;ENSOCUG00000029646;ENSOCUG00000003063	#
ENSOCUG00000004386	GO:0000978;GO:0001077;GO:0001816;GO:0003677;GO:0003700;GO:0005515;GO:0005634;GO:0005634;GO:0005737;GO:0006355;GO:0010628;GO:0045944;GO:0045944;GO:0070884;GO:0001071;GO:0003674;GO:0005575;GO:0005622;GO:0005623;GO:0005634;GO:0008150;GO:0043226;	ENSOCUG00000004238	GO:0016021;GO:0005575;	#			phosphatase activity	GO:0016791	5	0.00510725	5	0.00379363	10	0.0043535	293	0.00436903	0.0903568	1.04404	ENSOCUG00000006698;ENSOCUG00000001933;ENSOCUG00000005279;ENSOCUG00000002902;ENSOCUG00000023898	ENSOCUG00000021669;ENSOCUG00000016347;ENSOCUG00000022921;ENSOCUG00000021158;ENSOCUG00000000793	#
ENSOCUG00000004422	GO:0005515;GO:0005515;GO:0006479;GO:0006479;GO:0006974;GO:0006974;GO:0008285;GO:0008285;GO:0008306;GO:0008306;GO:0009952;GO:0009952;GO:0017148;GO:0017148;GO:0021542;GO:0021542;GO:0021954;GO:0021954;GO:0031175;GO:0031175;GO:0035914;GO:0035914;GO:0060213;GO:0060213;GO:0070062;GO:2000178;GO:2000178;GO:0006464;GO:0006950;GO:0008150;GO:0030154;GO:0048856;GO:0050877;	ENSOCUG00000004369	GO:0070062;	#			photosynthesis	GO:0015979	0	0	0	0	0	0	7	0.000104379	1	0	-	-	#
ENSOCUG00000004424	-	ENSOCUG00000004373	GO:0043461;GO:0006461;GO:0008150;GO:0022607;GO:0065003;GO:0043461;GO:0006461;GO:0008150;GO:0022607;GO:0065003;	#			pigmentation	GO:0043473	1	0.00102145	0	0	1	0.00043535	63	0.000939415	0.737106	0.13247	ENSOCUG00000007086	-	#
ENSOCUG00000004821	GO:0005622;GO:0005622;GO:0043065;GO:0043065;GO:0045893;GO:0045893;GO:0051901;GO:0051901;GO:0090200;GO:0090200;GO:0097190;GO:0097191;GO:0097191;GO:0097193;GO:0097193;GO:0005575;GO:0005622;GO:0005623;GO:0007165;GO:0008150;GO:0008219;	ENSOCUG00000004554	GO:0008152;GO:0008168;GO:0032259;GO:0003674;GO:0008150;GO:0008168;GO:0000122;GO:0000122;GO:0003677;GO:0003677;GO:0005515;GO:0005634;GO:0005634;GO:0005667;GO:0005667;GO:0005737;GO:0005737;GO:0008134;GO:0008134;GO:0008134;GO:0008284;GO:0008284;GO:0010255;GO:0010255;GO:0033137;GO:0033137;GO:0042593;GO:0042593;GO:0045723;GO:0045723;GO:0045821;GO:0045821;GO:0045821;GO:0045892;GO:0045892;GO:0045893;GO:…	#			plasma membrane organization	GO:0007009	4	0.0040858	8	0.0060698	12	0.00522421	139	0.00207268	3.77258e-05	4.42336	ENSOCUG00000001923;ENSOCUG00000009677;ENSOCUG00000005279;ENSOCUG00000008086	ENSOCUG00000003521;ENSOCUG00000009990;ENSOCUG00000022473;ENSOCUG00000008823;ENSOCUG00000008805;ENSOCUG00000016751;ENSOCUG00000011683;ENSOCUG00000000786	#
ENSOCUG00000004900	GO:0005515;GO:0005634;GO:0005737;GO:0005739;GO:0005884;GO:0005886;GO:0005925;GO:0015629;GO:0003674;	ENSOCUG00000004635	GO:0003097;GO:0003097;GO:0005215;GO:0005372;GO:0005372;GO:0005794;GO:0005886;GO:0005886;GO:0005886;GO:0006810;GO:0006833;GO:0006833;GO:0006833;GO:0015168;GO:0015168;GO:0015250;GO:0015250;GO:0015250;GO:0015793;GO:0015793;GO:0016020;GO:0016020;GO:0016021;GO:0016323;GO:0016324;GO:0030659;GO:0031410;GO:0031410;GO:0042631;GO:0042631;GO:0055037;GO:0055037;GO:0070062;GO:0071280;GO:0071280;GO:0071288;GO:…	#			protein binding transcription factor activity	GO:0000988	6	0.0061287	4	0.0030349	10	0.0043535	305	0.00454796	0.109828	0.959287	ENSOCUG00000014074;ENSOCUG00000003768;ENSOCUG00000005377;ENSOCUG00000004073;ENSOCUG00000009906;ENSOCUG00000001212	ENSOCUG00000022473;ENSOCUG00000025542;ENSOCUG00000016465;ENSOCUG00000026384	#
ENSOCUG00000005091	GO:0002020;GO:0002020;GO:0002448;GO:0002448;GO:0004867;GO:0004867;GO:0005515;GO:0005615;GO:0005615;GO:0005634;GO:0005634;GO:0005737;GO:0005737;GO:0005829;GO:0005829;GO:0006955;GO:0006955;GO:0010951;GO:0016020;GO:0043027;GO:0043027;GO:0043066;GO:0043066;GO:0043154;GO:0043154;GO:0070062;GO:0071391;GO:0071391;GO:0002376;GO:0003674;GO:0005575;GO:0005576;GO:0005615;GO:0005622;GO:0005623;GO:0005634;GO:…	ENSOCUG00000004691	GO:0001934;GO:0005886;GO:0005886;GO:0009986;GO:0016021;GO:0031346;GO:0042995;GO:0043088;GO:0048550;GO:0070062;GO:0071914;GO:0071914;GO:2001287;GO:0005575;GO:0005576;GO:0005623;GO:0005886;GO:0043226;	#			protein folding	GO:0006457	0	0	2	0.00151745	2	0.000870701	129	0.00192356	0.75603	0.121461	-	ENSOCUG00000012631;ENSOCUG00000009056	#
ENSOCUG00000005133	GO:0000775;GO:0000793;GO:0005515;GO:0005634;GO:0005634;GO:0005730;GO:0005730;GO:0005737;GO:0007126;GO:0008022;GO:0008283;GO:0016020;GO:0044822;GO:0003674;	ENSOCUG00000004727	GO:0005254;GO:0005254;GO:0005886;GO:0005886;GO:0006821;GO:0006821;GO:0015276;GO:0015276;GO:0034220;GO:0034220;GO:1902476;GO:1902476;GO:0003674;GO:0005575;GO:0005623;GO:0005886;GO:0006810;GO:0008150;GO:0022857;GO:0055085;	#			protein maturation	GO:0051604	17	0.0173647	29	0.022003	46	0.0200261	1065	0.0158806	3.1398e-06	5.5031	ENSOCUG00000008303;ENSOCUG00000008858;ENSOCUG00000001525;ENSOCUG00000003792;ENSOCUG00000008781;ENSOCUG00000003905;ENSOCUG00000000370;ENSOCUG00000004205;ENSOCUG00000006698;ENSOCUG00000005091;ENSOCUG00000016758;ENSOCUG00000011746;ENSOCUG00000017958;ENSOCUG00000006999;ENSOCUG00000006462;ENSOCUG00000009507;ENSOCUG00000016068	ENSOCUG00000020975;ENSOCUG00000027981;ENSOCUG00000023708;ENSOCUG00000021262;ENSOCUG00000023396;ENSOCUG00000015076;ENSOCUG00000012696;ENSOCUG00000001230;ENSOCUG00000016465;ENSOCUG00000011858;ENSOCUG00000021867;ENSOCUG00000008071;ENSOCUG00000029657;ENSOCUG00000026304;ENSOCUG00000001353;ENSOCUG00000010681;ENSOCUG00000000049;ENSOCUG00000025542;ENSOCUG00000004834;ENSOCUG00000026917;ENSOCUG00000009821;…	#
ENSOCUG00000005244	-	ENSOCUG00000004834	GO:0001938;GO:0001938;GO:0002020;GO:0002020;GO:0002541;GO:0002541;GO:0005515;GO:0005543;GO:0005543;GO:0005615;GO:0005615;GO:0006919;GO:0006919;GO:0007596;GO:0007599;GO:0009986;GO:0009986;GO:0010641;GO:0010641;GO:0016020;GO:0016021;GO:0031012;GO:0031012;GO:0045766;GO:0045766;GO:0051897;GO:0051897;GO:0070062;GO:0003674;GO:0005575;GO:0005576;GO:0005615;GO:0005623;GO:0006950;GO:0008150;GO:0008219;GO:…	#			reproduction	GO:0000003	9	0.00919305	14	0.0106222	23	0.0100131	639	0.00952835	0.00885422	2.05285	ENSOCUG00000008858;ENSOCUG00000015681;ENSOCUG00000007086;ENSOCUG00000001923;ENSOCUG00000007620;ENSOCUG00000005133;ENSOCUG00000003768;ENSOCUG00000011500;ENSOCUG00000003641	ENSOCUG00000016465;ENSOCUG00000001230;ENSOCUG00000015168;ENSOCUG00000027444;ENSOCUG00000017791;ENSOCUG00000024222;ENSOCUG00000016487;ENSOCUG00000017653;ENSOCUG00000007069;ENSOCUG00000022473;ENSOCUG00000026917;ENSOCUG00000009056;ENSOCUG00000007470;ENSOCUG00000003436	#
ENSOCUG00000005279	GO:0000902;GO:0001501;GO:0001502;GO:0001540;GO:0001568;GO:0001654;GO:0001666;GO:0001837;GO:0001974;GO:0003007;GO:0003179;GO:0004702;GO:0005102;GO:0005114;GO:0005160;GO:0005160;GO:0005515;GO:0005515;GO:0005576;GO:0005576;GO:0005615;GO:0005615;GO:0005768;GO:0006468;GO:0007050;GO:0007179;GO:0007184;GO:0007411;GO:0007435;GO:0007507;GO:0008083;GO:0008219;GO:0008284;GO:0008285;GO:0008347;GO:0009611;GO:…	ENSOCUG00000004894	-	#			response to stress	GO:0006950	27	0.0275792	40	0.030349	67	0.0291685	1709	0.0254835	5.2214e-07	6.28221	ENSOCUG00000002396;ENSOCUG00000016068;ENSOCUG00000005279;ENSOCUG00000021506;ENSOCUG00000011500;ENSOCUG00000009050;ENSOCUG00000006698;ENSOCUG00000006462;ENSOCUG00000001461;ENSOCUG00000001923;ENSOCUG00000009279;ENSOCUG00000012042;ENSOCUG00000003905;ENSOCUG00000002424;ENSOCUG00000001212;ENSOCUG00000002902;ENSOCUG00000017831;ENSOCUG00000004422;ENSOCUG00000016771;ENSOCUG00000003056;ENSOCUG00000001933;…	ENSOCUG00000026917;ENSOCUG00000001490;ENSOCUG00000001158;ENSOCUG00000014298;ENSOCUG00000014307;ENSOCUG00000008823;ENSOCUG00000021659;ENSOCUG00000002076;ENSOCUG00000004635;ENSOCUG00000011985;ENSOCUG00000026188;ENSOCUG00000027981;ENSOCUG00000004197;ENSOCUG00000011497;ENSOCUG00000016487;ENSOCUG00000000786;ENSOCUG00000002485;ENSOCUG00000016465;ENSOCUG00000001230;ENSOCUG00000024046;ENSOCUG00000016287;…	#
ENSOCUG00000005357	GO:0000166;GO:0005515;GO:0005525;GO:0005622;GO:0006184;GO:0007165;GO:0007264;GO:0007266;GO:0007266;GO:0008360;GO:0008360;GO:0015031;GO:0016020;GO:0030036;GO:0030036;GO:0030036;GO:0061299;GO:0061299;GO:0070062;GO:0003674;GO:0005575;GO:0005622;GO:0005623;GO:0006810;GO:0007010;GO:0007165;GO:0008150;GO:0009056;GO:0034641;GO:0034655;GO:0043167;GO:0044281;GO:0048856;	ENSOCUG00000004985	GO:0008152;GO:0016747;GO:0003674;GO:0008150;GO:0016746;	#			ribosome biogenesis	GO:0042254	0	0	0	0	0	0	87	0.00129729	1	0	-	-	#
ENSOCUG00000005377	GO:0002102;GO:0002102;GO:0002102;GO:0003712;GO:0003712;GO:0003712;GO:0005515;GO:0005515;GO:0005634;GO:0005634;GO:0005634;GO:0005737;GO:0005886;GO:0005925;GO:0005925;GO:0005925;GO:0007162;GO:0008270;GO:0016020;GO:0033628;GO:0033628;GO:0046872;GO:0050859;GO:0050859;GO:0050859;GO:2001141;GO:0000988;GO:0003674;GO:0005575;GO:0005622;GO:0005623;GO:0005634;GO:0005856;GO:0008150;GO:0043167;GO:0043226;GO:…	ENSOCUG00000005311	GO:0005515;	#			secondary metabolic process	GO:0019748	0	0	1	0.000758725	1	0.00043535	21	0.000313138	0.359135	0.444743	-	ENSOCUG00000017744	#
ENSOCUG00000005596	GO:0000902;GO:0000902;GO:0001525;GO:0001525;GO:0001658;GO:0001658;GO:0002042;GO:0002042;GO:0002092;GO:0002092;GO:0003257;GO:0003257;GO:0003337;GO:0003337;GO:0005515;GO:0005615;GO:0005615;GO:0007165;GO:0007165;GO:0007171;GO:0007267;GO:0007267;GO:0008284;GO:0008284;GO:0009887;GO:0009887;GO:0009954;GO:0009954;GO:0009986;GO:0009986;GO:0010717;GO:0010717;GO:0030199;GO:0030199;GO:0030296;GO:0030297;GO:…	ENSOCUG00000005321	GO:0005515;GO:0005887;GO:0016192;GO:0030133;GO:0003674;	#			signal transduction	GO:0007165	52	0.0531154	59	0.0447648	111	0.0483239	4092	0.0610173	0.00196375	2.70691	ENSOCUG00000005279;ENSOCUG00000021506;ENSOCUG00000003768;ENSOCUG00000002396;ENSOCUG00000002673;ENSOCUG00000016068;ENSOCUG00000000585;ENSOCUG00000010756;ENSOCUG00000009050;ENSOCUG00000004821;ENSOCUG00000004386;ENSOCUG00000026228;ENSOCUG00000005596;ENSOCUG00000001765;ENSOCUG00000005357;ENSOCUG00000009203;ENSOCUG00000007978;ENSOCUG00000012259;ENSOCUG00000016984;ENSOCUG00000017831;ENSOCUG00000001212;…	ENSOCUG00000024783;ENSOCUG00000005827;ENSOCUG00000004691;ENSOCUG00000000605;ENSOCUG00000015957;ENSOCUG00000002483;ENSOCUG00000001353;ENSOCUG00000025542;ENSOCUG00000022473;ENSOCUG00000007545;ENSOCUG00000008018;ENSOCUG00000023409;ENSOCUG00000021158;ENSOCUG00000004834;ENSOCUG00000007622;ENSOCUG00000029663;ENSOCUG00000015696;ENSOCUG00000011858;ENSOCUG00000001102;ENSOCUG00000011683;ENSOCUG00000015877;…	#
ENSOCUG00000005708	GO:0001886;GO:0003421;GO:0005179;GO:0005576;GO:0005615;GO:0005615;GO:0005634;GO:0005737;GO:0006874;GO:0010596;GO:0030336;GO:0035988;GO:0044070;GO:0051926;GO:0060348;GO:0086004;GO:0090280;GO:1903403;GO:0003674;GO:0005575;GO:0005576;GO:0005615;	ENSOCUG00000005634	GO:0000166;GO:0003924;GO:0005515;GO:0005515;GO:0005525;GO:0005622;GO:0005634;GO:0005737;GO:0006184;GO:0006886;GO:0006913;GO:0007165;GO:0007264;GO:0008284;GO:0008284;GO:0010634;GO:0015031;GO:0016020;GO:0031143;GO:0031143;GO:0031268;GO:0031268;GO:0031410;GO:0031410;GO:0031489;GO:0060627;GO:0070062;GO:0003674;GO:0003924;GO:0005575;GO:0005622;GO:0005623;GO:0005634;GO:0005737;GO:0006810;GO:0006913;GO:…	#			small molecule metabolic process	GO:0044281	20	0.020429	40	0.030349	60	0.026121	2008	0.029942	0.00337665	2.47151	ENSOCUG00000022947;ENSOCUG00000002038;ENSOCUG00000001030;ENSOCUG00000000148;ENSOCUG00000003792;ENSOCUG00000016771;ENSOCUG00000026419;ENSOCUG00000001212;ENSOCUG00000017831;ENSOCUG00000009279;ENSOCUG00000007620;ENSOCUG00000005357;ENSOCUG00000000010;ENSOCUG00000006698;ENSOCUG00000015681;ENSOCUG00000027154;ENSOCUG00000026992;ENSOCUG00000000585;ENSOCUG00000002673;ENSOCUG00000002396	ENSOCUG00000010340;ENSOCUG00000015076;ENSOCUG00000017653;ENSOCUG00000021520;ENSOCUG00000003858;ENSOCUG00000011742;ENSOCUG00000014931;ENSOCUG00000023550;ENSOCUG00000026540;ENSOCUG00000023409;ENSOCUG00000022473;ENSOCUG00000001114;ENSOCUG00000002483;ENSOCUG00000011463;ENSOCUG00000004691;ENSOCUG00000011985;ENSOCUG00000003679;ENSOCUG00000007765;ENSOCUG00000000629;ENSOCUG00000026188;ENSOCUG00000005634;…	#
ENSOCUG00000005755	-	ENSOCUG00000005767	GO:0003824;GO:0004421;GO:0005739;GO:0005739;GO:0005743;GO:0005743;GO:0008152;GO:0008299;GO:0003674;GO:0005575;GO:0005622;GO:0005623;GO:0005737;GO:0005739;GO:0006629;GO:0008150;GO:0009058;GO:0016746;GO:0043226;	#			sulfur compound metabolic process	GO:0006790	2	0.0020429	5	0.00379363	7	0.00304745	117	0.00174463	0.0117157	1.93123	ENSOCUG00000002038;ENSOCUG00000000148	ENSOCUG00000003858;ENSOCUG00000003063;ENSOCUG00000017653;ENSOCUG00000011985;ENSOCUG00000003679	#
ENSOCUG00000005885	GO:0005515;GO:0003674;	ENSOCUG00000005827	GO:0005509;GO:0005515;GO:0005578;GO:0005615;GO:0007179;GO:0030162;GO:0031012;GO:0046879;GO:0050431;GO:0070062;GO:0003674;GO:0043167;	#			symbiosis, encompassing mutualism through parasitism	GO:0044403	3	0.00306435	3	0.00227618	6	0.0026121	152	0.00226653	0.10089	0.99615	ENSOCUG00000001212;ENSOCUG00000008086;ENSOCUG00000006698	ENSOCUG00000027981;ENSOCUG00000029328;ENSOCUG00000016287	#
ENSOCUG00000006034	-	ENSOCUG00000005907	GO:0005737;GO:0018149;GO:0005575;GO:0005622;GO:0005623;GO:0005737;GO:0006464;GO:0008150;GO:0005737;GO:0018149;GO:0005575;GO:0005622;GO:0005623;GO:0005737;GO:0006464;GO:0008150;GO:0005737;GO:0018149;GO:0005575;GO:0005622;GO:0005623;GO:0005737;GO:0006464;GO:0008150;	#			transferase activity, transferring acyl groups	GO:0016746	1	0.00102145	6	0.00455235	7	0.00304745	217	0.00323576	0.172166	0.764054	ENSOCUG00000011452	ENSOCUG00000026540;ENSOCUG00000014246;ENSOCUG00000015109;ENSOCUG00000001114;ENSOCUG00000005767;ENSOCUG00000004985	#
ENSOCUG00000006443	GO:0044822;	ENSOCUG00000005924	GO:0001939;GO:0005215;GO:0005355;GO:0005355;GO:0005515;GO:0005515;GO:0005622;GO:0005737;GO:0005737;GO:0005829;GO:0005886;GO:0005886;GO:0005887;GO:0006461;GO:0006461;GO:0006810;GO:0015758;GO:0015758;GO:0015758;GO:0016020;GO:0016020;GO:0016021;GO:0016323;GO:0022857;GO:0022891;GO:0030496;GO:0030496;GO:0030864;GO:0030864;GO:0031982;GO:0033300;GO:0042149;GO:0042802;GO:0042802;GO:0043621;GO:0043621;GO:…	#			transferase activity, transferring alkyl or aryl	GO:0016765	0	0	2	0.00151745	2	0.000870701	45	0.000671011	0.243021	0.614357	-	ENSOCUG00000024443;ENSOCUG00000003679	#
ENSOCUG00000006462	GO:0001701;GO:0009897;GO:0045916;GO:0005575;GO:0005623;GO:0005886;GO:0008150;GO:0009790;GO:0048856;	ENSOCUG00000005933	GO:0003824;GO:0005739;GO:0005739;GO:0008152;GO:0003674;GO:0005575;GO:0005622;GO:0005623;GO:0005737;GO:0005739;GO:0008150;GO:0043226;	#			transferase activity, transferring glycosyl groups	GO:0016757	2	0.0020429	3	0.00227618	5	0.00217675	250	0.00372784	0.603659	0.219208	ENSOCUG00000003824;ENSOCUG00000005692	ENSOCUG00000026188;ENSOCUG00000006878;ENSOCUG00000022791	#
ENSOCUG00000006500	GO:0005215;GO:0005452;GO:0005515;GO:0005515;GO:0006810;GO:0006814;GO:0006820;GO:0008509;GO:0008510;GO:0015701;GO:0016020;GO:0016021;GO:0016323;GO:0035725;GO:0070062;GO:0003674;GO:0005575;GO:0006810;GO:0008150;GO:0022857;	ENSOCUG00000006361	-	#			translation	GO:0006412	11	0.011236	8	0.0060698	19	0.00827166	605	0.00902137	0.0535266	1.27143	ENSOCUG00000021352;ENSOCUG00000026992;ENSOCUG00000023274;ENSOCUG00000025109;ENSOCUG00000025799;ENSOCUG00000027099;ENSOCUG00000006698;ENSOCUG00000004422;ENSOCUG00000022742;ENSOCUG00000003792;ENSOCUG00000026786	ENSOCUG00000027082;ENSOCUG00000026727;ENSOCUG00000027459;ENSOCUG00000027648;ENSOCUG00000024676;ENSOCUG00000024833;ENSOCUG00000029357;ENSOCUG00000022888	#
ENSOCUG00000006698	GO:0000060;GO:0000060;GO:0000122;GO:0000122;GO:0000122;GO:0000165;GO:0000165;GO:0000185;GO:0000185;GO:0000187;GO:0000187;GO:0001819;GO:0001819;GO:0001891;GO:0001891;GO:0001932;GO:0001932;GO:0001934;GO:0001934;GO:0002020;GO:0002020;GO:0002020;GO:0002439;GO:0002439;GO:0002740;GO:0002740;GO:0002876;GO:0002876;GO:0002925;GO:0002925;GO:0005125;GO:0005125;GO:0005125;GO:0005164;GO:0005164;GO:0005515;GO:…	ENSOCUG00000006667	GO:0003824;GO:0006777;GO:0019008;GO:0032324;GO:0032324;GO:0046872;GO:0051536;GO:0051539;GO:0061597;GO:0003674;GO:0005575;GO:0005623;GO:0008150;GO:0009058;GO:0043167;GO:0043234;GO:0051186;	#			transport	GO:0006810	30	0.0306435	57	0.0432473	87	0.0378755	2719	0.040544	3.69797e-05	4.43204	ENSOCUG00000006999;ENSOCUG00000005357;ENSOCUG00000003958;ENSOCUG00000016576;ENSOCUG00000005596;ENSOCUG00000017409;ENSOCUG00000015681;ENSOCUG00000006698;ENSOCUG00000009050;ENSOCUG00000006500;ENSOCUG00000000585;ENSOCUG00000002673;ENSOCUG00000002396;ENSOCUG00000016068;ENSOCUG00000005279;ENSOCUG00000000422;ENSOCUG00000016476;ENSOCUG00000003768;ENSOCUG00000000568;ENSOCUG00000022947;ENSOCUG00000001030;…	ENSOCUG00000005321;ENSOCUG00000004554;ENSOCUG00000007722;ENSOCUG00000003521;ENSOCUG00000010458;ENSOCUG00000002435;ENSOCUG00000026917;ENSOCUG00000023857;ENSOCUG00000011386;ENSOCUG00000016130;ENSOCUG00000023425;ENSOCUG00000024334;ENSOCUG00000021669;ENSOCUG00000004635;ENSOCUG00000023494;ENSOCUG00000001822;ENSOCUG00000014298;ENSOCUG00000008823;ENSOCUG00000008805;ENSOCUG00000016751;ENSOCUG00000005634;…	#
ENSOCUG00000006752	GO:0003824;GO:0005783;GO:0005783;GO:0008152;GO:0010883;GO:0010883;GO:0032526;GO:0032526;GO:0070062;GO:0003674;GO:0005575;GO:0005622;GO:0005623;GO:0005737;GO:0005783;GO:0008150;GO:0043226;	ENSOCUG00000006737	GO:0008152;GO:0016787;GO:0030855;GO:0003674;GO:0008150;	#			transposition	GO:0032196	0	0	0	0	0	0	3	4.47341e-05	1	0	-	-	#
ENSOCUG00000006999	GO:0003824;GO:0004252;GO:0005576;GO:0006508;GO:0006956;GO:0008233;GO:0008236;GO:0016787;GO:0070062;GO:2000427;GO:0002376;GO:0003674;GO:0005575;GO:0005576;GO:0008150;GO:0008233;	ENSOCUG00000006745	GO:0005328;GO:0005332;GO:0005887;GO:0006810;GO:0006836;GO:0015293;GO:0015812;GO:0016020;GO:0016021;GO:0055085;GO:0003674;GO:0005575;GO:0005623;GO:0005886;GO:0006810;GO:0008150;GO:0022857;GO:0055085;	#		Cellular Component	cellular component	GO:0005575	122	0.184569	181	0.178325	303	0.180788	10774	0.184543	1.44337e-12	11.8406	ENSOCUG00000024272;ENSOCUG00000005091;ENSOCUG00000000664;ENSOCUG00000001765;ENSOCUG00000005596;ENSOCUG00000003958;ENSOCUG00000017958;ENSOCUG00000021506;ENSOCUG00000005279;ENSOCUG00000009507;ENSOCUG00000016068;ENSOCUG00000002818;ENSOCUG00000002396;ENSOCUG00000010756;ENSOCUG00000000585;ENSOCUG00000024739;ENSOCUG00000004821;ENSOCUG00000007052;ENSOCUG00000001525;ENSOCUG00000000148;ENSOCUG00000002038;…	ENSOCUG00000029357;ENSOCUG00000002824;ENSOCUG00000000049;ENSOCUG00000029657;ENSOCUG00000022473;ENSOCUG00000027648;ENSOCUG00000008018;ENSOCUG00000012149;ENSOCUG00000006878;ENSOCUG00000015877;ENSOCUG00000006667;ENSOCUG00000002830;ENSOCUG00000006745;ENSOCUG00000014447;ENSOCUG00000024142;ENSOCUG00000004152;ENSOCUG00000023535;ENSOCUG00000015076;ENSOCUG00000021242;ENSOCUG00000022921;ENSOCUG00000017141;…	#
ENSOCUG00000007052	GO:0001515;GO:0001662;GO:0001964;GO:0002118;GO:0005515;GO:0005576;GO:0007218;GO:0007626;GO:0019233;GO:0003674;GO:0005575;GO:0005576;GO:0007165;GO:0008150;	ENSOCUG00000006826	-	#			cell	GO:0005623	105	0.15885	171	0.168473	276	0.164678	10579	0.181203	4.93803e-07	6.30645	ENSOCUG00000003277;ENSOCUG00000008781;ENSOCUG00000026786;ENSOCUG00000023898;ENSOCUG00000007086;ENSOCUG00000003792;ENSOCUG00000022742;ENSOCUG00000024465;ENSOCUG00000004340;ENSOCUG00000025799;ENSOCUG00000016984;ENSOCUG00000008229;ENSOCUG00000004205;ENSOCUG00000004073;ENSOCUG00000005692;ENSOCUG00000007978;ENSOCUG00000012259;ENSOCUG00000005357;ENSOCUG00000000360;ENSOCUG00000016576;ENSOCUG00000013968;…	ENSOCUG00000016271;ENSOCUG00000001102;ENSOCUG00000022774;ENSOCUG00000013079;ENSOCUG00000007069;ENSOCUG00000002480;ENSOCUG00000005767;ENSOCUG00000011742;ENSOCUG00000029328;ENSOCUG00000013123;ENSOCUG00000026830;ENSOCUG00000007545;ENSOCUG00000026727;ENSOCUG00000009679;ENSOCUG00000001114;ENSOCUG00000001353;ENSOCUG00000005924;ENSOCUG00000029663;ENSOCUG00000000078;ENSOCUG00000004834;ENSOCUG00000026791;…	#
ENSOCUG00000007086	GO:0000166;GO:0000187;GO:0000187;GO:0001541;GO:0001541;GO:0002020;GO:0002020;GO:0002318;GO:0002318;GO:0002320;GO:0002320;GO:0002327;GO:0002327;GO:0002371;GO:0002371;GO:0002551;GO:0002551;GO:0002573;GO:0002573;GO:0004672;GO:0004713;GO:0004714;GO:0005020;GO:0005020;GO:0005515;GO:0005515;GO:0005524;GO:0005615;GO:0005615;GO:0005634;GO:0005737;GO:0005911;GO:0006468;GO:0006468;GO:0006687;GO:0006687;GO:…	ENSOCUG00000006878	GO:0006486;GO:0016021;GO:0016758;GO:0031227;GO:0003674;GO:0005575;GO:0005622;GO:0005623;GO:0005737;GO:0005783;GO:0005975;GO:0006464;GO:0008150;GO:0009058;GO:0016757;GO:0043226;	#			cytoplasm	GO:0005737	60	0.0907716	103	0.101478	163	0.0972554	6152	0.105375	0.00033954	3.46911	ENSOCUG00000005692;ENSOCUG00000025799;ENSOCUG00000016984;ENSOCUG00000004205;ENSOCUG00000004073;ENSOCUG00000022742;ENSOCUG00000004340;ENSOCUG00000026786;ENSOCUG00000003277;ENSOCUG00000008781;ENSOCUG00000023898;ENSOCUG00000000568;ENSOCUG00000007086;ENSOCUG00000000148;ENSOCUG00000003792;ENSOCUG00000021352;ENSOCUG00000002818;ENSOCUG00000002673;ENSOCUG00000002396;ENSOCUG00000004900;ENSOCUG00000003768;…	ENSOCUG00000011201;ENSOCUG00000004554;ENSOCUG00000009821;ENSOCUG00000016130;ENSOCUG00000011386;ENSOCUG00000012307;ENSOCUG00000001822;ENSOCUG00000004635;ENSOCUG00000005907;ENSOCUG00000017421;ENSOCUG00000021669;ENSOCUG00000024334;ENSOCUG00000015109;ENSOCUG00000001813;ENSOCUG00000021297;ENSOCUG00000008805;ENSOCUG00000027459;ENSOCUG00000015993;ENSOCUG00000026229;ENSOCUG00000020975;ENSOCUG00000021159;…	#
ENSOCUG00000007510	-	ENSOCUG00000006910	-	#			cytosol	GO:0005829	5	0.0075643	15	0.0147783	20	0.0119332	679	0.0116303	0.0809661	1.0917	ENSOCUG00000005091;ENSOCUG00000000148;ENSOCUG00000016984;ENSOCUG00000000568;ENSOCUG00000025109	ENSOCUG00000026917;ENSOCUG00000010340;ENSOCUG00000015076;ENSOCUG00000026188;ENSOCUG00000017653;ENSOCUG00000011742;ENSOCUG00000002435;ENSOCUG00000008071;ENSOCUG00000001353;ENSOCUG00000005924;ENSOCUG00000024833;ENSOCUG00000021659;ENSOCUG00000021669;ENSOCUG00000016271;ENSOCUG00000016883	#
ENSOCUG00000007620	GO:0001709;GO:0001709;GO:0001972;GO:0001972;GO:0004497;GO:0005506;GO:0005737;GO:0007140;GO:0007140;GO:0007283;GO:0007283;GO:0008401;GO:0009954;GO:0009954;GO:0010628;GO:0010628;GO:0016491;GO:0016705;GO:0020037;GO:0030326;GO:0030326;GO:0034653;GO:0043587;GO:0043587;GO:0046872;GO:0048384;GO:0048384;GO:0048387;GO:0055114;GO:0060349;GO:0060349;GO:0061436;GO:0070268;GO:0071300;GO:0071300;GO:2001037;GO:…	ENSOCUG00000006974	GO:0005509;GO:0003674;GO:0043167;	#			external encapsulating structure	GO:0030312	0	0	0	0	0	0	4	6.85143e-05	1	0	-	-	#
ENSOCUG00000007685	GO:0070062;	ENSOCUG00000006986	GO:0003779;GO:0008285;GO:0043065;GO:0045654;GO:0051014;GO:0070062;GO:0003674;GO:0008092;	#			extracellular region	GO:0005576	63	0.0953101	83	0.0817734	146	0.0871122	2743	0.0469837	1.59748e-27	26.7966	ENSOCUG00000003351;ENSOCUG00000025109;ENSOCUG00000009050;ENSOCUG00000003768;ENSOCUG00000022296;ENSOCUG00000005279;ENSOCUG00000009507;ENSOCUG00000016068;ENSOCUG00000001046;ENSOCUG00000002396;ENSOCUG00000005596;ENSOCUG00000001765;ENSOCUG00000017958;ENSOCUG00000005357;ENSOCUG00000000360;ENSOCUG00000022536;ENSOCUG00000005091;ENSOCUG00000006752;ENSOCUG00000022093;ENSOCUG00000007685;ENSOCUG00000000370;…	ENSOCUG00000029263;ENSOCUG00000010340;ENSOCUG00000004369;ENSOCUG00000023396;ENSOCUG00000014497;ENSOCUG00000005827;ENSOCUG00000013150;ENSOCUG00000004691;ENSOCUG00000024783;ENSOCUG00000015957;ENSOCUG00000016573;ENSOCUG00000000861;ENSOCUG00000013292;ENSOCUG00000010681;ENSOCUG00000008071;ENSOCUG00000026304;ENSOCUG00000000195;ENSOCUG00000002367;ENSOCUG00000007622;ENSOCUG00000027003;ENSOCUG00000016287;…	#
ENSOCUG00000007978	GO:0001525;GO:0001755;GO:0001755;GO:0001764;GO:0005021;GO:0005515;GO:0007155;GO:0007411;GO:0007411;GO:0007507;GO:0007507;GO:0016020;GO:0017154;GO:0017154;GO:0021612;GO:0021649;GO:0021675;GO:0021675;GO:0021828;GO:0030424;GO:0030424;GO:0036486;GO:0038084;GO:0046872;GO:0048846;GO:0048846;GO:0050919;GO:0050919;GO:0061549;GO:0061549;GO:0061551;GO:0061552;GO:0097374;GO:0097490;GO:0097490;GO:0097491;GO:…	ENSOCUG00000007039	GO:0004866;GO:0005515;GO:0005576;GO:0005615;GO:0006954;GO:0006956;GO:0010951;GO:0002376;GO:0003674;GO:0005575;GO:0005576;GO:0005615;GO:0006950;GO:0008150;GO:0030234;	#			extracellular space	GO:0005615	20	0.0302572	24	0.0236453	44	0.026253	689	0.0118016	6.41507e-11	10.1928	ENSOCUG00000009050;ENSOCUG00000016068;ENSOCUG00000011500;ENSOCUG00000005279;ENSOCUG00000003866;ENSOCUG00000013412;ENSOCUG00000001765;ENSOCUG00000005596;ENSOCUG00000022536;ENSOCUG00000006698;ENSOCUG00000015320;ENSOCUG00000000171;ENSOCUG00000005091;ENSOCUG00000005708;ENSOCUG00000002424;ENSOCUG00000007086;ENSOCUG00000014282;ENSOCUG00000003792;ENSOCUG00000011452;ENSOCUG00000026419	ENSOCUG00000023425;ENSOCUG00000004834;ENSOCUG00000029663;ENSOCUG00000026917;ENSOCUG00000027003;ENSOCUG00000026304;ENSOCUG00000008071;ENSOCUG00000029657;ENSOCUG00000005924;ENSOCUG00000000049;ENSOCUG00000011700;ENSOCUG00000002607;ENSOCUG00000022473;ENSOCUG00000007039;ENSOCUG00000005827;ENSOCUG00000015957;ENSOCUG00000017141;ENSOCUG00000002562;ENSOCUG00000029348;ENSOCUG00000020975;ENSOCUG00000015877;…	#
ENSOCUG00000008086	GO:0001968;GO:0005515;GO:0005518;GO:0030335;GO:0043236;GO:0046813;GO:0070062;GO:0090005;GO:0003674;	ENSOCUG00000007069	GO:0000122;GO:0000166;GO:0001525;GO:0001657;GO:0001701;GO:0002053;GO:0003148;GO:0003149;GO:0004672;GO:0004713;GO:0004714;GO:0005007;GO:0005515;GO:0005515;GO:0005524;GO:0005634;GO:0005634;GO:0005654;GO:0005737;GO:0005887;GO:0005938;GO:0006468;GO:0007267;GO:0007409;GO:0007528;GO:0008284;GO:0008284;GO:0008285;GO:0008543;GO:0008543;GO:0008589;GO:0009791;GO:0009880;GO:0009887;GO:0009986;GO:0010453;GO:…	#			intracellular	GO:0005622	94	0.142209	140	0.137931	234	0.139618	8850	0.151588	4.31664e-06	5.36485	ENSOCUG00000000585;ENSOCUG00000024739;ENSOCUG00000004821;ENSOCUG00000021506;ENSOCUG00000005279;ENSOCUG00000002818;ENSOCUG00000002396;ENSOCUG00000005091;ENSOCUG00000000664;ENSOCUG00000017831;ENSOCUG00000000104;ENSOCUG00000001212;ENSOCUG00000009203;ENSOCUG00000000148;ENSOCUG00000000568;ENSOCUG00000011482;ENSOCUG00000026992;ENSOCUG00000000007;ENSOCUG00000002132;ENSOCUG00000001923;ENSOCUG00000023019;…	ENSOCUG00000024833;ENSOCUG00000017233;ENSOCUG00000005933;ENSOCUG00000011858;ENSOCUG00000023396;ENSOCUG00000024778;ENSOCUG00000000793;ENSOCUG00000021801;ENSOCUG00000010340;ENSOCUG00000017653;ENSOCUG00000013292;ENSOCUG00000011463;ENSOCUG00000024783;ENSOCUG00000013150;ENSOCUG00000021158;ENSOCUG00000026540;ENSOCUG00000002177;ENSOCUG00000027003;ENSOCUG00000025542;ENSOCUG00000027444;ENSOCUG00000017744;…	#
ENSOCUG00000008229	GO:0000979;GO:0000993;GO:0001162;GO:0005515;GO:0005515;GO:0005634;GO:0006334;GO:0006469;GO:0014904;GO:0018024;GO:0033138;GO:0045184;GO:0045944;GO:0071549;GO:0003674;	ENSOCUG00000007545	GO:0000166;GO:0004672;GO:0004713;GO:0005003;GO:0005515;GO:0005524;GO:0005887;GO:0006468;GO:0007169;GO:0016020;GO:0016021;GO:0016772;GO:0035898;GO:0048013;GO:0055074;GO:0003674;GO:0004871;GO:0005575;GO:0005623;GO:0005886;GO:0006464;GO:0007165;GO:0008150;GO:0016301;GO:0043167;	#			microtubule organizing center	GO:0005815	3	0.00453858	5	0.00492611	8	0.00477327	405	0.00693707	0.61643	0.210116	ENSOCUG00000002396;ENSOCUG00000004340;ENSOCUG00000023898	ENSOCUG00000022921;ENSOCUG00000021669;ENSOCUG00000009644;ENSOCUG00000001822;ENSOCUG00000025898	#
ENSOCUG00000008303	GO:0004222;GO:0005509;GO:0005576;GO:0006508;GO:0008233;GO:0008237;GO:0008270;GO:0016787;GO:0031012;GO:0035313;GO:0042060;GO:0046872;GO:0060054;GO:0003674;GO:0005575;GO:0005576;GO:0006950;GO:0008150;GO:0008233;GO:0043167;	ENSOCUG00000007622	GO:0001525;GO:0004888;GO:0004930;GO:0004930;GO:0005518;GO:0007166;GO:0007186;GO:0007218;GO:0007266;GO:0007420;GO:0008285;GO:0010573;GO:0016020;GO:0016021;GO:0021801;GO:0021819;GO:0035025;GO:0045785;GO:0050840;GO:0070062;GO:0070528;GO:0097451;GO:2001223;GO:0003674;GO:0004871;GO:0005575;GO:0007165;GO:0008150;	#			nuclear envelope	GO:0005635	1	0.00151286	1	0.000985222	2	0.00119332	207	0.00354561	0.93306	0.0300903	ENSOCUG00000011746	ENSOCUG00000021669	#
ENSOCUG00000008439	GO:0000122;GO:0000976;GO:0000982;GO:0003676;GO:0003677;GO:0003700;GO:0006355;GO:0006366;GO:0009749;GO:0030217;GO:0030509;GO:0032868;GO:0033233;GO:0035035;GO:0035914;GO:0043565;GO:0044212;GO:0045893;GO:0045944;GO:0046872;GO:0070498;GO:0071310;GO:0071480;GO:0090090;GO:0001071;GO:0002376;GO:0003674;GO:0003677;GO:0007165;GO:0008150;GO:0009058;GO:0019899;GO:0030154;GO:0034641;GO:0043167;GO:0048856;GO:…	ENSOCUG00000007722	GO:0005488;GO:0005515;GO:0005515;GO:0005794;GO:0005798;GO:0005798;GO:0006810;GO:0006886;GO:0008565;GO:0015031;GO:0016020;GO:0016020;GO:0016192;GO:0030117;GO:0030131;GO:0030133;GO:0030133;GO:0003674;GO:0005575;GO:0005622;GO:0005623;GO:0005737;GO:0005794;GO:0006810;GO:0008150;GO:0008565;GO:0016023;GO:0016192;GO:0043226;GO:0043234;	#			nucleoplasm	GO:0005654	13	0.0196672	15	0.0147783	28	0.0167064	1701	0.0291357	0.927939	0.0324806	ENSOCUG00000002132;ENSOCUG00000022201;ENSOCUG00000028094;ENSOCUG00000021506;ENSOCUG00000008439;ENSOCUG00000001212;ENSOCUG00000017831;ENSOCUG00000015681;ENSOCUG00000001933;ENSOCUG00000023377;ENSOCUG00000008781;ENSOCUG00000012339;ENSOCUG00000011746	ENSOCUG00000026188;ENSOCUG00000007069;ENSOCUG00000001405;ENSOCUG00000024492;ENSOCUG00000001158;ENSOCUG00000024142;ENSOCUG00000001353;ENSOCUG00000021242;ENSOCUG00000007470;ENSOCUG00000026384;ENSOCUG00000002076;ENSOCUG00000016465;ENSOCUG00000015195;ENSOCUG00000009376;ENSOCUG00000021297	#
ENSOCUG00000008651	-	ENSOCUG00000007737	GO:0000166;GO:0004672;GO:0004674;GO:0004713;GO:0005515;GO:0005524;GO:0006468;GO:0016772;GO:0003674;GO:0006464;GO:0008150;GO:0016301;GO:0043167;	#			organelle	GO:0043226	93	0.140696	147	0.144828	240	0.143198	8424	0.144291	2.37473e-09	8.62439	ENSOCUG00000009279;ENSOCUG00000008439;ENSOCUG00000009677;ENSOCUG00000016771;ENSOCUG00000017845;ENSOCUG00000014074;ENSOCUG00000009939;ENSOCUG00000001030;ENSOCUG00000002956;ENSOCUG00000023274;ENSOCUG00000006500;ENSOCUG00000002203;ENSOCUG00000005377;ENSOCUG00000003641;ENSOCUG00000009906;ENSOCUG00000015320;ENSOCUG00000006698;ENSOCUG00000003866;ENSOCUG00000001461;ENSOCUG00000003824;ENSOCUG00000011746;…	ENSOCUG00000022774;ENSOCUG00000013079;ENSOCUG00000016271;ENSOCUG00000007069;ENSOCUG00000002480;ENSOCUG00000023194;ENSOCUG00000005767;ENSOCUG00000011742;ENSOCUG00000026830;ENSOCUG00000029328;ENSOCUG00000013123;ENSOCUG00000000078;ENSOCUG00000029663;ENSOCUG00000004834;ENSOCUG00000026791;ENSOCUG00000026727;ENSOCUG00000009679;ENSOCUG00000001114;ENSOCUG00000005924;ENSOCUG00000001353;ENSOCUG00000006986;…	#
ENSOCUG00000008781	GO:0004222;GO:0005515;GO:0005515;GO:0005654;GO:0005739;GO:0005886;GO:0006508;GO:0008237;GO:0008270;GO:0017124;GO:0003674;GO:0008150;GO:0008233;GO:0043167;	ENSOCUG00000007765	GO:0003824;GO:0004648;GO:0005737;GO:0006564;GO:0008152;GO:0008483;GO:0008652;GO:0016740;GO:0030170;GO:0070062;GO:0003674;GO:0006520;GO:0008150;GO:0009058;GO:0043167;GO:0044281;	#			plasma membrane	GO:0005886	43	0.065053	71	0.0699507	114	0.0680191	4086	0.0699873	0.000605884	3.21761	ENSOCUG00000009677;ENSOCUG00000028094;ENSOCUG00000003285;ENSOCUG00000009279;ENSOCUG00000002243;ENSOCUG00000001030;ENSOCUG00000022947;ENSOCUG00000011624;ENSOCUG00000001933;ENSOCUG00000008858;ENSOCUG00000003056;ENSOCUG00000024555;ENSOCUG00000016771;ENSOCUG00000005377;ENSOCUG00000002203;ENSOCUG00000006500;ENSOCUG00000000007;ENSOCUG00000001923;ENSOCUG00000003824;ENSOCUG00000001461;ENSOCUG00000011746;…	ENSOCUG00000005321;ENSOCUG00000007722;ENSOCUG00000003521;ENSOCUG00000023857;ENSOCUG00000026334;ENSOCUG00000001490;ENSOCUG00000021659;ENSOCUG00000014298;ENSOCUG00000024222;ENSOCUG00000008823;ENSOCUG00000014307;ENSOCUG00000011082;ENSOCUG00000016751;ENSOCUG00000009990;ENSOCUG00000014420;ENSOCUG00000004727;ENSOCUG00000017791;ENSOCUG00000025868;ENSOCUG00000016487;ENSOCUG00000007545;ENSOCUG00000001353;…	#
ENSOCUG00000008858	GO:0003050;GO:0003050;GO:0003824;GO:0004252;GO:0005044;GO:0005515;GO:0005887;GO:0005887;GO:0006508;GO:0006898;GO:0007565;GO:0007565;GO:0007565;GO:0008217;GO:0008217;GO:0009986;GO:0009986;GO:0016020;GO:0016486;GO:0016486;GO:0016486;GO:0035813;GO:0035813;GO:0070008;GO:0000003;GO:0003013;GO:0003674;GO:0005575;GO:0005623;GO:0005886;GO:0006810;GO:0008150;GO:0008233;GO:0016192;GO:0051604;	ENSOCUG00000008018	GO:0007155;GO:0007229;GO:0008305;GO:0009897;GO:0009897;GO:0016020;GO:0016021;GO:0005575;GO:0005623;GO:0005886;GO:0007155;GO:0007165;GO:0008150;GO:0043234;	#			protein complex	GO:0043234	23	0.0347958	49	0.0482759	72	0.0429594	2880	0.0493303	0.0634591	1.19751	ENSOCUG00000015681;ENSOCUG00000002622;ENSOCUG00000016576;ENSOCUG00000013968;ENSOCUG00000011746;ENSOCUG00000004900;ENSOCUG00000021506;ENSOCUG00000002396;ENSOCUG00000002132;ENSOCUG00000001454;ENSOCUG00000005377;ENSOCUG00000004340;ENSOCUG00000024555;ENSOCUG00000023790;ENSOCUG00000003792;ENSOCUG00000001030;ENSOCUG00000003277;ENSOCUG00000000568;ENSOCUG00000028094;ENSOCUG00000024196;ENSOCUG00000022201;…	ENSOCUG00000013079;ENSOCUG00000017233;ENSOCUG00000006667;ENSOCUG00000022774;ENSOCUG00000015149;ENSOCUG00000016271;ENSOCUG00000021801;ENSOCUG00000022921;ENSOCUG00000024778;ENSOCUG00000002480;ENSOCUG00000014447;ENSOCUG00000023535;ENSOCUG00000013123;ENSOCUG00000015957;ENSOCUG00000013150;ENSOCUG00000008018;ENSOCUG00000029663;ENSOCUG00000027003;ENSOCUG00000016487;ENSOCUG00000011497;ENSOCUG00000014246;…	#
ENSOCUG00000008935	GO:0005634;GO:0005730;GO:0005575;GO:0005622;GO:0005623;GO:0005634;GO:0005730;GO:0043226;	ENSOCUG00000008071	GO:0001540;GO:0002020;GO:0002062;GO:0004866;GO:0004869;GO:0005515;GO:0005576;GO:0005576;GO:0005615;GO:0005829;GO:0006952;GO:0010466;GO:0010466;GO:0010711;GO:0010716;GO:0010951;GO:0030414;GO:0034103;GO:0043206;GO:0045861;GO:0048469;GO:0060311;GO:0060313;GO:0070062;GO:0003674;GO:0005575;GO:0005576;GO:0005622;GO:0005623;GO:0005737;GO:0005829;GO:0008150;GO:0021700;GO:0030154;GO:0030234;GO:0048856;	#			proteinaceous extracellular matrix	GO:0005578	16	0.0242057	10	0.00985222	26	0.0155131	209	0.00357987	3.51606e-13	12.4539	ENSOCUG00000015143;ENSOCUG00000012042;ENSOCUG00000000370;ENSOCUG00000001188;ENSOCUG00000024465;ENSOCUG00000026419;ENSOCUG00000001525;ENSOCUG00000028053;ENSOCUG00000011482;ENSOCUG00000011500;ENSOCUG00000009507;ENSOCUG00000013686;ENSOCUG00000017958;ENSOCUG00000015020;ENSOCUG00000003866;ENSOCUG00000022093	ENSOCUG00000010681;ENSOCUG00000011700;ENSOCUG00000022473;ENSOCUG00000004013;ENSOCUG00000011793;ENSOCUG00000026917;ENSOCUG00000022293;ENSOCUG00000005827;ENSOCUG00000015957;ENSOCUG00000027230	#
ENSOCUG00000009050	GO:0000904;GO:0000904;GO:0001764;GO:0001764;GO:0005515;GO:0005515;GO:0005615;GO:0005615;GO:0005737;GO:0005737;GO:0007411;GO:0007411;GO:0007417;GO:0007417;GO:0007420;GO:0007420;GO:0007616;GO:0007616;GO:0008306;GO:0008306;GO:0010001;GO:0010001;GO:0010468;GO:0010468;GO:0010976;GO:0010976;GO:0014068;GO:0014068;GO:0016358;GO:0016358;GO:0016477;GO:0016477;GO:0018108;GO:0018108;GO:0021511;GO:0021511;GO:…	ENSOCUG00000008644	GO:0005158;GO:0005886;GO:0043548;GO:0003674;	#			thylakoid	GO:0009579	0	0	0	0	0	0	0	0	1	0	-	-	#
ENSOCUG00000009203	GO:0004888;GO:0004888;GO:0004888;GO:0004930;GO:0005515;GO:0005887;GO:0005887;GO:0007186;GO:0016021;GO:0016500;GO:0032588;GO:0032588;GO:0048839;GO:0048839;GO:0090263;GO:0090263;GO:0090263;GO:0003674;GO:0004871;GO:0005575;GO:0005622;GO:0005623;GO:0005886;GO:0007165;GO:0008150;GO:0043226;GO:0048856;	ENSOCUG00000008678	-	#		Molecular Function	molecular function	GO:0003674	143	0.498258	235	0.551643	378	0.530154	14496	0.56008	6.52391e-13	12.1855	ENSOCUG00000008781;ENSOCUG00000025374;ENSOCUG00000004422;ENSOCUG00000024465;ENSOCUG00000004340;ENSOCUG00000025799;ENSOCUG00000027804;ENSOCUG00000008229;ENSOCUG00000004205;ENSOCUG00000005692;ENSOCUG00000005357;ENSOCUG00000027394;ENSOCUG00000006752;ENSOCUG00000022536;ENSOCUG00000027099;ENSOCUG00000025109;ENSOCUG00000009050;ENSOCUG00000001454;ENSOCUG00000021352;ENSOCUG00000004900;ENSOCUG00000022296;…	ENSOCUG00000023708;ENSOCUG00000024631;ENSOCUG00000007069;ENSOCUG00000002480;ENSOCUG00000011742;ENSOCUG00000005767;ENSOCUG00000017271;ENSOCUG00000026281;ENSOCUG00000012696;ENSOCUG00000016271;ENSOCUG00000001102;ENSOCUG00000023550;ENSOCUG00000013079;ENSOCUG00000007545;ENSOCUG00000026727;ENSOCUG00000009679;ENSOCUG00000005924;ENSOCUG00000013891;ENSOCUG00000001353;ENSOCUG00000001114;ENSOCUG00000000078;…	#
ENSOCUG00000009279	GO:0000166;GO:0002790;GO:0002790;GO:0005102;GO:0005515;GO:0005515;GO:0005524;GO:0005548;GO:0005548;GO:0005548;GO:0005794;GO:0005794;GO:0005886;GO:0005886;GO:0005886;GO:0005887;GO:0005887;GO:0005887;GO:0006200;GO:0006497;GO:0006497;GO:0006911;GO:0006911;GO:0007040;GO:0007040;GO:0007186;GO:0007186;GO:0008203;GO:0008203;GO:0008203;GO:0008509;GO:0008509;GO:0009897;GO:0010875;GO:0010875;GO:0016197;GO:…	ENSOCUG00000008805	GO:0001701;GO:0001829;GO:0001948;GO:0003382;GO:0005509;GO:0005509;GO:0005515;GO:0005515;GO:0005737;GO:0005737;GO:0005802;GO:0005886;GO:0005886;GO:0005886;GO:0005911;GO:0005912;GO:0005913;GO:0005913;GO:0005925;GO:0007155;GO:0007156;GO:0007605;GO:0008013;GO:0008013;GO:0009898;GO:0009986;GO:0015629;GO:0016020;GO:0016021;GO:0016021;GO:0016235;GO:0016323;GO:0016328;GO:0016337;GO:0016337;GO:0016339;GO:…	#			cytoskeletal protein binding	GO:0008092	10	0.0348432	13	0.0305164	23	0.0322581	506	0.0195503	0.000475278	3.32305	ENSOCUG00000003277;ENSOCUG00000009939;ENSOCUG00000001923;ENSOCUG00000001723;ENSOCUG00000023377;ENSOCUG00000014074;ENSOCUG00000015681;ENSOCUG00000024272;ENSOCUG00000002396;ENSOCUG00000028094	ENSOCUG00000005634;ENSOCUG00000011386;ENSOCUG00000022921;ENSOCUG00000021801;ENSOCUG00000003436;ENSOCUG00000016130;ENSOCUG00000015634;ENSOCUG00000001822;ENSOCUG00000025898;ENSOCUG00000015957;ENSOCUG00000006986;ENSOCUG00000008805;ENSOCUG00000011683	#
[truncated: 215 more rows]

## Sheet: KEGG Enrichment Analysis
Category	Pathway	Genome	DE Gene	P-value	-Log10(P-Value)
Metabolism	Overview	182	7	0.0892169	1.04955
	Carbohydrate metabolism	410	12	0.155168	0.809197
	Energy metabolism	175	2	0.884311	0.0533949
	Lipid metabolism	495	24	0.000139646	3.85497
	Nucleotide metabolism	196	3	0.781501	0.107071
	Amino acid metabolism	284	14	0.0028424	2.54632
	Metabolism of other amino acids	97	4	0.146557	0.833993
	Glycan biosynthesis and metabolism	248	5	0.596556	0.224349
	Metabolism of cofactors and vitamins	188	9	0.0180002	1.74472
	Metabolism of terpenoids and polyketides	28	2	0.116021	0.935463
	Biosynthesis of other secondary metabolites	32	1	0.492448	0.307639
	Xenobiotics biodegradation and metabolism	194	12	0.000845828	3.07272
	Enzyme families	0	0	1	0
Genetic Information Processing	Transcription	143	0	1	0
	Translation	422	7	0.783897	0.105741
	Folding, sorting and degradation	363	4	0.947906	0.0232346
	Replication and repair	158	1	0.965176	0.0153935
	RNA family	0	0	1	0
Environmental Information Processing	Membrane transport	27	1	0.43568	0.360832
	Signal transduction	1816	70	5.2342e-07	6.28115
[truncated: 22 more rows]
